# Supplementary material for: Loss-of-function of gynoecium-expressed phospholipase triggers haploid induction
Source: Research Square preprint supplement (doi:10.21203/rs.3.rs-2112857/v1), 2022-10-11
Supplement: Supplementary file 1 [file e22eb0a78e24665a2ea2111c.docx]

| **Supplementary Table 1. Amino acid sequences used to construct the phylogenetic tree in Fig. 1a.** |
| --- |
| **>AtpPLAI (At1g61850)**  MSWGLGWKRSSESFRLSLSYGADDLNDDPIQSPSASPFGSPTSMSSTCSSPSAVEDPELGFRIDLDWTAGDSEDQVALRLESQLMVALPAPHDTVVVELKGIGDDDEGGLENVGLEMRVEKRREPLRAVTLMKAVGSGQQYDGVGVLTRLMRSDMMPAAIPAPAIDVASSCGVHWKTVTSLSLSGCGLLVMPVEVTELPLLEKLCLEHNKLSVLPPEIGKLKNLKILRVDNNMLISVPVELRQCVGLVELSLEHNKLVRPLLDFRAMAGLRILRLFGNPLEFLPEILPLHQLRHLSLVNIRIVSDENLRSVNVQIETENTSYFGASRHKLSAFSPLIFRSSSCHHPLLASTLVKIMQDEGNRSVIGKDENAVRQLISMITSDNQHVVEQACVALSSLARDVGVAMQLMKCDIMKPTETVLKSSSPDEVISVLQVVVTLAFVSDSVSQKMLTKDMLKALKSLCAHKNPEVQRQALLAVGNLAFCLENRRILITSESLRELLMRLIVTPEPRVNKAAARALAILGENEILRRSIKGRQVPKQGLRILTMDGGGMKGLATVQILKEIEKGSGKPIHELFDLICGTSTGGMLAIALGVKLMTLEQCEEIYKNLGKLVFAESVPKDNEAASWREKLDQLYKSSSQSFRVVIHGSKHSANEFERLLKEMCADEDGDLLIESAVKNVPKVFVVSTLVSVMPAQPFIFRNYQYPVGTPEMSYAFSDHSGGSTLTSSTASDQAGYYKQSAFMGSCKHQVWQAIRASSAAPYYLDDFSVDSYRWQDGAIVANNPTIFAIREAQLLWPDTKIDCLVSIGSGSVPTRVRKGGWRYLDTGQVLIESACSVERVEEALSTLLPMLPEIQYFRFNPVDDRCGMELDETDPAIWLKLEAAIEEFIQSNPQVFKNVCERLTLPFLNDEKWCDNLKPRFMNGKLPNSRVESSPSLGWRRNVLLMEAQHSPDSGRVKYHARALESFCSNNGIKLSSLHTTATPGCQKPSPGTAFPTPFTSPLITGSLPPSPLLFTPELGPQKFNRIDMVPPLSLDGGHVGKTVMSPPSSPPRQRQLYLPLRQMHEKLQNLPQVGILHLSLQNDSNGSILSWQNDVFVVAEPGDLADKFLQSVKVSILSVMQSNRRKAASVLSNICSISDLVRSKKCFQVGNIIHRYIGRQTLVMEDDQEIASFMFRRTVPSAHLTPDDIRWMVMLLLDFCIPKIAERLAFAHIYLLSHSLKG |
| **>AtpPLAIIα (At2g26560)**  MQMDSPKSPLQPPTYGNLVTILSIDGGGIRGLIPAVILGFLESELQKLDGEEARLADYFDVIAGTSTGGLVTAMLTAPNKEGRPLFAASEIKDFYLEQCPKIFPQDHFPFSAAKKLVKSLTGPKYDGKYLHQLIHAKLGDTKLSQTLTNVVIPTFDIKHLQPTIFSSYEVKNHPLKDATLADIAISTSAAPTYLPAHFFKVEDLNGNAKEYNLIDGGVAANNPALLAIGEVTNEISGGSSDFFPIRPNDYGRFLVLSLGTGNHKAEEKFNAKEVAGWGLLNWLTHDNSTPIIDAFSQASSDMVDFHLSAVFRALHSEANYIRIQDDTLTGDAASVDIATVENLDILAKTGDELLKKPVARVNLDSGCNENAYETTNEHALIKLAGILSKEKKIRDIRSPHAKAPIRI |
| **>AtpPLAIIβ (At5g43590)**  MVQWLMTRFVGRYHRSNAFHCVSKLATINNFSGKKIQNFGIPRARLSSNESYNQFSEKEELVIKDDSMFKNNKPPKYGNLVTILSLDGGGVRGIIGGVILANLEKHLQEIDNDESVRLADYFDVIAGTSTGGLMTAMLTAPNDSGRPLYAAKDIVPFYLEESPKIFYGSKWWDPSALWALFRPKYNGEYLHTRLGEILGETKLDQTLTNVVIPTFDIKKLQPTIFSSYHASVDPSLNAKLSDICIGTSAAPFYLPPYKFPENDKMRTFNLIDGGVTANDPTLVGMTAMSRKSIIKHPDMDGFKPLEYEKYIVISIGTGSAKREEYYSAVEAAKWGFENWAYNWKHKTTPILDIIFESSRDMVQYHTSVLFQALESEDNYLRIDADTLKKDEVFMDDSETLNLENLKNIGEKLLDTNVMRMNLDTYTYEPIPKTVNNDQELKRFAKILSDEKKLRNKTFKTMIDDSSNS |
| **>AtpPLAIIγ (At4g37050)**  MDTERGSISSSEISRTAHLQDRTVACLPPSYGQLVTILSIDGGGIRGIIPGTILAYLESQLQELDGEEARLVDYFDVISGTSTGGLIVAMLTAQDQSGGHSRNSNRPLFEAKEIVPFYLKHSPKIFPQPRGIFCGWGETIVRLVGGPKFNGKYLHDLVEGFLGDTKLTQSLTNVVIPCFDIKKLQPVIFSSYQAVNNQAMNAKLSDICISTSAAPTFFPAHRFTNEDSEGIKHEFNLIDGGIAANNPTLCAIAEVTKQIIKKNPVMGDISPLDFTRFLVISIGTGSIRNQEKYNAKMASKWGLMCWVFESGSTPILDCYSEAIHDMVDYQSSVVFQALRSEKNYLRIDDDSLKGDLGSVDISTEKNMEGLVEVGEALLKKRVSRVNLESGHYQPISENVTNEEALKRFAKVLSEERKLRESRSPKLKI |
| **>AtpPLAIIδ (At4g37060)**  MENESPSKKNMPPSCGTLVTILSLDGGGVRGIIAGVILAYLEKQLQVYIYINFSRMQVTKIVDTYDRIITRHANFVVELDGEHVRVADYFDVIAGTSTGGLVTAMLTAPDENGRPRFAAKEIVPFYLEHCPKIFPQPTGVLALLPKLPKLLSGPKYSGNYLRTTLGKLLGETKLRQTLTNVVIPTFDIKTLQPTIFSSYQALTDPSLDVKVSDICIGTSAAPTYFPPYYFSNEDSQGKTRHFNLVDGGVTANNPTLVAMTAVTKQIVNNNPDMGTLNPLGYDQFLVISIGTGSAKKEERYSAKKAAKWGIISWLYEDGTTPILDITFESSRDIVHYHSSVVFKALQSEDKYLRIDDDTLEGDASTLDLSTKSNLENLIKLGEKMLTNRVMQMNIDTGTYEPAAENINNDEQLKRFAKILSEERKLRRKRSDKMTKDSSIGSQEIK |
| **>AtpPLAIIε (At4g37070)**  MENKSPSKKNKPPSCGSLVTILSLDGGGVRGIIAGVILAFLEKQLQELDGEEARLADYFDVIAGTSTGGLVTAMLTVPDETGRPHFAAKDIVPFYLEHCPKIFPQPTGVLALLPKLPKLLSGPKYSGKYLRNLLSKLLGETRLHQTLTNIVIPTFDIKKLQPTIFSSYQLLVDPSLDVKVSDICIGTSAAPTFFPPHYFSNEDSQGNKTEFNLVDGAVTANNPTLVAMTAVSKQIVKNNPDMGKLKPLGFDRFLVISIGTGSTKREEKYSAKKAAKWGIISWLYDDGSTPILDITMESSRDMIHYHSSVVFKALQSEDKYLRIDDDTLEGDVSTMDLATKSNLENLQKIGEKMLTNRVMQMNIDTGVYEPVAENITNDEQLKRYAKILSDERKLRRLRSD TMIKDSSNESQEIK |
| **>AtpPLAIIIα (At2g39220)**  MLTTMQRVHNKPIDSIGGFKHLVKQSNGGDGGVTATDMQEPSIETDKLSYEIFSILESKFLFGYDDDLKLMESRSRDPSPEQETASPAMVEALNGVVPGTVKNQRGKVCVLSIDSGGMRGIIPGKALAYLEHALKSKSGDPNARIADYFDVASGSGIGGIFTAMLFASSDGNRPIFKAEDTWRFLAMKGKSFYNKSPPGILNRVMKTGSGGSGGSGSKLEKAMKESFEELTLKDTLKPVLIPCYDLTSSAPFLFSRADALETDGYDFKLWEVCRATWAEPGVFEPVEMRSVDGKTRCVAVDGGLAMSNPTAAAITHVLHNKQEFPFVRGVEDLLVLSLGTGQLVDVKYDCDKVMKWKAKHWARPAVRISADGAADTVDQAVSMAFGQCRRSNYVRIQANGSSFGPCKPNIDTDASPSNVNMLVGVAEEMLKQKNAESVLFGGKKINEESNYEKLDWLAGELVLEHQRRSCRIAPTVAFKQSGDRRVDQQTIFKDIDCMF |
| **>AtpPLAIIIβ (At3g54950)**  MHRVRNKPVKSTATASVKHLIKQRGGDGATAASKSANDYNNNDSLLTDMQEPSIDTDKLSYEIFSILESKFLFGYDDSKPEPANSVVAGSIKNQRGKICILSIDGGGMRGILPGKALAYLEHALKSKSGDPNARIADYFDVAAGSGIGGIYTAMLFGSRDGNRPIFKADDTWQFLTRNAKGLYGGAGILKRVLRTGSGCCSGTAKLKKVMKESFSELTLKDTLKPVLIPCYDLKSSGPFLFSRADALETDGYDFRLSEVCRATWAEPGVFEPVEMKSVDGQTKCVAVGGGLAMSNPTAAAITHVLHNKQEFPFVRGVEDLLVLSLGMGQLLDVSYEYDRIIKWKAKHWARPAALISNDGAADTVDQAVAMAFGHCRSSNYVRIQANGSNLGPWSPNMDTDPSGSNVNMLMGVAEEMLKQKNVESVLFGGKRIDEQSNFEKLDWLAGELVLEHQRRNSRIAPTVAFKQSVHRADQKTSDKDIGVTARER |
| **>AtpPLAIIIγ (At4g29800)**  MNRRYEKPPPLSVSSKGKKKHFVNHTAPNTPGNYERTQTSPTLSTARSHEPDDKLNYEIFSILESKFLFGYEDPRLLWIPQSPLRPGDSEAGPSPRSPLTPNGVVLPGTPSSSFRSPRGRICVLSIDGGGMRGLLAGKSLIYLEQMLKEKSGDPNARIADYFDVAAGSGVGGVFAAMIFATRDGNRPIFKAEDTWKFLVENAEGFYRSGSGSGGGGAGAAIKRVIRSGSGSGSSSVTAATAKLEKAMKASFADLTLKDTLKPILISCYDLSSTAPFLFSRADALESDSFDFRLRDICRATWAEPGTFDPVRTCSVDGKTRCVAVGGGLAMSNPTAAAITHVFHNKQEFPAVKGVEDLLVLSLGTGQLFEVNYDYEQVKNWRVKEWARPMARISGDGSAEFVDQAVAMGFGPYRSSNYVRIQQANGSRLGACGPNVDTDPRAENVKKLTEIADEMLKQNNVESVLFGSKRIGEMSNSEKIEWFASELVIEQQRRSVRASPTVTLKQAVSKTNRNAINATLTLISKDR |
| **>AtpPLAIIIδ (At3g63200)**  MEMDLSKVTLDIFTKLEQKWLSHCDSSRKTRILSIDGGGTTGIVAAASILHLEHQIRLQTGDPHAHISDFFDIVAGTGIGGILAALLVADDGSGRPMFTARDAVKFVAEKNSELFEIRYTGVFRRNKRYSGKSMERVLETAFRREDGKVLTMKDTCKPLLVPCYDLKTSAPFVFSRAGASESPSFDFELWKVCRATSATPSLFKPFSVVSVDGKTSCSAVDGGLVMNNPTAAAVTHVLHNKRDFPSVNGVDDLLVLSLGNGPSTMSSSPGRKLRRNGDYSTSSVVDIVVDGVSDTVDQMLGNAFCWNRTDYVRIQANGLTSGGAEELLKERGVETAPFGVKRILTESNGERIEGFVQRLVASGKSSLPPSPCKESAVNPLADGR |
| **>OsMTL (LOC_Os03g27610)**  MAASYSCRRTCEACSTRAMAGCVVGEPASAPGQRVTLLAIDGGGIRGLIPGTILAFLEARLQELDGPDARLADYFDCIAGTSTGGLITAMLAAPGDHGRPLFAASDINRFYLDNGPLIFPQKRCGMAAAMAALTRPRYNGKYLQGKIRKMLGETRVRDTLTNVVIPTFDVRLLQPTIFSTYDAKSMPLKNALLSDICISTSAAPTYLPAHCFQTTDDATGKVREFDLIDGGVAANNPTMVAMTQITKKIMVKDKEELYPVKPSDCGKFLVLSVGTGSTSDQGMYTARQCSRWGIVRWLRNKGMAPIIDIFMAASSDLVDIHAAVMFQSLHSDGDYLRIQDNTLHGDAATVDAATRDNMRALVGIGERMLAQRVSRVNVETGRYVEVPGAGSNADALRGFARQLSEERRARLGRRNACGGGGEGEPSGVACKR |
| **>MTL/NLD/ZmPLA1 (GRMZM2G471240)**  MASYSSRRPCNTCSTKAMAGSVVGEPVVLGQRVTVLTVDGGGVRGLIPGTILAFLEARLQELDGPEARLADYFDYIAGTSTGGLITAMLTAPGKDKRPLYAAKDINHFYMQNCPRIFPQKSRLAAAMSALRKPKYNGKCMRSLIRSILGETRVSETLTNVIIPAFDIRLLQPIIFSTYDAKSTPLKNALLSDVCIGTSAAPTYLPAHYFQTEDANGKEREYNLIDGGVAANNPTMVAMTQITKKMLASKDKAEELYPVKPSNCRRFLVLSIGTGSTSEQGLYTARQCSRWGICRWLRNNGMAPIIDIFMAASSDLVDIHVAAMFQSLHSDGDYLRIQDNSLRGAAATVDAATPENMRTLVGIGERMLAQRVSRVNVETGRYEPVTGEGSNADALGGLARQLSEERRTRLARRVSAINPRGSRCASYDI |
| **>TaPLA-A (TraesCS4A02G018100)**  MASYWCRRPCESCSTRAMAGSVVGQPVAPGQRVTVLTIDGGGIRGIIPGTILDFLEAKLQELDGPGARLADYFDCIAGTSTGGLITAMITAPGKDGRPLFAARDVNRFYLDNGPYIFPQRRCALAAVTASLRRPRYSGKYLHGKIRSMLGETRLCDALTDVVIPTFDVKLLQPIIFSTYDAKSMPLKNARLADICIGTSAAPTYLPAHHFHTHDGNGKEREYNLIDGGVAANNPTMVAMTQITKKMMGKDREELYPVKPSDCGKFLVMSVGTGSTSDQGLYTAKQCSQWGIISWLRNKGMAPIIDIFMAASSDLVDIHAAVLFQSLHSDGDYLRIQDNSLHGPAATVDAATPENMAELLRIGERMLAQRVSRVNVETGRYEEVKGAGSNADALAGFARQLSDERRTRLERRRGGAGRLKSRR |
| **>TaPLA-A (TraesCS4A02G018100)**  MASYWCRRPCESCSTRAMAGSVVGQPVAPGQRVTVLTIDGGGIRGIIPGTILDFLEAKLQELDGPGARLADYFDCIAGTSTGGLITAMITAPGKDGRPLFAARDVNRFYLDNGPYIFPQRRCALAAVTASLRRPRYSGKYLHGKIRSMLGETRLCDALTDVVIPTFDVKLLQPIIFSTYDAKSMPLKNARLADICIGTSAAPTYLPAHHFHTHDGNGKEREYNLIDGGVAANNPTMVAMTQITKKMMGKDREELYPVKPSDCGKFLVMSVGTGSTSDQGLYTAKQCSQWGIISWLRNKGMAPIIDIFMAASSDLVDIHAAVLFQSLHSDGDYLRIQDNSLHGPAATVDAATPENMAELLRIGERMLAQRVSRVNVETGRYEEVKGAGSNADALAGFARQLSDERRTRLERRRGGAGRLKSRR |
| **>TaPLA-B (TraesCS4B02G286000)**  MMASYWCRRPCESCSTRAMAGSVVGQPVAPGQRVTVLTIDGGGIRGLIPGTILAFLEAKLQELDGPGARLADYFDCIAGTSTGGLITAMITAPGKDGRPLFAAKDVNRFYLDNGPYIFPQRRCALAAVTASLRRPRYNGKYLHGKIRSMLGETRLCDALTDVVIPTFDVKLLQPIIFSTYDARCMPLKNARLADVCIGTSAAPTCLPAHHFHTHDGNGKEREYNLIDGGVAANNPTMVAMTQITKKMMGKDREELYPVEPSDCGKFLVLSVGTGSTSDQGLYTAKQCSQWGIISWLRNKGMAPIIDIFMAASSDLVDIHAAVLFQSLHSDANYLRIQDNSLHGPAATVDAATPENMAELLRIGERMLAQRVSRVNVETGRYEEIKGAGSNADALAGFARQLSDERRTRLGRRRGGAGRLKSSR |
| **>TaPLA-D (TraesCS4D02G284700)**  MASYWGRRPCESCSTRAMAGSVVGQPVAPGQRVTVLTIDGGGIRGIIPGTILAFLEAKLQELDGPGARLADYFDCIAGTSTGGLITAMITAPGKDGCPLFAARDVNRFYLDNGPYIFPQRRCALAAVTASLRRPRYNGKYLHGKIRSMLGETRLSDALTDVVIPTFDVKLLQPIIFSTYDAKSMPLKNARLADVCIGTSAAPTYLPAHHFHTHDGNGKEREYNLIDGGVAANNPTMVAMTQITKKMMGKDREELYPVEPSDCGKFLVLSVGTGSTSDQGLYTAKQCSQWGIISWLRNKGMAPIIDIFMAASSDLVDIHAAVLFQSLHSDANYLRIQDNSLHGPAATVDAATPENMAELLRIGERMLAQRVSRVNVETGRYEEVKGAGNNADALAGFARQLSDERRTRLGSRRGGAGRLKSSR |
| **>SiMTL (Seita.9G376800)**  MASYSSRRPCNACRTKAMAGSVVGEPVVPGQRVTVLTIDGGGIRGLIPGTILAFLEARLQELDGPEARLADYFDCIAGTSTGGLITAMITTPGEDKRPLFAARDINRFYFDNCPRIFPQSRSSLAAAMSALRKPRYNGKYLRSTIRSMLGETRVSDALTNVVIPTFDIKLIQPIIFSTYDVKNMPLKNALLSDVCISTSAAPTYLPAHYFQIQDAGGKTREYNLIDGGVAANNPTMVAMTQITKMMLAKDKEELYPVKPEDCRKFLVLSIGTGSTSDEGLFTARQCSRWGVVRWLRNNGMAPIIDIFMAASSDLVDIHAAVLFQSLHSDGHSLRGAAATVDAATPENMRTLVGIGERMLAQRVSRVNVETGRYEPVPGEGSNADALVALARQLSDERRARIARRAAAACAGGSRCCSPVKT |
