# Supplementary material for: Loss-of-function of gynoecium-expressed phospholipase triggers haploid induction
Source: Research Square preprint supplement (doi:10.21203/rs.3.rs-2112857/v1), 2022-10-11
Supplement: Supplementary file 2 [file e3bef0cd4fb10c19016cb22a.docx]

| **Supplementary Table 3. List of DNA primers used in this study** | | | |
| --- | --- | --- | --- |
| **Gene**  **(AGI no,)** | **Annotation** | **Primers sequences (5' to 3')** | **Purpose** |
| *AtpPLAIIγ*  (At4g37050) | pPLAIIγ-SalI-5’ | GAGTCGACATGGATACAGAGAGAGGA | Cloning of  *35S:pPLAIIγ-YFP* |
| pPLAIIγ-SmaI-3’ | GTCCCGGGTATCTTGAGTTTAGGAGA |
| pPLAIIγ-xhoI-5’ | CGCTCGAGCTTCGACATCAAGAAACT | Cloning of  *pPLAIIγ:RNAi* |
| pPLAIIγ-KpnI-3’ | TTAGGTACCGGTGCCGCAGATGTACTT |
| pPLAIIγ-xbaI-5’ | CGTCTAGACTTCGACATCAAGAAACT |
| pPLAIIγ-HindIII-3’ | TTCAAGCTTGGTGCCGCAGATGTACTT |
| PrompPLAIIγ -HindIII-5’ | GCAAGCTTGGAAATACAGCCGGAAAATCAC | Cloning of  *prompPLAIIγ-GUS* |
| PrompPLAIIγ -BamHI-3’#1 | GCGGATCCCCCATTAGAACTACCGTTAC |
| PrompPLAIIγ -BamHI-3’#2 | GCGGATCCGATCCTCTCTCTGTATCCAT |
| pPLAIIγ-1F | ATGGATACAGAGAGAGGA | qRT-PCR |
| pPLAIIγ-2R | GGATGGTGAGGAGGCAAG |
| pPLAIIγ-3F | CCGGCACAATCTTAGCTT |
| pPLAIIγ-4R | CTTGCCTCCTCACCATCC |
| pPLAIIγ-5F | GGATGGTGAGGAGGCAAG |
| pPLAIIγ-6R | TGGCTGTGGAAAGATTTTGG |
| pPLAIIγ-7F | GCGGTGAATAATCAAGCTA |
| pPLAIIγ-8R | CTTCCGCAATGGCACATAA |
| pPLAIIγ-9F | GATGATTCGTTGAAGGGTG |
| pPLAIIγ-10R | GAGCTTCTTCATTAGTCAC |
| pPLAIIγ-11F | CTAGTCACACAAACAGATAC |
| pPLAIIγ-12R | GTTCTGTCAGAAGAAAGG |
| *pPLAIIα*  (At2g26560) | pPLAIIα-F | CAAATGGACAGCCCCAAATCTCCT |
| pPLAIIα-R | GGCGGCTGAGAATGGGAAATGATC |
| *pPLAIIβ*  (At5g43590) | pPLAIIβ-F | TCAAGAACAATAAACCGCCG |
| pPLAIIβ-R | GATCCCACCATTTCGATCCA |
| *Actin*  (At5g09810) | Actin-F | GTGTGTCTTGTCTTATCTGGTTCG |
| Actin-R | AATAGCTGCATTGTCACCCGATACT |
| *Oleosin1* (At4g25140) | OLEO1-HindIII-F | CGAAGCTTAGAGACGACGAGGACCTG | Cloning of *prom OLEO1:OLEO1-mRFP* |
| OLEO1-AvrII-R | CACCTAGGAGTAGTGTGCTGGCCACCA |
| *pPLAIIγ:RNAi* construct specific primer set | p35S-F | GCACAATCCCACTATCCTTCG | PCR genotyping of *pPLAIIγ:RNAi*  *x* FAST-Red |
| pPLAIIγ-KpnI-3’ | TTAGGTACCGGTGCCGCAGATGTACTT |
| FAST-Red construct specific primer set | OLEO1-F | TGGTGGCCAGCACACTACT |
| mRFP-MluI-R | TAACGCGTTTAGGCGCCGGTGGAGTG |
