# Supplementary material for: Loss-of-function of gynoecium-expressed phospholipase triggers haploid induction
Source: Research Square preprint supplement (doi:10.21203/rs.3.rs-2112857/v1), 2022-10-11
Supplement: Supplementary file 3 [file ebe521b018e814c73651b4f1.xlsx]

## Sheet: data
	Raw data		Normalization		Log2FoldChange	Annotation_Phytozome
Gene id	col_0_silique	RNAi_silique	col_0_silique	RNAi_silique	RNAi_silique_vs_col_0_silique	Description	Gene name	PFAM	Panther	KOG	GO	Rice gene id	Rice description
AT1G01010.1	23	34	22	34	0.608987			PF02365	PTHR31989,PTHR31989:SF5		GO:0006355,GO:0003677	LOC_Os08g44820.1	no apical meristem protein, putative, expressed
AT1G01030.1	19	23	18	23	0.327424	AP2/B3-like transcriptional factor family protein	NGA3	PF02362	PTHR31140,PTHR31140:SF4		GO:0003677	LOC_Os03g02900.1	B3 DNA binding domain containing protein, expressed
AT1G01040.2	627	668	623	670	0.104902	dicer-like 1	DCL1	PF04851,PF14709,PF00271,PF00035,PF03368,PF02170,PF00636	PTHR14950,PTHR14950:SF3		GO:0016787,GO:0005524,GO:0003677,GO:0016891,GO:0005515,GO:0006396,GO:0004525,GO:0003723	LOC_Os03g02970.1	Dicer, putative, expressed
AT1G01050.1	401	396	399	398	-0.00466721	pyrophosphorylase 1	PPa1	PF00719	PTHR10286,PTHR10286:SF10	KOG1626	GO:0006796,GO:0005737,GO:0004427,GO:0000287	LOC_Os05g36260.1	soluble inorganic pyrophosphatase, putative, expressed
AT1G01060.1	110	43	109	43	-1.35158	Homeodomain-like superfamily protein	LHY	PF00249	PTHR12802,PTHR12802:SF43			LOC_Os08g06110.3	MYB family transcription factor, putative, expressed
AT1G01070.1	12	6	12	6	-1.11093	nodulin MtN21 /EamA-like transporter family protein	UMAMIT28	PF00892	PTHR31218,PTHR31218:SF10		GO:0016021,GO:0016020,GO:0022857	LOC_Os02g01326.1	auxin-induced protein 5NG4, putative, expressed
AT1G01080.2	453	407	450	408	-0.141131	RNA-binding (RRM/RBD/RNP motifs) family protein		PF00076	PTHR24012	KOG0131	GO:0003676	LOC_Os08g02390.1	RNA recognition motif containing protein, putative, expressed
AT1G01090.1	2393	2489	2380	2498	0.0701889	pyruvate dehydrogenase E1 alpha	PDH-E1 ALPHA	PF02775	PTHR11516,PTHR11516:SF25		GO:0030976,GO:0003824	LOC_Os04g02900.1	dehydrogenase E1 component domain containing protein, expressed
AT1G01100.1	10	10	9	10	0.0117693	60S acidic ribosomal protein family		PF00428	PTHR21141	KOG1762		LOC_Os08g02340.1	60S acidic ribosomal protein, putative, expressed
AT1G01110.2	76	76	75	76	0.0228366	IQ-domain 18	IQD18	PF00612,PF13178	PTHR32295,PTHR32295:SF0		GO:0005515	LOC_Os08g02250.1	IQ calmodulin-binding motif domain containing protein, expressed
AT1G01120.1	2648	2680	2634	2691	0.0307771	3-ketoacyl-CoA synthase 1	KCS1	PF08541,PF08392	PTHR31561,PTHR31561:SF1		GO:0016747,GO:0008610,GO:0016020,GO:0006633	LOC_Os03g14170.1	3-ketoacyl-CoA synthase, putative, expressed
AT1G01130.1	61	69	60	69	0.203606	CBL-interacting Serine/Threonine-kinase			PTHR24347,PTHR24347:SF140			LOC_Os03g03510.1	CAMK_KIN1/SNF1/Nim1_like.15 - CAMK includes calcium/calmodulin depedent protein kinases, expressed
AT1G01140.3	326	204	324	205	-0.660771	CBL-interacting protein kinase 9	CIPK9	PF14531,PF03822	PTHR24347,PTHR24347:SF140	KOG0583	GO:0007165	LOC_Os03g03510.1	CAMK_KIN1/SNF1/Nim1_like.15 - CAMK includes calcium/calmodulin depedent protein kinases, expressed
AT1G01160.2	392	445	389	446	0.196642	GRF1-interacting factor 2	GIF2	PF05030	PTHR23107	KOG3227		LOC_Os11g40100.3	GRF-interacting factor 2, putative, expressed
AT1G01170.1	333	449	331	450	0.443046	ozone-responsive stress-like protein (DUF1138)		PF06592	PTHR34267,PTHR34267:SF1			LOC_Os06g02420.1	ATOZI1, putative, expressed
AT1G01180.1	27	36	27	36	0.428637	S-adenosyl-L-methionine-dependent methyltransferases superfamily protein		PF13578	PTHR10509,PTHR10509:SF17		GO:0008171	LOC_Os09g34320.1	expressed protein
AT1G01200.1	48	38	47	38	-0.32746	RAB GTPase homolog A3	RABA3	PF00025	PTHR24073,PTHR24073:SF345	KOG0087	GO:0005525	LOC_Os09g35860.1	ras-related protein, putative, expressed
AT1G01210.1	63	61	62	61	-0.0335108	DNA-directed RNA polymerase, subunit M, archaeal		PF02150,PF01096	PTHR11239,PTHR11239:SF12	KOG2906	GO:0006351,GO:0003899,GO:0003677,GO:0008270,GO:0003676	LOC_Os02g45120.2	expressed protein
AT1G01225.1	59	42	59	42	-0.476999	NC domain-containing protein-like protein		PF04970	PTHR13943,PTHR13943:SF32			LOC_Os09g35810.1	NC domain-containing protein, putative, expressed
AT1G01230.1	201	257	199	258	0.368758	ORMDL family protein		PF04061	PTHR12665,PTHR12665:SF14	KOG3319	GO:0016021,GO:0005789	LOC_Os07g26940.1	ORM1, putative, expressed
AT1G01240.1	103	155	102	155	0.59837	transmembrane protein			PTHR33868,PTHR33868:SF2			LOC_Os08g30930.1	expressed protein
AT1G01250.1	724	345	720	346	-1.05599	Integrase-type DNA-binding superfamily protein		PF00847	PTHR31985,PTHR31985:SF15		GO:0006355,GO:0003700	LOC_Os04g46400.1	AP2 domain containing protein, expressed
AT1G01260.1	201	184	199	184	-0.114329	basic helix-loop-helix (bHLH) DNA-binding superfamily protein		PF00010,PF14215	PTHR11514,PTHR11514:SF47		GO:0046983	LOC_Os01g50940.1	helix-loop-helix DNA-binding domain containing protein, expressed
AT1G01290.1	130	135	129	135	0.0626203	cofactor of nitrate reductase and xanthine dehydrogenase 3	CNX3	PF01967	PTHR22960	KOG2876	GO:0006777	LOC_Os04g38700.1	molybdopterin biosynthesis protein CNX3, putative, expressed
AT1G01300.1	2700	2862	2685	2873	0.0977571	Eukaryotic aspartyl protease family protein		PF00026	PTHR13683,PTHR13683:SF308	KOG1339	GO:0006508,GO:0004190	LOC_Os01g41550.1	aspartic proteinase, putative, expressed
AT1G01310.1	77	91	76	91	0.263845	CAP (Cysteine-rich secretory proteins, Antigen 5, and Pathogenesis-related 1 protein) superfamily protein		PF00188	PTHR10334,PTHR10334:SF204			LOC_Os05g51680.2	SCP-like extracellular protein, expressed
AT1G01320.1	3523	2183	3504	2191	-0.677372	Tetratricopeptide repeat (TPR)-like superfamily protein		PF15044,PF12807,PF13424	PTHR12601,PTHR12601:SF17			LOC_Os07g23990.1	tetratricopeptide repeat domain containing protein, putative, expressed
AT1G01340.2	15	2	14	2	-3.26133	cyclic nucleotide gated channel 10	CNGC10	PF00027,PF00520	PTHR10217,PTHR10217:SF465		GO:0055085,GO:0016020,GO:0006811,GO:0005216	LOC_Os06g33570.1	cyclic nucleotide-gated ion channel 1, putative, expressed
AT1G01350.1	199	193	198	194	-0.0307006	Zinc finger (CCCH-type/C3HC4-type RING finger) family protein		PF13920,PF00642	PTHR12930	KOG1813	GO:0046872	LOC_Os02g19804.1	Zinc finger C-x8-C-x5-C-x3-H type domain containing protein, expressed
AT1G01360.1	126	118	125	118	-0.0816033	regulatory component of ABA receptor 1	RCAR1	PF10604	PTHR31213,PTHR31213:SF4			LOC_Os02g15640.1	CAPIP1, putative, expressed
AT1G01420.2	30	26	30	26	-0.221114	UDP-glucosyl transferase 72B3	UGT72B3	PF00201	PTHR11926,PTHR11926:SF189		GO:0016758,GO:0008152	LOC_Os11g38650.1	UDP-glucoronosyl/UDP-glucosyl transferase, putative, expressed
AT1G01430.1	1041	1234	1035	1239	0.259491	TRICHOME BIREFRINGENCE-LIKE 25	TBL25	PF14416,PF13839	PTHR32285,PTHR32285:SF9			LOC_Os05g12380.1	expressed protein
AT1G01440.1	160	186	159	187	0.235281	hypothetical protein (DUF3133)		PF11331	PTHR31105,PTHR31105:SF3			LOC_Os01g43330.1	extra-large G-protein-related, putative, expressed
AT1G01450.1	86	85	86	85	-0.0123068	Protein kinase superfamily protein		PF07714	PTHR23257,PTHR23257:SF530	KOG0192	GO:0006468,GO:0004672	LOC_Os01g43350.1	protein kinase family protein, putative, expressed
AT1G01460.1	25	30	24	30	0.305378	Phosphatidylinositol-4-phosphate 5-kinase, core	PIPK11	PF01504	PTHR23086,PTHR23086:SF33	KOG0229	GO:0046488,GO:0016307	LOC_Os03g49800.1	phosphatidylinositol-4-phosphate 5-kinase, putative, expressed
AT1G01470.1	142	112	141	112	-0.323649	Late embryogenesis abundant protein	LEA14	PF03168	PTHR31459			LOC_Os01g12580.1	late embryogenesis abundant protein, putative, expressed
AT1G01480.1	44	29	43	29	-0.596534	1-amino-cyclopropane-1-carboxylate synthase 2	ACS2	PF00155	PTHR11751,PTHR11751:SF380		GO:0030170,GO:0009058	LOC_Os04g48850.1	aminotransferase, classes I and II, domain containing protein, expressed
AT1G01490.4	171	287	170	288	0.764718	Heavy metal transport/detoxification superfamily protein		PF00403	PTHR22814,PTHR22814:SF131	KOG1603	GO:0046872,GO:0030001	LOC_Os10g38870.1	heavy metal-associated domain containing protein, expressed
AT1G01500.1	71	98	70	98	0.481355	Erythronate-4-phosphate dehydrogenase family protein			PTHR10996,PTHR10996:SF166			LOC_Os03g56420.1	expressed protein
AT1G01510.1	591	523	587	525	-0.163064	NAD(P)-binding Rossmann-fold superfamily protein	AN	PF02826	PTHR10996,PTHR10996:SF134	KOG0067	GO:0055114,GO:0051287	LOC_Os10g38900.1	erythronate-4-phosphate dehydrogenase, putative, expressed
AT1G01520.1	9	6	9	6	-0.571088	Homeodomain-like superfamily protein	ASG4	PF00249	PTHR12802,PTHR12802:SF49	KOG0724		LOC_Os02g45670.1	myb-like DNA-binding domain containing protein, expressed
AT1G01530.1	25	23	24	23	-0.109445	AGAMOUS-like 28	AGL28	PF00319	PTHR11945,PTHR11945:SF230	KOG0014	GO:0046983,GO:0003677	LOC_Os09g02830.1	OsMADS78 - MADS-box family gene with M-alpha type-box, expressed
AT1G01540.2	593	878	590	881	0.579733	Protein kinase superfamily protein		PF00069	PTHR27001,PTHR27001:SF156	KOG1187	GO:0006468,GO:0005524,GO:0004672	LOC_Os03g03410.1	serine/threonine-protein kinase, putative, expressed
AT1G01550.1	140	133	139	133	-0.0607062	BPS1-like protein (DUF793)	BPS1	PF03087	PTHR31509,PTHR31509:SF3			LOC_Os10g36950.1	DUF677 domain containing protein, putative, expressed
AT1G01560.2	7	13	7	13	0.849662	MAP kinase 11	MPK11	PF00069	PTHR24055,PTHR24055:SF227		GO:0006468,GO:0005524,GO:0004672	LOC_Os08g06060.1	CGMC_MAPKCMGC_2_ERK.13 - CGMC includes CDA, MAPK, GSK3, and CLKC kinases, expressed
AT1G01570.2	25	24	25	24	-0.0454314	transferring glycosyl group transferase (DUF604)		PF02434	PTHR10811,PTHR10811:SF17	KOG2246	GO:0016757,GO:0016020	LOC_Os04g48950.1	fringe-related protein, putative, expressed
AT1G01590.1	161	105	160	105	-0.605733	ferric reduction oxidase 1	FRO1	PF01794,PF08022,PF08030	PTHR11972,PTHR11972:SF41	KOG0039	GO:0055114,GO:0016491	LOC_Os04g48930.4	ferric-chelate reductase, putative, expressed
AT1G01600.1	1189	1206	1183	1210	0.0333508	cytochrome P450, family 86, subfamily A, polypeptide 4	CYP86A4	PF00067	PTHR24296,PTHR24296:SF9	KOG0157	GO:0055114,GO:0020037,GO:0016705,GO:0005506	LOC_Os02g44654.2	cytochrome P450, putative, expressed
AT1G01610.1	2037	2054	2026	2062	0.0257678	glycerol-3-phosphate acyltransferase 4	GPAT4	PF01553	PTHR15486,PTHR15486:SF27		GO:0016746,GO:0008152	LOC_Os01g63580.1	glycerol-3-phosphate acyltransferase, putative, expressed
AT1G01620.1	4211	5480	4188	5502	0.393632	plasma membrane intrinsic protein 1C	PIP1C	PF00230	PTHR19139,PTHR19139:SF169	KOG0223	GO:0016020,GO:0006810,GO:0005215	LOC_Os04g47220.1	aquaporin protein, putative, expressed
AT1G01630.1	299	333	297	334	0.166666	Sec14p-like phosphatidylinositol transfer family protein		PF13716	PTHR10174,PTHR10174:SF145	KOG1470		LOC_Os03g63370.1	CRAL/TRIO domain containing protein, expressed
AT1G01640.1	27	20	26	20	-0.42884	BTB/POZ domain-containing protein		PF00651	PTHR24413,PTHR24413:SF0		GO:0005515	LOC_Os12g02030.1	BTB9 - Bric-a-Brac, Tramtrack, Broad Complex BTB domain, expressed
AT1G01650.1	260	258	258	259	0.00513456	SIGNAL PEPTIDE PEPTIDASE-LIKE 4	SPPL4	PF02225,PF04258	PTHR12174,PTHR12174:SF41		GO:0016021,GO:0004190	LOC_Os06g51430.1	signal peptide peptidase-like 2B, putative, expressed
AT1G01660.2	23	19	23	19	-0.262449	RING/U-box superfamily protein		PF04564	PTHR22849,PTHR22849:SF50		GO:0016567,GO:0004842	LOC_Os09g39640.1	protein kinase, putative, expressed
AT1G01670.1	8	6	8	6	-0.3997	RING/U-box superfamily protein		PF04564	PTHR22849,PTHR22849:SF43		GO:0016567,GO:0004842	LOC_Os02g57700.1	protein kinase, putative, expressed
AT1G01690.1	23	12	23	12	-0.98644	putative recombination initiation defects 3	PRD3		PTHR37695			LOC_Os03g01590.1	PAIR1, putative, expressed
AT1G01695.1	11	6	10	6	-0.794069	Phosphatidylinositol N-acetyglucosaminlytransferase subunit P-like protein	TRM33	PF14309	PTHR21726,PTHR21726:SF30			LOC_Os10g40250.2	expressed protein
AT1G01700.4	32	19	31	19	-0.754152	RHO guanyl-nucleotide exchange factor 2	ROPGEF2	PF03759	PTHR33101,PTHR33101:SF9		GO:0005089	LOC_Os10g40270.1	ATROPGEF7/ROPGEF7, putative, expressed
AT1G01710.1	422	407	419	408	-0.0388088	acyl-CoA thioesterase II		PF00027,PF02551	PTHR11066,PTHR11066:SF34	KOG3016	GO:0047617,GO:0006637	LOC_Os04g47120.1	acyl-CoA thioesterase 2, putative, expressed
AT1G01715.1	37	39	36	39	0.108945	hypothetical protein			PTHR36045,PTHR36045:SF1			LOC_Os04g47130.1	expressed protein
AT1G01720.1	574	258	570	259	-1.13899	NAC (No Apical Meristem) domain transcriptional regulator superfamily protein	ATAF1	PF02365	PTHR31719,PTHR31719:SF16		GO:0006355,GO:0003677	LOC_Os01g66120.1	No apical meristem protein, putative, expressed
AT1G01725.1	46	42	45	42	-0.102381	adenylosuccinate synthetase			PTHR37696,PTHR37696:SF1
AT1G01730.1	268	282	267	283	0.0843744	hypothetical protein			PTHR35459,PTHR35459:SF2			LOC_Os02g44540.3	expressed protein
AT1G01740.1	6	4	5	4	-0.446306	kinase with tetratricopeptide repeat domain-containing protein	BSK4	PF13414,PF07714	PTHR27001,PTHR27001:SF126	KOG1187	GO:0006468,GO:0004672	LOC_Os10g42110.1	protein kinase family protein, putative, expressed
AT1G01750.2	14	10	14	10	-0.471965	actin depolymerizing factor 11	ADF11	PF00241	PTHR11913,PTHR11913:SF30	KOG1735	GO:0005622,GO:0003779,GO:0030042,GO:0015629	LOC_Os02g44470.1	actin-depolymerizing factor, putative, expressed
AT1G01760.3	39	32	38	32	-0.276002	denosine deaminases acting on tRNA		PF02137	PTHR10910		GO:0006396,GO:0004000,GO:0003723	LOC_Os04g58690.3	tRNA-specific adenosine deaminase 1, putative, expressed
AT1G01770.1	218	183	217	184	-0.238813	propionyl-CoA carboxylase		PF07287	PTHR13943,PTHR13943:SF48			LOC_Os07g27350.1	atuA, putative, expressed
AT1G01780.1	175	174	174	175	0.00948357	GATA type zinc finger transcription factor family protein	PLIM2b	PF00412	PTHR24206,PTHR24206:SF22	KOG1700	GO:0008270	LOC_Os02g42820.1	OsPLIM2a - LIM domain protein, putative actin-binding protein and transcription factor, expressed
AT1G01790.1	690	360	686	361	-0.927165	K+ efflux antiporter 1	KEA1	PF02254,PF00999	PTHR16254,PTHR16254:SF13	KOG1650	GO:0006813,GO:0055085,GO:0016021,GO:0015299,GO:0006812	LOC_Os04g58620.1	potasium efflux antiporter protein, putative, expressed
AT1G01800.1	271	324	270	325	0.271042	NAD(P)-binding Rossmann-fold superfamily protein		PF00106	PTHR24322,PTHR24322:SF442	KOG1208	GO:0016491,GO:0008152	LOC_Os04g44950.1	short-chain dehydrogenase/reductase, putative, expressed
AT1G01810.1	10	15	10	15	0.549711	hypothetical protein
AT1G01820.1	342	348	340	349	0.0364869	peroxin 11c	PEX11C	PF05648	PTHR12652,PTHR12652:SF16	KOG4186	GO:0016559,GO:0005779	LOC_Os06g03660.2	peroxisomal biogenesis factor 11, putative, expressed
AT1G01830.1	33	13	32	13	-1.36317	ARM repeat superfamily protein		PF00514	PTHR23315,PTHR23315:SF97		GO:0005515	LOC_Os10g37850.1	armadillo, putative, expressed
AT1G01840.1	37	26	36	26	-0.475364	AP2-like ethylene-responsive transcription factor SNZ			PTHR37697
AT1G01860.4	57	53	57	53	-0.0920047	Ribosomal RNA adenine dimethylase family protein	PFC1	PF00398	PTHR11727,PTHR11727:SF11	KOG0820		LOC_Os02g03050.1	dimethyladenosine transferase, putative, expressed
AT1G01880.1	10	13	10	13	0.391233	5'-3' exonuclease family protein		PF00752,PF00867	PTHR11081,PTHR11081:SF23	KOG2519	GO:0006281,GO:0004518	LOC_Os09g35000.1	flap endonuclease, putative, expressed
AT1G01900.1	276	205	274	206	-0.412973	subtilase family protein	SBTI1.1	PF05922,PF02225,PF00082	PTHR10795,PTHR10795:SF387		GO:0006508,GO:0004252	LOC_Os04g48416.1	OsSub45 - Putative Subtilisin homologue, expressed
AT1G01910.1	333	280	331	281	-0.237169	P-loop containing nucleoside triphosphate hydrolases superfamily protein		PF01656	PTHR10803,PTHR10803:SF3	KOG2825	GO:0016887,GO:0005524	LOC_Os09g34970.1	arsenical pump-driving ATPase, putative, expressed
AT1G01920.1	198	185	197	186	-0.0844326	SET domain-containing protein		PF00856	PTHR13271,PTHR13271:SF41	KOG1337	GO:0005515	LOC_Os06g03676.1	CAMK_CAMK_like.6 - CAMK includes calcium/calmodulin depedent protein kinases, expressed
AT1G01930.1	138	178	137	179	0.385953	zinc finger protein-like protein			PTHR16036,PTHR16036:SF2			LOC_Os04g48520.1	ZOS4-12 - C2H2 zinc finger protein, expressed
AT1G01940.1	113	119	112	119	0.0886447	Cyclophilin-like peptidyl-prolyl cis-trans isomerase family protein		PF00160	PTHR11071	KOG0884	GO:0006457,GO:0003755,GO:0000413	LOC_Os06g04000.1	peptidyl-prolyl cis-trans isomerase, putative, expressed
AT1G01950.3	58	79	58	79	0.459326	armadillo repeat kinesin 2	ARK2	PF00514,PF00225	PTHR24115,PTHR24115:SF533	KOG0240	GO:0005515,GO:0008017,GO:0007018,GO:0005524,GO:0003777,GO:0005871	LOC_Os06g04560.1	kinesin motor domain containing protein, expressed
AT1G01960.1	1557	1196	1548	1201	-0.366637	SEC7-like guanine nucleotide exchange family protein	EDA10	PF16206,PF09324,PF12783,PF16213,PF01369	PTHR10663,PTHR10663:SF42		GO:0032012,GO:0005086	LOC_Os03g14260.1	guanine nucleotide exchange family protein, putative, expressed
AT1G01970.1	308	210	306	211	-0.539	Tetratricopeptide repeat (TPR)-like superfamily protein		PF13812,PF01535	PTHR24015,PTHR24015:SF457			LOC_Os07g46730.2	PPR repeat domain containing protein, putative, expressed
AT1G01980.1	202	238	200	238	0.250589	FAD-binding Berberine family protein		PF01565,PF08031	PTHR32448,PTHR32448:SF34	KOG1231	GO:0055114,GO:0050660,GO:0016491	LOC_Os06g35700.1	reticuline oxidase-like protein precursor, putative, expressed
AT1G01990.1	203	224	201	225	0.159005	hypothetical protein
AT1G02000.1	376	292	373	293	-0.35184	UDP-D-glucuronate 4-epimerase 2	GAE2	PF01073	PTHR10366,PTHR10366:SF319		GO:0055114,GO:0016616,GO:0006694,GO:0003854	LOC_Os02g54890.1	UDP-glucuronate 4-epimerase, putative, expressed
AT1G02010.4	18	14	17	14	-0.36104	secretory 1A	SEC1A	PF00995	PTHR11679,PTHR11679:SF38		GO:0016192,GO:0006904	LOC_Os02g25580.1	Sec1 family transport protein, putative, expressed
AT1G02020.1	257	204	256	205	-0.319778	nitroreductase family protein		PF00881	PTHR23026,PTHR23026:SF102			LOC_Os10g11340.1	nitroreductase family protein, putative, expressed
AT1G02030.1	6	1	6	1	-2.5715	C2H2-like zinc finger protein		PF13912	PTHR26374,PTHR26374:SF175			LOC_Os10g40660.1	ZOS10-07 - C2H2 zinc finger protein, expressed
AT1G02050.1	108	86	107	86	-0.31516	Chalcone and stilbene synthase family protein	LAP6	PF00195	PTHR11877,PTHR11877:SF25			LOC_Os10g34360.1	stilbene synthase, putative, expressed
AT1G02060.1	75	34	74	34	-1.13995	Tetratricopeptide repeat (TPR)-like superfamily protein		PF01535,PF13041	PTHR24015,PTHR24015:SF863			LOC_Os02g02950.1	pentatricopeptide, putative, expressed
AT1G02065.1	423	552	421	554	0.397526	squamosa promoter binding protein-like 8	SPL8	PF03110	PTHR31251,PTHR31251:SF4		GO:0005634,GO:0003677	LOC_Os06g44860.1	OsSPL10 - SBP-box gene family member, expressed
AT1G02067.1	102	148	101	149	0.550587	hypothetical protein
AT1G02070.1	18	21	18	21	0.235584	zinc ion-binding protein			PTHR33779,PTHR33779:SF2			LOC_Os04g46600.1	zinc finger protein, putative, expressed
AT1G02080.1	62	25	62	25	-1.32644	transcription regulator		PF16418,PF12842,PF16417,PF16415,PF04054	PTHR13162,PTHR13162:SF8			LOC_Os10g40780.1	CCR4-Not complex component, Not1domain containing protein, expressed
AT1G02090.1	136	188	135	188	0.476798	Proteasome component (PCI) domain protein	FUS5		PTHR15350	KOG3250		LOC_Os07g30840.2	proteasome subunit, putative, expressed
AT1G02100.1	127	138	126	139	0.139055	Leucine carboxyl methyltransferase	SBI1	PF04072	PTHR13600,PTHR13600:SF6	KOG2918	GO:0032259,GO:0008168	LOC_Os06g04820.1	leucine carboxyl methyltransferase 1, putative, expressed
AT1G02110.1	330	274	328	275	-0.257447	bZIP domain class transcription factor (DUF630 and DUF632)		PF04783,PF04782	PTHR21450,PTHR21450:SF9			LOC_Os09g36760.1	DUF630/DUF632 domains containing protein, putative, expressed
AT1G02120.1	871	825	866	828	-0.0640101	GRAM domain family protein	VAD1	PF02893,PF16016	PTHR23319	KOG1032		LOC_Os07g30940.1	expressed protein
AT1G02130.1	425	430	423	432	0.0302829	RAS 5	RA-5	PF00025	PTHR24073,PTHR24073:SF520	KOG0084	GO:0005525	LOC_Os01g08450.1	ras-related protein, putative, expressed
AT1G02140.1	788	908	784	912	0.217932	mago nashi family protein	MAGO	PF02792	PTHR12638	KOG3392	GO:0005634	LOC_Os12g18880.1	mago nashi, putative, expressed
AT1G02145.3	33	27	33	27	-0.302465	homolog of asparagine-linked glycosylation 12	ALG12	PF03901	PTHR22760,PTHR22760:SF1	KOG2516	GO:0016757	LOC_Os04g46050.1	Alg9-like mannosyltransferase protein, putative, expressed
AT1G02150.1	928	906	923	910	-0.0204067	Tetratricopeptide repeat (TPR)-like superfamily protein		PF13812,PF01535	PTHR24015,PTHR24015:SF27			LOC_Os04g46010.1	PPR repeat domain containing protein, putative, expressed
AT1G02160.2	184	267	183	268	0.548026	Cox19 family protein (CHCH motif)		PF06747	PTHR21588	KOG4618		LOC_Os03g48080.1	CHCH domain containing protein, expressed
AT1G02170.1	352	275	350	276	-0.34269	metacaspase 1	MC1	PF06943,PF00656	PTHR31773,PTHR31773:SF11	KOG1546	GO:0006508,GO:0004197	LOC_Os03g27210.1	LOL3, putative, expressed
AT1G02180.1	83	102	83	102	0.303742	ferredoxin-like protein			PTHR34537,PTHR34537:SF2			LOC_Os02g58740.1	expressed protein
AT1G02190.1	659	775	655	778	0.247511	Fatty acid hydroxylase superfamily		PF04116,PF12076	PTHR11863,PTHR11863:SF56		GO:0055114,GO:0016491,GO:0006633,GO:0005506	LOC_Os02g40784.1	WAX2, putative, expressed
AT1G02205.3	8005	6552	7961	6578	-0.275445	Fatty acid hydroxylase superfamily	CER1	PF04116,PF12076	PTHR11863,PTHR11863:SF41		GO:0055114,GO:0016491,GO:0006633,GO:0005506	LOC_Os10g33250.1	WAX2, putative, expressed
AT1G02220.1	32	21	31	21	-0.571559	NAC domain containing protein 3	NAC003	PF02365	PTHR31989,PTHR31989:SF5		GO:0006355,GO:0003677	LOC_Os08g06140.1	no apical meristem protein, putative, expressed
AT1G02230.1	10	9	10	9	-0.138541	NAC domain containing protein 4	NAC004	PF02365	PTHR31989,PTHR31989:SF5		GO:0006355,GO:0003677	LOC_Os08g06140.1	no apical meristem protein, putative, expressed
AT1G02260.1	148	126	147	127	-0.213847	Divalent ion symporter		PF02040	PTHR10283,PTHR10283:SF94		GO:0016021,GO:0015700,GO:0015105	LOC_Os03g05390.2	Citrate transporter protein, putative, expressed
AT1G02270.1	105	100	104	100	-0.0640947	Calcium-binding endonuclease/exonuclease/phosphatase family		PF03372	PTHR12121,PTHR12121:SF44	KOG2338		LOC_Os10g13550.1	endonuclease/exonuclease/phosphatase family domain containing protein, expressed
AT1G02280.1	193	192	191	192	0.00554964	translocon at the outer envelope membrane of chloroplasts 33	TOC33	PF01926	PTHR10903		GO:0005525	LOC_Os03g13730.1	translocase of chloroplast 34, putative, expressed
AT1G02290.1	95	95	94	95	0.0133035	hypothetical protein			PTHR13052,PTHR13052:SF1		GO:0031011	LOC_Os08g39120.1	expressed protein
AT1G02300.1	116	121	115	121	0.0684415	Cysteine proteinases superfamily protein		PF08127,PF00112	PTHR12411,PTHR12411:SF367	KOG1543	GO:0050790,GO:0004197,GO:0008234,GO:0006508	LOC_Os05g24550.5	Papain family cysteine protease domain containing protein, expressed
AT1G02305.1	1105	1111	1099	1115	0.0206821	Cysteine proteinases superfamily protein		PF08127,PF00112	PTHR12411,PTHR12411:SF367	KOG1543	GO:0050790,GO:0004197,GO:0008234,GO:0006508	LOC_Os05g24550.4	Papain family cysteine protease domain containing protein, expressed
AT1G02330.1	281	255	279	256	-0.124021	integrator complex subunit-like protein		PF07052	PTHR13486,PTHR13486:SF2	KOG3345		LOC_Os03g25720.1	GA20734-PA, putative, expressed
AT1G02335.1	148	145	147	146	-0.0161178	germin-like protein subfamily 2 member 2 precursor	GL22	PF07883	PTHR31238,PTHR31238:SF18			LOC_Os05g19670.1	Cupin domain containing protein, expressed
AT1G02340.1	35	32	35	32	-0.138376	basic helix-loop-helix (bHLH) DNA-binding superfamily protein	HFR1	PF00010	PTHR12565,PTHR12565:SF87		GO:0046983	LOC_Os07g05010.3	helix-loop-helix DNA-binding domain containing protein, expressed
AT1G02350.1	20	23	20	23	0.214849	protoporphyrinogen oxidase-like protein
AT1G02370.1	73	77	72	77	0.0908551	Tetratricopeptide repeat (TPR)-like superfamily protein		PF01535	PTHR24015,PTHR24015:SF504			LOC_Os01g19490.1	pentatricopeptide, putative, expressed
AT1G02380.1	25	28	25	28	0.176906	transmembrane protein			PTHR34188,PTHR34188:SF1			LOC_Os05g04150.1	expressed protein
AT1G02390.1	3	7	3	7	1.12938	glycerol-3-phosphate acyltransferase 2	GPAT2	PF01553	PTHR15486,PTHR15486:SF18		GO:0016746,GO:0008152	LOC_Os11g45400.1	glycerol-3-phosphate acyltransferase, putative, expressed
AT1G02400.1	7	4	7	4	-0.793893	gibberellin 2-oxidase 6	GA2OX6	PF14226,PF03171	PTHR10209,PTHR10209:SF183	KOG0143	GO:0055114,GO:0016491	LOC_Os05g06670.1	gibberellin 2-oxidase, putative, expressed
AT1G02405.1	12	10	12	10	-0.324471	proline-rich family protein
AT1G02410.1	59	55	59	55	-0.100548	cytochrome c oxidase assembly protein CtaG / Cox11 family		PF04442	PTHR21320,PTHR21320:SF3	KOG2540	GO:0005507	LOC_Os03g50940.1	cytochrome c oxidase assembly protein COX11, mitochondrial precursor, putative, expressed
AT1G02420.1	39	34	39	34	-0.205861	Pentatricopeptide repeat (PPR) superfamily protein		PF01535,PF13041	PTHR24015,PTHR24015:SF263			LOC_Os03g11020.1	PPR repeat containing protein, expressed
AT1G02430.1	20	18	20	18	-0.137854	ADP-ribosylation factor D1B	ARFD1B	PF09439	PTHR11711,PTHR11711:SF42	KOG0070		LOC_Os07g12170.1	ADP-ribosylation factor, putative, expressed
AT1G02450.1	28	15	27	15	-0.909653	NIM1-interacting 1	NIMIN1	PF15699	PTHR33669,PTHR33669:SF1
AT1G02460.1	55	25	55	25	-1.15307	Pectin lyase-like superfamily protein		PF12708	PTHR31375,PTHR31375:SF43			LOC_Os01g19170.1	polygalacturonase, putative, expressed
AT1G02470.1	7	5	6	5	-0.364197	Polyketide cyclase/dehydrase and lipid transport superfamily protein		PF03364	PTHR33824,PTHR33824:SF3			LOC_Os01g22510.1	cyclase/dehydrase family protein, expressed
AT1G02475.1	296	235	294	236	-0.319523	Polyketide cyclase/dehydrase and lipid transport superfamily protein		PF03364	PTHR33824,PTHR33824:SF3			LOC_Os01g22510.1	cyclase/dehydrase family protein, expressed
AT1G02500.1	6100	6242	6067	6267	0.0467997	S-adenosylmethionine synthetase 1	SAM1	PF00438,PF02772,PF02773	PTHR11964,PTHR11964:SF18		GO:0006556,GO:0004478,GO:0005524	LOC_Os01g22010.1	S-adenosylmethionine synthetase, putative, expressed
AT1G02520.1	21	32	20	32	0.632829	P-glycoprotein 11	ABCB11	PF00005,PF00664	PTHR24221,PTHR24221:SF205		GO:0016887,GO:0005524,GO:0055085,GO:0042626,GO:0016021,GO:0006810	LOC_Os01g18670.1	MDR-like ABC transporter, putative, expressed
AT1G02530.1	239	204	237	205	-0.21182	P-glycoprotein 12	ABCB12	PF00005,PF00664	PTHR24221,PTHR24221:SF205		GO:0016887,GO:0005524,GO:0055085,GO:0042626,GO:0016021,GO:0006810	LOC_Os01g18670.1	MDR-like ABC transporter, putative, expressed
AT1G02550.1	7	2	6	2	-2.1004	Plant invertase/pectin methylesterase inhibitor superfamily protein		PF04043	PTHR31707		GO:0004857	LOC_Os11g45220.1	IWS1 homolog A, putative, expressed
AT1G02560.1	1855	1711	1845	1718	-0.10278	nuclear encoded CLP protease 5	CLPP5	PF00574	PTHR10381,PTHR10381:SF12	KOG0840		LOC_Os03g19510.1	OsClp4 - Putative Clp protease homologue, expressed
AT1G02580.1	55	55	54	55	0.0267072	SET domain-containing protein	MEA	PF00856	PTHR22884,PTHR22884:SF326	KOG1079	GO:0005515	LOC_Os03g19480.1	SET domain containing protein, expressed
AT1G02610.1	4	10	3	10	1.52694	RING/FYVE/PHD zinc finger superfamily protein		PF12906,PF12428	PTHR23012,PTHR23012:SF93		GO:0008270	LOC_Os01g19800.1	zinc finger, C3HC4 type, putative, expressed
AT1G02620.1	3	6	2	6	1.15119	Ras-related small GTP-binding family protein		PF00025	PTHR11711,PTHR11711:SF170		GO:0005525	LOC_Os12g37360.1	miro, putative, expressed
AT1G02630.1	148	116	147	116	-0.333166	Nucleoside transporter family protein		PF01733	PTHR10332,PTHR10332:SF35	KOG1479	GO:0016021,GO:0006810,GO:0005337	LOC_Os08g10450.1	nucleoside transporter, putative, expressed
AT1G02640.1	879	1957	874	1964	1.16784	beta-xylosidase 2	BXL2	PF14310,PF00933,PF01915	PTHR30620,PTHR30620:SF4		GO:0005975,GO:0004553	LOC_Os11g44950.2	glycosyl hydrolase family 3 protein, putative, expressed
AT1G02650.1	9	7	9	7	-0.349921	Tetratricopeptide repeat (TPR)-like superfamily protein			PTHR22904,PTHR22904:SF7			LOC_Os03g19200.1	DNAJ heat shock N-terminal domain-containing protein, putative, expressed
AT1G02660.1	223	267	221	268	0.273759	alpha/beta-Hydrolases superfamily protein		PF01764	PTHR21493,PTHR21493:SF117		GO:0006629	LOC_Os01g15000.1	lipase, putative, expressed
AT1G02680.1	121	119	120	119	-0.0106788	TBP-associated factor 13	TAF13	PF02269	PTHR11380	KOG3901	GO:0006366	LOC_Os01g23630.1	transcription initiation factor IID, 18kD subunit family protein, expressed
AT1G02690.2	229	208	227	208	-0.125637	importin alpha isoform 6	IMPA-6	PF16186,PF01749,PF00514	PTHR23316,PTHR23316:SF29		GO:0008565,GO:0006606,GO:0005737,GO:0005634,GO:0005515	LOC_Os01g14950.1	importin subunit alpha, putative, expressed
AT1G02700.1	9	9	9	9	-0.0693346	GATA transcription factor-like protein			PTHR35985,PTHR35985:SF1			LOC_Os07g47840.1	expressed protein
AT1G02705.1	21	68	20	68	1.74348	hypothetical protein
AT1G02710.1	20	63	19	63	1.6939	glycine-rich protein
AT1G02720.1	221	253	219	253	0.208958	galacturonosyltransferase 5	GATL5	PF01501	PTHR13778,PTHR13778:SF8		GO:0016757	LOC_Os03g18890.1	glycosyl transferase 8 domain containing protein, putative, expressed
AT1G02730.1	580	338	576	339	-0.766489	cellulose synthase-like D5	CSLD5	PF13632,PF14570	PTHR13301,PTHR13301:SF58			LOC_Os12g36890.1	CSLD4 - cellulose synthase-like family D, expressed
AT1G02740.1	95	95	94	95	0.0209176	MRG family protein		PF11717,PF05712	PTHR10880,PTHR10880:SF33	KOG3001	GO:0016568,GO:0006355,GO:0005634	LOC_Os11g34305.1	transposon protein, putative, Mutator sub-class, expressed
AT1G02750.1	70	56	70	56	-0.321661	Drought-responsive family protein		PF14571,PF05605	PTHR31875,PTHR31875:SF5			LOC_Os05g28980.1	drought induced 19 protein, putative, expressed
AT1G02770.1	92	96	92	96	0.0746638	hypothetical protein		PF04776	PTHR31260,PTHR31260:SF28
AT1G02780.1	6141	7249	6107	7277	0.252791	Ribosomal protein L19e family protein	emb2386	PF01280	PTHR10722	KOG1696	GO:0006412,GO:0005840,GO:0005622,GO:0003735	LOC_Os03g38260.1	60S ribosomal protein L19-3, putative, expressed
AT1G02790.1	946	1080	941	1084	0.203896	polygalacturonase 4	PGA4	PF12708	PTHR31375,PTHR31375:SF17			LOC_Os06g35320.1	polygalacturonase, putative, expressed
AT1G02800.1	83	64	83	64	-0.372892	cellulase 2	CEL2	PF00759	PTHR22298,PTHR22298:SF55		GO:0005975,GO:0004553	LOC_Os01g21070.1	endoglucanase, putative, expressed
AT1G02810.1	203	118	201	118	-0.771729	Plant invertase/pectin methylesterase inhibitor superfamily		PF04043,PF01095	PTHR31707,PTHR31707:SF38		GO:0004857,GO:0042545,GO:0030599,GO:0005618	LOC_Os01g20980.1	pectinesterase, putative, expressed
AT1G02816.1	162	181	161	182	0.177938	pectinesterase (Protein of unknown function, DUF538)		PF04398	PTHR31676,PTHR31676:SF27			LOC_Os05g29900.1	expressed protein
AT1G02820.1	76	15	76	15	-2.32757	Late embryogenesis abundant 3 (LEA3) family protein	LEA3	PF03242	PTHR33509,PTHR33509:SF5		GO:0006950	LOC_Os01g21250.1	late embryogenesis abundant protein, putative, expressed
AT1G02840.1	276	381	274	382	0.481299	RNA-binding (RRM/RBD/RNP motifs) family protein	SR34	PF00076	PTHR24012,PTHR24012:SF487	KOG0105	GO:0003676	LOC_Os05g30140.1	RNA recognition motif containing protein, expressed
AT1G02850.4	21	14	21	14	-0.5715	beta glucosidase 11	BGLU11	PF00232	PTHR10353,PTHR10353:SF29		GO:0005975,GO:0004553	LOC_Os05g30350.1	Os5bglu22 - beta-glucosidase homologue, similar to G. max isohydroxyurate hydrolase, expressed
AT1G02860.1	10	36	10	36	1.8412	SPX (SYG1/Pho81/XPR1) domain-containing protein	NLA	PF13920	PTHR23041,PTHR23041:SF64			LOC_Os07g47590.2	expressed protein
AT1G02870.1	114	129	113	129	0.186142	nucleolar-like protein		PF09420	PTHR13243	KOG4771		LOC_Os05g30420.1	expressed protein
AT1G02880.6	44	37	44	37	-0.255755	thiamin pyrophosphokinase1	TPK1	PF04265,PF04263	PTHR13622,PTHR13622:SF6	KOG3153	GO:0030975,GO:0009229,GO:0005524,GO:0004788	LOC_Os01g70580.1	thiamin pyrophosphokinase 1, putative, expressed
AT1G02890.1	192	148	191	149	-0.361893	AAA-type ATPase family protein		PF05496	PTHR23074,PTHR23074:SF70		GO:0009378,GO:0006310,GO:0006281	LOC_Os11g43970.1	AAA-type ATPase family protein, putative, expressed
AT1G02900.1	7	9	7	9	0.376032	rapid alkalinization factor 1	RALF1	PF05498	PTHR33136,PTHR33136:SF5			LOC_Os12g35670.1	RALFL4 - Rapid ALkalinization Factor RALF family protein precursor, expressed
AT1G02910.1	387	338	385	339	-0.181766	tetratricopeptide repeat (TPR)-containing protein	LPA1	PF13414,PF11998	PTHR17130,PTHR17130:SF20			LOC_Os01g25600.1	tetratricopeptide repeat domain containing protein, expressed
AT1G02920.1	63	83	63	83	0.411515	glutathione S-transferase 7	GSTF7	PF00043,PF02798	PTHR11260,PTHR11260:SF201	KOG0867	GO:0005515	LOC_Os01g27340.1	glutathione S-transferase, putative, expressed
AT1G02930.1	2817	3624	2801	3638	0.376923	glutathione S-transferase 6	GSTF6	PF00043,PF02798	PTHR11260,PTHR11260:SF201	KOG0867	GO:0005515	LOC_Os01g27340.1	glutathione S-transferase, putative, expressed
AT1G02940.2	218	250	216	250	0.211262	glutathione S-transferase (class phi) 5	GSTF5	PF00043,PF02798	PTHR11260,PTHR11260:SF201	KOG0867	GO:0005515	LOC_Os01g70770.1	glutathione S-transferase, putative, expressed
AT1G02950.5	126	79	125	79	-0.663511	glutathione S-transferase F4	GSTF4	PF00043,PF02798	PTHR11260,PTHR11260:SF201	KOG0867	GO:0005515	LOC_Os01g70770.1	glutathione S-transferase, putative, expressed
AT1G02960.2	37	45	37	45	0.279395	kinetochore protein			PTHR35686,PTHR35686:SF1			LOC_Os02g48116.1	expressed protein
AT1G02970.1	39	35	38	35	-0.145095	WEE1-like kinase	WEE1	PF07714	PTHR11042,PTHR11042:SF69		GO:0006468,GO:0004672	LOC_Os02g04240.1	wee1-like protein kinase, putative, expressed
AT1G02980.1	40	22	40	22	-0.849478	cullin 2	CUL2	PF10557,PF00888	PTHR11932,PTHR11932:SF72	KOG2167	GO:0031625,GO:0006511	LOC_Os01g27150.1	cullin, putative, expressed
AT1G02990.3	215	158	213	159	-0.427579	hypothetical protein			PTHR23336,PTHR23336:SF14			LOC_Os07g47360.2	CW-type Zinc Finger, putative, expressed
AT1G03000.1	358	301	356	302	-0.237062	peroxin 6	PEX6	PF05496,PF00004	PTHR23077,PTHR23077:SF9		GO:0009378,GO:0006310,GO:0006281,GO:0005524	LOC_Os04g52690.3	AAA family ATPase, putative, expressed
AT1G03010.1	6	3	5	3	-0.861893	Phototropic-responsive NPH3 family protein		PF00651,PF03000	PTHR32370,PTHR32370:SF30		GO:0005515	LOC_Os03g22600.1	BTBN6 - Bric-a-Brac, Tramtrack, Broad Complex BTB domain with non-phototropic hypocotyl 3 NPH3 and coiled-coil domains, expressed
AT1G03030.1	58	60	58	60	0.0501878	P-loop containing nucleoside triphosphate hydrolases superfamily protein		PF00485	PTHR10285,PTHR10285:SF81	KOG2702	GO:0016301,GO:0008152,GO:0005524	LOC_Os12g40880.1	phosphoribulokinase/Uridine kinase family protein, expressed
AT1G03040.3	800	738	796	740	-0.103951	basic helix-loop-helix (bHLH) DNA-binding superfamily protein		PF00010	PTHR16223,PTHR16223:SF15		GO:0046983	LOC_Os03g58330.1	BHLH transcription factor, putative, expressed
AT1G03050.1	148	180	147	181	0.300865	ENTH/ANTH/VHS superfamily protein		PF07651	PTHR22951,PTHR22951:SF12	KOG0251	GO:0005543	LOC_Os05g35160.1	clathrin assembly protein, putative, expressed
AT1G03055.1	21	17	21	17	-0.33481	beta-carotene isomerase D27-like protein	D27	PF13225	PTHR33591,PTHR33591:SF3			LOC_Os08g02210.1	expressed protein
AT1G03060.1	367	171	365	171	-1.09252	BEACH-DOMAIN HOMOLOG A1	SPI	PF00400,PF14844,PF02138	PTHR13743,PTHR13743:SF84		GO:0005515	LOC_Os03g53280.1	WD domain containing protein, putative, expressed
AT1G03070.1	8	5	8	5	-0.66735	Bax inhibitor-1 family protein		PF01027	PTHR23291,PTHR23291:SF31	KOG2322		LOC_Os03g53400.1	transmembrane BAX inhibitor motif-containing protein, putative, expressed
AT1G03080.1	391	494	388	495	0.351124	kinase interacting (KIP1-like) family protein	NET1D	PF07765	PTHR32258,PTHR32258:SF0	KOG0993,KOG1003,KOG4421,KOG0999,KOG4787,KOG0978,KOG4809,KOG0971,KOG0963,KOG4593		LOC_Os10g28610.1	KIP1, putative, expressed
AT1G03090.2	31	19	30	19	-0.669651	methylcrotonyl-CoA carboxylase alpha chain	MCCA	PF00364,PF13535,PF02785,PF00289	PTHR18866			LOC_Os12g41250.1	methylcrotonoyl-CoA carboxylase subunit alpha, mitochondrial precursor, putative, expressed
AT1G03100.1	31	31	31	31	-0.00971687	Pentatricopeptide repeat (PPR) superfamily protein		PF01535,PF13041	PTHR24015,PTHR24015:SF528			LOC_Os10g28665.2	PPR repeat domain containing protein, putative, expressed
AT1G03103.1	9	2	9	2	-2.15646	Bifunctional inhibitor/lipid-transfer protein/seed storage 2S albumin superfamily protein		PF14368	PTHR33044,PTHR33044:SF23			LOC_Os07g07930.1	LTPL78 - Protease inhibitor/seed storage/LTP family protein precursor, expressed
AT1G03110.1	136	138	135	138	0.0344973	Transducin/WD40 repeat-like superfamily protein	TRM82	PF00400	PTHR16288,PTHR16288:SF0	KOG3914	GO:0005515	LOC_Os03g53530.1	WD domain, G-beta repeat domain containing protein, expressed
AT1G03120.1	22	6	22	6	-1.98585	responsive to abscisic acid 28	RAB28	PF04927	PTHR31174,PTHR31174:SF3			LOC_Os06g23350.1	late embryogenesis abundant protein D-34, putative, expressed
AT1G03130.1	4623	5598	4598	5620	0.289702	photosystem I subunit D-2	PSAD-2	PF02531	PTHR31982,PTHR31982:SF4		GO:0015979,GO:0009538,GO:0009522	LOC_Os08g44680.1	photosystem I reaction center subunit II, chloroplast precursor, putative, expressed
AT1G03140.1	406	474	403	475	0.23715	splicing factor Prp18 family protein		PF08799,PF02840	PTHR13007,PTHR13007:SF19	KOG2808	GO:0008380,GO:0005681	LOC_Os07g38420.1	pre-mRNA-splicing factor, putative, expressed
AT1G03150.1	126	161	125	161	0.362559	Acyl-CoA N-acyltransferases (NAT) superfamily protein		PF00583	PTHR23091,PTHR23091:SF71	KOG3234	GO:0008080	LOC_Os03g49230.1	acetyltransferase, GNAT family, putative, expressed
AT1G03160.1	210	140	209	141	-0.571272	FZO-like protein	FZL	PF02581,PF01926	PTHR11649,PTHR11649:SF36		GO:0009228,GO:0004789,GO:0005525	LOC_Os05g32390.1	FZL, putative, expressed
AT1G03170.1	545	599	542	601	0.149711	FANTASTIC four-like protein (DUF3049)	FAF2	PF11250	PTHR33155,PTHR33155:SF3			LOC_Os03g49830.1	expressed protein
AT1G03180.1	13	4	13	4	-1.68982	non-structural protein			PTHR15681,PTHR15681:SF1			LOC_Os05g16250.1	expressed protein
AT1G03190.1	47	39	46	39	-0.258808	RAD3-like DNA-binding helicase protein	UVH6	PF04851,PF06777,PF13307	PTHR11472,PTHR11472:SF1		GO:0016787,GO:0005524,GO:0003677,GO:0005634,GO:0016818,GO:0008026,GO:0006139,GO:0003676	LOC_Os05g05260.1	helicase, putative, expressed
AT1G03200.1	15	18	15	18	0.275617	hypothetical protein
AT1G03210.2	76	73	76	73	-0.0547226	Phenazine biosynthesis PhzC/PhzF protein		PF02567	PTHR13774,PTHR13774:SF17	KOG3033	GO:0009058,GO:0003824	LOC_Os01g16146.1	phenazine biosynthesis protein, putative, expressed
AT1G03220.1	74	185	74	186	1.3353	Eukaryotic aspartyl protease family protein		PF14543,PF14541	PTHR13683,PTHR13683:SF379	KOG1339	GO:0006508,GO:0004190	LOC_Os05g33400.1	basic 7S globulin precursor, putative, expressed
AT1G03230.1	40	48	40	48	0.261569	Eukaryotic aspartyl protease family protein		PF14543,PF14541	PTHR13683,PTHR13683:SF379	KOG1339	GO:0006508,GO:0004190	LOC_Os05g33400.1	basic 7S globulin precursor, putative, expressed
AT1G03250.2	225	228	224	229	0.032654	R3H domain protein		PF13902	PTHR32019,PTHR32019:SF2			LOC_Os12g05000.1	expressed protein
AT1G03260.1	124	120	123	120	-0.0280293	SNARE associated Golgi protein family		PF09335	PTHR12677	KOG3140		LOC_Os07g46220.1	SNARE associated Golgi protein, putative, expressed
AT1G03270.1	70	58	69	58	-0.259966	CBS domain protein with a domain protein (DUF21)		PF01595	PTHR12064,PTHR12064:SF33	KOG2118		LOC_Os05g32850.1	CBS domain containing protein, expressed
AT1G03280.1	24	26	24	26	0.100814	Transcription factor TFIIE, alpha subunit		PF02002	PTHR13097,PTHR13097:SF7	KOG2593		LOC_Os08g25460.1	transcription initiation factor, putative, expressed
AT1G03290.1	525	554	522	556	0.0910704	ELKS/Rab6-interacting/CAST family protein			PTHR16223,PTHR16223:SF12			LOC_Os10g16440.1	CUE domain containing protein, expressed
AT1G03300.1	136	197	135	198	0.553237	agenet domain protein (DOMAIN OF UNKNOWN FUNCTION 724 1)	ATDUF1	PF05641,PF05266	PTHR31917,PTHR31917:SF20			LOC_Os05g04180.1	agenet domain containing protein, putative, expressed
AT1G03310.1	12	5	12	5	-1.25102	debranching enzyme 1	DBE1	PF00128,PF02922	PTHR10357,PTHR10357:SF115		GO:0043169,GO:0005975,GO:0003824,GO:0004553	LOC_Os05g32710.1	Alpha amylase, catalytic domain containing protein, expressed
AT1G03330.1	224	235	223	236	0.0825505	Small nuclear ribonucleoprotein family protein	LSM2	PF01423	PTHR13829	KOG3448	GO:0006397	LOC_Os01g15310.1	LSM domain containing protein, expressed
AT1G03340.1	9	6	9	6	-0.5715	hypothetical protein			PTHR35095			LOC_Os05g05140.2	expressed protein
AT1G03350.1	577	663	574	665	0.212846	BSD domain-containing protein		PF03909	PTHR16019,PTHR16019:SF7	KOG2690		LOC_Os01g16670.1	BSD domain-containing protein, putative, expressed
AT1G03360.1	95	72	94	72	-0.396601	ribosomal RNA processing 4	RRP4	PF15985	PTHR21321,PTHR21321:SF4	KOG3013	GO:0003723,GO:0000178	LOC_Os04g43922.1	exosome complex exonuclease rrp4, putative, expressed
AT1G03365.1	246	209	244	209	-0.222365	RING/U-box superfamily protein		PF13920	PTHR10044,PTHR10044:SF98	KOG4172		LOC_Os05g04950.1	protein binding protein, putative, expressed
AT1G03370.1	66	40	66	40	-0.708551	C2 calcium/lipid-binding and GRAM domain containing protein		PF02893,PF00168,PF16016	PTHR10774,PTHR10774:SF90		GO:0005515	LOC_Os06g19400.1	GRAM and C2 domains containing protein, putative, expressed
AT1G03380.1	336	210	334	210	-0.668067	yeast autophagy 18 G-like protein	ATG18G	PF12490	PTHR13268,PTHR13268:SF2	KOG2109		LOC_Os05g33610.1	expressed protein
AT1G03400.2	77	57	77	57	-0.420486	2-oxoglutarate (2OG) and Fe(II)-dependent oxygenase superfamily protein		PF14226,PF03171	PTHR10209,PTHR10209:SF122	KOG0143	GO:0055114,GO:0016491	LOC_Os03g48430.1	1-aminocyclopropane-1-carboxylate oxidase homolog 4, putative, expressed
AT1G03410.1	411	424	408	425	0.0584132	2-oxoglutarate (2OG) and Fe(II)-dependent oxygenase superfamily protein	2A6	PF14226,PF03171	PTHR10209,PTHR10209:SF122	KOG0143	GO:0055114,GO:0016491	LOC_Os03g48430.1	1-aminocyclopropane-1-carboxylate oxidase homolog 4, putative, expressed
AT1G03430.1	35	27	35	27	-0.388216	histidine-containing phosphotransfer factor 5	AHP5	PF01627	PTHR28242,PTHR28242:SF9	KOG4747	GO:0004871,GO:0000160	LOC_Os08g44350.1	histidine-containing phosphotransfer protein, putative, expressed
AT1G03440.1	189	164	187	165	-0.187516	Leucine-rich repeat (LRR) family protein		PF08263,PF00560	PTHR27000,PTHR27000:SF105		GO:0005515	LOC_Os05g33690.1	receptor-like protein kinase precursor, putative, expressed
AT1G03445.1	15	14	15	14	-0.0868864	Serine/threonine protein phosphatase family protein	BSU1	PF16891,PF13415,PF00149	PTHR11668,PTHR11668:SF228	KOG0374	GO:0016787,GO:0009742,GO:0004721	LOC_Os05g05240.1	serine/threonine protein phosphatase, putative, expressed
AT1G03457.2	9	15	8	15	0.784787	RNA-binding (RRM/RBD/RNP motifs) family protein		PF00076	PTHR24012,PTHR24012:SF414	KOG0144	GO:0003676	LOC_Os01g71200.1	RNA recognition motif containing protein, putative, expressed
AT1G03470.1	30	47	30	47	0.661403	Kinase interacting (KIP1-like) family protein	NET3A	PF07765	PTHR32258			LOC_Os07g47090.1	KIP1, putative, expressed
AT1G03475.1	1441	1367	1433	1372	-0.0625694	Coproporphyrinogen III oxidase	LIN2	PF01218	PTHR10755,PTHR10755:SF7		GO:0055114,GO:0006779,GO:0004109	LOC_Os04g52130.1	coproporphyrinogen III oxidase, chloroplast precursor, putative, expressed
AT1G03495.1	57	78	56	78	0.469485	HXXXD-type acyl-transferase family protein		PF02458	PTHR31625,PTHR31625:SF2		GO:0016747	LOC_Os02g57480.1	transferase family protein, putative, expressed
AT1G03510.1	29	11	28	11	-1.4269	Tetratricopeptide repeat (TPR)-like superfamily protein		PF01535,PF13041	PTHR24015,PTHR24015:SF630			LOC_Os03g63510.1	pentatricopeptide, putative, expressed
AT1G03520.1	217	173	215	173	-0.314465	Core-2/I-branching beta-1,6-N-acetylglucosaminyltransferase family protein		PF02485	PTHR19297,PTHR19297:SF84	KOG0799	GO:0016020,GO:0008375	LOC_Os08g04790.1	xylosyltransferase, putative, expressed
AT1G03530.1	174	144	173	144	-0.264551	nuclear assembly factor 1	NAF1	PF04410	PTHR31633	KOG2236	GO:0042254,GO:0001522	LOC_Os05g42300.1	NAF1 domain containing protein, expressed
AT1G03540.1	20	14	19	14	-0.517358	Pentatricopeptide repeat (PPR-like) superfamily protein		PF01535,PF13041	PTHR24015,PTHR24015:SF328			LOC_Os06g40860.1	pentatricopeptide, putative, expressed
AT1G03550.1	57	43	56	43	-0.396761	Secretory carrier membrane protein (SCAMP) family protein	SCAMP4	PF04144	PTHR10687,PTHR10687:SF17	KOG3088	GO:0016021,GO:0015031	LOC_Os07g37740.1	secretory carrier-associated membrane protein, putative, expressed
AT1G03560.1	122	108	121	108	-0.169214	Pentatricopeptide repeat (PPR-like) superfamily protein		PF01535,PF13041	PTHR24015,PTHR24015:SF372			LOC_Os07g30930.1	pentatricopeptide repeat domain containing protein, putative, expressed
AT1G03590.1	620	898	616	901	0.548313	Protein phosphatase 2C family protein		PF00481	PTHR13832,PTHR13832:SF193	KOG0698	GO:0003824,GO:0006470,GO:0004722	LOC_Os07g37890.1	protein phosphatase 2C, putative, expressed
AT1G03600.1	2122	2256	2111	2265	0.101776	photosystem II family protein	PSB27	PF13326	PTHR34041,PTHR34041:SF1		GO:0010207	LOC_Os03g21560.1	photosystem II 11 kD protein, putative, expressed
AT1G03610.1	188	123	187	123	-0.598585	plant/protein (DUF789)		PF05623	PTHR31343,PTHR31343:SF3			LOC_Os10g35150.1	expressed protein
AT1G03620.12	9	22	8	22	1.35411	ELMO/CED-12 family protein		PF04727	PTHR12771,PTHR12771:SF17	KOG2998		LOC_Os04g01150.1	ELMO/CED-12 family protein, putative, expressed
AT1G03630.1	1457	1148	1449	1152	-0.330483	protochlorophyllide oxidoreductase C	POR C	PF00106	PTHR24322,PTHR24322:SF393	KOG1208	GO:0016491,GO:0008152	LOC_Os10g35370.1	oxidoreductase, short chain dehydrogenase/reductase family domain containing family, expressed
AT1G03650.1	14	17	14	17	0.29357	Acyl-CoA N-acyltransferases (NAT) superfamily protein		PF00583	PTHR23091,PTHR23091:SF255	KOG3139	GO:0008080	LOC_Os10g35680.1	acetyltransferase, GNAT family, putative, expressed
AT1G03660.1	9	17	9	17	0.887759	Ankyrin-repeat containing protein		PF13962				LOC_Os09g15950.1	expressed protein
AT1G03680.1	1937	2032	1927	2040	0.0825317	thioredoxin M-type 1	THM1	PF13098	PTHR10438,PTHR10438:SF300	KOG0910	GO:0045454,GO:0015035,GO:0006662	LOC_Os04g44830.1	thioredoxin, putative, expressed
AT1G03687.1	88	83	88	83	-0.0800264	DTW domain-containing protein		PF03942	PTHR21392,PTHR21392:SF4			LOC_Os06g23504.2	DTW domain containing protein, putative, expressed
AT1G03710.1	274	327	273	328	0.268699	Cystatin/monellin superfamily protein		PF00031	PTHR31228,PTHR31228:SF12		GO:0004869
AT1G03720.1	5	4	5	4	-0.501924	Cysteine proteinases superfamily protein		PF00112	PTHR12411	KOG1543	GO:0008234,GO:0006508	LOC_Os11g14900.4	thiol protease SEN102 precursor, putative, expressed
AT1G03730.1	93	108	93	108	0.22247	pyrroline-5-carboxylate reductase			PTHR34656,PTHR34656:SF1			LOC_Os12g19860.1	expressed protein
AT1G03740.1	157	159	156	159	0.0272694	Protein kinase superfamily protein		PF00069	PTHR24056,PTHR24056:SF202		GO:0006468,GO:0005524,GO:0004672	LOC_Os01g10430.1	protein kinase family protein, putative, expressed
AT1G03750.1	92	78	92	78	-0.233825	switch 2	SWI2	PF04851,PF00271	PTHR10799,PTHR10799:SF65		GO:0016787,GO:0005524,GO:0003677	LOC_Os05g15890.1	SNF2 family N-terminal domain containing protein, expressed
AT1G03760.1	84	80	83	80	-0.0571407	Prefoldin chaperone subunit family protein		PF02996	PTHR15111,PTHR15111:SF0			LOC_Os01g70330.1	prefoldin subunit family protein, expressed
AT1G03770.2	42	64	41	64	0.62657	RING 1B	RING1B	PF00097	PTHR10825,PTHR10825:SF43	KOG0311	GO:0046872	LOC_Os05g41795.1	zinc finger C3HC4 type family protein, putative, expressed
AT1G03780.3	51	41	50	41	-0.287724	targeting protein for XKLP2	TPX2	PF06886,PF12214	PTHR14326,PTHR14326:SF17		GO:0060236,GO:0032147,GO:0005874,GO:0005819	LOC_Os07g32390.1	targeting protein-related, putative, expressed
AT1G03800.1	19	15	18	15	-0.337914	ERF domain protein 10	ERF10	PF00847	PTHR31677		GO:0006355,GO:0003700	LOC_Os01g12440.1	AP2 domain containing protein, expressed
AT1G03820.1	559	276	555	277	-1.00606	E6-like protein			PTHR35274
AT1G03830.2	99	110	98	110	0.158703	guanylate-binding family protein		PF02263,PF02841	PTHR10751,PTHR10751:SF2	KOG2037	GO:0005525,GO:0003924	LOC_Os02g20410.1	GTP binding protein, putative, expressed
AT1G03840.1	3	10	2	10	2.0142	C2H2 and C2HC zinc fingers superfamily protein	MGP		PTHR10593,PTHR10593:SF26			LOC_Os01g14010.1	ZOS1-05 - C2H2 zinc finger protein, expressed
AT1G03850.1	10	14	9	14	0.520017	Glutaredoxin family protein	GRXS13	PF00462	PTHR10168,PTHR10168:SF111	KOG1752	GO:0045454,GO:0015035,GO:0009055	LOC_Os01g47760.1	OsGrx_I1 - glutaredoxin subgroup III, expressed
AT1G03860.1	222	236	221	237	0.101569	prohibitin 2	PHB2	PF01145	PTHR23222,PTHR23222:SF1		GO:0016020	LOC_Os03g62490.1	prohibitin-2, putative, expressed
AT1G03870.1	492	1802	489	1809	1.88597	FASCICLIN-like arabinoogalactan 9	FLA9	PF02469	PTHR32077,PTHR32077:SF6			LOC_Os01g47780.1	fasciclin domain containing protein, expressed
AT1G03880.1	285	19	283	19	-3.93208	cruciferin 2	CRU2	PF00190	PTHR31189,PTHR31189:SF1		GO:0045735	LOC_Os01g55690.1	glutelin, putative, expressed
AT1G03890.1	40	4	39	4	-3.48373	RmlC-like cupins superfamily protein		PF00190	PTHR31189,PTHR31189:SF1		GO:0045735	LOC_Os08g03410.1	glutelin, putative, expressed
AT1G03900.1	841	970	836	974	0.220138	non-intrinsic ABC protein 4	ABCI18	PF07933	PTHR12847,PTHR12847:SF3	KOG2500	GO:0016020,GO:0006897	LOC_Os10g33630.2	adaptin ear-binding coat-associated protein 2, putative, expressed
AT1G03910.2	529	424	526	425	-0.307437	cactus-binding carboxy-terminal, cactin		PF10312,PF09732	PTHR21737,PTHR21737:SF4		GO:0005515	LOC_Os03g58590.1	expressed protein
AT1G03920.1	46	62	45	62	0.460099	Protein kinase family protein		PF00433,PF07714	PTHR24356,PTHR24356:SF164		GO:0006468,GO:0005524,GO:0004674,GO:0004672	LOC_Os05g43570.1	AGC_AGC_other_NDRh_TRCd.2 - ACG kinases include homologs to PKA, PKG and PKC, expressed
AT1G03930.1	373	469	371	471	0.343875	dual specificity kinase 1	ADK1	PF00069	PTHR11909,PTHR11909:SF114		GO:0006468,GO:0005524,GO:0004672	LOC_Os02g56560.1	CK1_CaseinKinase_1.6 - CK1 includes the casein kinase 1 kinases, expressed
AT1G03940.1	102	95	101	95	-0.0819033	HXXXD-type acyl-transferase family protein		PF02458	PTHR31625,PTHR31625:SF2		GO:0016747	LOC_Os02g57480.1	transferase family protein, putative, expressed
AT1G03950.1	129	81	128	81	-0.652285	vacuolar protein sorting-associated protein 2.3	VPS2.3	PF03357	PTHR10476,PTHR10476:SF15	KOG3230	GO:0007034	LOC_Os10g33660.1	SNF7 domain containing protein, putative, expressed
AT1G03960.1	22	16	22	16	-0.445988	Calcium-binding EF hand family protein		PF13499	PTHR14095,PTHR14095:SF6			LOC_Os10g33680.1	serine/threonine-protein phosphatase 2A regulatory subunit B subunitbeta, putative, expressed
AT1G03970.1	288	330	286	331	0.209907	G-box binding factor 4	GBF4	PF00170	PTHR22952,PTHR22952:SF184		GO:0043565,GO:0006355,GO:0003700	LOC_Os01g64730.1	bZIP transcription factor domain containing protein, expressed
AT1G03990.1	66	46	65	46	-0.512257	Long-chain fatty alcohol dehydrogenase family protein		PF13450,PF05199	PTHR10668,PTHR10668:SF81		GO:0055114,GO:0016614	LOC_Os02g40840.1	alcohol oxidase, putative, expressed
AT1G04000.1	437	629	435	631	0.53771	hypothetical protein			PTHR34657,PTHR34657:SF2			LOC_Os04g43310.1	expressed protein
AT1G04010.1	227	164	226	164	-0.460178	phospholipid sterol acyl transferase 1	PSAT1	PF02450	PTHR11440,PTHR11440:SF7	KOG2369	GO:0008374,GO:0006629	LOC_Os02g56910.1	lecithine cholesterol acyltransferase, putative, expressed
AT1G04020.1	70	68	70	68	-0.0286089	breast cancer associated RING 1	BARD1	PF13920,PF13771,PF00533	PTHR13763			LOC_Os04g43300.1	BRCA1 C Terminus domain containing protein, expressed
AT1G04030.1	122	427	121	429	1.82676	eisosome protein			PTHR33318,PTHR33318:SF4			LOC_Os04g43230.1	expressed protein
AT1G04040.1	235	957	234	960	2.03858	HAD superfamily, subfamily IIIB acid phosphatase		PF03767	PTHR31284,PTHR31284:SF15		GO:0003993	LOC_Os06g04790.1	HAD superfamily phosphatase, putative, expressed
AT1G04050.1	4	7	3	7	0.90733	histone-lysine N-methyltransferase SUVR2-like protein	SUVR1	PF05033,PF00856,PF10440	PTHR22884,PTHR22884:SF366	KOG1082	GO:0034968,GO:0018024,GO:0008270,GO:0005634,GO:0005515	LOC_Os02g40770.1	SET domain containing protein, expressed
AT1G04070.1	130	160	129	161	0.313001	translocase of outer membrane 22-I	TOM22-I		PTHR12504	KOG4111		LOC_Os02g29400.1	expressed protein
AT1G04080.3	247	223	246	224	-0.134241	Tetratricopeptide repeat (TPR)-like superfamily protein	PRP39		PTHR17204,PTHR17204:SF5			LOC_Os03g11200.1	pre-mRNA-processing factor 39, putative, expressed
AT1G04090.1	20	19	19	19	-0.0628529	vacuolar sorting-associated protein (DUF946)		PF06101	PTHR17204,PTHR17204:SF30			LOC_Os03g04930.1	expressed protein
AT1G04100.1	57	43	57	43	-0.410173	indoleacetic acid-induced protein 10	IAA10	PF02309	PTHR31734,PTHR31734:SF6		GO:0006355,GO:0005634	LOC_Os02g57250.1	OsIAA10 - Auxin-responsive Aux/IAA gene family member, expressed
AT1G04105.1	29	16	29	16	-0.890011	hypothetical protein
AT1G04110.1	19	19	19	19	-0.0251656	Subtilase family protein	SDD1	PF02225,PF05922,PF00082	PTHR10795,PTHR10795:SF350		GO:0006508,GO:0004252	LOC_Os03g04950.1	OsSub26 - Putative Subtilisin homologue, expressed
AT1G04120.1	388	298	385	299	-0.365579	multidrug resistance-associated protein 5	ABCC5	PF00005,PF00664	PTHR24223,PTHR24223:SF189		GO:0016887,GO:0005524,GO:0055085,GO:0042626,GO:0016021,GO:0006810	LOC_Os03g04920.1	multidrug resistance-associated protein, putative, expressed
AT1G04130.1	99	95	98	95	-0.0462455	Tetratricopeptide repeat (TPR)-like superfamily protein	TPR2	PF13414	PTHR22904,PTHR22904:SF312	KOG0551		LOC_Os03g53910.1	tetratricopeptide repeat domain containing protein, expressed
AT1G04140.2	1146	1021	1140	1025	-0.153199	Transducin family protein / WD-40 repeat family protein		PF00400	PTHR22874,PTHR22874:SF4	KOG0266	GO:0005515	LOC_Os09g12550.1	WD domain, G-beta repeat domain containing protein, expressed
AT1G04150.1	9	5	9	5	-0.834535	C2 calcium/lipid-binding plant phosphoribosyltransferase family protein		PF00168,PF08372	PTHR10024,PTHR10024:SF253		GO:0005515	LOC_Os02g57090.1	anthranilate phosphoribosyltransferase, putative, expressed
AT1G04160.1	290	364	288	365	0.341913	myosin XI B	XIB	PF02736,PF01843,PF00612,PF00063	PTHR13140,PTHR13140:SF256		GO:0016459,GO:0005524,GO:0003774,GO:0005515	LOC_Os06g29350.1	myosin, putative, expressed
AT1G04170.1	42	28	41	28	-0.581254	eukaryotic translation initiation factor 2 gamma subunit	EIF2 GAMMA	PF03144,PF00009,PF09173	PTHR23115,PTHR23115:SF164		GO:0005525	LOC_Os12g41400.1	eukaryotic translation initiation factor 2 subunit gamma, putative, expressed
AT1G04190.1	249	250	248	251	0.0191921	Tetratricopeptide repeat (TPR)-like superfamily protein	TPR3	PF00515,PF13414	PTHR22904,PTHR22904:SF289	KOG2449	GO:0005515	LOC_Os12g41190.1	tetratricopeptide repeat domain containing protein, expressed
AT1G04200.1	179	230	178	230	0.375998	dyggve-melchior-clausen syndrome protein		PF09742	PTHR12895,PTHR12895:SF9	KOG2225		LOC_Os01g56630.1	dymeclin, putative, expressed
AT1G04210.1	710	559	706	561	-0.330464	Leucine-rich repeat protein kinase family protein		PF13855,PF14381,PF07714	PTHR24359,PTHR24359:SF20	KOG0192	GO:0005515,GO:0006468,GO:0004672	LOC_Os03g53250.1	expressed protein
AT1G04220.1	1451	790	1443	793	-0.86321	3-ketoacyl-CoA synthase 2	KCS2	PF08541,PF08392	PTHR31561,PTHR31561:SF25		GO:0016747,GO:0008610,GO:0016020,GO:0006633	LOC_Os05g49900.1	3-ketoacyl-CoA synthase, putative, expressed
AT1G04230.1	285	234	283	234	-0.27161	rRNA-processing EFG1-like protein (DUF2361)		PF10153	PTHR33911	KOG4484		LOC_Os03g58340.1	expressed protein
AT1G04240.2	336	258	334	259	-0.36754	AUX/IAA transcriptional regulator family protein	SHY2	PF02309	PTHR31734,PTHR31734:SF11		GO:0006355,GO:0005634	LOC_Os12g40900.1	OsIAA31 - Auxin-responsive Aux/IAA gene family member, expressed
AT1G04250.1	1148	978	1142	982	-0.217727	AUX/IAA transcriptional regulator family protein	AXR3	PF02309	PTHR31734,PTHR31734:SF30		GO:0006355,GO:0005634	LOC_Os03g43400.1	OsIAA11 - Auxin-responsive Aux/IAA gene family member, expressed
AT1G04260.1	212	231	210	232	0.140647	CAMV movement protein interacting protein 7	MPI7	PF03208	PTHR19317,PTHR19317:SF7	KOG3142		LOC_Os05g39670.1	prenylated rab acceptor, putative, expressed
AT1G04270.1	2823	3539	2807	3553	0.339838	cytosolic ribosomal protein S15	RPS15	PF00203	PTHR11880,PTHR11880:SF10	KOG0898	GO:0006412,GO:0005840,GO:0003735	LOC_Os07g08660.1	40S ribosomal protein S15, putative, expressed
AT1G04280.1	9	2	8	2	-2.07422	P-loop containing nucleoside triphosphate hydrolases superfamily protein		PF06414	PTHR31153,PTHR31153:SF3		GO:0016301,GO:0005524	LOC_Os05g43300.1	expressed protein
AT1G04290.1	174	184	173	185	0.0982409	Thioesterase superfamily protein		PF03061	PTHR21660,PTHR21660:SF6	KOG3328		LOC_Os01g65950.1	thioesterase family protein, putative, expressed
AT1G04300.3	52	33	51	33	-0.627875	TRAF-like superfamily protein		PF00917	PTHR26379,PTHR26379:SF164		GO:0005515	LOC_Os12g40520.1	MATH domain containing protein, expressed
AT1G04310.1	337	151	335	152	-1.14259	ethylene response sensor 2	ERS2	PF01590	PTHR24423,PTHR24423:SF530	KOG0519	GO:0005515	LOC_Os02g57530.3	ethylene receptor, putative, expressed
AT1G04330.1	27	17	26	17	-0.669962	hypothetical protein			PTHR33912,PTHR33912:SF2
AT1G04340.1	320	332	318	333	0.0666478	HR-like lesion-inducing protein-like protein		PF05514	PTHR31474,PTHR31474:SF4			LOC_Os04g10240.1	nicotiana lesion-inducing like, putative, expressed
AT1G04350.1	414	266	411	267	-0.622991	2-oxoglutarate (2OG) and Fe(II)-dependent oxygenase superfamily protein		PF14226,PF03171	PTHR10209,PTHR10209:SF122	KOG0143	GO:0055114,GO:0016491	LOC_Os03g48430.1	1-aminocyclopropane-1-carboxylate oxidase homolog 4, putative, expressed
AT1G04360.1	3	6	3	6	1.01346	RING/U-box superfamily protein		PF13639	PTHR14155,PTHR14155:SF178		GO:0008270,GO:0005515	LOC_Os02g57460.1	RING-H2 finger protein ATL5G, putative, expressed
AT1G04380.1	7	9	7	9	0.376032	2-oxoglutarate (2OG) and Fe(II)-dependent oxygenase superfamily protein		PF14226,PF03171	PTHR10209,PTHR10209:SF122	KOG0143	GO:0055114,GO:0016491	LOC_Os04g10350.1	1-aminocyclopropane-1-carboxylate oxidase homolog 2, putative, expressed
AT1G04390.1	125	111	124	111	-0.152028	BTB/POZ domain-containing protein		PF00651	PTHR35918,PTHR35918:SF1		GO:0005515	LOC_Os06g46240.1	BTB/POZ domain containing protein, putative, expressed
AT1G04400.1	423	584	421	586	0.478853	cryptochrome 2	CRY2	PF00875,PF03441	PTHR11455,PTHR11455:SF24			LOC_Os02g41550.3	FAD binding domain of DNA photolyase domain containing protein, expressed
AT1G04410.1	5864	5768	5832	5791	-0.0102469	Lactate/malate dehydrogenase family protein	c-NAD-MDH1	PF00056,PF02866	PTHR23382,PTHR23382:SF7		GO:0055114,GO:0016491,GO:0016616,GO:0016615,GO:0006108	LOC_Os10g33800.1	lactate/malate dehydrogenase, putative, expressed
AT1G04420.1	712	760	708	763	0.107563	NAD(P)-linked oxidoreductase superfamily protein		PF00248	PTHR11732,PTHR11732:SF255	KOG1575		LOC_Os03g41510.2	oxidoreductase, aldo/keto reductase family protein, putative, expressed
AT1G04430.1	661	1247	657	1251	0.928505	S-adenosyl-L-methionine-dependent methyltransferases superfamily protein		PF03141	PTHR10108,PTHR10108:SF704		GO:0008168	LOC_Os10g33720.3	methyltransferase, putative, expressed
AT1G04440.1	355	410	353	412	0.223313	casein kinase like 13	CKL13	PF00069	PTHR11909,PTHR11909:SF178	KOG1163	GO:0006468,GO:0005524,GO:0004672	LOC_Os02g56560.1	CK1_CaseinKinase_1.6 - CK1 includes the casein kinase 1 kinases, expressed
AT1G04445.2	36	39	35	39	0.149274	C2H2-like zinc finger protein
AT1G04450.1	5	4	4	4	-0.350333	ROP-interactive CRIB motif-containing protein 3	RIC3	PF00786	PTHR23177,PTHR23177:SF8			LOC_Os02g56580.1	P21-Rho-binding domain containing protein, putative, expressed
AT1G04455.1	5	3	5	3	-0.992178	hypothetical protein
AT1G04470.1	153	175	152	175	0.207949	hypothetical protein (DUF810)		PF05664	PTHR31280,PTHR31280:SF1			LOC_Os03g04560.1	expressed protein
AT1G04480.1	933	1106	928	1110	0.258193	Ribosomal protein L14p/L23e family protein		PF00238	PTHR11761,PTHR11761:SF10	KOG0901	GO:0006412,GO:0005840,GO:0003735	LOC_Os02g56960.1	ribosomal protein, putative, expressed
AT1G04510.1	186	179	185	179	-0.0458883	MOS4-associated complex 3A	MAC3A	PF00400,PF08606	PTHR22840		GO:0005515	LOC_Os10g32880.1	WD domain, G-beta repeat domain containing protein, expressed
AT1G04520.1	176	100	175	100	-0.797941	plasmodesmata-located protein 2	PDLP2	PF01657	PTHR32080,PTHR32080:SF4			LOC_Os04g45460.1	cysteine-rich repeat secretory protein precursor, putative, expressed
AT1G04530.1	656	554	652	556	-0.231645	Tetratricopeptide repeat (TPR)-like superfamily protein	TPR4	PF13181	PTHR26312,PTHR26312:SF53		GO:0005515	LOC_Os03g04710.1	expressed protein
AT1G04540.1	287	280	285	281	-0.0196192	Calcium-dependent lipid-binding (CaLB domain) family protein		PF00168	PTHR32246,PTHR32246:SF16		GO:0005515	LOC_Os02g57000.1	C2 domain containing protein, putative, expressed
AT1G04550.2	332	307	330	308	-0.101906	AUX/IAA transcriptional regulator family protein	IAA12	PF02309	PTHR31734,PTHR31734:SF10		GO:0006355,GO:0005634	LOC_Os02g57250.2	OsIAA10 - Auxin-responsive Aux/IAA gene family member, expressed
AT1G04555.1	90	78	89	78	-0.194098	transmembrane protein			PTHR33344			LOC_Os02g57170.1	expressed protein
AT1G04560.1	19	7	18	7	-1.38874	AWPM-19-like family protein		PF05512	PTHR33294,PTHR33294:SF5			LOC_Os07g24000.1	AWPM-19-like membrane family protein, putative, expressed
AT1G04570.1	143	96	142	96	-0.556314	Major facilitator superfamily protein		PF03092	PTHR31585,PTHR31585:SF12		GO:0016021,GO:0006810	LOC_Os07g24230.1	integral membrane transporter family protein, putative, expressed
AT1G04580.1	250	138	248	139	-0.840958	aldehyde oxidase 4	AO4	PF00111,PF03450,PF01799,PF01315,PF00941,PF02738	PTHR11908,PTHR11908:SF98		GO:0051536,GO:0009055,GO:0055114,GO:0046872,GO:0016491	LOC_Os07g18120.1	aldehyde oxidase, putative, expressed
AT1G04590.2	228	185	227	185	-0.292026	PPR containing-like protein			PTHR24015,PTHR24015:SF716			LOC_Os12g02950.1	EMB2748, putative, expressed
AT1G04600.1	36	32	35	32	-0.158862	myosin XI A	XIA	PF00612,PF02736,PF01843,PF00063	PTHR13140,PTHR13140:SF391		GO:0005515,GO:0016459,GO:0005524,GO:0003774	LOC_Os06g29350.1	myosin, putative, expressed
AT1G04610.1	15	15	15	15	0.0134623	YUCCA 3	YUC3	PF00743	PTHR23023,PTHR23023:SF141	KOG1399	GO:0055114,GO:0050661,GO:0050660,GO:0004499	LOC_Os04g03980.1	flavin monooxygenase, putative, expressed
AT1G04620.1	125	92	124	92	-0.430764	coenzyme F420 hydrogenase family / dehydrogenase, beta subunit family	HCAR	PF04422,PF04432	PTHR31332,PTHR31332:SF0			LOC_Os04g25400.2	uncharacterized protein all1601, putative, expressed
AT1G04625.1	11	28	10	28	1.42873	Polynucleotidyl transferase, ribonuclease H-like superfamily protein		PF13456	PTHR33033,PTHR33033:SF14			LOC_Os06g46960.1	nucleic acid binding protein, putative, expressed
AT1G04630.1	316	506	314	507	0.691245	GRIM-19 protein	MEE4	PF06212	PTHR12966,PTHR12966:SF0	KOG3300		LOC_Os03g09210.1	NADH dehydrogenase 1 alpha subcomplex subunit 13, putative, expressed
AT1G04635.1	13	14	12	14	0.124135	ribonuclease P family protein / Rpp14 family protein	EMB1687	PF01900	PTHR10993	KOG4639	GO:0008033,GO:0004540	LOC_Os04g22870.1	rpp14 family protein, expressed
AT1G04640.1	139	137	138	138	-0.00751486	lipoyltransferase 2	LIP2	PF03099	PTHR10993,PTHR10993:SF7	KOG0325	GO:0006464	LOC_Os03g20560.1	biotin--protein ligase, putative, expressed
AT1G04645.1	203	209	202	209	0.0519343	Plant self-incompatibility protein S1 family		PF05938	PTHR31232,PTHR31232:SF5
AT1G04650.1	26	18	26	18	-0.516736	holliday junction resolvase		PF14868	PTHR36702,PTHR36702:SF1			LOC_Os03g05040.1	expressed protein
AT1G04660.1	39	78	39	78	1.01363	glycine-rich protein
AT1G04680.1	4384	3917	4360	3932	-0.148879	Pectin lyase-like superfamily protein		PF00544	PTHR31683,PTHR31683:SF20			LOC_Os04g05050.1	pectate lyase precursor, putative, expressed
AT1G04690.1	1193	1117	1187	1121	-0.0821714	potassium channel beta subunit 1	KAB1	PF00248	PTHR11732,PTHR11732:SF14	KOG1575		LOC_Os02g57240.1	oxidoreductase, aldo/keto reductase family protein, putative, expressed
AT1G04700.1	9	14	8	14	0.733136	PB1 domain-containing protein tyrosine kinase		PF00564,PF07714	PTHR23257,PTHR23257:SF547	KOG0192	GO:0005515,GO:0006468,GO:0004672	LOC_Os12g40279.1	protein kinase domain containing protein, expressed
AT1G04710.1	273	287	272	288	0.0829999	peroxisomal 3-ketoacyl-CoA thiolase 4	PKT4	PF02803,PF00108	PTHR18919,PTHR18919:SF93		GO:0016747,GO:0008152	LOC_Os02g57260.1	3-ketoacyl-CoA thiolase, peroxisomal precursor, putative, expressed
AT1G04730.1	13	8	13	8	-0.775722	P-loop containing nucleoside triphosphate hydrolases superfamily protein	CTF18	PF00004	PTHR13779,PTHR13779:SF31		GO:0005524	LOC_Os03g15810.1	AAA-type ATPase family protein, putative, expressed
AT1G04750.1	636	674	633	676	0.096063	vesicle-associated membrane protein 721	VAMP721	PF13774,PF00957	PTHR21136,PTHR21136:SF95	KOG0859	GO:0016192,GO:0016021	LOC_Os07g09600.1	vesicle-associated membrane protein, putative, expressed
AT1G04760.1	30	26	29	26	-0.169992	vesicle-associated membrane protein 726	VAMP726	PF13774,PF00957	PTHR21136,PTHR21136:SF109	KOG0859	GO:0016192,GO:0016021	LOC_Os07g09600.1	vesicle-associated membrane protein, putative, expressed
AT1G04770.1	371	1084	369	1088	1.56232	Tetratricopeptide repeat (TPR)-like superfamily protein		PF00515	PTHR36326,PTHR36326:SF1		GO:0005515	LOC_Os05g43040.1	tetratricopeptide repeat domain containing protein, expressed
AT1G04778.1	3	5	3	5	0.597793	hypothetical protein
AT1G04780.1	685	648	681	650	-0.0666921	Ankyrin repeat family protein		PF13857,PF11904	PTHR12447,PTHR12447:SF8	KOG0522		LOC_Os07g25460.1	ankyrin repeat domain containing protein, expressed
AT1G04790.1	1015	868	1009	871	-0.212396	RING/U-box superfamily protein		PF13639	PTHR22763,PTHR22763:SF54		GO:0008270,GO:0005515	LOC_Os04g43220.2	zinc finger, C3HC4 type domain containing protein, expressed
AT1G04800.1	1003	858	997	861	-0.211916	glycine-rich protein
AT1G04810.1	805	559	801	561	-0.513985	26S proteasome regulatory complex, non-ATPase subcomplex, Rpn2/Psmd1 subunit		PF13646,PF01851	PTHR10943,PTHR10943:SF3			LOC_Os08g12820.1	proteasome/cyclosome repeat containing protein, expressed
AT1G04820.1	9237	9579	9188	9617	0.0659073	tubulin alpha-4 chain	TUA4	PF03953,PF00091	PTHR11588,PTHR11588:SF101		GO:0003924,GO:0007017,GO:0005874	LOC_Os03g51600.1	tubulin/FtsZ domain containing protein, putative, expressed
AT1G04830.2	72	74	72	74	0.0429647	Ypt/Rab-GAP domain of gyp1p superfamily protein		PF00566	PTHR22957,PTHR22957:SF329	KOG4567		LOC_Os01g68010.1	TBC domain containing protein, expressed
AT1G04840.1	6	10	6	10	0.676727	Tetratricopeptide repeat (TPR)-like superfamily protein		PF14432,PF01535,PF13041	PTHR24015,PTHR24015:SF790			LOC_Os09g15800.1	tetratricopeptide-like helical, putative, expressed
AT1G04850.1	1206	1296	1199	1301	0.117374	ubiquitin-associated (UBA)/TS-N domain-containing protein		PF00627,PF09409	PTHR13020,PTHR13020:SF34	KOG2699		LOC_Os02g30180.1	ZOS2-07 - C2H2 zinc finger protein, expressed
AT1G04860.1	342	277	340	278	-0.291252	ubiquitin-specific protease 2	UBP2	PF02148,PF13423	PTHR24006,PTHR24006:SF345		GO:0008270	LOC_Os09g32740.1	ubiquitin carboxyl-terminal hydrolase family protein, expressed
AT1G04870.2	184	198	183	198	0.11945	protein arginine methyltransferase 10	PRMT10	PF06325	PTHR11006,PTHR11006:SF68	KOG1499	GO:0008168,GO:0006479	LOC_Os06g05090.1	methyltransferase domain containing protein, expressed
AT1G04880.1	50	47	49	47	-0.0611931	HMG (high mobility group) box protein with ARID/BRIGHT DNA-binding domain-containing protein		PF00505,PF01388	PTHR13711,PTHR13711:SF213	KOG0381	GO:0003677	LOC_Os02g27060.2	high mobility group, putative, expressed
AT1G04890.1	4	5	4	5	0.33539	zein-binding protein (Protein of unknown function, DUF593)		PF04576	PTHR31448			LOC_Os03g50100.1	expressed protein
AT1G04900.1	126	121	125	121	-0.0509813	NADH dehydrogenase ubiquinone complex I, assembly factor-like protein (DUF185)		PF02636	PTHR12049,PTHR12049:SF5			LOC_Os01g68390.1	Uncharacterized ACR, COG1565 containing protein, putative, expressed
AT1G04910.1	362	422	360	423	0.233002	O-fucosyltransferase family protein		PF10250	PTHR31741,PTHR31741:SF14			LOC_Os11g29120.1	growth regulator related protein, putative, expressed
AT1G04920.1	33	17	33	17	-0.986822	sucrose phosphate synthase 3F	SPS3F	PF00862,PF05116,PF00534	PTHR12526,PTHR12526:SF360	KOG0853	GO:0016157,GO:0005985	LOC_Os01g69030.3	sucrose-phosphate synthase, putative, expressed
AT1G04930.2	38	54	38	54	0.50694	hydroxyproline-rich glycoprotein family protein		PF15306	PTHR37173,PTHR37173:SF1		GO:0017053,GO:0007049	LOC_Os03g13190.1	transposon protein, putative, unclassified, expressed
AT1G04940.1	654	663	650	666	0.0343495	translocon at the inner envelope membrane of chloroplasts 20	Tic20-I	PF16166	PTHR33510,PTHR33510:SF6			LOC_Os07g38110.2	tic20, putative, expressed
AT1G04945.3	691	683	687	686	-0.00333895	HIT-type Zinc finger family protein		PF04438,PF16166	PTHR33510,PTHR33510:SF6			LOC_Os01g73150.1	expressed protein
AT1G04950.1	8	6	7	6	-0.308259	TATA BOX ASSOCIATED FACTOR II 59	TAFII59	PF07571,PF02969	PTHR10221,PTHR10221:SF11		GO:0051090,GO:0005634,GO:0006352	LOC_Os01g32750.1	TATA binding protein-associated factor, putative, expressed
AT1G04960.2	105	117	104	117	0.163574	golgin family A protein (DUF1664)		PF07889	PTHR31903,PTHR31903:SF2			LOC_Os09g30478.1	expressed protein
AT1G04970.1	75	53	74	53	-0.491915	lipid-binding serum glycoprotein family protein		PF02886,PF01273	PTHR10504,PTHR10504:SF73	KOG4160	GO:0008289	LOC_Os06g20430.1	BPI/LBP family protein At3g20270 precursor, putative, expressed
AT1G04980.1	222	284	221	285	0.366191	PDI-like 2-2	PDIL2-2	PF13848,PF00085	PTHR18929,PTHR18929:SF38	KOG0191	GO:0045454	LOC_Os09g27830.1	OsPDIL2-3 protein disulfide isomerase PDIL2-3, expressed
AT1G04985.1	56	82	56	82	0.563738	triacylglycerol lipase-like protein			PTHR36703,PTHR36703:SF1			LOC_Os04g57330.1	expressed protein
AT1G04990.1	233	216	231	216	-0.0962128	Zinc finger C-x8-C-x5-C-x3-H type family protein		PF14608,PF00642	PTHR12506,PTHR12506:SF24	KOG1677	GO:0046872	LOC_Os12g21700.1	zinc finger C-x8-C-x5-C-x3-H type family protein, expressed
AT1G05000.2	9	13	8	13	0.570282	Phosphotyrosine protein phosphatases superfamily protein	PFA-DSP1	PF13350	PTHR31126,PTHR31126:SF15	KOG1572		LOC_Os06g10650.1	tyrosine phosphatase family protein, putative, expressed
AT1G05010.1	203	264	201	265	0.396048	ethylene-forming enzyme	EFE	PF14226,PF03171	PTHR10209,PTHR10209:SF193	KOG0143	GO:0055114,GO:0016491	LOC_Os09g27820.1	1-aminocyclopropane-1-carboxylate oxidase protein, putative, expressed
AT1G05020.1	11	8	11	8	-0.445969	ENTH/ANTH/VHS superfamily protein		PF07651	PTHR22951,PTHR22951:SF26	KOG0251	GO:0005543	LOC_Os03g16800.1	clathrin assembly protein, putative, expressed
AT1G05030.1	65	48	65	48	-0.439173	Major facilitator superfamily protein		PF07690	PTHR23503,PTHR23503:SF8	KOG0254	GO:0055085,GO:0016021	LOC_Os09g23110.1	transporter family protein, putative, expressed
AT1G05055.1	135	123	134	123	-0.12672	general transcription factor II H2	GTF2H2	PF13519,PF07975	PTHR12695,PTHR12695:SF2		GO:0008270,GO:0006281,GO:0006351,GO:0006289,GO:0000439	LOC_Os04g42990.1	suppressor of stem-loop protein 1, putative, expressed
AT1G05060.1	128	114	127	114	-0.15434	coiled-coil protein			PTHR36704			LOC_Os06g13220.1	expressed protein
AT1G05065.1	6	6	6	6	0.0134623	CLAVATA3/ESR-RELATED 20	CLE20		PTHR36705,PTHR36705:SF2
AT1G05070.1	297	286	295	287	-0.0411574	transmembrane protein, putative (DUF1068)		PF06364	PTHR32254			LOC_Os03g56610.1	expressed protein
AT1G05080.1	6	2	6	2	-1.5715	F-box/RNI-like/FBD-like domains-containing protein		PF07723,PF00646,PF08387	PTHR32212,PTHR32212:SF112		GO:0005515	LOC_Os01g39670.1	OsFBD1 - F-box and FBD domain containing protein, expressed
AT1G05087.1	89	97	88	97	0.138254	dentin sialophosphoprotein			PTHR36308,PTHR36308:SF1			LOC_Os08g34760.1	expressed protein
AT1G05090.1	201	210	199	210	0.0767777	dentin sialophosphoprotein-like protein			PTHR36308,PTHR36308:SF1
AT1G05100.1	45	17	44	17	-1.37427	mitogen-activated protein kinase kinase kinase 18	MAPKKK18	PF00069	PTHR24361,PTHR24361:SF380	KOG0198	GO:0006468,GO:0005524,GO:0004672	LOC_Os02g21700.1	STE_MEKK_ste11_MAP3K.8 - STE kinases include homologs to sterile 7, sterile 11 and sterile 20 from yeast, expressed
AT1G05120.2	310	281	308	282	-0.128268	Helicase protein with RING/U-box domain-containing protein		PF14634,PF04851,PF00271	PTHR10799,PTHR10799:SF763		GO:0008270,GO:0005515,GO:0016787,GO:0005524,GO:0003677	LOC_Os07g32730.1	DNA repair protein rhp16, putative, expressed
AT1G05140.1	387	312	385	313	-0.297258	Peptidase M50 family protein		PF13180,PF02163	PTHR22939,PTHR22939:SF97		GO:0005515,GO:0006508,GO:0004222	LOC_Os03g38230.1	peptidase M50 family protein, putative, expressed
AT1G05150.1	683	662	679	664	-0.0327186	Calcium-binding tetratricopeptide family protein		PF13371,PF13414,PF07719	PTHR23083,PTHR23083:SF380			LOC_Os03g15740.1	uncharacterized TPR repeat-containing protein, putative, expressed
AT1G05160.1	175	176	174	177	0.0255747	cytochrome P450, family 88, subfamily A, polypeptide 3	CYP88A3	PF00067	PTHR24286,PTHR24286:SF67	KOG0157	GO:0055114,GO:0020037,GO:0016705,GO:0005506	LOC_Os06g02019.1	cytochrome P450, putative, expressed
AT1G05170.2	95	78	94	78	-0.272261	Galactosyltransferase family protein		PF13334,PF01762	PTHR11214,PTHR11214:SF5	KOG2288	GO:0016020,GO:0008378,GO:0006486	LOC_Os03g38050.1	galactosyltransferase, putative, expressed
AT1G05180.1	272	215	271	215	-0.329205	NAD(P)-binding Rossmann-fold superfamily protein	AXR1	PF00899	PTHR10953		GO:0008641	LOC_Os03g60550.1	ThiF family domain containing protein, putative, expressed
AT1G05190.1	2552	3044	2538	3056	0.267552	Ribosomal protein L6 family	emb2394	PF00347	PTHR11655,PTHR11655:SF14	KOG3254	GO:0019843,GO:0006412,GO:0005840,GO:0003735	LOC_Os03g54040.1	ribosomal protein L6, putative, expressed
AT1G05200.1	166	160	165	160	-0.0443027	glutamate receptor 3.4	GLR3.4	PF00497,PF13458,PF00060	PTHR18966,PTHR18966:SF190		GO:0016020,GO:0004970	LOC_Os06g46670.2	glutamate receptor, putative, expressed
AT1G05205.1	146	221	145	221	0.613119	hexokinase-1 protein			PTHR36706,PTHR36706:SF1			LOC_Os06g46700.1	expressed protein
AT1G05210.1	69	86	69	86	0.330897	Transmembrane protein 97, Putative		PF10914	PTHR31204,PTHR31204:SF1			LOC_Os07g27450.1	expressed protein
AT1G05230.10	139	145	138	145	0.0694691	homeodomain GLABROUS 2	HDG2	PF00046,PF01852	PTHR24326,PTHR24326:SF239	KOG0484,KOG0483	GO:0003677,GO:0008289	LOC_Os04g53540.1	homeobox and START domains containing protein, putative, expressed
AT1G05240.1	9	5	9	5	-0.98717	Peroxidase superfamily protein		PF00141	PTHR31235		GO:0055114,GO:0020037,GO:0006979,GO:0004601	LOC_Os11g43980.1	peroxidase precursor, putative, expressed
AT1G05250.1	8	3	7	3	-1.30822	Peroxidase superfamily protein		PF00141	PTHR31235		GO:0055114,GO:0020037,GO:0006979,GO:0004601	LOC_Os11g43980.1	peroxidase precursor, putative, expressed
AT1G05260.1	825	709	821	712	-0.205161	Peroxidase superfamily protein	RCI3	PF00141	PTHR31235,PTHR31235:SF39		GO:0055114,GO:0020037,GO:0006979,GO:0004601	LOC_Os06g46799.1	peroxidase precursor, putative, expressed
AT1G05270.1	301	285	299	286	-0.0654238	TraB family protein		PF01963	PTHR21530,PTHR21530:SF0			LOC_Os05g42010.1	TraB family protein, putative, expressed
AT1G05280.1	14	7	14	7	-0.987086	ERV-F (C)1 provirus ancestral Env polyprotein, putative (DUF604)		PF02434	PTHR10811,PTHR10811:SF19	KOG2246	GO:0016757,GO:0016020	LOC_Os10g39020.2	fringe-related protein, putative, expressed
AT1G05291.1	23	20	23	20	-0.188456	GPI inositol-deacylase C, putative (DUF1218)		PF06749	PTHR31769,PTHR31769:SF4			LOC_Os07g36110.2	expressed protein
AT1G05300.1	9	7	9	7	-0.349108	zinc transporter 5 precursor	ZIP5	PF02535	PTHR11040,PTHR11040:SF35	KOG1558	GO:0055085,GO:0046873,GO:0030001,GO:0016020	LOC_Os05g39560.1	metal cation transporter, putative, expressed
AT1G05310.1	17	15	17	15	-0.215823	Pectin lyase-like superfamily protein		PF01095	PTHR31321,PTHR31321:SF8		GO:0042545,GO:0030599,GO:0005618	LOC_Os08g10604.1	pectinesterase, putative, expressed
AT1G05320.1	8	3	7	3	-1.31019	myosin heavy chain, embryonic smooth protein				KOG0978		LOC_Os04g52460.1	retrotransposon protein, putative, unclassified, expressed
AT1G05340.1	25	23	25	23	-0.138667	cysteine-rich TM module stress tolerance protein		PF12734	PTHR31568,PTHR31568:SF17			LOC_Os01g72009.1	expressed protein
AT1G05350.1	402	463	400	465	0.217196	NAD(P)-binding Rossmann-fold superfamily protein		PF00899	PTHR10953,PTHR10953:SF9		GO:0008641	LOC_Os02g30310.1	ThiF family domain containing protein, putative, expressed
AT1G05360.1	135	120	134	120	-0.156405	vacuole membrane-like protein	KMS2		PTHR10281,PTHR10281:SF44			LOC_Os01g57066.1	transmembrane protein 49, putative, expressed
AT1G05370.1	30	21	30	21	-0.501382	Sec14p-like phosphatidylinositol transfer family protein		PF00650	PTHR10174,PTHR10174:SF125	KOG1470		LOC_Os03g11950.1	SEC14 cytosolic factor family protein, putative, expressed
AT1G05380.1	582	505	578	507	-0.191375	Acyl-CoA N-acyltransferase with RING/FYVE/PHD-type zinc finger protein		PF00628,PF16135	PTHR24098,PTHR24098:SF10		GO:0005515	LOC_Os07g07690.2	PHD-finger domain containing protein, expressed
AT1G05385.1	172	156	171	157	-0.12751	photosystem II 11 kDa protein-like protein	LPA19	PF13326	PTHR34041,PTHR34041:SF3		GO:0010207	LOC_Os03g53640.1	expressed protein
AT1G05400.1	6	7	5	7	0.362397	hypothetical protein
AT1G05410.1	173	198	172	199	0.208183	CDPK adapter, putative (DUF1423)		PF07227	PTHR33345,PTHR33345:SF2			LOC_Os03g53590.1	expressed protein
AT1G05420.2	41	93	41	93	1.19519	ovate family protein 12	OFP12	PF04844	PTHR33057,PTHR33057:SF21			LOC_Os03g06350.1	DUF623 domain containing protein, expressed
AT1G05430.1	218	220	216	220	0.0267153	hypothetical protein			PTHR35986,PTHR35986:SF1			LOC_Os10g29530.1	expressed protein
AT1G05440.1	27	25	26	25	-0.0997021	C-8 sterol isomerase		PF04622	PTHR10868,PTHR10868:SF1	KOG4143	GO:0006869	LOC_Os03g53580.1	expressed protein
AT1G05450.2	14	17	14	17	0.249984	Bifunctional inhibitor/lipid-transfer protein/seed storage 2S albumin superfamily protein		PF14368	PTHR33044,PTHR33044:SF13			LOC_Os03g57980.1	LTPL99 - Protease inhibitor/seed storage/LTP family protein precursor, expressed
AT1G05460.1	111	135	110	136	0.302568	P-loop containing nucleoside triphosphate hydrolases superfamily protein	SDE3	PF13086,PF13087	PTHR10887,PTHR10887:SF362			LOC_Os03g06440.1	RNA helicase SDE3, putative, expressed
AT1G05470.1	48	35	47	35	-0.448311	DNAse I-like superfamily protein	CVP2	PF03372	PTHR11200,PTHR11200:SF174	KOG0565		LOC_Os10g28660.1	type I inositol-1,4,5-trisphosphate 5-phosphatase, putative, expressed
AT1G05490.1	1151	1088	1144	1092	-0.0678116	chromatin remodeling 31	chr31	PF00271,PF00176	PTHR10799,PTHR10799:SF748		GO:0005524	LOC_Os05g32610.1	required to maintain repression 1, putative, expressed
AT1G05500.1	251	220	250	220	-0.180006	Calcium-dependent lipid-binding (CaLB domain) family protein	NTMC2T2.1	PF17047,PF00168	PTHR10774,PTHR10774:SF91	KOG1328,KOG1012,KOG1030	GO:0005515	LOC_Os04g55220.1	C2 domain containing protein, expressed
AT1G05510.1	11	5	11	5	-1.27508	naphthalene 1,2-dioxygenase subunit alpha (DUF1264)		PF06884	PTHR31360,PTHR31360:SF0			LOC_Os05g49440.2	DUF1264 domain containing protein, putative, expressed
AT1G05520.1	657	507	653	509	-0.359316	Sec23/Sec24 protein transport family protein		PF00626,PF04810,PF04815,PF08033,PF04811	PTHR11141		GO:0030127,GO:0008270,GO:0006888,GO:0006886	LOC_Os11g24560.1	protein transport protein, putative, expressed
AT1G05540.1	347	253	345	253	-0.443137	hypothetical protein (DUF295)		PF03478	PTHR31681,PTHR31681:SF3
AT1G05550.3	19	34	19	34	0.852998	hypothetical protein (DUF295)		PF03478	PTHR31681,PTHR31681:SF3
AT1G05560.2	239	175	238	176	-0.436178	UDP-glucosyltransferase 75B1	UGT75B1	PF00201	PTHR11926,PTHR11926:SF98		GO:0016758,GO:0008152	LOC_Os06g39270.1	UDP-glucoronosyl and UDP-glucosyl transferase domain containing protein, expressed
AT1G05570.1	90	74	90	74	-0.268701	callose synthase 1	CALS1	PF04652,PF14288,PF02364	PTHR12741,PTHR12741:SF9		GO:0016020,GO:0006075,GO:0003843,GO:0000148	LOC_Os03g03610.3	1,3-beta-glucan synthase component domain containing protein, expressed
AT1G05580.1	193	241	192	241	0.330963	cation/H+ exchanger 23	CHX23	PF00999	PTHR32468,PTHR32468:SF15		GO:0055085,GO:0016021,GO:0015299,GO:0006812	LOC_Os05g40650.1	ATCHX, putative, expressed
AT1G05590.1	329	311	327	312	-0.0676881	beta-hexosaminidase 2	HEXO2	PF14845,PF00728	PTHR22600,PTHR22600:SF14		GO:0005975,GO:0004553	LOC_Os07g38790.1	beta-hexosaminidase precursor, putative, expressed
AT1G05600.1	72	68	72	68	-0.0796377	Tetratricopeptide repeat (TPR)-like superfamily protein	EMB3101	PF01535,PF12854,PF13041	PTHR24015,PTHR24015:SF542			LOC_Os06g05920.1	Rf1, mitochondrial precursor, putative, expressed
AT1G05610.2	5	5	5	5	-0.139173	ADP-glucose pyrophosphorylase small subunit 2	APS2	PF00483	PTHR22572,PTHR22572:SF98	KOG1322	GO:0016779,GO:0009058	LOC_Os08g25734.2	glucose-1-phosphate adenylyltransferase large subunit, chloroplast precursor, putative, expressed
AT1G05620.1	49	39	49	39	-0.33394	uridine-ribohydrolase 2	URH2	PF01156	PTHR12304,PTHR12304:SF1	KOG2938		LOC_Os03g31170.1	inosine-uridine preferring nucleoside hydrolase family protein, putative, expressed
AT1G05630.1	86	77	85	77	-0.13773	Endonuclease/exonuclease/phosphatase family protein	5PTASE13	PF03372	PTHR11200,PTHR11200:SF133	KOG0565		LOC_Os08g41270.1	endonuclease/exonuclease/phosphatase family domain containing protein, expressed
AT1G05640.1	74	63	74	63	-0.218521	Ankyrin repeat family protein		PF13962,PF12796	PTHR24186,PTHR24186:SF8	KOG4412		LOC_Os08g42960.2	ankyrin repeat-containing protein, putative, expressed
AT1G05670.1	12	5	11	5	-1.18979	Pentatricopeptide repeat (PPR-like) superfamily protein		PF01535,PF13041	PTHR24015,PTHR24015:SF380			LOC_Os07g32900.1	PPR repeat containing protein, expressed
AT1G05680.1	338	201	336	201	-0.737849	Uridine diphosphate glycosyltransferase 74E2	UGT74E2	PF00201	PTHR11926,PTHR11926:SF279	KOG1192	GO:0016758,GO:0008152	LOC_Os09g34250.1	UDP-glucoronosyl and UDP-glucosyl transferase domain containing protein, expressed
AT1G05690.1	27	25	27	25	-0.126462	BTB and TAZ domain protein 3	BT3	PF02135,PF00651	PTHR24413,PTHR24413:SF140	KOG1778	GO:0008270,GO:0006355,GO:0005634,GO:0004402,GO:0003712,GO:0005515	LOC_Os01g66890.1	BTBZ1 - Bric-a-Brac, Tramtrack, and Broad Complex BTB domain with TAZ zinc finger and Calmodulin-binding domains, expressed
AT1G05720.1	315	371	313	372	0.251739	selenoprotein family protein		PF08806	PTHR13077,PTHR13077:SF6	KOG3384		LOC_Os01g66960.1	selenoprotein precursor, putative, expressed
AT1G05730.1	160	163	159	163	0.0402347	FAM136A-like protein (DUF842)		PF05811	PTHR21096	KOG3377		LOC_Os11g14990.1	expressed protein
AT1G05750.1	87	104	87	104	0.270892	Tetratricopeptide repeat (TPR)-like superfamily protein	PDE247	PF12854,PF01535,PF13041	PTHR24015,PTHR24015:SF778			LOC_Os02g53050.1	tetratricopeptide-like helical, putative, expressed
AT1G05760.2	54	70	53	70	0.401382	Mannose-binding lectin superfamily protein	RTM1	PF01419	PTHR23244,PTHR23244:SF276			LOC_Os05g43240.1	jacalin-like lectin domain containing protein, expressed
AT1G05770.1	11	23	11	23	1.04576	Mannose-binding lectin superfamily protein		PF01419	PTHR23244,PTHR23244:SF249		GO:0080028,GO:0019762	LOC_Os05g43240.3	jacalin-like lectin domain containing protein, expressed
AT1G05780.1	45	59	45	59	0.404156	Vacuolar ATPase assembly integral membrane protein VMA21-like domain-containing protein		PF09446	PTHR31792		GO:0070072	LOC_Os04g52300.1	expressed protein
AT1G05783.1	8	2	8	2	-1.98654	hypothetical protein
AT1G05785.6	52	51	51	51	-0.0148376	Got1/Sft2-like vescicle transport protein family		PF04178	PTHR21493,PTHR21493:SF97	KOG1743	GO:0016192	LOC_Os02g39070.2	vesicle transport protein GOT1B, putative, expressed
AT1G05790.3	63	40	62	40	-0.647948	lipase class 3 family protein		PF01764	PTHR21493,PTHR21493:SF110		GO:0006629	LOC_Os04g41200.1	lipase, putative, expressed
AT1G05805.1	133	255	132	255	0.949679	basic helix-loop-helix (bHLH) DNA-binding superfamily protein		PF00010	PTHR16223,PTHR16223:SF10		GO:0046983	LOC_Os01g67480.1	helix-loop-helix DNA-binding domain containing protein, expressed
AT1G05810.2	59	99	58	99	0.765031	Rab GTPase-like A5A protein	RABA5E	PF00025	PTHR24073,PTHR24073:SF394	KOG0087	GO:0005525	LOC_Os08g41340.1	ras-related protein, putative, expressed
AT1G05820.1	6	14	6	14	1.18318	SIGNAL PEPTIDE PEPTIDASE-LIKE 5	SPPL5	PF02225,PF04258	PTHR12174,PTHR12174:SF36		GO:0016021,GO:0004190	LOC_Os11g24540.1	signal peptide peptidase-like 2B, putative, expressed
AT1G05830.1	101	97	100	97	-0.0522338	trithorax-like protein 2	ATX2	PF13831,PF05965,PF00856,PF05964,PF00855,PF13771	PTHR13793,PTHR13793:SF100		GO:0005634,GO:0005515	LOC_Os09g04890.1	histone-lysine N-methyltransferase, H3 lysine-4 specific ATX1, putative, expressed
AT1G05835.1	81	63	81	63	-0.360649	PHD finger protein			PTHR33184,PTHR33184:SF9			LOC_Os11g30760.2	expressed protein
AT1G05840.1	243	230	242	230	-0.0688616	Eukaryotic aspartyl protease family protein		PF00026	PTHR13683,PTHR13683:SF288	KOG1339	GO:0006508,GO:0004190	LOC_Os02g27360.1	aspartic proteinase-like protein 2 precursor, putative, expressed
AT1G05850.1	9669	10086	9617	10125	0.0742968	Chitinase family protein	POM1	PF00182	PTHR22595,PTHR22595:SF42	KOG4742	GO:0016998,GO:0006032,GO:0004568	LOC_Os09g32080.2	CHIT13 - Chitinase family protein precursor, expressed
AT1G05860.1	112	134	111	134	0.27332	INO80 complex subunit D-like protein		PF13891	PTHR16198			LOC_Os05g23840.1	expressed protein
AT1G05870.10	377	233	374	234	-0.678965	hypothetical protein (DUF1685)		PF07939	PTHR31865,PTHR31865:SF0			LOC_Os11g17930.1	expressed protein
AT1G05890.2	126	174	125	175	0.479126	RING/U-box superfamily protein	ARI5	PF01485	PTHR11685,PTHR11685:SF154	KOG1815	GO:0016567,GO:0004842	LOC_Os04g41470.1	expressed protein
AT1G05900.2	85	69	85	69	-0.287516	endonuclease III 2	NTH2	PF00730	PTHR10359	KOG1921	GO:0006284	LOC_Os11g16580.1	endonuclease III-like protein 1, putative, expressed
AT1G05910.1	510	436	507	437	-0.214283	cell division cycle protein 48-related / CDC48-like protein		PF01695,PF00439	PTHR23069		GO:0005524,GO:0005515	LOC_Os09g33980.1	bromodomain protein 103, putative, expressed
AT1G05940.1	68	36	68	36	-0.904076	cationic amino acid transporter 9	CAT9	PF00324	PTHR11785,PTHR11785:SF407	KOG1286	GO:0055085,GO:0016020,GO:0006810,GO:0015171,GO:0003333	LOC_Os02g43860.1	amino acid permease, putative, expressed
AT1G05950.1	47	36	47	36	-0.39218	hypothetical protein			PTHR33913,PTHR33913:SF1			LOC_Os09g33940.1	expressed protein
AT1G05960.2	457	387	454	388	-0.226702	ARM repeat superfamily protein			PTHR12444,PTHR12444:SF2	KOG1877		LOC_Os01g67290.1	cyclin-related protein, putative, expressed
AT1G05970.2	54	42	54	42	-0.349583	RNA-binding (RRM/RBD/RNP motifs) family protein			PTHR36309,PTHR36309:SF1			LOC_Os09g02400.3	RNA-binding region RNP-1, putative, expressed
AT1G06000.1	718	264	714	265	-1.43272	UDP-Glycosyltransferase superfamily protein		PF00201	PTHR11926,PTHR11926:SF282	KOG1192	GO:0016758,GO:0008152	LOC_Os08g38160.1	cytokinin-O-glucosyltransferase, putative, expressed
AT1G06010.1	97	94	96	94	-0.0243867	basic leucine zipper/W2 domain protein						LOC_Os04g56610.1	expressed protein
AT1G06020.1	45	39	44	39	-0.176994	pfkB-like carbohydrate kinase family protein		PF00294	PTHR10584,PTHR10584:SF168	KOG2855		LOC_Os01g66940.1	kinase, pfkB family, putative, expressed
AT1G06030.1	29	37	29	37	0.364935	pfkB-like carbohydrate kinase family protein		PF00294	PTHR10584,PTHR10584:SF168	KOG2855		LOC_Os01g66940.1	kinase, pfkB family, putative, expressed
AT1G06040.1	2039	1807	2028	1814	-0.16083	B-box zinc finger family protein	STO	PF00643	PTHR31832,PTHR31832:SF8		GO:0008270,GO:0005622	LOC_Os04g41560.2	B-box zinc finger family protein, putative, expressed
AT1G06045.1	626	490	622	491	-0.340203	hypothetical protein
AT1G06050.1	75	43	75	43	-0.789009	ENHANCED DISEASE RESISTANCE-like protein (DUF1336)		PF07059	PTHR12136,PTHR12136:SF61			LOC_Os08g05640.2	DUF1336 domain containing protein, expressed
AT1G06060.1	115	116	114	116	0.0259273	LisH and RanBPM domains containing protein		PF10607	PTHR12864	KOG2659		LOC_Os01g56820.1	AGAP000951-PA, putative, expressed
AT1G06070.1	281	280	279	281	0.0109692	Basic-leucine zipper (bZIP) transcription factor family protein		PF00170	PTHR13690,PTHR13690:SF80		GO:0043565,GO:0006355,GO:0003700	LOC_Os09g34060.1	transcription factor RF2a, putative, expressed
AT1G06080.1	33	20	32	20	-0.687148	delta 9 desaturase 1	ADS1	PF00487	PTHR11351,PTHR11351:SF2	KOG1600	GO:0006629
AT1G06090.1	10	7	10	7	-0.500298	Fatty acid desaturase family protein		PF00487	PTHR11351,PTHR11351:SF2	KOG1600	GO:0006629
AT1G06100.1	2	5	2	5	1.33539	Fatty acid desaturase family protein		PF00487	PTHR11351,PTHR11351:SF2	KOG1600	GO:0006629
AT1G06110.1	209	215	207	216	0.057796	SKP1/ASK-interacting protein 16	SKIP16	PF09346,PF04379	PTHR14289,PTHR14289:SF16	KOG4408		LOC_Os11g16390.1	expressed protein
AT1G06130.1	131	128	130	128	-0.019993	glyoxalase 2-4	GLX2-4	PF00753,PF16123	PTHR11935,PTHR11935:SF7	KOG0813	GO:0019243,GO:0004416	LOC_Os09g34100.1	metallo-beta-lactamase family protein, putative, expressed
AT1G06140.1	9	9	9	9	0.0134623	Pentatricopeptide repeat (PPR) superfamily protein	MEF3	PF13041,PF01535	PTHR24015,PTHR24015:SF638			LOC_Os09g07780.1	pentatricopeptide repeat protein PPR986-12, putative, expressed
AT1G06143.1	37	39	36	39	0.109091	basic helix loop helix DNA-binding superfamily protein		PF01535,PF13041	PTHR24015,PTHR24015:SF593			LOC_Os07g44299.1	pentatricopeptide, putative, expressed
AT1G06150.2	65	43	64	43	-0.587456	basic helix loop helix (bHLH) DNA-binding superfamily protein	EMB1444	PF14215	PTHR13902,PTHR13902:SF55			LOC_Os11g06010.1	helix-loop-helix DNA-binding protein, putative, expressed
AT1G06180.1	5	4	5	4	-0.308466	myb domain protein 13	MYB13	PF00249	PTHR10641,PTHR10641:SF523			LOC_Os02g41510.1	MYB family transcription factor, putative, expressed
AT1G06190.5	601	636	598	638	0.0940091	Rho termination factor	RHON1	PF07498	PTHR34449,PTHR34449:SF2		GO:0006353	LOC_Os03g08480.1	rho termination factor, N-terminal domain containing protein, expressed
AT1G06200.2	143	189	142	190	0.41567	Peptidase S24/S26A/S26B/S26C family protein			PTHR12383,PTHR12383:SF5	KOG1568	GO:0016020,GO:0008236,GO:0006508	LOC_Os04g01240.1	serine-type peptidase, putative, expressed
AT1G06210.1	276	264	275	265	-0.0535381	ENTH/VHS/GAT family protein		PF03127,PF00790	PTHR13856,PTHR13856:SF92	KOG1087	GO:0006886,GO:0005622	LOC_Os10g42724.1	VHS and GAT domain containing protein, expressed
AT1G06220.1	96	107	95	107	0.170813	Ribosomal protein S5/Elongation factor G/III/V family protein	MEE5	PF01926,PF03144,PF03764,PF00679,PF16004	PTHR23115,PTHR23115:SF5		GO:0005525	LOC_Os06g40600.1	elongation factor, putative, expressed
AT1G06230.1	797	739	792	741	-0.0956079	global transcription factor group E4	GTE4	PF00439,PF17035	PTHR22880,PTHR22880:SF172	KOG1474	GO:0005515	LOC_Os02g15220.1	bromodomain containing protein, expressed
AT1G06240.1	241	176	239	176	-0.441127	diiron containing four-helix bundle family ferritin protein, putative (Protein of unknown function DUF455)		PF04305	PTHR21496,PTHR21496:SF8			LOC_Os01g11590.2	uncharacterized protein HI0077, putative, expressed
AT1G06250.1	50	49	50	49	-0.0153036	alpha/beta-Hydrolases superfamily protein		PF01764	PTHR31828,PTHR31828:SF1	KOG4569	GO:0006629	LOC_Os05g49840.1	phospholipase, putative, expressed
AT1G06260.1	25	27	25	27	0.124283	Cysteine proteinases superfamily protein		PF08246,PF00112	PTHR12411,PTHR12411:SF382	KOG1543	GO:0008234,GO:0006508	LOC_Os04g13090.1	vignain precursor, putative, expressed
AT1G06270.1	56	44	55	44	-0.321685	Pentatricopeptide repeat (PPR) superfamily protein		PF13041	PTHR24015			LOC_Os09g02260.1	PPR repeat containing protein, putative, expressed
AT1G06290.1	499	438	496	439	-0.176359	acyl-CoA oxidase 3	ACX3	PF00441,PF02770,PF01756	PTHR10909,PTHR10909:SF11		GO:0055114,GO:0016627,GO:0003995,GO:0006635,GO:0005777,GO:0003997	LOC_Os06g24704.1	acyl-coenzyme A oxidase, putative, expressed
AT1G06310.1	8	9	7	9	0.192959	acyl-CoA oxidase 6	ACX6	PF00441,PF01756,PF02770	PTHR10909,PTHR10909:SF11		GO:0055114,GO:0016627,GO:0006635,GO:0005777,GO:0003997,GO:0003995	LOC_Os06g24704.1	acyl-coenzyme A oxidase, putative, expressed
AT1G06340.1	62	26	61	26	-1.25683	Plant Tudor-like protein		PF05641	PTHR31917			LOC_Os05g04180.1	agenet domain containing protein, putative, expressed
AT1G06350.1	2319	2234	2307	2242	-0.0407202	Fatty acid desaturase family protein	ADS4	PF00487	PTHR11351,PTHR11351:SF2	KOG1600	GO:0006629
AT1G06360.2	3	5	3	5	0.750233	Fatty acid desaturase family protein		PF00487	PTHR11351,PTHR11351:SF2	KOG1600	GO:0006629
AT1G06380.1	61	70	61	70	0.201401	Ribosomal protein L1p/L10e family		PF00687	PTHR23105,PTHR23105:SF31	KOG1685		LOC_Os05g48422.1	60S ribosomal protein-related, putative, expressed
AT1G06390.1	210	230	209	230	0.141342	GSK3/SHAGGY-like protein kinase 1	GSK1	PF07714	PTHR24057,PTHR24057:SF12		GO:0006468,GO:0004672	LOC_Os05g11730.1	CGMC_GSK.7 - CGMC includes CDA, MAPK, GSK3, and CLKC kinases, expressed
AT1G06400.1	400	596	398	598	0.587503	Ras-related small GTP-binding family protein	ARA-2	PF00025	PTHR24073,PTHR24073:SF544	KOG0087	GO:0005525	LOC_Os06g35814.1	ras-related protein, putative, expressed
AT1G06410.1	221	449	219	451	1.03921	trehalose-phosphatase/synthase 7	TPS7	PF02358,PF00982	PTHR10788,PTHR10788:SF18		GO:0005992,GO:0003824	LOC_Os05g44100.1	trehalose synthase, putative, expressed
AT1G06420.1	89	124	89	124	0.491779	DNA ligase-like protein
AT1G06430.1	1088	761	1082	764	-0.502534	FTSH protease 8	FTSH8	PF07728,PF06480,PF01434	PTHR23076,PTHR23076:SF60		GO:0016887,GO:0005524,GO:0016021,GO:0008270,GO:0004222,GO:0006508	LOC_Os06g45820.1	OsFtsH2 FtsH protease, homologue of AtFtsH2/8, expressed
AT1G06440.1	17	39	16	39	1.25465	Ubiquitin carboxyl-terminal hydrolase family protein		PF11955	PTHR31476,PTHR31476:SF15			LOC_Os10g36680.1	ubiquitin carboxyl-terminal hydrolase, family 1, putative, expressed
AT1G06450.1	98	106	97	106	0.126786	Polynucleotidyl transferase, ribonuclease H-like superfamily protein		PF04857	PTHR10797,PTHR10797:SF0	KOG0304	GO:0005634	LOC_Os02g55300.1	CAF1 family ribonuclease containing protein, putative, expressed
AT1G06460.1	184	180	183	181	-0.0142677	alpha-crystallin domain 32.1	ACD32.1	PF00011	PTHR11527,PTHR11527:SF134	KOG0710		LOC_Os02g12610.1	hsp20/alpha crystallin family protein, putative, expressed
AT1G06470.1	173	252	172	252	0.557464	Nucleotide/sugar transporter family protein		PF08449	PTHR11132,PTHR11132:SF121	KOG1443	GO:0055085	LOC_Os06g05980.1	transporter family protein, putative, expressed
AT1G06475.1	32	84	32	84	1.40551	transmembrane protein			PTHR33726,PTHR33726:SF3			LOC_Os05g49080.1	expressed protein
AT1G06490.1	171	127	170	127	-0.421487	glucan synthase-like 7	CalS7	PF04652,PF14288,PF02364	PTHR12741,PTHR12741:SF16		GO:0016020,GO:0006075,GO:0003843,GO:0000148	LOC_Os03g03610.2	1,3-beta-glucan synthase component domain containing protein, expressed
AT1G06500.1	31	45	30	45	0.574785	hypothetical protein
AT1G06510.1	114	94	113	94	-0.26475	forkhead-associated domain protein			PTHR37174			LOC_Os01g50120.1	expressed protein
AT1G06515.1	133	198	132	198	0.583818	transmembrane protein, putative (DUF3317)		PF11779	PTHR33727			LOC_Os07g26550.1	expressed protein
AT1G06520.1	1322	951	1314	955	-0.4612	glycerol-3-phosphate acyltransferase 1	GPAT1	PF01553	PTHR15486,PTHR15486:SF0		GO:0016746,GO:0008152	LOC_Os01g44069.1	glycerol-3-phosphate acyltransferase, putative, expressed
AT1G06530.1	589	649	585	651	0.153398	Tropomyosin-like protein	PMD2		PTHR18937,PTHR18937:SF242
AT1G06540.1	611	682	608	684	0.170882	hypothetical protein
AT1G06550.1	2663	2677	2649	2687	0.0207688	ATP-dependent caseinolytic (Clp) protease/crotonase family protein		PF16113	PTHR11941,PTHR11941:SF94	KOG1684		LOC_Os01g54860.1	enoyl-CoA hydratase/isomerase family protein, putative, expressed
AT1G06560.1	137	136	136	137	0.00279463	NOL1/NOP2/sun family protein		PF01472,PF01189	PTHR22807,PTHR22807:SF34	KOG1122	GO:0003723,GO:0008168	LOC_Os08g27824.1	NOL1/NOP2/sun family protein, putative, expressed
AT1G06570.1	471	269	468	270	-0.795817	4-hydroxyphenylpyruvate dioxygenase	PDS1	PF00903	PTHR11959,PTHR11959:SF1		GO:0055114,GO:0016701,GO:0009072,GO:0003868	LOC_Os02g07160.1	glyoxalase family protein, putative, expressed
AT1G06580.1	47	47	46	47	0.0136431	Pentatricopeptide repeat (PPR) superfamily protein		PF13041	PTHR24015,PTHR24015:SF416			LOC_Os03g06910.1	PPR repeat containing protein, expressed
AT1G06590.1	100	75	99	75	-0.411111	anaphase-promoting complex subunit		PF12862	PTHR12830,PTHR12830:SF9			LOC_Os12g43120.1	expressed protein
AT1G06620.1	5	6	5	6	0.275548	2-oxoglutarate (2OG) and Fe(II)-dependent oxygenase superfamily protein		PF14226,PF03171	PTHR10209,PTHR10209:SF122	KOG0143	GO:0055114,GO:0016491	LOC_Os03g48430.1	1-aminocyclopropane-1-carboxylate oxidase homolog 4, putative, expressed
AT1G06630.1	147	179	146	180	0.302464	F-box/RNI-like superfamily protein		PF00646	PTHR31639,PTHR31639:SF6		GO:0005515	LOC_Os10g03910.1	OsFBX354 - F-box domain containing protein, expressed
AT1G06640.1	871	1798	866	1805	1.0591	2-oxoglutarate (2OG) and Fe(II)-dependent oxygenase superfamily protein		PF14226,PF03171	PTHR10209,PTHR10209:SF122	KOG0143	GO:0055114,GO:0016491	LOC_Os04g10350.1	1-aminocyclopropane-1-carboxylate oxidase homolog 2, putative, expressed
AT1G06645.1	116	135	115	135	0.227134	2-oxoglutarate (2OG) and Fe(II)-dependent oxygenase superfamily protein		PF14226,PF03171	PTHR10209,PTHR10209:SF122	KOG0143	GO:0055114,GO:0016491	LOC_Os03g48430.1	1-aminocyclopropane-1-carboxylate oxidase homolog 4, putative, expressed
AT1G06650.2	356	297	354	298	-0.248267	2-oxoglutarate (2OG) and Fe(II)-dependent oxygenase superfamily protein		PF14226,PF03171	PTHR10209,PTHR10209:SF122	KOG0143	GO:0055114,GO:0016491	LOC_Os03g48430.1	1-aminocyclopropane-1-carboxylate oxidase homolog 4, putative, expressed
AT1G06660.1	33	42	32	42	0.365757	aspartyl/glutamyl-tRNA(Asn/Gln) amidotransferase subunit	JASON		PTHR33318,PTHR33318:SF7			LOC_Os02g07180.1	expressed protein
AT1G06670.1	271	271	270	272	0.0136366	nuclear DEIH-boxhelicase	NIH	PF07717,PF01424,PF00270,PF00271,PF04408	PTHR18934,PTHR18934:SF115		GO:0003676,GO:0005524,GO:0004386	LOC_Os01g56190.1	HVT1, putative, expressed
AT1G06680.1	14998	16073	14917	16136	0.113274	photosystem II subunit P-1	PSBP-1	PF01789	PTHR31407,PTHR31407:SF6		GO:0019898,GO:0015979,GO:0009654,GO:0009523,GO:0005509	LOC_Os07g04840.1	PsbP, putative, expressed
AT1G06690.1	739	583	735	585	-0.328935	NAD(P)-linked oxidoreductase superfamily protein		PF00248	PTHR11732,PTHR11732:SF213	KOG1575		LOC_Os07g05000.1	oxidoreductase, aldo/keto reductase family protein, putative, expressed
AT1G06700.1	218	235	217	235	0.118489	Protein kinase superfamily protein		PF07714	PTHR27001,PTHR27001:SF115	KOG1187	GO:0006468,GO:0004672	LOC_Os03g62700.1	protein kinase, putative, expressed
AT1G06710.12	7	8	6	8	0.219437	Tetratricopeptide repeat (TPR)-like superfamily protein		PF13812,PF01535,PF13041	PTHR24015,PTHR24015:SF430			LOC_Os04g41140.1	PPR repeat containing protein, expressed
AT1G06720.2	108	94	107	94	-0.194439	P-loop containing nucleoside triphosphate hydrolases superfamily protein		PF08142,PF04950	PTHR12858,PTHR12858:SF2	KOG1980	GO:0042254,GO:0005634	LOC_Os03g21530.1	AARP2CN domain containing protein, expressed
AT1G06730.1	184	152	183	153	-0.262189	pfkB-like carbohydrate kinase family protein		PF00294	PTHR10584,PTHR10584:SF184	KOG2855		LOC_Os03g06880.1	kinase, pfkB family, putative, expressed
AT1G06740.1	81	77	81	77	-0.0688139	MuDR family transposase	MUG3	PF04434,PF10551,PF03108	PTHR31973,PTHR31973:SF16		GO:0008270	ChrUn.fgenesh.mRNA.23	expressed protein
AT1G06760.1	1771	1818	1762	1825	0.0508268	winged-helix DNA-binding transcription factor family protein		PF00538	PTHR11467,PTHR11467:SF48		GO:0006334,GO:0005634,GO:0003677,GO:0000786	LOC_Os07g08710.1	AT hook-containing DNA-binding protein, putative, expressed
AT1G06770.1	51	67	50	67	0.42123	DREB2A-interacting protein 1	DRIP1	PF00097	PTHR10825,PTHR10825:SF3	KOG2660	GO:0046872	LOC_Os03g43360.2	zinc finger, C3HC4 type domain containing protein, expressed
AT1G06780.2	84	91	84	91	0.121073	galacturonosyltransferase 6	GAUT6	PF01501	PTHR32116,PTHR32116:SF0		GO:0016757,GO:0047262	LOC_Os11g37980.1	GAUT2/LGT2, putative, expressed
AT1G06790.1	57	82	56	82	0.54173	RNA polymerase Rpb7 N-terminal domain-containing protein		PF03876,PF08292	PTHR12709,PTHR12709:SF1	KOG3297	GO:0006351,GO:0003899	LOC_Os07g29420.3	DNA-directed RNA polymerase III subunit RPC8, putative, expressed
AT1G06800.1	157	157	156	158	0.0182336	alpha/beta-Hydrolases superfamily protein	PLA-I{gamma}1	PF01764	PTHR31403,PTHR31403:SF7	KOG4569	GO:0006629	LOC_Os05g32380.1	phospholipase, putative, expressed
AT1G06820.1	360	309	358	310	-0.209302	carotenoid isomerase	CRTISO	PF01593	PTHR10668,PTHR10668:SF5		GO:0055114,GO:0016491	LOC_Os11g36440.1	amine oxidase, flavin-containing, domain containing protein, expressed
AT1G06830.1	14	19	14	19	0.454035	Glutaredoxin family protein		PF00462	PTHR10168,PTHR10168:SF57	KOG1752	GO:0045454,GO:0015035,GO:0009055	LOC_Os12g35330.1	OsGrx_C12 - glutaredoxin subgroup III, expressed
AT1G06840.1	210	205	209	206	-0.0213057	Leucine-rich repeat protein kinase family protein		PF08263,PF13855,PF07714	PTHR27003,PTHR27003:SF36	KOG1187	GO:0005515,GO:0006468,GO:0004672	LOC_Os01g72990.2	expressed protein
AT1G06850.1	205	169	203	170	-0.261728	basic leucine-zipper 52	bZIP52	PF00170	PTHR13690,PTHR13690:SF82		GO:0043565,GO:0006355,GO:0003700	LOC_Os03g21800.1	bZIP transcription factor family protein, putative, expressed
AT1G06870.1	286	331	284	332	0.224521	Peptidase S24/S26A/S26B/S26C family protein	Plsp2A	PF10502	PTHR12383,PTHR12383:SF15	KOG0171	GO:0016020,GO:0008236,GO:0006508	LOC_Os09g28000.1	OsSigP6 - Putative Type I Signal Peptidase homologue; employs a putative Ser/Lys catalytic dyad, expressed
AT1G06890.1	218	255	217	256	0.236755	nodulin MtN21 /EamA-like transporter family protein		PF03151	PTHR11132,PTHR11132:SF98	KOG1441		LOC_Os01g07310.1	transporter-related, putative, expressed
AT1G06900.1	480	396	477	398	-0.264026	Insulinase (Peptidase family M16) family protein		PF05193,PF00675,PF16187	PTHR11851,PTHR11851:SF123			LOC_Os03g21810.1	insulin-degrading enzyme, putative, expressed
AT1G06910.1	64	60	63	60	-0.0806356	TRF-like 7	TRFL7		PTHR21717			LOC_Os06g08290.1	MYB family transcription factor, putative, expressed
AT1G06920.1	3	5	2	5	0.861568	ovate family protein 4	OFP4	PF13724,PF04844	PTHR33057,PTHR33057:SF22		GO:0003677	LOC_Os01g60810.1	DUF623 domain containing protein, expressed
AT1G06950.1	1506	1102	1498	1106	-0.437791	translocon at the inner envelope membrane of chloroplasts 110	TIC110	PF16940	PTHR34935			LOC_Os10g35010.1	ATTIC110/TIC110, putative, expressed
AT1G06960.1	143	151	142	151	0.0919271	RNA-binding (RRM/RBD/RNP motifs) family protein		PF13893,PF00076	PTHR10501	KOG4206	GO:0003676,GO:0017069,GO:0000398	LOC_Os03g18720.1	RNA recognition motif containing protein, putative, expressed
AT1G06970.1	7	7	6	7	0.120663	cation/hydrogen exchanger 14	CHX14	PF00999	PTHR32468,PTHR32468:SF23		GO:0055085,GO:0016021,GO:0015299,GO:0006812	LOC_Os05g40650.1	ATCHX, putative, expressed
AT1G06980.1	4	12	4	12	1.53678	6,7-dimethyl-8-ribityllumazine synthase		PF14009	PTHR33052,PTHR33052:SF26			LOC_Os01g07150.1	expressed protein
AT1G07000.1	64	85	63	85	0.434206	exocyst subunit exo70 family protein B2	EXO70B2	PF03081	PTHR12542,PTHR12542:SF29		GO:0006887,GO:0000145	LOC_Os01g61180.1	exo70 exocyst complex subunit domain containing protein, expressed
AT1G07010.3	735	379	731	380	-0.943032	Calcineurin-like metallo-phosphoesterase superfamily protein	SLP1	PF00149	PTHR11668,PTHR11668:SF267	KOG0374	GO:0016787	LOC_Os10g25430.1	Ser/Thr protein phosphatase family protein, putative, expressed
AT1G07020.1	109	126	108	126	0.223437	hypothetical protein			PTHR37175,PTHR37175:SF1			LOC_Os01g38490.1	expressed protein
AT1G07030.1	246	188	245	188	-0.378306	Mitochondrial substrate carrier family protein		PF00153	PTHR24089,PTHR24089:SF308	KOG0760		LOC_Os03g18550.1	mitochondrial carrier protein, putative, expressed
AT1G07040.1	369	341	367	342	-0.0984456	plant/protein		PF07063	PTHR31136,PTHR31136:SF1			LOC_Os10g32680.1	expressed protein
AT1G07070.1	128	147	127	147	0.20819	Ribosomal protein L35Ae family protein		PF01247	PTHR10902	KOG0887	GO:0006412,GO:0005840,GO:0005622,GO:0003735	LOC_Os02g54470.2	60S ribosomal protein L35a-3, putative, expressed
AT1G07080.1	1021	899	1016	902	-0.170895	Thioredoxin superfamily protein		PF03227	PTHR13234,PTHR13234:SF8	KOG3160		LOC_Os03g18454.1	gamma-interferon-inducible lysosomal thiol reductase precursor, putative, expressed
AT1G07090.1	548	532	545	534	-0.0279602	LIGHT-DEPENDENT SHORT HYPOCOTYLS-like protein (DUF640)	LSH6	PF04852	PTHR31165,PTHR31165:SF6			LOC_Os02g41460.1	DUF640 domain containing protein, putative, expressed
AT1G07110.1	805	520	800	522	-0.617469	fructose-2,6-bisphosphatase	F2KP	PF00300,PF01591	PTHR10606,PTHR10606:SF44		GO:0006000,GO:0005524,GO:0003873,GO:0006003,GO:0003824	LOC_Os05g07130.1	6PF-2-K/Fru-2,6-P2ASE liver isozyme, putative, expressed
AT1G07120.1	36	23	35	23	-0.64461	CHUP1-like protein			PTHR31342,PTHR31342:SF9			LOC_Os03g18300.1	chloroplast unusual positioning protein, putative, expressed
AT1G07130.1	74	84	74	84	0.187966	Nucleic acid-binding, OB-fold-like protein	STN1	PF01336	PTHR13989		GO:0003676	LOC_Os03g25130.1	OB-fold nucleic acid binding domain containing protein, putative, expressed
AT1G07135.1	372	269	370	270	-0.456947	glycine-rich protein
AT1G07140.1	1507	1772	1498	1779	0.247636	Pleckstrin homology (PH) domain superfamily protein	SIRANBP	PF00568	PTHR23138,PTHR23138:SF93	KOG0864		LOC_Os05g28290.1	ranBP1 domain containing protein, expressed
AT1G07150.1	13	11	13	11	-0.294931	mitogen-activated protein kinase kinase kinase 13	MAPKKK13	PF00069	PTHR24361,PTHR24361:SF390	KOG0198	GO:0006468,GO:0005524,GO:0004672	LOC_Os03g18170.1	STE_MEKK_ste11_MAP3K.13 - STE kinases include homologs to sterile 7, sterile 11 and sterile 20 from yeast, expressed
AT1G07170.1	68	95	67	95	0.50648	PHF5-like protein		PF03660	PTHR13120	KOG1705		LOC_Os05g30410.1	PHF5-like protein domain containing protein, expressed
AT1G07180.1	516	516	513	518	0.013411	alternative NAD(P)H dehydrogenase 1	NDA1	PF00070	PTHR22912		GO:0055114,GO:0016491	LOC_Os01g61410.1	NADH-ubiquinone oxidoreductase, mitochondrial precursor, putative, expressed
AT1G07200.2	470	297	467	298	-0.648763	Double Clp-N motif-containing P-loop nucleoside triphosphate hydrolases superfamily protein			PTHR11638,PTHR11638:SF68			LOC_Os11g01330.1	expressed protein
AT1G07210.1	265	261	263	262	-0.00843239	Ribosomal protein S18		PF01084	PTHR13479,PTHR13479:SF44	KOG3162	GO:0006412,GO:0005840,GO:0005622,GO:0003735	LOC_Os10g35690.1	ribosomal protein S18 containing protein, expressed
AT1G07220.1	189	245	188	245	0.384876	O-glucosyltransferase rumi-like protein (DUF821)		PF05686	PTHR12203,PTHR12203:SF13			LOC_Os05g05690.1	DTA2, putative, expressed
AT1G07230.1	497	442	494	444	-0.154307	non-specific phospholipase C1	NPC1	PF04185	PTHR31956,PTHR31956:SF9		GO:0016788	LOC_Os03g61130.1	phosphoesterase family protein, putative, expressed
AT1G07240.1	52	96	51	96	0.904516	UDP-glucosyl transferase 71C5	UGT71C5	PF00201	PTHR11926,PTHR11926:SF242	KOG1192	GO:0016758,GO:0008152	LOC_Os07g32010.1	UDP-glucoronosyl and UDP-glucosyl transferase domain containing protein, expressed
AT1G07250.1	489	359	486	360	-0.432372	UDP-glucosyl transferase 71C4	UGT71C4	PF00201	PTHR11926,PTHR11926:SF374	KOG1192	GO:0016758,GO:0008152	LOC_Os07g32010.1	UDP-glucoronosyl and UDP-glucosyl transferase domain containing protein, expressed
AT1G07260.1	38	40	38	40	0.06929	UDP-glucosyl transferase 71C3	UGT71C3	PF00201	PTHR11926,PTHR11926:SF242	KOG1192	GO:0016758,GO:0008152	LOC_Os07g37690.1	UDP-glucoronosyl and UDP-glucosyl transferase domain containing protein, expressed
AT1G07270.1	8	6	7	6	-0.309207	Cell division control, Cdc6		PF09079,PF13401	PTHR10763	KOG2227		LOC_Os01g63710.3	CDC6 - Putative DNA replication initiation protein, expressed
AT1G07280.1	27	26	26	26	-0.0426606	Tetratricopeptide repeat (TPR)-like superfamily protein		PF13432	PTHR26312,PTHR26312:SF87			LOC_Os01g63620.1	expressed protein
AT1G07290.1	13	20	13	20	0.634666	golgi nucleotide sugar transporter 2	GONST2		PTHR11132,PTHR11132:SF81	KOG1444		LOC_Os03g61100.1	GDP-mannose transporter, putative, expressed
AT1G07300.3	61	82	60	82	0.443306	josephin protein-like protein			PTHR34355,PTHR34355:SF1	KOG2934		LOC_Os01g63500.1	expressed protein
AT1G07310.1	493	459	490	461	-0.089656	Calcium-dependent lipid-binding (CaLB domain) family protein		PF00168	PTHR32246,PTHR32246:SF19		GO:0005515	LOC_Os01g63470.1	C2 domain containing protein, expressed
AT1G07320.1	2975	3094	2959	3106	0.0702322	ribosomal protein L4	RPL4	PF00573	PTHR10746,PTHR10746:SF10	KOG1624	GO:0006412,GO:0005840,GO:0003735	LOC_Os03g15870.1	ribosomal protein L4, putative, expressed
AT1G07330.2	13	4	12	4	-1.63025	dentin sialophosphoprotein			PTHR33870			LOC_Os01g59670.1	expressed protein
AT1G07350.1	298	227	296	227	-0.379835	RNA-binding (RRM/RBD/RNP motifs) family protein	SR45a	PF00076	PTHR15241,PTHR15241:SF4		GO:0003676	LOC_Os03g15890.1	RNA recognition motif containing protein, expressed
AT1G07360.1	401	453	399	455	0.189445	CCCH-type zinc fingerfamily protein with RNA-binding domain-containing protein	MAC5A	PF16131,PF00076	PTHR14089,PTHR14089:SF6		GO:0003676	LOC_Os06g07350.1	RNA-binding motif protein, putative, expressed
AT1G07370.1	230	292	228	293	0.358518	proliferating cellular nuclear antigen 1	PCNA1	PF04139	PTHR11352	KOG1636	GO:0030896,GO:0000077,GO:0030337,GO:0006275,GO:0003677	LOC_Os02g56130.1	PCNA - Putative DNA replicative polymerase clamp, expressed
AT1G07380.2	58	38	57	38	-0.583704	Neutral/alkaline non-lysosomal ceramidase		PF17048,PF04734	PTHR12670,PTHR12670:SF4			LOC_Os01g43520.1	neutral ceramidase precursor, putative, expressed
AT1G07390.3	35	26	35	26	-0.415593	receptor like protein 1	RLP1	PF08263,PF00560,PF12799,PF13855	PTHR27004,PTHR27004:SF17	KOG0472	GO:0005515	LOC_Os04g55440.1	Cf-4A protein, putative, expressed
AT1G07400.1	78	34	77	34	-1.17522	HSP20-like chaperones superfamily protein		PF00011	PTHR11527,PTHR11527:SF158	KOG0710		LOC_Os03g15960.1	hsp20/alpha crystallin family protein, putative, expressed
AT1G07410.1	55	77	55	77	0.498815	RAB GTPase homolog A2B	RABA2b	PF00025	PTHR24073,PTHR24073:SF484	KOG0087	GO:0005525	LOC_Os03g60870.1	ras-related protein, putative, expressed
AT1G07420.1	178	215	177	215	0.282741	sterol 4-alpha-methyl-oxidase 2-1	SMO2-1	PF04116	PTHR11863,PTHR11863:SF27	KOG0873	GO:0055114,GO:0016491,GO:0006633,GO:0005506	LOC_Os07g01150.3	fatty acid hydroxylase, putative, expressed
AT1G07430.1	142	28	141	28	-2.35518	highly ABA-induced PP2C protein 2	HAI2	PF00481	PTHR13832,PTHR13832:SF219	KOG0698	GO:0003824,GO:0006470,GO:0004722	LOC_Os01g62760.1	protein phosphatase 2C, putative, expressed
AT1G07440.1	450	443	447	445	-0.00767371	NAD(P)-binding Rossmann-fold superfamily protein		PF08659	PTHR24322,PTHR24322:SF623	KOG0725		LOC_Os03g16220.1	oxidoreductase, short chain dehydrogenase/reductase family domain containing protein, expressed
AT1G07450.1	254	206	253	206	-0.292214	NAD(P)-binding Rossmann-fold superfamily protein		PF13561	PTHR24322,PTHR24322:SF641	KOG0725		LOC_Os03g16220.1	oxidoreductase, short chain dehydrogenase/reductase family domain containing protein, expressed
AT1G07470.1	357	297	355	298	-0.250037	Transcription factor IIA, alpha/beta subunit		PF03153	PTHR12694,PTHR12694:SF8	KOG2652	GO:0006367,GO:0005672	LOC_Os05g22670.1	transcription factor IIA large subunit, putative, expressed
AT1G07480.3	353	312	351	313	-0.166913	Transcription factor IIA, alpha/beta subunit		PF03153	PTHR12694,PTHR12694:SF8	KOG2652	GO:0006367,GO:0005672	LOC_Os05g22670.1	transcription factor IIA large subunit, putative, expressed
AT1G07485.1	96	75	95	75	-0.342872	hypothetical protein
AT1G07490.1	96	75	95	75	-0.342833	ROTUNDIFOLIA like 3	RTFL3	PF08137	PTHR33102,PTHR33102:SF3			LOC_Os01g62605.1	expressed protein
AT1G07510.1	808	825	803	828	0.0444471	FTSH protease 10	ftsh10	PF06480,PF00004,PF01434	PTHR23076,PTHR23076:SF69		GO:0016021,GO:0008270,GO:0005524,GO:0004222,GO:0006508	LOC_Os05g38400.1	OsFtsH8 FtsH protease, homologue of AtFtsH3/10, expressed
AT1G07520.3	110	132	109	132	0.271096	GRAS family transcription factor		PF03514	PTHR31636,PTHR31636:SF54			LOC_Os03g48450.4	SCARECROW, putative, expressed
AT1G07530.1	445	456	442	458	0.0502336	SCARECROW-like 14	SCL14	PF03514	PTHR31636,PTHR31636:SF54			LOC_Os03g48450.2	SCARECROW, putative, expressed
AT1G07570.3	35	29	35	29	-0.282912	Protein kinase superfamily protein	APK1A	PF07714	PTHR27001,PTHR27001:SF191	KOG1187	GO:0006468,GO:0004672	LOC_Os05g02020.2	protein kinase APK1A, chloroplast precursor, putative, expressed
AT1G07590.1	876	965	871	968	0.152339	Tetratricopeptide repeat (TPR)-like superfamily protein		PF01535,PF13041	PTHR24015,PTHR24015:SF588			LOC_Os08g06500.1	PPR repeat domain containing protein, putative, expressed
AT1G07600.1	776	874	771	877	0.185178	metallothionein 1A	MT1A			KOG4738
AT1G07610.1	7	4	6	4	-0.880721	metallothionein 1C	MT1C			KOG4738
AT1G07615.1	101	89	100	89	-0.169016	GTP-binding protein Obg/CgtA		PF01926,PF01018	PTHR11702,PTHR11702:SF31	KOG1489	GO:0005525	LOC_Os11g47800.1	spo0B-associated GTP-binding protein, putative, expressed
AT1G07630.1	203	199	202	199	-0.018825	pol-like 5	PLL5	PF00481	PTHR13832,PTHR13832:SF228	KOG0700	GO:0003824,GO:0006470,GO:0004722	LOC_Os03g60650.1	protein phosphatase 2C, putative, expressed
AT1G07640.3	457	323	455	324	-0.487225	Dof-type zinc finger DNA-binding family protein	OBP2	PF02701	PTHR31992,PTHR31992:SF8		GO:0006355,GO:0003677	LOC_Os07g13260.1	dof zinc finger domain containing protein, putative, expressed
AT1G07650.2	137	241	136	241	0.825311	Leucine-rich repeat transmembrane protein kinase		PF00560,PF13855,PF07714,PF11721	PTHR27006,PTHR27006:SF37	KOG1187	GO:0005515,GO:0006468,GO:0004672	LOC_Os09g17630.1	receptor-like protein kinase 2, putative, expressed
AT1G07660.1	326	436	324	437	0.43137	Histone superfamily protein		PF15511	PTHR10484	KOG3467		LOC_Os03g02780.1	Core histone H2A/H2B/H3/H4 domain containing protein, putative, expressed
AT1G07670.1	1112	1021	1106	1024	-0.109882	endomembrane-type CA-ATPase 4	ECA4	PF00690,PF12710,PF00689,PF00122	PTHR24093,PTHR24093:SF289		GO:0046872,GO:0000166	LOC_Os03g17310.1	calcium-transporting ATPase, endoplasmic reticulum-type, putative, expressed
AT1G07700.3	333	344	331	345	0.0625775	Thioredoxin superfamily protein		PF00085	PTHR10438,PTHR10438:SF229	KOG0907	GO:0045454,GO:0015035,GO:0006662	LOC_Os02g35900.1	thioredoxin, putative, expressed
AT1G07705.2	63	53	62	53	-0.225039	NOT2 / NOT3 / NOT5 family		PF04153	PTHR23326,PTHR23326:SF3		GO:0006355,GO:0005634	LOC_Os02g54120.3	CCR4-NOT transcription factor, putative, expressed
AT1G07710.1	130	127	129	127	-0.0257754	Ankyrin repeat family protein		PF13962,PF12796,PF13637	PTHR24186,PTHR24186:SF4	KOG0502,KOG0508,KOG4412		LOC_Os03g17250.1	ankyrin repeat-containing protein, putative, expressed
AT1G07720.2	1803	1768	1793	1774	-0.0152376	3-ketoacyl-CoA synthase 3	KCS3	PF08541	PTHR31561,PTHR31561:SF24		GO:0016747,GO:0008610,GO:0016020,GO:0006633	LOC_Os10g33370.1	3-ketoacyl-CoA synthase precursor, putative, expressed
AT1G07725.1	189	165	187	166	-0.178479	exocyst subunit exo70 family protein H6	EXO70H6	PF03081	PTHR12542,PTHR12542:SF26		GO:0006887,GO:0000145	LOC_Os01g69230.1	exo70 exocyst complex subunit domain containing protein, expressed
AT1G07730.2	23	33	23	33	0.534456	Disease resistance-responsive (dirigent-like protein) family protein		PF03018	PTHR21495,PTHR21495:SF41			LOC_Os01g06250.1	dirigent, putative, expressed
AT1G07740.1	49	54	48	54	0.168475	Tetratricopeptide repeat (TPR)-like superfamily protein		PF13812,PF01535,PF13041	PTHR24015,PTHR24015:SF734			LOC_Os05g47510.1	pentatricopeptide, putative, expressed
AT1G07745.1	63	61	63	61	-0.0326484	DNA repair RAD51-like protein	RAD51D	PF08423	PTHR22942,PTHR22942:SF29	KOG1564		LOC_Os09g01680.1	DNA repair protein RAD51 homolog 4, putative, expressed
AT1G07750.1	2156	2247	2144	2256	0.0731011	RmlC-like cupins superfamily protein		PF00190	PTHR31189,PTHR31189:SF8		GO:0045735	LOC_Os05g02520.1	cupin domain containing protein, expressed
AT1G07770.1	1035	1422	1029	1428	0.471801	ribosomal protein S15A	RPS15A	PF00410	PTHR11758,PTHR11758:SF16	KOG1754	GO:0006412,GO:0005840,GO:0003735	LOC_Os02g27760.1	40S ribosomal protein S15a, putative, expressed
AT1G07780.10	114	139	113	139	0.294499	phosphoribosylanthranilate isomerase 1	PAI1	PF00697	PTHR22854,PTHR22854:SF6	KOG4202	GO:0006568,GO:0004640	LOC_Os02g16630.1	tryptophan biosynthesis protein trpCF, putative, expressed
AT1G07790.1	556	563	553	565	0.0314457	Histone superfamily protein	HTB1	PF00125	PTHR23428	KOG1744	GO:0003677,GO:0000786	LOC_Os03g17084.1	Core histone H2A/H2B/H3/H4 domain containing protein, putative, expressed
AT1G07795.1	13	10	12	10	-0.308614	forkhead box protein G1			PTHR34658			LOC_Os12g37900.1	expressed protein
AT1G07810.1	1063	875	1057	879	-0.267209	ER-type Ca2+-ATPase 1	ECA1	PF00690,PF12710,PF00689,PF00122	PTHR24093,PTHR24093:SF289		GO:0046872,GO:0000166	LOC_Os03g17310.1	calcium-transporting ATPase, endoplasmic reticulum-type, putative, expressed
AT1G07820.1	929	1325	924	1330	0.525934	Histone superfamily protein		PF15511	PTHR10484	KOG3467		LOC_Os03g02780.1	Core histone H2A/H2B/H3/H4 domain containing protein, putative, expressed
AT1G07830.1	153	186	152	186	0.29142	ribosomal protein L29 family protein		PF00831	PTHR21183,PTHR21183:SF18	KOG3331	GO:0006412,GO:0005840,GO:0005622,GO:0003735,GO:0005761	LOC_Os06g03790.1	39S ribosomal protein L47, mitochondrial precursor, putative, expressed
AT1G07840.1	39	38	38	38	-0.00544484	Sas10/Utp3/C1D family		PF04000	PTHR13237	KOG3117		LOC_Os01g68310.1	sas10/Utp3 family protein, expressed
AT1G07870.2	156	277	155	278	0.838901	Protein kinase superfamily protein		PF00069	PTHR27001,PTHR27001:SF63	KOG1187	GO:0006468,GO:0005524,GO:0004672	LOC_Os07g49470.1	protein kinase APK1B, chloroplast precursor, putative, expressed
AT1G07880.2	29	44	28	44	0.623777	Protein kinase superfamily protein	ATMPK13	PF00069	PTHR24055,PTHR24055:SF185		GO:0006468,GO:0005524,GO:0004672	LOC_Os10g38950.1	CGMC_MAPKCMGC_2_ERK.14 - CGMC includes CDA, MAPK, GSK3, and CLKC kinases, expressed
AT1G07890.1	805	781	801	784	-0.0298246	ascorbate peroxidase 1	APX1	PF00141	PTHR31356,PTHR31356:SF10		GO:0055114,GO:0020037,GO:0006979,GO:0004601	LOC_Os07g49400.2	OsAPx2 - Cytosolic Ascorbate Peroxidase encoding gene 4,5,6,8, expressed
AT1G07900.1	3	7	3	7	1.12763	LOB domain-containing protein 1	LBD1	PF03195	PTHR31301,PTHR31301:SF14			LOC_Os03g17810.1	DUF260 domain containing protein, putative, expressed
AT1G07901.1	8	17	7	17	1.19513	hypothetical protein
AT1G07902.1	17	31	16	31	0.92356	hypothetical protein
AT1G07910.2	240	187	238	188	-0.343379	RNAligase	RNL	PF08302	PTHR35460,PTHR35460:SF1		GO:0006388,GO:0005524,GO:0003972	LOC_Os07g09400.1	RNA ligase isoform 1, putative, expressed
AT1G07920.1	16024	14488	15938	14546	-0.131885	GTP binding Elongation factor Tu family protein		PF03144,PF03143,PF00009	PTHR23115,PTHR23115:SF157		GO:0005525	LOC_Os03g08050.1	elongation factor Tu, putative, expressed
AT1G07930.1	9022	8493	8974	8527	-0.0736069	GTP binding Elongation factor Tu family protein		PF03144,PF03143,PF00009	PTHR23115,PTHR23115:SF157		GO:0005525	LOC_Os03g08050.1	elongation factor Tu, putative, expressed
AT1G07940.1	15507	13959	15424	14015	-0.1382	GTP binding Elongation factor Tu family protein		PF03144,PF03143,PF00009	PTHR23115,PTHR23115:SF157		GO:0005525	LOC_Os03g08050.1	elongation factor Tu, putative, expressed
AT1G07950.2	136	155	135	156	0.202078	Surfeit locus protein 5 subunit 22 of Mediator complex	MED22B	PF06179	PTHR12434	KOG3304	GO:0016592,GO:0006357,GO:0001104	LOC_Os08g37480.2	mediator of RNA polymerase II transcription subunit 22, putative, expressed
AT1G07960.1	193	185	191	186	-0.043842	PDI-like 5-1	PDIL5-1	PF00085	PTHR18929,PTHR18929:SF104		GO:0045454	LOC_Os03g17860.1	OsPDIL5-1 protein disulfide isomerase PDIL5-1, expressed
AT1G07970.1	233	197	231	198	-0.22561	cytochrome B561, amino-terminal protein		PF09786	PTHR21780,PTHR21780:SF0			LOC_Os03g17950.1	expressed protein
AT1G07980.1	150	155	149	155	0.0608808	nuclear factor Y, subunit C10	NF-YC10	PF00808	PTHR10252,PTHR10252:SF44	KOG1756		LOC_Os03g63530.1	histone-like transcription factor and archaeal histone, putative, expressed
AT1G07985.1	5	4	5	4	-0.308466	Expressed protein			PTHR34190,PTHR34190:SF4			LOC_Os03g42520.1	expressed protein
AT1G07990.1	540	490	537	491	-0.128233	SIT4 phosphatase-associated family protein		PF04499	PTHR12634,PTHR12634:SF8			LOC_Os04g52940.1	SIT4 phosphatase-associated protein domain containing protein, expressed
AT1G08000.1	172	140	171	141	-0.283493	GATA transcription factor 10	GATA10	PF00320	PTHR10071,PTHR10071:SF184	KOG1601	GO:0043565,GO:0008270,GO:0006355,GO:0003700	LOC_Os02g56250.1	GATA zinc finger domain containing protein, expressed
AT1G08005.1	8	4	7	4	-0.893181	serine/threonine-protein phosphatase 6 regulatory subunit
AT1G08010.1	403	288	401	289	-0.471182	GATA transcription factor 11	GATA11	PF00320	PTHR10071,PTHR10071:SF184	KOG1601	GO:0043565,GO:0008270,GO:0006355,GO:0003700	LOC_Os02g56250.1	GATA zinc finger domain containing protein, expressed
AT1G08030.1	62	64	61	64	0.0600381	tyrosylprotein sulfotransferase	TPST	PF03567	PTHR12812,PTHR12812:SF0		GO:0016021,GO:0008146	LOC_Os06g06370.1	expressed protein
AT1G08040.1	102	97	101	97	-0.0520532	trimethylguanosine synthase (DUF707)		PF05212	PTHR31210,PTHR31210:SF13			LOC_Os05g01760.1	lysine ketoglutarate reductase trans-splicing related 1, putative, expressed
AT1G08050.1	59	54	58	54	-0.115351	Zinc finger (C3HC4-type RING finger) family protein		PF17123,PF14624,PF00092	PTHR10579,PTHR10579:SF61			LOC_Os03g04890.1	zinc finger family protein, putative, expressed
AT1G08060.3	435	310	433	311	-0.477658	ATP-dependent helicase family protein	MOM		PTHR10799,PTHR10799:SF620			LOC_Os02g02050.1	SNF2 family N-terminal domain containing protein, expressed
AT1G08065.1	14	9	14	9	-0.623968	alpha carbonic anhydrase 5	ACA5	PF00194	PTHR18952,PTHR18952:SF100	KOG0382		LOC_Os08g36630.1	bifunctional monodehydroascorbate reductase and carbonic anhydrasenectarin-3 precursor, putative, expressed
AT1G08070.1	10	11	10	11	0.149413	Tetratricopeptide repeat (TPR)-like superfamily protein	OTP82	PF14432,PF01535,PF13041	PTHR24015,PTHR24015:SF527			LOC_Os04g14130.2	pentatricopeptide, putative, expressed
AT1G08080.1	8	6	7	6	-0.308713	alpha carbonic anhydrase 7	ACA7	PF00194	PTHR18952,PTHR18952:SF111	KOG0382		LOC_Os08g36630.1	bifunctional monodehydroascorbate reductase and carbonic anhydrasenectarin-3 precursor, putative, expressed
AT1G08110.4	683	807	679	810	0.255223	lactoylglutathione lyase family protein / glyoxalase I family protein		PF00903	PTHR10374,PTHR10374:SF8	KOG2944		LOC_Os05g22970.1	glyoxalase family protein, putative, expressed
AT1G08125.2	17	13	16	13	-0.388782	S-adenosyl-L-methionine-dependent methyltransferases superfamily protein		PF10294	PTHR14614,PTHR14614:SF30			LOC_Os02g57330.1	expressed protein
AT1G08130.1	433	345	431	346	-0.314242	DNA ligase 1	LIG1	PF04679,PF04675,PF01068	PTHR10459,PTHR10459:SF10		GO:0006310,GO:0006281,GO:0003910,GO:0003677,GO:0005524	LOC_Os10g34750.2	LIG1 - Putative DNA ligase I, expressed
AT1G08135.1	4	3	4	3	-0.401575	cation/H+ exchanger 6B	CHX6B	PF00999	PTHR32468,PTHR32468:SF17		GO:0055085,GO:0016021,GO:0015299,GO:0006812	LOC_Os05g40650.1	ATCHX, putative, expressed
AT1G08140.1	83	87	83	87	0.0814733	cation/H+ exchanger 6A	CHX6A	PF00999	PTHR32468,PTHR32468:SF17		GO:0055085,GO:0016021,GO:0015299,GO:0006812	LOC_Os05g40650.1	ATCHX, putative, expressed
AT1G08150.1	51	42	50	42	-0.269742	Cation/hydrogen exchanger family protein	ATCHX5	PF00999	PTHR32468,PTHR32468:SF17		GO:0055085,GO:0016021,GO:0015299,GO:0006812	LOC_Os05g40650.1	ATCHX, putative, expressed
AT1G08160.1	264	231	262	231	-0.179565	Late embryogenesis abundant (LEA) hydroxyproline-rich glycoprotein family		PF03168	PTHR31852,PTHR31852:SF5			LOC_Os02g44670.1	harpin-induced protein 1 domain containing protein, expressed
AT1G08165.1	6	4	5	4	-0.446306	hypothetical protein
AT1G08180.1	59	71	58	71	0.292636	cyclin-dependent kinase inhibitor			PTHR33142
AT1G08190.1	1730	1587	1720	1593	-0.110611	vacuolar protein sorting 41	VPS41	PF00637	PTHR12616		GO:0016192,GO:0006886	LOC_Os04g11880.1	WD domain, G-beta repeat domain containing protein, expressed
AT1G08200.1	3919	4030	3897	4045	0.0537602	UDP-D-apiose/UDP-D-xylose synthase 2	AXS2	PF01073	PTHR10366,PTHR10366:SF348	KOG1429	GO:0055114,GO:0016616,GO:0006694,GO:0003854	LOC_Os01g73790.1	NAD dependent epimerase/dehydratase family protein, putative, expressed
AT1G08210.3	135	164	134	164	0.29515	Eukaryotic aspartyl protease family protein		PF14541	PTHR13683,PTHR13683:SF348	KOG1339	GO:0006508,GO:0004190	LOC_Os01g56930.1	eukaryotic aspartyl protease domain containing protein, expressed
AT1G08220.1	40	40	39	40	0.0314689	ATPase complex subunit		PF05176	PTHR28106,PTHR28106:SF1	KOG4614		LOC_Os05g08410.1	ATP10 protein, expressed
AT1G08230.2	26	27	26	27	0.0674143	Transmembrane amino acid transporter family protein		PF01490	PTHR22950,PTHR22950:SF319	KOG1303		LOC_Os01g63854.1	transmembrane amino acid transporter protein, putative, expressed
AT1G08250.1	154	108	153	108	-0.493709	arogenate dehydratase 6	ADT6	PF00800	PTHR21022,PTHR21022:SF5		GO:0009094,GO:0004664	LOC_Os04g33390.1	prephenate dehydratase domain containing protein, expressed
AT1G08260.1	443	333	441	334	-0.398304	DNA polymerase epsilon catalytic subunit	TIL1	PF00136,PF03104,PF08490	PTHR10670		GO:0003677,GO:0000166,GO:0008408,GO:0008270,GO:0006260,GO:0005634,GO:0003887	LOC_Os02g30800.1	POLE1 - Putative DNA polymerase epsilon catalytic subunit, expressed
AT1G08270.2	64	95	64	95	0.58343	vacuolar protein sorting-associated protein		PF04212	PTHR23074,PTHR23074:SF93			LOC_Os01g04814.1	vacuolar protein sorting-associating protein 4B, putative, expressed
AT1G08280.1	83	88	83	88	0.0896015	Glycosyltransferase family 29 (sialyltransferase) family protein		PF00777	PTHR13713,PTHR13713:SF54	KOG2692	GO:0008373,GO:0006486	LOC_Os01g63970.1	sialyltransferase family domain containing protein, expressed
AT1G08290.1	24	21	24	21	-0.214087	WIP domain protein 3	WIP3		PTHR10593,PTHR10593:SF41			LOC_Os06g40960.1	ZOS6-05 - C2H2 zinc finger protein, expressed
AT1G08300.1	23	19	22	19	-0.268537	no vein-like protein	NVL	PF13020	PTHR32387			LOC_Os03g58910.2	expressed protein
AT1G08315.1	62	70	62	70	0.178002	ARM repeat superfamily protein		PF00514	PTHR23315,PTHR23315:SF57		GO:0005515	LOC_Os01g72600.1	spotted leaf 11, putative, expressed
AT1G08340.1	196	196	194	197	0.0170508	Rho GTPase activating protein with PAK-box/P21-Rho-binding domain-containing protein		PF00786,PF00620	PTHR23177,PTHR23177:SF20		GO:0007165	LOC_Os11g05540.1	rhoGAP domain containing protein, expressed
AT1G08350.2	66	54	66	54	-0.289424	Endomembrane protein 70 protein family		PF02990	PTHR10766,PTHR10766:SF60		GO:0016021	LOC_Os03g13380.1	transmembrane 9 superfamily member, putative, expressed
AT1G08360.1	2280	2538	2267	2548	0.168156	Ribosomal protein L1p/L10e family		PF00687	PTHR23105,PTHR23105:SF48	KOG1570		LOC_Os02g21660.1	L1P family of ribosomal proteins domain containing protein, expressed
AT1G08370.1	463	448	461	449	-0.0358291	decapping 1	DCP1	PF06058	PTHR16290,PTHR16290:SF3	KOG2868		LOC_Os11g05650.1	mRNA-decapping enzyme, putative, expressed
AT1G08380.1	9744	11517	9692	11562	0.254569	photosystem I subunit O	PSAO		PTHR36311,PTHR36311:SF1			LOC_Os04g33830.1	membrane protein, putative, expressed
AT1G08390.1	34	58	34	58	0.784308	recQ-mediated instability-like protein		PF16100	PTHR33962,PTHR33962:SF1			LOC_Os03g47990.1	OB-fold nucleic acid binding domain containing protein, putative, expressed
AT1G08400.1	98	99	97	99	0.0354316	RINT-1 / TIP-1 family		PF04437	PTHR13520,PTHR13520:SF0		GO:0048193,GO:0005783	LOC_Os07g48720.1	MAG2, putative, expressed
AT1G08410.1	145	132	144	133	-0.117065	P-loop containing nucleoside triphosphate hydrolases superfamily protein		PF01926	PTHR11089,PTHR11089:SF7		GO:0005525	LOC_Os12g42370.1	GTPase of unknown function domain containing protein, putative, expressed
AT1G08420.1	265	263	263	264	0.00535488	BRI1 suppressor 1 (BSU1)-like 2	BSL2	PF07646,PF13418,PF00149	PTHR11668,PTHR11668:SF243	KOG0374	GO:0005515,GO:0016787	LOC_Os12g42310.1	serine/threonine-protein phosphatase BSL2, putative, expressed
AT1G08430.1	9	10	9	10	0.0917643	aluminum-activated malate transporter 1	ALMT1	PF11744	PTHR31086,PTHR31086:SF22		GO:0015743	LOC_Os04g34010.1	aluminum-activated malate transporter, putative, expressed
AT1G08440.1	21	22	20	22	0.0825786	aluminum activated malate transporter family protein		PF11744	PTHR31086,PTHR31086:SF22		GO:0015743	LOC_Os04g34010.1	aluminum-activated malate transporter, putative, expressed
AT1G08450.1	180	189	179	190	0.0838025	calreticulin 3	CRT3	PF00262	PTHR11073,PTHR11073:SF6	KOG0674	GO:0051082,GO:0006457,GO:0005783,GO:0005509	LOC_Os05g43170.1	calreticulin precursor protein, putative, expressed
AT1G08460.1	192	165	190	165	-0.205783	histone deacetylase 8	HDA08	PF00850	PTHR10625,PTHR10625:SF121	KOG1344		LOC_Os05g36920.1	histone deacetylase, putative, expressed
AT1G08465.1	180	242	179	243	0.444493	Plant-specific transcription factor YABBY family protein	YAB2	PF04690	PTHR31675,PTHR31675:SF2		GO:0007275	LOC_Os03g44710.1	YABBY domain containing protein, putative, expressed
AT1G08470.1	461	410	459	412	-0.155675	strictosidine synthase-like 3	SSL3	PF08450	PTHR10426,PTHR10426:SF24	KOG1520		LOC_Os03g53950.1	strictosidine synthase, putative, expressed
AT1G08480.1	584	598	581	600	0.0464152	succinate dehydrogenase subunit	SDH6		PTHR36708,PTHR36708:SF1			LOC_Os08g02080.1	rickettsia 17 kDa surface antigen family protein, expressed
AT1G08490.1	348	335	346	336	-0.0415476	chloroplastic NIFS-like cysteine desulfurase	CPNIFS	PF00266	PTHR11601,PTHR11601:SF17	KOG1549		LOC_Os12g18900.1	aminotransferase, putative, expressed
AT1G08500.1	15	15	15	15	-0.0352511	early nodulin-like protein 18	ENODL18	PF02298	PTHR33021,PTHR33021:SF41		GO:0009055	LOC_Os01g17470.1	plastocyanin-like domain containing protein, putative, expressed
AT1G08510.1	2653	2684	2639	2695	0.0301808	fatty acyl-ACP thioesterases B	FATB	PF12590,PF01643	PTHR31727,PTHR31727:SF2		GO:0016790,GO:0006633	LOC_Os06g05130.1	myristoyl-acyl carrier protein thioesterase, chloroplast precursor, putative, expressed
AT1G08520.1	1696	1462	1687	1468	-0.2007	ALBINA 1	ALB1	PF01078,PF13519	PTHR10338,PTHR10338:SF126		GO:0016851,GO:0015995,GO:0015979	LOC_Os03g59640.1	magnesium-chelatase subunit chlD, chloroplast precursor, putative, expressed
AT1G08530.1	89	127	89	127	0.52052	chitinase-like protein			PTHR33825,PTHR33825:SF5			LOC_Os12g24240.1	expressed protein
AT1G08540.1	1004	884	998	887	-0.169452	RNApolymerase sigma subunit 2	SIG2	PF04542,PF04545,PF04539	PTHR30603		GO:0016987,GO:0006355,GO:0006352,GO:0003700,GO:0003677	LOC_Os11g26160.1	RNA polymerase sigma factor, putative, expressed
AT1G08550.1	233	293	232	294	0.343795	non-photochemical quenching 1	NPQ1	PF07137	PTHR33970,PTHR33970:SF1		GO:0055114,GO:0046422,GO:0009507	LOC_Os04g31040.1	violaxanthin de-epoxidase, putative, expressed
AT1G08560.1	277	331	275	332	0.270795	syntaxin of plants 111	SYP111	PF05739,PF00804	PTHR19957,PTHR19957:SF91	KOG0810	GO:0005515,GO:0016020	LOC_Os03g52650.1	syntaxin-related protein, putative, expressed
AT1G08570.1	458	296	455	297	-0.614779	atypical CYS HIS rich thioredoxin 4	ACHT4	PF00085	PTHR10438,PTHR10438:SF245	KOG0907	GO:0045454,GO:0015035,GO:0006662	LOC_Os03g21000.1	thioredoxin, putative, expressed
AT1G08580.1	262	286	261	287	0.137325	hypothetical protein			PTHR36709			LOC_Os02g39180.1	expressed protein
AT1G08590.1	142	121	141	121	-0.223325	Leucine-rich receptor-like protein kinase family protein		PF08263,PF13855,PF00069	PTHR27000,PTHR27000:SF99	KOG1187	GO:0005515,GO:0006468,GO:0005524,GO:0004672	LOC_Os02g02140.1	receptor protein kinase CLAVATA1 precursor, putative, expressed
AT1G08600.2	32	19	32	19	-0.777777	P-loop containing nucleoside triphosphate hydrolases superfamily protein	ATRX	PF04851,PF00271	PTHR10799,PTHR10799:SF350		GO:0016787,GO:0005524,GO:0003677	LOC_Os10g31970.1	SNF2 family N-terminal domain containing protein, expressed
AT1G08610.1	49	73	48	73	0.593226	Pentatricopeptide repeat (PPR) superfamily protein		PF13041	PTHR24015,PTHR24015:SF533			LOC_Os10g33700.2	PPR repeat containing protein, expressed
AT1G08620.3	129	156	128	156	0.282907	Transcription factor jumonji (jmj) family protein / zinc finger (C5HC2 type) family protein	PKDM7D	PF05964,PF02928,PF02375,PF05965,PF02373	PTHR10694,PTHR10694:SF53		GO:0005634	LOC_Os05g10770.1	transcription factor jumonji, putative, expressed
AT1G08640.1	570	574	566	576	0.0247938	Chloroplast J-like domain 1	CJD1	PF11833	PTHR33372,PTHR33372:SF1			LOC_Os08g03380.1	heat shock protein DnaJ, putative, expressed
AT1G08645.1	84	112	84	112	0.421945	hypothetical protein
AT1G08650.1	213	304	212	305	0.524332	phosphoenolpyruvate carboxylase kinase 1	PPCK1	PF07714	PTHR24349,PTHR24349:SF76	KOG0032	GO:0006468,GO:0004672	LOC_Os02g41580.1	CAMK_CAMK_like.14 - CAMK includes calcium/calmodulin depedent protein kinases, expressed
AT1G08660.1	210	243	209	244	0.224263	MALE GAMETOPHYTE DEFECTIVE 2	MGP2	PF00777	PTHR13713,PTHR13713:SF31	KOG2692	GO:0008373,GO:0006486	LOC_Os11g36420.1	sialyltransferase family domain containing protein, expressed
AT1G08680.4	108	105	107	105	-0.0273705	ARF GAP-like zinc finger-containing protein ZIGA4	ZIGA4	PF01412	PTHR23180,PTHR23180:SF202	KOG0702	GO:0005096	LOC_Os01g59850.1	GTPase-activating protein, putative, expressed
AT1G08700.1	492	425	489	427	-0.196264	Presenilin-1	PS1	PF01080	PTHR10202,PTHR10202:SF15	KOG2736	GO:0016021,GO:0004190	LOC_Os01g16930.1	presenilin, putative, expressed
AT1G08710.2	91	70	91	70	-0.375391	F-box family protein			PTHR15537,PTHR15537:SF5			LOC_Os01g59910.1	OsFBX29 - F-box domain containing protein, expressed
AT1G08720.1	204	229	203	230	0.180211	Protein kinase superfamily protein	EDR1	PF07714,PF14381	PTHR23257,PTHR23257:SF440	KOG0192	GO:0006468,GO:0004672	LOC_Os03g06410.1	protein kinase domain containing protein, expressed
AT1G08730.1	13	17	12	17	0.413335	Myosin family protein with Dil domain-containing protein	XIC	PF02736,PF00612,PF01843,PF00063	PTHR13140,PTHR13140:SF390		GO:0016459,GO:0005524,GO:0003774,GO:0005515	LOC_Os06g29350.1	myosin, putative, expressed
AT1G08750.1	17	20	16	20	0.29048	Peptidase C13 family		PF01650	PTHR12000,PTHR12000:SF1		GO:0008233,GO:0006508,GO:0042765,GO:0016255,GO:0003923	LOC_Os02g12740.1	GPI-anchor transamidase precursor, putative, expressed
AT1G08760.1	412	366	410	367	-0.157424	GPI-anchored adhesin-like protein, putative (DUF936)		PF06075	PTHR31928,PTHR31928:SF4			LOC_Os08g42870.1	expressed protein
AT1G08770.1	185	196	184	197	0.100714	prenylated RAB acceptor 1.E	PRA1.E	PF03208	PTHR19317,PTHR19317:SF3	KOG3142		LOC_Os03g58410.1	prenylated rab acceptor, putative, expressed
AT1G08780.1	128	161	127	161	0.345522	ABI3-interacting protein 3	AIP3	PF01920	PTHR21100,PTHR21100:SF9	KOG1760	GO:0051082,GO:0016272,GO:0006457	LOC_Os03g43020.1	prefoldin subunit, putative, expressed
AT1G08800.1	224	262	223	263	0.239591	myosin-binding protein (Protein of unknown function, DUF593)		PF04576	PTHR31448,PTHR31448:SF10			LOC_Os01g56790.1	expressed protein
AT1G08810.1	184	205	183	205	0.169903	myb domain protein 60	MYB60	PF00249	PTHR10641,PTHR10641:SF641	KOG0048		LOC_Os12g03150.1	myb-like DNA-binding domain containing protein, putative, expressed
AT1G08820.1	603	672	600	675	0.169758	vamp/synaptobrevin-associated protein 27-2	VAP27-2	PF00635	PTHR10809,PTHR10809:SF59	KOG0439	GO:0005789	LOC_Os05g30950.1	MSP domain containing protein, putative, expressed
AT1G08830.1	446	746	443	748	0.756198	copper/zinc superoxide dismutase 1	CSD1	PF00080	PTHR10003	KOG0441	GO:0055114,GO:0046872,GO:0006801	LOC_Os07g46990.2	copper/zinc superoxide dismutase, putative, expressed
AT1G08840.3	6	2	6	2	-1.5715	DNA replication helicase	emb2411	PF01930,PF13086	PTHR10887,PTHR10887:SF14		GO:0043142,GO:0033567,GO:0017108	LOC_Os04g49860.1	DNA2 - Putative DNA replication helicase 2 protein, expressed
AT1G08845.2	44	29	44	29	-0.613463	Ribosomal L18p/L5e family protein		PF00861	PTHR12899,PTHR12899:SF5		GO:0006412,GO:0005840,GO:0005622,GO:0003735	LOC_Os10g41050.1	ribosomal L18p/L5e family protein, expressed
AT1G08860.1	57	127	57	127	1.16906	Calcium-dependent phospholipid-binding Copine family protein	BON3	PF00168,PF07002	PTHR10857,PTHR10857:SF26		GO:0005515	LOC_Os05g30970.1	copine, putative, expressed
AT1G08880.1	569	617	565	619	0.130411	Histone superfamily protein	H2AXA	PF00125,PF16211	PTHR23430	KOG1756	GO:0003677	LOC_Os12g34510.1	Core histone H2A/H2B/H3/H4 domain containing protein, putative, expressed
AT1G08890.1	9	11	9	11	0.302969	Major facilitator superfamily protein		PF07690	PTHR23500,PTHR23500:SF62	KOG0254	GO:0055085,GO:0016021	LOC_Os11g42430.1	transporter family protein, putative, expressed
AT1G08900.1	30	19	30	19	-0.646452	Major facilitator superfamily protein		PF07690	PTHR23500,PTHR23500:SF62	KOG0254	GO:0055085,GO:0016021	LOC_Os11g42430.1	transporter family protein, putative, expressed
AT1G08910.1	310	274	308	275	-0.16718	zinc ion binding protein		PF02891	PTHR10782,PTHR10782:SF4	KOG2169	GO:0008270,GO:0019789	LOC_Os06g06870.1	zinc finger protein, putative, expressed
AT1G08920.2	95	120	94	120	0.350851	ERD (early response to dehydration) six-like 1	ESL1	PF07690	PTHR23500,PTHR23500:SF62	KOG0254	GO:0055085,GO:0016021	LOC_Os11g42430.1	transporter family protein, putative, expressed
AT1G08930.1	11	90	10	90	3.1127	Major facilitator superfamily protein	ERD6	PF07690	PTHR23500,PTHR23500:SF62	KOG0254	GO:0055085,GO:0016021	LOC_Os11g42430.1	transporter family protein, putative, expressed
AT1G08940.1	57	61	56	61	0.123801	Phosphoglycerate mutase family protein		PF00300	PTHR23029,PTHR23029:SF18	KOG0235		LOC_Os05g04960.1	phosphoglycerate mutase, putative, expressed
AT1G08960.1	196	193	194	194	-0.00523284	cation exchanger 11	CAX11	PF01699	PTHR12266	KOG2399	GO:0055085,GO:0016021	LOC_Os03g08230.1	sodium/calcium exchanger protein, putative, expressed
AT1G08970.1	747	693	743	696	-0.0948828	nuclear factor Y, subunit C9	NF-YC9	PF00808	PTHR10252,PTHR10252:SF48	KOG1657		LOC_Os02g07450.2	core histone H2A/H2B/H3/H4, putative, expressed
AT1G08980.1	262	365	260	366	0.492554	amidase 1	AMI1	PF01425	PTHR11895,PTHR11895:SF39	KOG1211	GO:0016884	LOC_Os04g02780.1	amidase family protein, putative, expressed
AT1G08985.1	14	14	14	14	-0.0387944	AP2/B3-like transcriptional factor family protein		PF02362	PTHR34269		GO:0003677
AT1G09000.1	68	67	68	67	-0.0077174	NPK1-related protein kinase 1	NP1	PF00069	PTHR24361,PTHR24361:SF315	KOG0198	GO:0006468,GO:0005524,GO:0004672	LOC_Os09g21510.1	STE_MEKK_ste11_MAP3K.2 - STE kinases include homologs to sterile 7, sterile 11 and sterile 20 from yeast, expressed
AT1G09010.1	591	617	587	619	0.0756343	glycoside hydrolase family 2 protein		PF02836,PF02837,PF00703	PTHR10066,PTHR10066:SF56		GO:0005975,GO:0004553,GO:0033947	LOC_Os05g32530.1	mannosylglycoprotein endo-beta-mannosidase, putative, expressed
AT1G09020.1	800	676	795	679	-0.228646	sucrose nonfermenting-like protein	SNF4	PF00571,PF16561	PTHR13780,PTHR13780:SF54	KOG1764		LOC_Os03g63940.1	CBS domain containing membrane protein, putative, expressed
AT1G09040.1	71	61	71	61	-0.217364	arginine-glutamic acid dipeptide repeat protein			PTHR13859,PTHR13859:SF15			LOC_Os07g38080.2	homeodomain-like, putative, expressed
AT1G09050.1	83	63	82	63	-0.38719	arginine-glutamic acid dipeptide repeat protein			PTHR13859,PTHR13859:SF15			LOC_Os07g38080.2	homeodomain-like, putative, expressed
AT1G09060.3	95	71	94	71	-0.406685	JmjC domain protein JMJ24		PF10497,PF02373,PF08879	PTHR12549,PTHR12549:SF17	KOG1356		LOC_Os03g22540.1	jmjC domain containing protein, expressed
AT1G09070.1	3001	3173	2984	3186	0.0940984	soybean gene regulated by cold-2	SRC2	PF00168	PTHR32246,PTHR32246:SF18		GO:0005515	LOC_Os01g70790.1	SRC2 protein, putative, expressed
AT1G09090.2	5	4	4	4	-0.349509	respiratory burst oxidase-like protein	RBOHB	PF01794,PF08414,PF08022,PF08030	PTHR11972,PTHR11972:SF57		GO:0055114,GO:0050664,GO:0004601,GO:0016491,GO:0016174	LOC_Os11g33120.1	respiratory burst oxidase, putative, expressed
AT1G09100.1	369	335	367	336	-0.125997	26S proteasome AAA-ATPase subunit RPT5B	RPT5B	PF07728	PTHR23073,PTHR23073:SF7		GO:0016887,GO:0005524	LOC_Os06g07630.1	26S protease regulatory subunit 6A, putative, expressed
AT1G09130.3	598	546	595	548	-0.119053	ATP-dependent caseinolytic (Clp) protease/crotonase family protein		PF00574	PTHR10381,PTHR10381:SF6	KOG0840		LOC_Os03g22430.1	OsClp5 - Putative Clp protease homologue, expressed
AT1G09140.1	877	997	872	1000	0.19776	SERINE-ARGININE PROTEIN 30	SR30	PF00076	PTHR24012,PTHR24012:SF442	KOG0105	GO:0003676	LOC_Os07g47630.1	RNA recognition motif containing protein, expressed
AT1G09150.1	417	452	414	453	0.129852	pseudouridine synthase and archaeosine transglycosylase (PUA) domain-containing protein		PF01472	PTHR22798	KOG2523	GO:0003723	LOC_Os01g21180.1	translation machinery-associated protein 20, putative, expressed
AT1G09155.1	11	7	10	7	-0.571677	phloem protein 2-B15	PP2-B15	PF14299	PTHR32278,PTHR32278:SF2			LOC_Os12g03740.1	OsFBX438 - F-box domain containing protein, expressed
AT1G09160.1	136	263	135	264	0.967305	Protein phosphatase 2C family protein		PF00481	PTHR13832,PTHR13832:SF158	KOG0698	GO:0003824,GO:0006470,GO:0004722	LOC_Os07g49040.1	protein phosphotase protein, putative, expressed
AT1G09180.1	23	18	22	18	-0.348538	secretion-associated RAS super family 1	SARA1A	PF08477	PTHR11711,PTHR11711:SF171	KOG0077	GO:0007264,GO:0005525	LOC_Os01g15010.1	miro, putative, expressed
AT1G09190.1	33	36	33	36	0.118367	Tetratricopeptide repeat (TPR)-like superfamily protein		PF13041,PF01535	PTHR24015,PTHR24015:SF748			LOC_Os05g36350.1	pentatricopeptide, putative, expressed
AT1G09195.10	33	20	33	20	-0.70946	Ppx-GppA phosphatase		PF01966,PF02541	PTHR30005,PTHR30005:SF3
AT1G09200.1	1016	1359	1010	1364	0.433787	Histone superfamily protein		PF00125	PTHR11426	KOG1745	GO:0003677,GO:0000786	LOC_Os04g34240.1	histone H3, putative, expressed
AT1G09210.1	3472	4032	3453	4048	0.229365	calreticulin 1b	CRT1b	PF00262	PTHR11073		GO:0051082,GO:0006457,GO:0005783,GO:0005509	LOC_Os03g61670.1	calreticulin precursor, putative, expressed
AT1G09220.1	7	8	6	8	0.312596	Pentatricopeptide repeat (PPR) superfamily protein		PF13041,PF01535	PTHR24015,PTHR24015:SF645			LOC_Os01g60000.1	pentatricopeptide, putative, expressed
AT1G09230.1	24	36	23	36	0.62872	RNA-binding (RRM/RBD/RNP motifs) family protein		PF00076	PTHR16105,PTHR16105:SF0	KOG4206	GO:0003676	LOC_Os03g21020.1	RNA recognition motif containing protein, putative, expressed
AT1G09250.1	260	206	258	207	-0.319649	basic helix-loop-helix (bHLH) DNA-binding superfamily protein			PTHR33124,PTHR33124:SF7			LOC_Os03g19780.1	expressed protein
AT1G09280.1	151	158	150	159	0.0788629	rhodanese-like domain protein		PF12368,PF03959	PTHR22778,PTHR22778:SF0	KOG2551		LOC_Os12g37630.1	domain of unknown function family protein, expressed
AT1G09290.1	82	90	81	90	0.156592	hypothetical protein			PTHR13452,PTHR13452:SF9	KOG3943		LOC_Os02g45090.1	expressed protein
AT1G09300.1	97	94	96	94	-0.0317247	Metallopeptidase M24 family protein		PF05195,PF00557	PTHR10804,PTHR10804:SF17		GO:0030145,GO:0004177	LOC_Os12g37640.1	xaa-Pro aminopeptidase, putative, expressed
AT1G09310.1	8252	9086	8207	9122	0.152441	plant/protein (Protein of unknown function, DUF538)		PF04398	PTHR31676,PTHR31676:SF10			LOC_Os12g37650.1	DUF538 domain containing protein, putative, expressed
AT1G09320.1	90	70	90	70	-0.359408	agenet domain-containing protein		PF05641	PTHR31917,PTHR31917:SF16			LOC_Os05g04180.1	agenet domain containing protein, putative, expressed
AT1G09330.1	95	131	94	131	0.478744	golgi apparatus membrane protein-like protein ECHIDNA protein		PF05832	PTHR13019,PTHR13019:SF14	KOG3195	GO:0016021	LOC_Os01g22870.1	expressed protein
AT1G09340.2	2797	2872	2781	2883	0.0518265	chloroplast RNA binding protein	CRB	PF01370	PTHR10366,PTHR10366:SF289	KOG1429,KOG0747	GO:0050662,GO:0003824	LOC_Os12g23180.1	3-beta hydroxysteroid dehydrogenase/isomerase family protein, putative, expressed
AT1G09350.1	6	3	6	3	-0.986538	galactinol synthase 3	GolS3	PF01501	PTHR11183,PTHR11183:SF59	KOG1950	GO:0016757	LOC_Os07g48830.1	glycosyl transferase 8 domain containing protein, putative, expressed
AT1G09370.1	361	379	359	380	0.0855815	Plant invertase/pectin methylesterase inhibitor superfamily protein		PF04043	PTHR36710,PTHR36710:SF1		GO:0004857
AT1G09380.1	38	30	37	30	-0.308705	nodulin MtN21 /EamA-like transporter family protein	UMAMIT25	PF00892	PTHR31218,PTHR31218:SF11		GO:0016021,GO:0016020,GO:0022857	LOC_Os01g19290.1	integral membrane protein DUF6 containing protein, expressed
AT1G09390.1	204	295	203	296	0.543132	GDSL-like Lipase/Acylhydrolase superfamily protein		PF00657	PTHR22835,PTHR22835:SF275		GO:0016788	LOC_Os01g22780.2	GDSL-like lipase/acylhydrolase, putative, expressed
AT1G09400.1	11	13	10	13	0.32097	FMN-linked oxidoreductases superfamily protein		PF00724	PTHR22893,PTHR22893:SF44	KOG0134	GO:0055114,GO:0016491,GO:0010181	LOC_Os06g11210.1	12-oxophytodienoate reductase, putative, expressed
AT1G09410.1	13	17	13	17	0.400485	pentatricopeptide (PPR) repeat-containing protein		PF14432,PF12854,PF13041,PF01535	PTHR24015,PTHR24015:SF553			LOC_Os03g20190.1	pentatricopeptide, putative, expressed
AT1G09415.1	46	56	46	56	0.284265	NIM1-interacting 3	NIMIN-3	PF15699
AT1G09420.2	74	68	74	68	-0.108394	glucose-6-phosphate dehydrogenase 4	G6PD4	PF00479,PF02781	PTHR23429,PTHR23429:SF4		GO:0055114,GO:0050661,GO:0006006,GO:0004345	LOC_Os03g20300.2	glucose-6-phosphate 1-dehydrogenase, chloroplast precursor, putative, expressed
AT1G09430.1	476	500	473	502	0.0843384	ATP-citrate lyase A-3	ACLA-3	PF08442,PF16114	PTHR23118			LOC_Os11g47330.1	ATP-grasp domain containing protein, expressed
AT1G09440.1	222	195	220	196	-0.170604	Protein kinase superfamily protein		PF00069	PTHR27001,PTHR27001:SF69	KOG1187	GO:0006468,GO:0005524,GO:0004672	LOC_Os01g21960.1	serine/threonine-protein kinase, putative, expressed
AT1G09450.1	43	44	42	44	0.0634173	Protein kinase superfamily protein	Haspin	PF12330	PTHR24419,PTHR24419:SF18	KOG2464		LOC_Os07g44360.1	serine/threonine-protein kinase Haspin, putative, expressed
AT1G09460.1	98	183	97	183	0.910202	Carbohydrate-binding X8 domain superfamily protein		PF07983	PTHR32227,PTHR32227:SF118			LOC_Os03g61780.1	glucan endo-1,3-beta-glucosidase-related, putative, expressed
AT1G09470.1	91	126	90	126	0.49104	myosin heavy chain, cardiac protein						LOC_Os05g04530.1	IF, putative, expressed
AT1G09490.1	72	67	72	67	-0.101223	NAD(P)-binding Rossmann-fold superfamily protein		PF01370	PTHR10366,PTHR10366:SF362	KOG1502	GO:0050662,GO:0003824	LOC_Os01g34480.1	NAD dependent epimerase/dehydratase family protein, putative, expressed
AT1G09510.1	107	92	106	92	-0.212378	NAD(P)-binding Rossmann-fold superfamily protein		PF01370	PTHR10366,PTHR10366:SF362	KOG1502	GO:0050662,GO:0003824	LOC_Os01g34480.1	NAD dependent epimerase/dehydratase family protein, putative, expressed
AT1G09520.1	108	94	107	94	-0.186871	hypothetical protein			PTHR34451,PTHR34451:SF2			LOC_Os05g19620.1	expressed protein
AT1G09530.1	9	5	9	5	-0.834946	phytochrome interacting factor 3	PIF3	PF00010	PTHR12565,PTHR12565:SF178		GO:0046983	LOC_Os03g56950.1	phytochrome-interacting factor 4, putative, expressed
AT1G09540.1	287	193	285	193	-0.56266	myb domain protein 61	MYB61	PF00249	PTHR10641,PTHR10641:SF465	KOG0048		LOC_Os01g18240.1	MYB family transcription factor, putative, expressed
AT1G09550.1	109	91	108	91	-0.254976	Pectinacetylesterase family protein		PF03283	PTHR21562,PTHR21562:SF5		GO:0016787	LOC_Os07g44070.1	pectinacetylesterase domain containing protein, expressed
AT1G09560.1	573	705	569	708	0.313676	germin-like protein 5	GLP5	PF07883	PTHR31238,PTHR31238:SF39			LOC_Os05g19670.1	Cupin domain containing protein, expressed
AT1G09570.3	141	202	140	202	0.528382	phytochrome A	PHYA	PF02518,PF01590,PF08446,PF00989,PF00360	PTHR24423,PTHR24423:SF519		GO:0005515,GO:0006355,GO:0018298,GO:0009584	LOC_Os03g51030.2	phytochrome A, putative, expressed
AT1G09575.1	87	96	87	96	0.147875	calcium uniporter-like protein (DUF607)		PF04678	PTHR13462,PTHR13462:SF19	KOG2966		LOC_Os12g02880.1	E2F-related protein, putative, expressed
AT1G09580.1	146	162	145	162	0.158819	emp24/gp25L/p24 family/GOLD family protein		PF01105	PTHR22811,PTHR22811:SF68	KOG1691	GO:0016021,GO:0006810	LOC_Os06g10760.1	emp24/gp25L/p24 family protein, putative, expressed
AT1G09590.1	1993	2434	1982	2443	0.301537	Translation protein SH3-like family protein		PF01157	PTHR20981	KOG1732	GO:0006412,GO:0005840,GO:0005622,GO:0003735	LOC_Os03g04750.1	60S ribosomal protein L21-2, putative, expressed
AT1G09600.1	67	42	67	42	-0.677656	Protein kinase superfamily protein		PF00069	PTHR24056,PTHR24056:SF203		GO:0006468,GO:0005524,GO:0004672	LOC_Os08g02050.1	protein kinase family protein, putative, expressed
AT1G09610.1	98	104	97	104	0.0922841	glucuronoxylan 4-O-methyltransferase-like protein (DUF579)	GXM3	PF04669	PTHR31444,PTHR31444:SF4			LOC_Os12g10320.1	plant-specific domain TIGR01627 family protein, expressed
AT1G09620.1	1778	1458	1768	1464	-0.272417	ATP binding/leucine-tRNA ligases/aminoacyl-tRNA ligase		PF08264,PF00133	PTHR11946,PTHR11946:SF51		GO:0006418,GO:0000166,GO:0005524,GO:0004812	LOC_Os09g32650.1	leucyl-tRNA synthetase, cytoplasmic, putative, expressed
AT1G09630.1	203	275	201	276	0.452329	RAB GTPase 11C	RAB11c	PF00025	PTHR24073,PTHR24073:SF484	KOG0087	GO:0005525	LOC_Os05g01480.1	ras-related protein, putative, expressed
AT1G09640.1	2362	2600	2349	2610	0.15194	Translation elongation factor EF1B, gamma chain		PF00043,PF02798,PF00647	PTHR11260,PTHR11260:SF194	KOG1627	GO:0005515,GO:0006414,GO:0003746	LOC_Os02g12800.2	elongation factor 1-gamma, putative, expressed
AT1G09645.1	165	196	164	196	0.25815	transmembrane protein			PTHR33780			LOC_Os05g34680.2	expressed protein
AT1G09650.1	17	17	17	17	-0.029652	F-box and associated interaction domains-containing protein		PF00646,PF07734	PTHR31945,PTHR31945:SF5		GO:0005515	LOC_Os07g16800.1	OsFBX233 - F-box domain containing protein, expressed
AT1G09660.1	176	175	175	176	0.00533567	RNA-binding KH domain-containing protein		PF16544	PTHR11208,PTHR11208:SF48	KOG1588		LOC_Os01g66300.1	KH domain containing protein, putative, expressed
AT1G09680.1	18	18	18	18	-0.0273422	Pentatricopeptide repeat (PPR) superfamily protein		PF13041	PTHR24015,PTHR24015:SF772			LOC_Os04g38930.1	pentatricopeptide, putative, expressed
AT1G09690.1	2733	3333	2718	3346	0.299841	Translation protein SH3-like family protein		PF01157	PTHR20981	KOG1732	GO:0006412,GO:0005840,GO:0005622,GO:0003735	LOC_Os03g04750.1	60S ribosomal protein L21-2, putative, expressed
AT1G09700.1	291	369	289	371	0.358293	dsRNA-binding domain-like superfamily protein	HYL1	PF00035	PTHR11207			LOC_Os11g01869.1	double-stranded RNA binding motif containing protein, expressed
AT1G09710.2	79	62	79	62	-0.336075	Homeodomain-like superfamily protein		PF00249	PTHR21717,PTHR21717:SF20			LOC_Os02g34630.1	MYB family transcription factor, putative, expressed
AT1G09730.1	350	331	348	332	-0.0670614	Cysteine proteinases superfamily protein		PF02902	PTHR24365	KOG0779	GO:0008234,GO:0006508	LOC_Os05g11770.1	ulp1 protease family protein, putative, expressed
AT1G09740.1	10	2	9	2	-2.23505	Adenine nucleotide alpha hydrolases-like superfamily protein		PF00582	PTHR31964,PTHR31964:SF2		GO:0006950	LOC_Os02g52314.1	BTB1 - Bric-a-Brac,Tramtrack, Broad Complex BTB domain, expressed
AT1G09750.1	1313	1907	1305	1914	0.552032	Eukaryotic aspartyl protease family protein		PF00026	PTHR13683,PTHR13683:SF259	KOG1339	GO:0006508,GO:0004190	LOC_Os03g08790.1	aspartic proteinase nepenthesin precursor, putative, expressed
AT1G09760.1	360	349	358	350	-0.0292723	U2 small nuclear ribonucleoprotein A	U2A'	PF14580	PTHR10552	KOG1644		LOC_Os02g13990.1	U2 small nuclear ribonucleoprotein A, putative, expressed
AT1G09770.1	1392	1595	1385	1601	0.209802	cell division cycle 5	CDC5	PF13921,PF11831	PTHR10641,PTHR10641:SF559			LOC_Os04g28090.1	MYB family transcription factor, putative, expressed
AT1G09780.1	1717	1602	1708	1608	-0.086517	Phosphoglycerate mutase, 2,3-bisphosphoglycerate-independent	iPGAM1	PF06415,PF01676	PTHR31637,PTHR31637:SF3		GO:0030145,GO:0006007,GO:0005737,GO:0004619,GO:0046872,GO:0003824	LOC_Os05g40420.1	2,3-bisphosphoglycerate-independent phosphoglycerate mutase, putative, expressed
AT1G09790.1	533	538	530	540	0.0269708	COBRA-like protein 6 precursor	COBL6	PF04833	PTHR31673,PTHR31673:SF5		GO:0031225,GO:0016049,GO:0010215	LOC_Os05g32110.1	COBRA, putative, expressed
AT1G09794.1	34	46	33	46	0.471114	Cox19 family protein (CHCH motif)		PF08991	PTHR15590,PTHR15590:SF0			LOC_Os12g08210.1	expressed protein
AT1G09795.1	696	753	692	756	0.128048	ATP phosphoribosyl transferase 2	ATP-PRT2	PF08029,PF01634	PTHR21403,PTHR21403:SF0	KOG2831	GO:0005737,GO:0003879,GO:0000287,GO:0000105	LOC_Os03g04169.1	ATP phosphoribosyltransferase, putative, expressed
AT1G09800.1	37	27	37	27	-0.467849	Pseudouridine synthase family protein		PF01416	PTHR11142,PTHR11142:SF1	KOG4393	GO:0009982,GO:0009451,GO:0003723,GO:0001522	LOC_Os12g09290.1	tRNA pseudouridine synthase family protein, putative, expressed
AT1G09810.1	41	53	41	53	0.384384	evolutionarily conserved C-terminal region 11	ECT11	PF04146	PTHR12357,PTHR12357:SF25			LOC_Os01g48790.1	YT521-B-like family domain containing protein, expressed
AT1G09812.1	7	19	7	19	1.41571	multidrug resistance protein			PTHR33728,PTHR33728:SF3			LOC_Os01g65630.1	expressed protein
AT1G09815.1	135	152	134	152	0.179774	polymerase delta 4	POLD4	PF04081	PTHR14303,PTHR14303:SF0		GO:0006260,GO:0005634	LOC_Os09g34850.3	POLD4A - Putative DNA polymerase delta complex subunit, expressed
AT1G09820.1	87	44	86	44	-0.961756	Pentatricopeptide repeat (PPR-like) superfamily protein		PF13041	PTHR24015,PTHR24015:SF745			LOC_Os10g34310.2	PPR repeat containing protein, expressed
AT1G09830.1	284	243	282	243	-0.214383	Glycinamide ribonucleotide (GAR) synthetase	PUR2	PF13535,PF02844,PF02843	PTHR10520,PTHR10520:SF36		GO:0009113,GO:0004637	LOC_Os08g09210.1	phosphoribosylamine--glycine ligase, putative, expressed
AT1G09850.1	145	102	144	102	-0.489055	xylem bark cysteine peptidase 3	XBCP3	PF00396,PF08246,PF00112	PTHR12411,PTHR12411:SF387	KOG1543	GO:0008234,GO:0006508	LOC_Os05g43230.1	oryzain alpha chain precursor, putative, expressed
AT1G09870.1	421	461	419	463	0.144423	histidine acid phosphatase family protein		PF00328	PTHR20963,PTHR20963:SF8		GO:0003993	LOC_Os03g60370.1	histidine acid phosphatase, putative, expressed
AT1G09880.3	45	29	45	29	-0.620771	Rhamnogalacturonate lyase family protein		PF14686,PF14683,PF06045	PTHR32018			LOC_Os08g44020.1	rhamnogalacturonate lyase, putative, expressed
AT1G09890.3	12	11	12	11	-0.112069	Rhamnogalacturonate lyase family protein		PF14686,PF14683,PF06045	PTHR32018,PTHR32018:SF1			LOC_Os08g44020.3	rhamnogalacturonate lyase, putative, expressed
AT1G09900.1	183	156	182	156	-0.217511	Pentatricopeptide repeat (PPR-like) superfamily protein		PF12854,PF13041	PTHR24015,PTHR24015:SF358			LOC_Os02g35750.1	pentatricopeptide repeat domain containing protein, putative, expressed
AT1G09910.1	25	11	24	11	-1.14153	Rhamnogalacturonate lyase family protein		PF14686,PF14683,PF06045	PTHR32018,PTHR32018:SF8			LOC_Os08g44020.1	rhamnogalacturonate lyase, putative, expressed
AT1G09920.1	237	235	236	235	-0.0019115	TRAF-type zinc finger-like protein			PTHR16295			LOC_Os03g24184.1	TRAF-type zinc finger domain-containing protein 1, putative, expressed
AT1G09930.1	23	19	23	19	-0.262633	oligopeptide transporter 2	OPT2	PF03169	PTHR22601,PTHR22601:SF23		GO:0055085	LOC_Os01g43940.1	oligopeptide transporter, putative, expressed
AT1G09932.1	7	16	7	16	1.16012	Phosphoglycerate mutase family protein		PF00300	PTHR23029,PTHR23029:SF47	KOG4754		LOC_Os04g01230.1	phosphoglycerate mutase, putative, expressed
AT1G09940.1	173	178	172	179	0.0544502	Glutamyl-tRNA reductase family protein	HEMA2	PF03807,PF00745,PF05201	PTHR13812,PTHR13812:SF20		GO:0055114,GO:0050661,GO:0033014,GO:0008883	LOC_Os10g35840.1	shikimate/quinate 5-dehydrogenase, putative, expressed
AT1G09950.1	5	8	4	8	0.843837	RESPONSE TO ABA AND SALT 1	RAS1	PF14144	PTHR22952,PTHR22952:SF113		GO:0043565,GO:0006351	LOC_Os01g20030.1	expressed protein
AT1G09960.1	173	121	172	121	-0.504204	sucrose transporter 4	SUT4	PF13347	PTHR19432,PTHR19432:SF38			LOC_Os12g44380.1	sucrose transporter, putativ, expressed
AT1G09970.2	297	610	295	612	1.05419	Leucine-rich receptor-like protein kinase family protein	LRR XI-23	PF08263,PF13855,PF00069	PTHR27000,PTHR27000:SF182	KOG1187	GO:0005515,GO:0006468,GO:0005524,GO:0004672	LOC_Os12g43640.1	receptor-like protein kinase HAIKU2 precursor, putative, expressed
AT1G09980.1	190	150	188	150	-0.329039	Putative serine esterase family protein		PF12394,PF05057	PTHR12482,PTHR12482:SF5			LOC_Os12g06800.1	serine esterase family protein, putative, expressed
AT1G09995.1	17	29	16	29	0.802595	DNA repair DEAD helicase RAD3/XP-D subfamily protein						LOC_Os05g13300.1	helicase, putative, expressed
AT1G10000.1	17	23	17	23	0.449561	Ribonuclease H-like superfamily protein		PF13966,PF13456	PTHR33033,PTHR33033:SF14			LOC_Os12g05160.1	transposon protein, putative, Mutator sub-class, expressed
AT1G10010.2	49	56	49	56	0.206133	amino acid permease 8	AAP8	PF01490	PTHR22950,PTHR22950:SF278	KOG1303		LOC_Os07g04180.1	amino acid transporter, putative, expressed
AT1G10020.1	379	704	377	706	0.905863	formin-like protein (DUF1005)		PF06219	PTHR31317,PTHR31317:SF3			LOC_Os07g04150.1	stress-induced protein, putative, expressed
AT1G10030.1	120	127	119	127	0.101299	ergosterol biosynthesis protein	ERG28	PF03694	PTHR15451,PTHR15451:SF19	KOG3455	GO:0016021	LOC_Os12g43670.1	ergosterol biosynthetic protein 28, putative, expressed
AT1G10040.1	9	9	9	9	-0.0679962	alpha/beta-Hydrolases superfamily protein		PF01764	PTHR12482	KOG4372	GO:0006629	LOC_Os03g51670.1	serine esterase family protein, putative, expressed
AT1G10050.3	40	57	39	57	0.542331	glycosyl hydrolase family 10 protein / carbohydrate-binding domain-containing protein		PF00331,PF02018	PTHR31490,PTHR31490:SF1		GO:0005975,GO:0004553,GO:0016798	LOC_Os07g27320.1	glycosyl hydrolase family 10 protein, putative, expressed
AT1G10060.5	12	13	11	13	0.189535	branched-chain amino acid transaminase 1	BCAT-1	PF01063	PTHR11825,PTHR11825:SF54	KOG0975	GO:0008152,GO:0003824	LOC_Os03g01600.1	aminotransferase domain containing protein, putative, expressed
AT1G10070.1	83	58	83	58	-0.503489	branched-chain amino acid transaminase 2	BCAT-2	PF01063	PTHR11825,PTHR11825:SF42		GO:0008152,GO:0003824	LOC_Os03g01600.1	aminotransferase domain containing protein, putative, expressed
AT1G10090.1	163	106	162	106	-0.602947	Early-responsive to dehydration stress protein (ERD4)		PF13967,PF02714	PTHR13018,PTHR13018:SF31		GO:0016020	LOC_Os12g43720.1	early-responsive to dehydration protein-related, putative, expressed
AT1G10095.1	44	36	44	36	-0.296218	Protein prenylyltransferase superfamily protein		PF01239	PTHR11129,PTHR11129:SF3		GO:0018342,GO:0008318	LOC_Os01g49060.1	prenyltransferase, putative, expressed
AT1G10110.1	12	14	12	14	0.235855	F-box family protein		PF00646	PTHR20995,PTHR20995:SF21		GO:0005515	LOC_Os11g38070.1	expressed protein
AT1G10120.1	240	443	239	444	0.896119	basic helix-loop-helix (bHLH) DNA-binding superfamily protein		PF00010	PTHR12565,PTHR12565:SF129	KOG1319	GO:0046983	LOC_Os03g51910.1	basic helix-loop-helix protein, putative, expressed
AT1G10130.1	702	644	698	647	-0.111022	endoplasmic reticulum-type calcium-transporting ATPase 3	ECA3	PF00690,PF13246,PF00689,PF00122	PTHR24093,PTHR24093:SF353		GO:0046872,GO:0000166	LOC_Os03g52090.1	calcium-transporting ATPase 3, endoplasmic reticulum-type, putative, expressed
AT1G10140.1	57	34	56	34	-0.719054	Uncharacterized conserved protein UCP031279			PTHR33526,PTHR33526:SF2			LOC_Os07g03170.1	expressed protein
AT1G10150.1	194	233	193	233	0.274605	Carbohydrate-binding protein			PTHR21477,PTHR21477:SF12			LOC_Os03g56000.1	PHLOEM 2-LIKE A10, putative, expressed
AT1G10155.1	195	237	194	237	0.291797	phloem protein 2-A10	PP2-A10	PF14299	PTHR32278,PTHR32278:SF8			LOC_Os01g06500.2	PHLOEM 2-LIKE A5, putative, expressed
AT1G10170.4	689	469	685	470	-0.54303	NF-X-like 1	NFXL1	PF01422	PTHR12360,PTHR12360:SF0		GO:0008270,GO:0006355,GO:0005634,GO:0003700	LOC_Os06g14190.1	NF-X1-type zinc finger protein, putative, expressed
AT1G10180.1	404	353	401	354	-0.17947	LOW protein: exocyst complex component-like protein			PTHR21426,PTHR21426:SF2			LOC_Os07g38060.1	expressed protein
AT1G10190.1	201	107	199	107	-0.899035	NEP-interacting protein, putative (DUF239)		PF14365,PF03080	PTHR31589,PTHR31589:SF2			LOC_Os03g59240.1	carboxyl-terminal peptidase, putative, expressed
AT1G10200.1	648	853	645	856	0.409976	GATA type zinc finger transcription factor family protein	WLIM1	PF00412	PTHR24206,PTHR24206:SF35	KOG1700	GO:0008270	LOC_Os12g32620.1	OsWLIM1 - LIM domain protein, putative actin-binding protein and transcription factor, expressed
AT1G10230.1	150	150	149	150	0.0135929	E3 ubiquitin ligase SCF complex subunit SKP1/ASK1 family protein	SK18	PF03931,PF01466	PTHR11165	KOG1724	GO:0006511	LOC_Os08g28820.1	Skp1 family, dimerisation domain containing protein, expressed
AT1G10240.1	124	123	123	123	0.0076246	FAR1-related sequence 11	FRS11	PF04434,PF10551,PF03101	PTHR31669,PTHR31669:SF34		GO:0008270,GO:0006355	LOC_Os04g36590.1	transposon protein, putative, unclassified, expressed
AT1G10270.1	239	156	237	157	-0.598947	glutamine-rich protein 23	GRP23	PF01535,PF13041	PTHR24015,PTHR24015:SF393			LOC_Os05g30240.1	PPR repeat domain containing protein, putative, expressed
AT1G10280.1	109	93	108	93	-0.21666	Core-2/I-branching beta-1,6-N-acetylglucosaminyltransferase family protein		PF02485	PTHR31042,PTHR31042:SF3		GO:0016020,GO:0008375	LOC_Os08g01890.1	DNA binding protein, putative, expressed
AT1G10290.1	1370	1173	1363	1178	-0.210498	dynamin-like protein 6	ADL6	PF01926,PF02212,PF00169,PF01031	PTHR11566,PTHR11566:SF57	KOG0446	GO:0005525,GO:0003924	LOC_Os02g50550.1	dynamin, putative, expressed
AT1G10300.1	15	50	15	50	1.73541	Nucleolar GTP-binding protein		PF06858,PF08155	PTHR11702,PTHR11702:SF4		GO:0005525	LOC_Os06g09570.1	nucleolar GTP-binding protein 1, putative, expressed
AT1G10310.1	253	284	252	285	0.177669	NAD(P)-binding Rossmann-fold superfamily protein		PF13561	PTHR24322,PTHR24322:SF500	KOG0725		LOC_Os02g35170.1	uncharacterized oxidoreductase yoxD, putative, expressed
AT1G10320.1	181	181	180	181	0.0134363	Zinc finger C-x8-C-x5-C-x3-H type family protein		PF13893,PF00642	PTHR12620,PTHR12620:SF4	KOG2202	GO:0046872,GO:0005634,GO:0003723	LOC_Os02g35150.1	splicing factor U2AF, putative, expressed
AT1G10330.1	24	16	24	16	-0.617487	Tetratricopeptide repeat (TPR)-like superfamily protein		PF13041	PTHR24015			LOC_Os05g18950.1	pentatricopeptide, putative, expressed
AT1G10340.1	8	7	7	7	-0.0863204	Ankyrin repeat family protein		PF13962,PF12796	PTHR24177,PTHR24177:SF18	KOG4412		LOC_Os08g42960.1	ankyrin repeat-containing protein, putative, expressed
AT1G10350.1	136	136	135	137	0.0134896	DNAJ heat shock family protein		PF00226,PF01556	PTHR24078,PTHR24078:SF317	KOG0714		LOC_Os05g48810.1	dnaJ domain containing protein, expressed
AT1G10360.1	340	322	338	323	-0.0629008	glutathione S-transferase TAU 18	GSTU18	PF14497,PF13417	PTHR11260,PTHR11260:SF312	KOG0406	GO:0005515	LOC_Os10g38580.1	glutathione S-transferase, putative, expressed
AT1G10370.1	775	588	770	590	-0.385197	Glutathione S-transferase family protein	ERD9	PF00043,PF13417	PTHR11260,PTHR11260:SF312	KOG0406	GO:0005515	LOC_Os10g38140.1	glutathione S-transferase, putative, expressed
AT1G10380.1	240	186	238	187	-0.351437	Putative membrane lipoprotein		PF14380,PF13947	PTHR33355,PTHR33355:SF2		GO:0030247	LOC_Os06g25950.1	expressed protein
AT1G10385.1	8	6	8	6	-0.401575	Vps51/Vps67 family (components of vesicular transport) protein		PF08700,PF16528	PTHR21426,PTHR21426:SF15	KOG2215		LOC_Os07g10110.1	expressed protein
AT1G10390.1	689	724	685	727	0.0859882	Nucleoporin autopeptidase		PF04096	PTHR23198,PTHR23198:SF4	KOG0845	GO:0006810,GO:0005643	LOC_Os12g06890.1	OsNucAP3 - Putative Nucleoporin Autopeptidase homologue, expressed
AT1G10395.1	47	18	46	18	-1.39605	hypothetical protein
AT1G10410.1	402	371	399	372	-0.100563	CW14 protein (DUF1336)		PF07059	PTHR31558,PTHR31558:SF3			LOC_Os03g48660.1	DUF1336 domain containing protein, expressed
AT1G10430.1	116	86	115	86	-0.41845	protein phosphatase 2A-2	PP2A-2	PF00149	PTHR11668,PTHR11668:SF248		GO:0016787	LOC_Os02g12580.1	OsPP2Ac-3 - Phosphatase 2A isoform 3 belonging to family 1, expressed
AT1G10450.3	323	218	321	219	-0.553648	paired amphipathic helix Sin3-like protein	SNL6	PF02671,PF08295,PF16879	PTHR12346,PTHR12346:SF8	KOG4204	GO:0006355	LOC_Os01g01960.1	transcriptional repressor, putative, expressed
AT1G10460.1	9	12	9	12	0.4285	germin-like protein 7	GLP7	PF07883	PTHR31238,PTHR31238:SF5			LOC_Os03g08150.1	Cupin domain containing protein, expressed
AT1G10470.1	246	249	245	250	0.030941	response regulator 4	ARR4	PF00072	PTHR26402,PTHR26402:SF526		GO:0000160	LOC_Os11g04720.2	OsRR10 type-A response regulator, expressed
AT1G10490.1	223	250	222	250	0.175486	GNAT acetyltransferase (DUF699)		PF13725,PF08351,PF05127,PF13718	PTHR10925,PTHR10925:SF5		GO:0008080	LOC_Os12g07300.1	N-acetyltransferase 10, putative, expressed
AT1G10500.1	379	413	377	415	0.13741	chloroplast-localized ISCA-like protein	CPISCA	PF01521	PTHR10072,PTHR10072:SF48	KOG1120		LOC_Os06g05400.1	IscA-like iron-sulfur assembly protein, mitochondrial precursor, putative, expressed
AT1G10510.1	392	308	390	309	-0.334452	RNI-like superfamily protein	emb2004	PF00560	PTHR24106	KOG4308	GO:0005515	LOC_Os06g13050.1	peroxidase family protein, expressed
AT1G10520.1	7	5	6	5	-0.51854	DNA polymerase lambda (POLL)	Pol{lambda}	PF01909,PF14716,PF14791,PF10391	PTHR11276,PTHR11276:SF1	KOG2534	GO:0016779,GO:0034061,GO:0005634,GO:0003677	LOC_Os06g13020.2	DNA polymerase lambda, putative, expressed
AT1G10522.1	171	195	170	195	0.199126	Serine/Threonine-kinase	PRIN2		PTHR35987,PTHR35987:SF2			LOC_Os09g21460.1	expressed protein
AT1G10530.1	11	6	11	6	-0.986694	D-ribose-binding periplasmic protein		PF14009	PTHR33413,PTHR33413:SF4			LOC_Os02g50810.1	expressed protein
AT1G10540.1	1363	1249	1355	1253	-0.112632	nucleobase-ascorbate transporter 8	NAT8	PF00860	PTHR11119,PTHR11119:SF50		GO:0055085,GO:0016020,GO:0006810,GO:0005215	LOC_Os02g50820.1	nucleobase-ascorbate transporter, putative, expressed
AT1G10550.1	11	172	11	173	3.98036	xyloglucan:xyloglucosyl transferase 33	XTH33	PF06955,PF00722	PTHR31062,PTHR31062:SF25		GO:0048046,GO:0016762,GO:0006073,GO:0005618,GO:0005975,GO:0004553	LOC_Os09g23220.1	glycosyl hydrolases family 16, putative, expressed
AT1G10560.1	80	45	79	45	-0.823519	plant U-box 18	PUB18	PF00514,PF04564	PTHR23315,PTHR23315:SF116		GO:0005515,GO:0016567,GO:0004842	LOC_Os08g32060.1	spotted leaf 11, putative, expressed
AT1G10570.1	253	244	252	245	-0.03875	Cysteine proteinases superfamily protein	OTS2	PF02902	PTHR12606,PTHR12606:SF28	KOG0779	GO:0008234,GO:0006508	LOC_Os06g29310.1	ulp1 protease family protein, putative, expressed
AT1G10580.1	467	475	464	477	0.0394969	Transducin/WD40 repeat-like superfamily protein		PF00400	PTHR22847,PTHR22847:SF474		GO:0005515	LOC_Os03g27970.1	WD domain, G-beta repeat domain containing protein, expressed
AT1G10590.3	316	399	314	400	0.350424	Nucleic acid-binding, OB-fold-like protein			PTHR31472			LOC_Os05g01050.3	DNA-binding protein-related, putative, expressed
AT1G10600.1	110	103	109	103	-0.0881675	associated molecule with the SH3 domain of STAM 2	AMSH2	PF01398	PTHR12947,PTHR12947:SF9		GO:0005515	LOC_Os01g31470.1	mov34/MPN/PAD-1 family protein, expressed
AT1G10610.1	21	34	21	34	0.686653	basic helix-loop-helix (bHLH) DNA-binding superfamily protein		PF00010,PF14215	PTHR31945,PTHR31945:SF14		GO:0046983	LOC_Os02g02820.1	helix-loop-helix DNA-binding domain containing protein, expressed
AT1G10620.1	13	28	13	28	1.12095	Protein kinase superfamily protein	PERK11	PF07714	PTHR27001,PTHR27001:SF36	KOG1187	GO:0006468,GO:0004672	LOC_Os06g29080.1	expressed protein
AT1G10630.1	403	474	400	476	0.249234	ADP-ribosylation factor A1F	ARFA1F	PF09439	PTHR11711,PTHR11711:SF181	KOG0070		LOC_Os01g59790.1	ADP-ribosylation factor, putative, expressed
AT1G10640.1	1707	975	1698	979	-0.794508	Pectin lyase-like superfamily protein		PF00295	PTHR31375,PTHR31375:SF46		GO:0005975,GO:0004650	LOC_Os01g44970.1	polygalacturonase, putative, expressed
AT1G10650.1	199	179	197	180	-0.1357	SBP (S-ribonuclease binding protein) family protein			PTHR10044,PTHR10044:SF108	KOG1100		LOC_Os02g03760.2	expressed protein
AT1G10657.1	331	309	329	310	-0.085614	transmembrane protein		PF09713	PTHR31871,PTHR31871:SF5			LOC_Os05g38680.1	plant-specific domain TIGR01589 family protein, expressed
AT1G10660.1	64	49	63	49	-0.360541	transmembrane protein			PTHR12242,PTHR12242:SF10			LOC_Os01g07700.3	expressed protein
AT1G10670.3	141	118	140	118	-0.244097	ATP-citrate lyase A-1	ACLA-1	PF08442,PF16114	PTHR23118			LOC_Os12g37870.1	ATP-grasp domain containing protein, expressed
AT1G10680.1	134	115	133	115	-0.207991	P-glycoprotein 10	PGP10	PF00005,PF00664	PTHR24221,PTHR24221:SF138		GO:0016887,GO:0005524,GO:0055085,GO:0042626,GO:0016021,GO:0006810	LOC_Os02g46680.1	multidrug resistance protein, putative, expressed
AT1G10690.1	29	23	29	23	-0.320829	cyclin-dependent kinase inhibitor			PTHR33142,PTHR33142:SF2			LOC_Os01g62584.1	peptidase aspartic family protein, putative, expressed
AT1G10700.1	92	96	91	96	0.0826642	phosphoribosyl pyrophosphate (PRPP) synthase 3	PRS3	PF13793,PF00156	PTHR10210,PTHR10210:SF45	KOG1448	GO:0009116	LOC_Os01g52530.1	phosphoribosyl transferase, putative, expressed
AT1G10710.1	8	4	8	4	-0.986538	poor homologous synapsis 1	PHS1
AT1G10715.1	25	15	25	15	-0.723124	EMBRYO SURROUNDING FACTOR-like protein
AT1G10717.1	39	41	39	41	0.0856121	EMBRYO SURROUNDING FACTOR-like protein
AT1G10720.1	226	255	225	256	0.184816	BSD domain-containing protein		PF03909	PTHR31923,PTHR31923:SF11			LOC_Os03g52000.1	BSD domain containing protein, expressed
AT1G10730.1	119	118	118	118	0.00111949	Clathrin adaptor complexes medium subunit family protein		PF01217,PF00928	PTHR10529			LOC_Os01g50770.1	adaptor complexes medium subunit family domain containing protein, expressed
AT1G10740.1	265	215	263	216	-0.285563	alpha/beta-Hydrolases superfamily protein			PTHR34043,PTHR34043:SF1			LOC_Os05g33820.1	lipase, putative, expressed
AT1G10745.1	76	89	76	89	0.232931	maternally expressed family protein
AT1G10750.1	18	19	17	19	0.132125	carboxyl-terminal peptidase, putative (DUF239)		PF14365,PF03080	PTHR31589,PTHR31589:SF19			LOC_Os01g36660.1	carboxyl-terminal peptidase, putative, expressed
AT1G10760.1	238	214	236	214	-0.14053	Pyruvate phosphate dikinase, PEP/pyruvate binding domain-containing protein	SEX1	PF01326	PTHR22931,PTHR22931:SF1		GO:0016310,GO:0016301,GO:0005524	LOC_Os06g30310.1	alpha-glucan water dikinase, chloroplast precursor, putative, expressed
AT1G10770.1	216	231	214	231	0.110404	Plant invertase/pectin methylesterase inhibitor superfamily protein		PF04043	PTHR31707		GO:0004857	LOC_Os05g20570.1	invertase/pectin methylesterase inhibitor family protein, putative, expressed
AT1G10780.2	74	72	73	72	-0.0165255	F-box/RNI-like superfamily protein		PF12937	PTHR32212,PTHR32212:SF82		GO:0005515	LOC_Os09g28120.1	OsFBX330 - F-box domain containing protein, expressed
AT1G10790.1	40	25	40	25	-0.665065	hydroxyproline-rich glycoprotein family protein			PTHR33826,PTHR33826:SF4			LOC_Os01g71220.1	zinc finger protein, putative, expressed
AT1G10800.2	2	7	1	7	2.23462	voltage-gated hydrogen channel-like protein
AT1G10810.1	3	8	3	8	1.42921	NAD(P)-linked oxidoreductase superfamily protein		PF00248	PTHR11732,PTHR11732:SF12	KOG1575		LOC_Os04g26910.1	oxidoreductase, aldo/keto reductase family protein, putative, expressed
AT1G10820.2	79	53	79	53	-0.576329	hypothetical protein (DUF3755)		PF12579	PTHR14000,PTHR14000:SF6			LOC_Os04g44210.1	expressed protein
AT1G10830.1	228	214	226	215	-0.0747527	15-cis-zeta-carotene isomerase	Z-ISO	PF07298	PTHR35988,PTHR35988:SF2			LOC_Os12g21710.1	nnrU, putative, expressed
AT1G10840.1	1070	1154	1064	1158	0.121875	translation initiation factor 3 subunit H1	TIF3H1	PF01398	PTHR10410,PTHR10410:SF3	KOG1560	GO:0005515,GO:0005852,GO:0005737,GO:0003743	LOC_Os04g30780.1	eukaryotic translation initiation factor 3 subunit H, putative, expressed
AT1G10850.1	848	794	843	797	-0.082408	Leucine-rich repeat protein kinase family protein		PF13855,PF08263,PF00069	PTHR27008,PTHR27008:SF40	KOG1187	GO:0005515,GO:0006468,GO:0005524,GO:0004672	LOC_Os02g58390.1	inactive receptor kinase At2g26730 precursor, putative, expressed
AT1G10865.1	87	140	87	141	0.699761	cytochrome C oxidase assembly factor		PF10203	PTHR28627	KOG4114		LOC_Os09g34310.3	expressed protein
AT1G10870.2	407	415	405	416	0.0398628	ARF-GAP domain 4	AGD4	PF12796,PF03114,PF00169,PF01412	PTHR23180,PTHR23180:SF244		GO:0005737,GO:0005515,GO:0005096	LOC_Os02g42134.2	ARF GTPase-activating domain-containing protein, putative, expressed
AT1G10890.1	225	265	223	266	0.252688	arginine/glutamate-rich 1 protein		PF15346	PTHR31711			LOC_Os10g15390.1	ribosomal protein S7, putative, expressed
AT1G10900.1	127	99	126	99	-0.345837	Phosphatidylinositol-4-phosphate 5-kinase family protein		PF02493,PF01504	PTHR23086,PTHR23086:SF25		GO:0046488,GO:0016307	LOC_Os03g49510.1	phosphatidylinositol-4-phosphate 5-kinase, putative, expressed
AT1G10910.1	258	201	256	201	-0.347515	Pentatricopeptide repeat (PPR) superfamily protein	EMB3103	PF13041	PTHR24015,PTHR24015:SF367			LOC_Os01g37870.4	PPR repeat domain containing protein, putative, expressed
AT1G10920.1	55	60	54	60	0.14011	NB-ARC domain-containing disease resistance protein	LOV1	PF00931	PTHR23155,PTHR23155:SF549		GO:0043531	LOC_Os09g09490.1	disease resistance protein RPM1, putative, expressed
AT1G10930.1	202	183	200	183	-0.129435	DNA helicase (RECQl4A)	RECQ4A	PF16124,PF00570,PF00270,PF00271,PF09382	PTHR13710,PTHR13710:SF94		GO:0005622,GO:0003676,GO:0005524,GO:0043140,GO:0006281,GO:0006260	LOC_Os04g35420.1	helicase conserved C-terminal domain containing protein, expressed
AT1G10940.2	669	748	665	750	0.173493	Protein kinase superfamily protein	SNRK2.4	PF00069	PTHR24343,PTHR24343:SF101	KOG0583	GO:0006468,GO:0005524,GO:0004672	LOC_Os04g35240.1	CAMK_CAMK_like.25 - CAMK includes calcium/calmodulin depedent protein kinases, expressed
AT1G10950.1	2273	2102	2260	2110	-0.0994034	transmembrane nine 1	TMN1	PF02990	PTHR10766,PTHR10766:SF52		GO:0016021	LOC_Os11g07910.1	transmembrane 9 superfamily member, putative, expressed
AT1G10960.1	3206	2868	3188	2879	-0.147338	ferredoxin 1	FD1	PF00111	PTHR19370,PTHR19370:SF120		GO:0051536,GO:0009055	LOC_Os08g01380.1	2Fe-2S iron-sulfur cluster binding domain containing protein, expressed
AT1G10970.1	149	154	148	155	0.0656946	zinc transporter	ZIP4	PF02535	PTHR11040,PTHR11040:SF44	KOG1558	GO:0055085,GO:0046873,GO:0030001,GO:0016020	LOC_Os06g37010.2	metal cation transporter, putative, expressed
AT1G10980.1	32	47	31	47	0.575217	Lung seven transmembrane receptor family protein		PF06814	PTHR21229,PTHR21229:SF1		GO:0016021	LOC_Os03g21690.1	lung seven transmembrane domain containing protein, putative, expressed
AT1G11000.1	26	28	26	28	0.119768	Seven transmembrane MLO family protein	MLO4	PF03094	PTHR31942,PTHR31942:SF9		GO:0016021,GO:0006952	LOC_Os11g07912.1	MLO domain containing protein, putative, expressed
AT1G11020.1	171	185	170	186	0.12697	RING/FYVE/PHD zinc finger superfamily protein		PF12906	PTHR23012,PTHR23012:SF54	KOG1609	GO:0008270	LOC_Os08g29590.1	zinc finger, C3HC4 type family protein, expressed
AT1G11050.1	191	203	190	203	0.0977587	Protein kinase superfamily protein		PF00069	PTHR27006,PTHR27006:SF29	KOG1187	GO:0006468,GO:0005524,GO:0004672	LOC_Os05g34950.1	cysteine-rich receptor-like protein kinase 6 precursor, putative, expressed
AT1G11060.1	192	225	191	226	0.242262	WAPL (Wings apart-like protein regulation of heterochromatin) protein		PF07814	PTHR22100,PTHR22100:SF13			LOC_Os10g35380.1	expressed protein
AT1G11080.2	156	185	155	186	0.264085	serine carboxypeptidase-like 31	scpl31	PF00450	PTHR11802,PTHR11802:SF90		GO:0006508,GO:0004185	LOC_Os05g06660.1	OsSCP26 - Putative Serine Carboxypeptidase homologue, expressed
AT1G11090.1	234	185	233	185	-0.329362	alpha/beta-Hydrolases superfamily protein		PF12695	PTHR11614,PTHR11614:SF20	KOG1455		LOC_Os07g37840.1	lipase, putative, expressed
AT1G11100.4	25	13	25	13	-0.929368	SNF2 domain-containing protein / helicase domain-containing protein / zinc finger protein-like protein		PF00097,PF00271,PF00176	PTHR10799,PTHR10799:SF705		GO:0046872,GO:0005524	LOC_Os01g57110.1	SNF2 family N-terminal domain containing protein, expressed
AT1G11112.1	5	4	5	4	-0.308466	hypothetical protein			PTHR34538,PTHR34538:SF3
AT1G11120.1	82	51	81	51	-0.66264	CTTNBP 2 amino-terminal-like protein			PTHR33728,PTHR33728:SF1			LOC_Os05g35230.1	expressed protein
AT1G11125.1	24	22	23	22	-0.081616	hypothetical protein			PTHR33871,PTHR33871:SF1
AT1G11130.1	33	16	32	16	-1.00851	Leucine-rich repeat protein kinase family protein	SUB	PF13855,PF00069	PTHR27001,PTHR27001:SF91	KOG1187	GO:0005515,GO:0006468,GO:0005524,GO:0004672	LOC_Os02g07960.4	STRUBBELIG-RECEPTOR FAMILY 3 precursor, putative, expressed
AT1G11160.1	59	32	59	32	-0.869244	Transducin/WD40 repeat-like superfamily protein		PF00400,PF13925	PTHR19845,PTHR19845:SF5		GO:0005515	LOC_Os04g58130.1	katanin p80 WD40 repeat-containing subunit B1 homolog 1, putative, expressed
AT1G11180.2	89	77	89	77	-0.195475	Secretory carrier membrane protein (SCAMP) family protein	SCAMP2	PF04144	PTHR10687,PTHR10687:SF22	KOG3088	GO:0016021,GO:0015031	LOC_Os07g37740.1	secretory carrier-associated membrane protein, putative, expressed
AT1G11190.1	55	32	54	32	-0.777566	bifunctional nuclease i	BFN1	PF02265	PTHR33146,PTHR33146:SF4		GO:0006308,GO:0004519,GO:0003676	LOC_Os04g54390.1	nuclease PA3, putative, expressed
AT1G11200.1	95	115	94	115	0.290212	organic solute transporter ostalpha protein (DUF300)		PF03619	PTHR23423,PTHR23423:SF15	KOG2641		LOC_Os07g32230.1	domain of unknown function domain containing protein, expressed
AT1G11210.1	17	14	17	14	-0.319106	cotton fiber protein, putative (DUF761)		PF14364	PTHR33098,PTHR33098:SF10			LOC_Os07g37620.1	fiber expressed protein, putative, expressed
AT1G11220.2	25	18	25	18	-0.460617	cotton fiber, putative (DUF761)		PF14364	PTHR33098,PTHR33098:SF10			LOC_Os04g57970.1	expressed protein
AT1G11240.1	198	231	197	231	0.23266	ribosomal RNA-processing protein		PF09805	PTHR14577	KOG4709		LOC_Os03g23020.1	expressed protein
AT1G11250.1	7	8	6	8	0.313308	syntaxin of plants 125	SYP125	PF05739,PF00804	PTHR19957,PTHR19957:SF80	KOG0810	GO:0005515,GO:0016020	LOC_Os06g39050.1	syntaxin, putative, expressed
AT1G11260.1	795	2079	791	2087	1.39999	sugar transporter 1	STP1	PF07690	PTHR23500,PTHR23500:SF55	KOG0254	GO:0055085,GO:0016021	LOC_Os07g01560.1	transporter family protein, putative, expressed
AT1G11270.1	49	40	49	40	-0.298122	F-box and associated interaction domains-containing protein		PF07734,PF00646	PTHR31945,PTHR31945:SF5		GO:0005515	LOC_Os09g27660.3	OsFBO21 - F-box and other domain containing protein, expressed
AT1G11280.1	6	2	6	2	-1.98464	S-locus lectin protein kinase family protein		PF08276,PF01453,PF00954,PF07714	PTHR27002,PTHR27002:SF84	KOG1187	GO:0048544,GO:0006468,GO:0004672	LOC_Os03g35600.1	serine/threonine-protein kinase receptor precursor, putative, expressed
AT1G11290.1	51	52	50	52	0.0416957	Pentatricopeptide repeat (PPR) superfamily protein	CRR22	PF14432,PF01535,PF13041	PTHR24015,PTHR24015:SF605			LOC_Os06g02200.1	pentatricopeptide, putative, expressed
AT1G11300.1	6	11	6	11	0.887931	G-type lectin S-receptor-like Serine/Threonine-kinase		PF08276,PF01453,PF00954,PF07714	PTHR27002,PTHR27002:SF157	KOG1187	GO:0048544,GO:0006468,GO:0004672	LOC_Os03g35600.1	serine/threonine-protein kinase receptor precursor, putative, expressed
AT1G11303.1	14	19	14	19	0.413911	G-type lectin S-receptor-like Serine/Threonine-kinase		PF08276,PF00954,PF01453,PF07714	PTHR27002,PTHR27002:SF157	KOG1187	GO:0048544,GO:0006468,GO:0004672	LOC_Os01g57560.1	serine/threonine-protein kinase receptor precursor, putative, expressed
AT1G11310.1	303	251	301	252	-0.255907	Seven transmembrane MLO family protein	MLO2	PF03094	PTHR31942,PTHR31942:SF29		GO:0016021,GO:0006952	LOC_Os03g03700.1	MLO domain containing protein, putative, expressed
AT1G11320.1	56	53	56	53	-0.0798758	GDSL esterase/lipase			PTHR35097,PTHR35097:SF1			LOC_Os06g50850.1	expressed protein
AT1G11330.2	283	328	281	329	0.22633	S-locus lectin protein kinase family protein		PF08276,PF01453,PF00954,PF07714	PTHR27002,PTHR27002:SF157	KOG1187	GO:0048544,GO:0006468,GO:0004672	LOC_Os07g36570.1	KI domain interacting kinase 1, putative, expressed
AT1G11350.1	138	158	137	158	0.209261	S-domain-1 13	SD1-13	PF08276,PF01453,PF00954,PF07714	PTHR27002,PTHR27002:SF157	KOG1187	GO:0048544,GO:0006468,GO:0004672	LOC_Os07g36590.1	serine/threonine-protein kinase receptor precursor, putative, expressed
AT1G11360.1	350	400	348	401	0.204264	Adenine nucleotide alpha hydrolases-like superfamily protein		PF00582	PTHR31966,PTHR31966:SF3		GO:0006950	LOC_Os01g57450.1	universal stress protein domain containing protein, putative, expressed
AT1G11370.1	14	10	13	10	-0.41936	Pectin lyase-like superfamily protein		PF01095	PTHR31707		GO:0042545,GO:0030599,GO:0005618	LOC_Os01g57854.1	pectinesterase, putative, expressed
AT1G11380.1	56	86	55	86	0.645411	PLAC8 family protein		PF04749	PTHR15907,PTHR15907:SF36			LOC_Os07g36820.1	uncharacterized Cys-rich domain containing protein, putative, expressed
AT1G11390.1	163	172	162	173	0.095422	Protein kinase superfamily protein		PF03109	PTHR10566,PTHR10566:SF93			LOC_Os04g56510.1	ABC1 family domain containing protein, putative, expressed
AT1G11400.1	139	179	138	180	0.378199	partner of Y14-MAGO	PYM	PF09282	PTHR22959,PTHR22959:SF0	KOG4325		LOC_Os03g15560.1	wibg, putative, expressed
AT1G11410.4	236	180	235	180	-0.381277	S-locus lectin protein kinase family protein		PF08276,PF01453,PF00954,PF07714	PTHR27002,PTHR27002:SF100	KOG1187	GO:0048544,GO:0006468,GO:0004672	LOC_Os07g36544.2	serine/threonine-protein kinase receptor precursor, putative, expressed
AT1G11420.1	35	33	34	33	-0.0506793	agenet domain protein (DOMAIN OF UNKNOWN FUNCTION 724 2)	DUF2	PF05641,PF05266	PTHR31917,PTHR31917:SF20			LOC_Os11g35060.1	agenet domain containing protein, expressed
AT1G11430.1	790	719	785	722	-0.121508	plastid developmental protein DAG	MORF9		PTHR31346,PTHR31346:SF3			LOC_Os08g04450.2	DAG protein, chloroplast precursor, putative, expressed
AT1G11440.1	77	77	77	77	0.00412704	hypothetical protein			PTHR33971,PTHR33971:SF3			LOC_Os06g12580.1	pro-resilin precursor, putative, expressed
AT1G11450.3	5	9	5	9	0.861459	nodulin MtN21 /EamA-like transporter family protein	UMAMIT27	PF00892	PTHR31218,PTHR31218:SF10		GO:0016021,GO:0016020,GO:0022857	LOC_Os02g01326.1	auxin-induced protein 5NG4, putative, expressed
AT1G11475.1	233	291	232	292	0.331673	RNA polymerases N / 8 kDa subunit	NRPB10	PF01194	PTHR23431,PTHR23431:SF2	KOG3497	GO:0006351,GO:0003899,GO:0003677	LOC_Os11g08940.1	RNA polymerases N 8 kDa subunit, putative, expressed
AT1G11480.1	374	374	372	375	0.0115476	eukaryotic translation initiation factor-like protein			PTHR32091,PTHR32091:SF4			LOC_Os07g36200.1	eukaryotic translation initiation factor-related, putative, expressed
AT1G11500.3	10	11	9	11	0.157386	transmembrane protein, putative (DUF1218)		PF06749	PTHR31769,PTHR31769:SF14			LOC_Os07g36110.2	expressed protein
AT1G11510.1	5	7	4	7	0.651304	DNA-binding storekeeper protein-related transcriptional regulator		PF04504	PTHR31662,PTHR31662:SF1			LOC_Os03g25430.1	transcription regulator, putative, expressed
AT1G11530.1	39	58	39	58	0.586136	C-terminal cysteine residue is changed to a serine 1	CXXS1	PF00085	PTHR10438,PTHR10438:SF242	KOG0907	GO:0045454,GO:0015035,GO:0006662	LOC_Os04g53740.1	thioredoxin, putative, expressed
AT1G11540.2	24	13	23	13	-0.840608	Sulfite exporter TauE/SafE family protein		PF01925	PTHR14255,PTHR14255:SF3		GO:0016021	LOC_Os01g57710.1	membrane protein, putative, expressed
AT1G11545.1	231	685	229	688	1.58476	xyloglucan endotransglucosylase/hydrolase 8	XTH8	PF06955,PF00722	PTHR31062,PTHR31062:SF1		GO:0048046,GO:0016762,GO:0006073,GO:0005618,GO:0005975,GO:0004553	LOC_Os07g34580.1	glycosyl hydrolases family 16, putative, expressed
AT1G11570.3	32	17	31	17	-0.876748	NTF2-like protein	NTL	PF02136	PTHR12612,PTHR12612:SF10	KOG2104	GO:0006810,GO:0005622	LOC_Os08g42000.1	nuclear transport factor, putative, expressed
AT1G11580.2	926	790	921	793	-0.215903	methylesterase PCR A	PMEPCRA	PF04043,PF01095	PTHR31707,PTHR31707:SF32		GO:0004857,GO:0042545,GO:0030599,GO:0005618	LOC_Os01g57854.1	pectinesterase, putative, expressed
AT1G11590.1	729	643	725	645	-0.168795	Plant invertase/pectin methylesterase inhibitor superfamily		PF04043,PF01095	PTHR31707,PTHR31707:SF60		GO:0004857,GO:0042545,GO:0030599,GO:0005618	LOC_Os01g57854.1	pectinesterase, putative, expressed
AT1G11591.1	56	59	55	59	0.0894323	hypothetical protein
AT1G11593.1	84	69	83	69	-0.272407	Plant invertase/pectin methylesterase inhibitor superfamily protein		PF04043			GO:0004857
AT1G11630.1	86	110	85	110	0.376956	Tetratricopeptide repeat (TPR)-like superfamily protein		PF13041	PTHR24015,PTHR24015:SF579			LOC_Os01g58080.2	membrane-associated salt-inducible protein, putative, expressed
AT1G11650.2	2303	2457	2290	2466	0.106872	RNA-binding (RRM/RBD/RNP motifs) family protein	RBP45B	PF00076	PTHR24012,PTHR24012:SF333	KOG0148	GO:0003676	LOC_Os03g37270.1	RNA recognition motif containing protein, putative, expressed
AT1G11660.1	86	76	85	76	-0.156039	heat shock protein 70 (Hsp 70) family protein		PF00012	PTHR19375,PTHR19375:SF149			LOC_Os06g46600.1	DnaK family protein, putative, expressed
AT1G11670.1	209	210	208	210	0.0168678	MATE efflux family protein		PF01554	PTHR11206,PTHR11206:SF140	KOG1347	GO:0055085,GO:0016020,GO:0015297,GO:0015238,GO:0006855	LOC_Os03g37490.1	MATE efflux family protein, putative, expressed
AT1G11680.1	1399	1299	1391	1304	-0.0929915	CYTOCHROME P450 51G1	CYP51G1	PF00067	PTHR24286,PTHR24286:SF24		GO:0055114,GO:0020037,GO:0016705,GO:0005506	LOC_Os11g32240.1	cytochrome P450 51, putative, expressed
AT1G11700.1	227	184	226	185	-0.289541	senescence regulator (Protein of unknown function, DUF584)		PF04520	PTHR33083,PTHR33083:SF11			LOC_Os01g64300.1	DUF584 domain containing protein, putative, expressed
AT1G11710.1	18	22	17	22	0.343717	Pentatricopeptide repeat (PPR) superfamily protein		PF01535,PF13041	PTHR24015,PTHR24015:SF566			LOC_Os05g19390.1	PPR repeat containing protein, expressed
AT1G11720.2	185	98	184	98	-0.903013	starch synthase 3	SS3	PF08323,PF16760	PTHR12526,PTHR12526:SF341			LOC_Os04g53310.1	soluble starch synthase 3, chloroplast precursor, putative, expressed
AT1G11730.1	49	40	48	40	-0.282636	Galactosyltransferase family protein		PF02434,PF13334	PTHR11214,PTHR11214:SF109	KOG2288	GO:0016757,GO:0016020,GO:0008378,GO:0006486	LOC_Os03g38050.1	galactosyltransferase, putative, expressed
AT1G11740.1	22	15	21	15	-0.554319	ankyrin repeat family protein		PF13637,PF11904	PTHR12447,PTHR12447:SF7			LOC_Os02g56530.1	ankyrin repeat domain containing protein, expressed
AT1G11750.2	764	856	759	859	0.178444	CLP protease proteolytic subunit 6	CLPP6	PF00574	PTHR10381,PTHR10381:SF8	KOG0840		LOC_Os03g29810.1	OsClp6 - Putative Clp protease homologue, expressed
AT1G11755.1	115	86	114	86	-0.405763	Undecaprenyl pyrophosphate synthetase family protein	LEW1		PTHR21528,PTHR21528:SF0			LOC_Os03g10080.3	expressed protein
AT1G11760.1	100	79	99	79	-0.328632	mediator of RNA polymerase II transcription subunit-like protein	MED32		PTHR35989,PTHR35989:SF1			LOC_Os10g40070.1	expressed protein
AT1G11765.1	31	33	31	33	0.0815463	Plant self-incompatibility protein S1 family		PF05938	PTHR31232,PTHR31232:SF2
AT1G11770.1	76	73	75	73	-0.0453032	FAD-binding Berberine family protein		PF08031,PF01565	PTHR32448,PTHR32448:SF34		GO:0055114,GO:0050660,GO:0016491	LOC_Os06g35590.1	reticuline oxidase-like protein precursor, putative, expressed
AT1G11780.1	80	100	79	100	0.337095	oxidoreductase, 2OG-Fe(II) oxygenase family protein		PF13532	PTHR16557,PTHR16557:SF2	KOG2731		LOC_Os11g29690.1	oxidoreductase, 2OG-Fe oxygenase family protein, putative, expressed
AT1G11790.1	235	273	233	274	0.230153	arogenate dehydratase 1	ADT1	PF00800	PTHR21022,PTHR21022:SF4		GO:0009094,GO:0004664	LOC_Os03g17730.1	P-protein, putative, expressed
AT1G11800.1	100	109	99	109	0.137797	endonuclease/exonuclease/phosphatase family protein		PF03372	PTHR15822,PTHR15822:SF4	KOG2756		LOC_Os12g22620.1	endonuclease/Exonuclease/phosphatase family protein, expressed
AT1G11810.1	19	24	18	24	0.358377	F-box associated ubiquitination effector family protein		PF00646,PF07734	PTHR32133,PTHR32133:SF82		GO:0005515	LOC_Os09g30180.3	OsFBX331 - F-box domain containing protein, expressed
AT1G11820.2	444	386	441	387	-0.188744	O-Glycosyl hydrolases family 17 protein		PF07983,PF00332	PTHR32227,PTHR32227:SF120		GO:0005975,GO:0004553	LOC_Os07g32600.1	glucan endo-1,3-beta-glucosidase precursor, putative, expressed
AT1G11840.6	1861	2178	1851	2187	0.240375	glyoxalase/bleomycin resistance protein/dioxygenase superfamily protein	GLX1	PF00903	PTHR10374,PTHR10374:SF17	KOG2943		LOC_Os08g09250.2	glyoxalase family protein, putative, expressed
AT1G11850.2	870	1070	865	1074	0.312832	transmembrane protein
AT1G11860.3	5331	5414	5302	5435	0.0358443	Glycine cleavage T-protein family		PF08669,PF01571	PTHR13847,PTHR13847:SF212			LOC_Os04g53230.1	aminomethyltransferase, putative, expressed
AT1G11870.2	143	142	142	143	0.00339232	Seryl-tRNA synthetase	SRS	PF02403,PF00587	PTHR11778,PTHR11778:SF0		GO:0006418,GO:0005524,GO:0004812,GO:0000166,GO:0006434,GO:0005737,GO:0004828	LOC_Os11g39670.1	seryl-tRNA synthetase, putative, expressed
AT1G11880.1	29	22	29	22	-0.418523	transferases, transferring hexosyl groups		PF04188	PTHR12468,PTHR12468:SF2	KOG2647	GO:0006506,GO:0004584	LOC_Os12g31480.1	GPI mannosyltransferase 2, putative, expressed
AT1G11890.1	401	509	398	511	0.357918	Synaptobrevin family protein	SEC22	PF00957,PF13774	PTHR21136,PTHR21136:SF89	KOG0862	GO:0016192,GO:0016021	LOC_Os06g09850.1	25.3 kDa vesicle transport protein, putative, expressed
AT1G11900.1	23	29	23	29	0.348078	Tetratricopeptide repeat (TPR)-like superfamily protein		PF01535,PF13041	PTHR24015,PTHR24015:SF707			LOC_Os05g40320.1	PPR repeat domain containing protein, putative, expressed
AT1G11905.1	176	264	175	265	0.598382	B-cell receptor-associated protein 31-like protein			PTHR12701,PTHR12701:SF18	KOG1962	GO:0016021,GO:0006886,GO:0005783	LOC_Os05g19040.1	prefoldin, putative, expressed
AT1G11910.2	1168	1043	1162	1047	-0.15065	aspartic proteinase A1	APA1	PF05184,PF03489,PF00026	PTHR13683,PTHR13683:SF286	KOG1339	GO:0006629,GO:0006508,GO:0004190	LOC_Os05g49200.1	aspartic proteinase oryzasin-1 precursor, putative, expressed
AT1G11915.1	30	26	30	26	-0.220991	wall-associated receptor kinase galacturonan-binding protein		PF13947	PTHR33355,PTHR33355:SF5		GO:0030247	LOC_Os06g25950.1	expressed protein
AT1G11930.1	704	680	700	683	-0.0355687	Putative pyridoxal phosphate-dependent enzyme, YBL036C type		PF01168	PTHR10146,PTHR10146:SF6	KOG3157		LOC_Os05g05740.1	proline synthetase co-transcribed bacterial homolog protein, putative, expressed
AT1G11940.1	36	54	35	54	0.61939	Core-2/I-branching beta-1,6-N-acetylglucosaminyltransferase family protein		PF02485	PTHR31042,PTHR31042:SF2		GO:0016020,GO:0008375	LOC_Os01g50040.1	DNA binding protein, putative, expressed
AT1G11960.1	63	66	63	66	0.0803453	ERD (early-responsive to dehydration stress) family protein		PF14703,PF13967,PF02714	PTHR13018,PTHR13018:SF47		GO:0016020	LOC_Os01g35050.2	early-responsive to dehydration protein-related, putative, expressed
AT1G11990.2	14	16	13	16	0.257014	O-fucosyltransferase family protein		PF10250	PTHR31933,PTHR31933:SF4			LOC_Os06g35410.1	growth regulator related protein, putative, expressed
AT1G12000.1	1968	2108	1957	2116	0.112983	Phosphofructokinase family protein		PF00365	PTHR13697,PTHR13697:SF26		GO:0006096,GO:0003872	LOC_Os06g13810.1	pyrophosphate--fructose 6-phosphate 1-phosphotransferase subunit beta, putative, expressed
AT1G12010.1	98	75	97	75	-0.364879	2-oxoglutarate (2OG) and Fe(II)-dependent oxygenase superfamily protein		PF14226,PF03171	PTHR10209,PTHR10209:SF193	KOG0143	GO:0055114,GO:0016491	LOC_Os09g27750.1	1-aminocyclopropane-1-carboxylate oxidase 1, putative, expressed
AT1G12020.1	44	75	43	75	0.799295	hypothetical protein			PTHR31903,PTHR31903:SF6			LOC_Os11g29810.1	expressed protein
AT1G12030.1	4	15	3	15	2.11315	phosphoenolpyruvate carboxylase, putative (DUF506)		PF04720	PTHR31579,PTHR31579:SF15			LOC_Os03g58230.1	plant-specific domain TIGR01615 family protein, expressed
AT1G12050.1	806	660	801	663	-0.273978	fumarylacetoacetase		PF09298,PF01557	PTHR11820,PTHR11820:SF1		GO:0009072,GO:0004334,GO:0008152,GO:0003824	LOC_Os02g10310.1	fumarylacetoacetase, putative, expressed
AT1G12060.1	61	76	60	76	0.332983	BCL-2-associated athanogene 5	BAG5	PF02179	PTHR33322,PTHR33322:SF5		GO:0051087	LOC_Os02g48780.1	IQ calmodulin-binding and BAG domain containing protein, putative, expressed
AT1G12070.1	11	12	10	12	0.206284	Immunoglobulin E-set superfamily protein		PF02115	PTHR10980,PTHR10980:SF18	KOG3205	GO:0005737,GO:0005094	LOC_Os02g48730.1	rho GDP-dissociation inhibitor 1, putative, expressed
AT1G12080.2	607	1081	604	1085	0.845384	Vacuolar calcium-binding protein-like protein
AT1G12090.1	6639	7244	6603	7273	0.139274	extensin-like protein	ELP	PF00234	PTHR31731			LOC_Os03g01320.1	LTPL116 - Protease inhibitor/seed storage/LTP family protein precursor, expressed
AT1G12100.1	2	6	1	6	1.88721	Bifunctional inhibitor/lipid-transfer protein/seed storage 2S albumin superfamily protein		PF14547	PTHR31731,PTHR31731:SF8			LOC_Os10g40520.1	LTPL145 - Protease inhibitor/seed storage/LTP family protein precursor, expressed
AT1G12110.1	209	225	208	226	0.119927	nitrate transporter 1.1	NRT1.1	PF00854	PTHR11654,PTHR11654:SF78		GO:0016020,GO:0006810,GO:0005215	LOC_Os10g40600.1	peptide transporter PTR2, putative, expressed
AT1G12120.1	475	581	472	583	0.305571	hypothetical protein (DUF863)		PF05904	PTHR33167			LOC_Os10g40580.1	expressed protein
AT1G12140.1	239	187	238	187	-0.344187	flavin-monooxygenase glucosinolate S-oxygenase 5	FMO GS-OX5	PF13738,PF00743	PTHR23023,PTHR23023:SF94		GO:0055114,GO:0050661,GO:0050660,GO:0004499	LOC_Os10g40570.1	flavin-containing monooxygenase family protein, putative, expressed
AT1G12150.1	15	15	14	15	0.0141786	weak chloroplast movement under blue light protein (DUF827)		PF05701	PTHR32054,PTHR32054:SF3			LOC_Os12g17310.1	prefoldin, putative, expressed
AT1G12160.1	44	36	44	36	-0.276044	Flavin-binding monooxygenase family protein		PF07992,PF00743	PTHR23023,PTHR23023:SF94		GO:0055114,GO:0016491,GO:0050661,GO:0050660,GO:0004499	LOC_Os10g40570.1	flavin-containing monooxygenase family protein, putative, expressed
AT1G12170.1	5	3	5	3	-0.722762	F-box family protein		PF00646,PF07734	PTHR32133,PTHR32133:SF127		GO:0005515	LOC_Os12g06740.1	OsFBX440 - F-box domain containing protein, expressed
AT1G12180.1	218	231	216	232	0.100331	14.7 kDa heat shock-like protein
AT1G12190.1	7	3	7	3	-1.20893	F-box and associated interaction domains-containing protein		PF00646,PF08268	PTHR32133,PTHR32133:SF127		GO:0005515	LOC_Os12g06740.1	OsFBX440 - F-box domain containing protein, expressed
AT1G12200.1	165	90	164	90	-0.864682	Flavin-binding monooxygenase family protein	FMO	PF13738,PF00743	PTHR23023,PTHR23023:SF94		GO:0055114,GO:0050661,GO:0050660,GO:0004499	LOC_Os10g40570.1	flavin-containing monooxygenase family protein, putative, expressed
AT1G12210.1	40	37	40	37	-0.1185	RPS5-like 1	RFL1	PF13855,PF00931	PTHR23155,PTHR23155:SF639		GO:0005515,GO:0043531	LOC_Os01g57870.1	disease resistance protein RPS2, putative, expressed
AT1G12211.1	40	37	40	37	-0.1185	hypothetical protein
AT1G12220.1	20	14	19	14	-0.516937	Disease resistance protein (CC-NBS-LRR class) family	RPS5	PF13855,PF00931	PTHR23155,PTHR23155:SF639		GO:0005515,GO:0043531	LOC_Os01g57870.1	disease resistance protein RPS2, putative, expressed
AT1G12230.2	285	347	283	348	0.299771	Aldolase superfamily protein		PF00923	PTHR10683,PTHR10683:SF10	KOG2772	GO:0005975	LOC_Os08g05830.1	transaldolase, putative, expressed
AT1G12240.1	2202	1796	2190	1803	-0.28055	Glycosyl hydrolases family 32 protein	ATBETAFRUCT4	PF11837,PF08244,PF00251	PTHR31953,PTHR31953:SF17		GO:0004575,GO:0004564	LOC_Os02g01590.1	glycosyl hydrolases, putative, expressed
AT1G12244.1	91	97	90	97	0.113374	Polynucleotidyl transferase, ribonuclease H-like superfamily protein		PF03652	PTHR33317,PTHR33317:SF2		GO:0006310	LOC_Os10g40650.1	holliday junction resolvase, putative, expressed
AT1G12250.1	181	224	180	224	0.321857	Pentapeptide repeat-containing protein		PF00805	PTHR14136,PTHR14136:SF3			LOC_Os02g42960.1	thylakoid lumenal protein, putative, expressed
AT1G12260.1	25	27	25	27	0.124642	NAC 007	NAC007	PF02365	PTHR31989,PTHR31989:SF32		GO:0006355,GO:0003677	LOC_Os02g42970.1	NAC domain containing protein, putative, expressed
AT1G12270.1	509	588	506	590	0.221797	stress-inducible protein	Hop1	PF00515,PF13414	PTHR22904,PTHR22904:SF371		GO:0005515	LOC_Os02g43020.1	heat shock protein STI, putative, expressed
AT1G12280.1	74	81	74	81	0.1441	LRR and NB-ARC domains-containing disease resistance protein	SUMM2	PF13855,PF00931	PTHR23155,PTHR23155:SF639		GO:0005515,GO:0043531	LOC_Os01g57870.2	disease resistance protein RPS2, putative, expressed
AT1G12290.1	28	22	28	22	-0.334335	Disease resistance protein (CC-NBS-LRR class) family		PF13855,PF00931	PTHR23155,PTHR23155:SF639		GO:0005515,GO:0043531	LOC_Os01g57870.1	disease resistance protein RPS2, putative, expressed
AT1G12300.1	70	50	70	50	-0.48646	Tetratricopeptide repeat (TPR)-like superfamily protein		PF13812,PF13041	PTHR24015,PTHR24015:SF416			LOC_Os10g35240.1	Rf1, mitochondrial precursor, putative, expressed
AT1G12310.1	1081	1317	1075	1322	0.298986	Calcium-binding EF-hand family protein		PF13405,PF13499	PTHR23050,PTHR23050:SF214	KOG0027	GO:0005509	LOC_Os08g02420.1	OsCML7 - Calmodulin-related calcium sensor protein, expressed
AT1G12320.1	1163	1499	1157	1504	0.3791	ankyrin repeat/KH domain protein (DUF1442)		PF07279	PTHR33593,PTHR33593:SF2			LOC_Os02g25780.1	expressed protein
AT1G12330.1	982	964	976	967	-0.0132395	cyclin-dependent kinase-like protein			PTHR31029,PTHR31029:SF4			LOC_Os03g14500.1	expressed protein
AT1G12340.1	5	17	5	17	1.73713	Cornichon family protein		PF03311	PTHR12290,PTHR12290:SF18	KOG2729	GO:0035556,GO:0016020	LOC_Os06g04500.1	cornichon protein, putative, expressed
AT1G12350.1	86	78	85	78	-0.11872	4-phospho-panto-thenoylcysteine synthetase	COAB	PF04127	PTHR12290,PTHR12290:SF2	KOG2728		LOC_Os02g36550.1	phosphopantothenate--cysteine ligase, putative, expressed
AT1G12360.1	537	549	534	551	0.0467214	Sec1/munc18-like (SM) proteins superfamily	KEU	PF00995	PTHR11679,PTHR11679:SF38		GO:0016192,GO:0006904	LOC_Os02g25580.1	Sec1 family transport protein, putative, expressed
AT1G12370.2	111	96	110	96	-0.203607	photolyase 1	PHR1	PF03441,PF00875	PTHR10211,PTHR10211:SF0		GO:0006281,GO:0003904	LOC_Os10g08580.1	FAD binding domain of DNA photolyase domain containing protein, expressed
AT1G12380.1	1872	1432	1862	1438	-0.373108	hypothetical protein			PTHR32166,PTHR32166:SF15			LOC_Os02g25230.1	expressed protein
AT1G12390.1	141	159	140	160	0.18682	Cornichon family protein		PF03311	PTHR12290,PTHR12290:SF18	KOG2729	GO:0035556,GO:0016020	LOC_Os06g04500.1	cornichon protein, putative, expressed
AT1G12400.3	53	47	53	47	-0.175535	Nucleotide excision repair, TFIIH, subunit TTDA		PF06331	PTHR28580,PTHR28580:SF1	KOG3451	GO:0006355,GO:0006289,GO:0000439	LOC_Os07g38600.1	REX1 DNA Repair family protein, expressed
AT1G12410.1	908	841	903	844	-0.0971201	CLP protease proteolytic subunit 2	CLP2	PF00574	PTHR10381,PTHR10381:SF15	KOG0840		LOC_Os06g04530.1	OsClp9 - Putative Clp protease homologue, expressed
AT1G12420.1	140	135	139	135	-0.0442471	ACT domain repeat 8	ACR8	PF13740,PF01842	PTHR31096,PTHR31096:SF6		GO:0016597,GO:0008152	LOC_Os03g14370.2	ACT domain containing protein, expressed
AT1G12430.2	746	720	742	723	-0.037655	armadillo repeat kinesin 3	ARK3	PF00514,PF00225	PTHR24115,PTHR24115:SF437	KOG0240	GO:0005515,GO:0008017,GO:0007018,GO:0005524,GO:0003777,GO:0005871	LOC_Os06g04560.1	kinesin motor domain containing protein, expressed
AT1G12440.1	753	1060	749	1064	0.506104	A20/AN1-like zinc finger family protein		PF01428,PF01754	PTHR10634,PTHR10634:SF38	KOG3173	GO:0008270,GO:0003677	LOC_Os03g57890.3	zinc finger A20 and AN1 domain-containing stress-associated protein, putative, expressed
AT1G12450.1	141	192	140	193	0.458933	SNARE associated Golgi protein family		PF09335	PTHR12677,PTHR12677:SF19			LOC_Os07g28440.1	SNARE associated Golgi protein, putative, expressed
AT1G12460.1	697	619	693	621	-0.157761	Leucine-rich repeat protein kinase family protein		PF08263,PF07714	PTHR27000,PTHR27000:SF7	KOG1187	GO:0006468,GO:0004672	LOC_Os03g03570.2	leucine-rich repeat transmembrane protein kinase, putative, expressed
AT1G12470.1	494	423	491	425	-0.208903	zinc ion binding protein		PF00637,PF05131	PTHR23323,PTHR23323:SF26		GO:0016192,GO:0006886	LOC_Os08g08060.1	vacuolar protein sorting-associated protein 18, putative, expressed
AT1G12480.1	35	32	34	32	-0.118395	C4-dicarboxylate transporter/malic acid transport protein	OZS1	PF03595	PTHR31269,PTHR31269:SF11		GO:0055085,GO:0016021,GO:0008308,GO:0006873	LOC_Os04g48530.1	C4-dicarboxylate transporter/malic acid transport protein domain containing protein, expressed
AT1G12500.1	655	832	651	835	0.35963	Nucleotide-sugar transporter family protein		PF08449	PTHR11132,PTHR11132:SF65	KOG1441	GO:0055085	LOC_Os03g17740.1	transporter, putative, expressed
AT1G12520.1	277	488	275	490	0.832989	copper chaperone for SOD1	CCS	PF00403,PF00080	PTHR10003,PTHR10003:SF27	KOG4656	GO:0046872,GO:0030001,GO:0055114,GO:0006801,GO:0016532,GO:0005507	LOC_Os04g48410.1	copper chaperone for superoxide dismutase, putative, expressed
AT1G12530.1	133	110	132	110	-0.261539	hypothetical protein			PTHR34356,PTHR34356:SF1			LOC_Os03g12720.1	expressed protein
AT1G12550.1	266	286	265	287	0.115531	D-isomer specific 2-hydroxyacid dehydrogenase family protein	HPR3	PF00389,PF02826	PTHR10996,PTHR10996:SF131	KOG0069	GO:0055114,GO:0051287,GO:0016616,GO:0008152	LOC_Os04g01674.1	erythronate-4-phosphate dehydrogenase domain containing protein, expressed
AT1G12570.1	1374	1482	1366	1487	0.122645	Glucose-methanol-choline (GMC) oxidoreductase family protein		PF05199,PF00732	PTHR11552,PTHR11552:SF141		GO:0055114,GO:0016614,GO:0050660	LOC_Os04g48400.1	HOTHEAD precursor, putative, expressed
AT1G12580.1	228	442	227	443	0.966835	phosphoenolpyruvate carboxylase-related kinase 1	PEPKR1	PF00069	PTHR24349,PTHR24349:SF111	KOG0032	GO:0006468,GO:0005524,GO:0004672	LOC_Os06g03682.1	calcium-dependent protein kinase isoform AK1, putative, expressed
AT1G12600.1	22	17	22	17	-0.401748	UDP-N-acetylglucosamine (UAA) transporter family		PF08449	PTHR10778,PTHR10778:SF19	KOG1582	GO:0055085	LOC_Os03g02670.1	transporter family protein, putative, expressed
AT1G12610.1	16	10	16	10	-0.66461	Integrase-type DNA-binding superfamily protein	DDF1	PF00847	PTHR31839,PTHR31839:SF0		GO:0006355,GO:0003700	LOC_Os04g48350.1	dehydration-responsive element-binding protein, putative, expressed
AT1G12620.1	88	80	88	80	-0.12397	Pentatricopeptide repeat (PPR) superfamily protein		PF13041	PTHR24015,PTHR24015:SF416			LOC_Os10g35240.1	Rf1, mitochondrial precursor, putative, expressed
AT1G12640.1	451	361	449	362	-0.309753	MBOAT (membrane bound O-acyl transferase) family protein	LPLAT1	PF03062	PTHR13906,PTHR13906:SF4			LOC_Os02g45344.1	O-acyltransferase, putative, expressed
AT1G12650.1	176	166	175	166	-0.0710864	rRNA biogenesis RRP36-like protein		PF06102	PTHR21738,PTHR21738:SF0	KOG3190		LOC_Os09g35670.1	expressed protein
AT1G12660.1	4	3	4	3	-0.400648	thionin-like protein			PTHR36312,PTHR36312:SF1
AT1G12665.1	30	39	30	39	0.373408	thionin-like protein
AT1G12672.2	14	13	14	13	-0.148784	thionin-like protein			PTHR36312,PTHR36312:SF1
AT1G12680.1	234	279	233	280	0.264598	phosphoenolpyruvate carboxylase-related kinase 2	PEPKR2	PF14531	PTHR24349,PTHR24349:SF102	KOG0032		LOC_Os09g29170.1	CAMK_CAMK_like.38 - CAMK includes calcium/calmodulin depedent protein kinases, expressed
AT1G12700.2	43	33	43	33	-0.390175	RNA processing FACTOR	RPF1	PF13041	PTHR24015,PTHR24015:SF416			LOC_Os10g35240.1	Rf1, mitochondrial precursor, putative, expressed
AT1G12710.2	107	184	106	184	0.791713	phloem protein 2-A12	PP2-A12	PF14299	PTHR31960,PTHR31960:SF2			LOC_Os10g37830.1	OsFBX391 - F-box domain containing protein, expressed
AT1G12730.1	47	36	46	36	-0.37591	GPI transamidase subunit PIG-U		PF06728	PTHR13121	KOG2552	GO:0016021,GO:0006506	LOC_Os02g46350.1	GPI transamidase subunit PIG-U domain containing protein, expressed
AT1G12760.1	261	259	259	260	0.00230955	Zinc finger, C3HC4 type (RING finger) family protein		PF13639	PTHR14155,PTHR14155:SF186		GO:0008270,GO:0005515	LOC_Os02g45240.1	zinc finger family protein, putative, expressed
AT1G12770.1	8	11	7	11	0.499407	P-loop containing nucleoside triphosphate hydrolases superfamily protein	EMB1586	PF00271,PF00270	PTHR24031,PTHR24031:SF303	KOG0327	GO:0005524,GO:0003676	LOC_Os03g12000.1	DEAD-box ATP-dependent RNA helicase, putative, expressed
AT1G12775.1	41	44	40	44	0.133127	Pentatricopeptide repeat (PPR) superfamily protein		PF13812,PF13041	PTHR24015,PTHR24015:SF416			LOC_Os03g40020.1	PPR repeat containing protein, expressed
AT1G12780.1	1299	1224	1292	1228	-0.0729234	UDP-D-glucose/UDP-D-galactose 4-epimerase 1	UGE1	PF02719	PTHR10366,PTHR10366:SF331			LOC_Os09g35800.1	UDP-glucose 4-epimerase, putative, expressed
AT1G12790.1	30	28	29	28	-0.0614823	DNA ligase-like protein		PF12826	PTHR37394,PTHR37394:SF1			LOC_Os05g51060.1	DNA ligase, putative, expressed
AT1G12800.1	1783	1325	1773	1330	-0.414877	Nucleic acid-binding, OB-fold-like protein		PF00575	PTHR23270,PTHR23270:SF7		GO:0003676	LOC_Os02g02390.1	S1 RNA binding domain containing protein, expressed
AT1G12810.2	105	103	104	103	-0.00720119	proline-rich family protein
AT1G12820.1	661	542	657	544	-0.273135	auxin signaling F-box 3	AFB3		PTHR24006,PTHR24006:SF456	KOG1947		LOC_Os04g32460.1	OsFBL16 - F-box domain and LRR containing protein, expressed
AT1G12830.1	192	255	191	256	0.420155	nucleolin			PTHR15336,PTHR15336:SF1		GO:0008121,GO:0006122	LOC_Os04g32470.1	expressed protein
AT1G12840.1	1697	1815	1687	1822	0.110469	vacuolar ATP synthase subunit C (VATC) / V-ATPase C subunit / vacuolar proton pump C subunit (DET3)	DET3	PF03223	PTHR10137		GO:0033180,GO:0015991,GO:0015078	LOC_Os05g51530.2	vacuolar ATP synthase subunit C, putative, expressed
AT1G12845.1	80	108	79	108	0.448722	transmembrane protein
AT1G12850.1	534	640	531	643	0.27603	Phosphoglycerate mutase family protein		PF00300	PTHR23029,PTHR23029:SF39	KOG0234		LOC_Os11g31880.1	phosphoglycerate mutase, putative, expressed
AT1G12860.1	37	49	37	49	0.418054	basic helix-loop-helix (bHLH) DNA-binding superfamily protein	SCRM2	PF00010	PTHR31945,PTHR31945:SF13		GO:0046983	LOC_Os11g32100.1	inducer of CBF expression 1, putative, expressed
AT1G12880.1	120	128	119	128	0.106911	nudix hydrolase homolog 12	NUDT12	PF00293	PTHR12629,PTHR12629:SF11	KOG2839	GO:0016787	LOC_Os02g32060.2	hydrolase, NUDIX family, domain containing protein, expressed
AT1G12890.1	8	9	8	9	0.183387	Integrase-type DNA-binding superfamily protein		PF00847	PTHR31677		GO:0006355,GO:0003700	LOC_Os02g32040.1	AP2 domain containing protein, expressed
AT1G12900.5	6106	5809	6073	5831	-0.0586203	glyceraldehyde 3-phosphate dehydrogenase A subunit 2	GAPA-2	PF00044,PF02800	PTHR10836,PTHR10836:SF38	KOG0657	GO:0055114,GO:0016620	LOC_Os04g38600.3	glyceraldehyde-3-phosphate dehydrogenase, putative, expressed
AT1G12910.1	336	336	334	337	0.0135102	Transducin/WD40 repeat-like superfamily protein	ATAN11		PTHR19919			LOC_Os02g32430.1	WD domain, G-beta repeat domain containing protein, expressed
AT1G12920.1	749	788	744	791	0.0876653	eukaryotic release factor 1-2	ERF1-2	PF03463,PF03465,PF03464	PTHR10113,PTHR10113:SF8		GO:0016149,GO:0006415,GO:0005737	LOC_Os03g49580.1	eukaryotic peptide chain release factor subunit 1-1, putative, expressed
AT1G12930.1	340	246	338	246	-0.454277	ARM repeat superfamily protein		PF08389	PTHR12363,PTHR12363:SF27	KOG2081		LOC_Os11g34120.1	exportin 1, putative, expressed
AT1G12940.1	18	10	17	10	-0.793998	nitrate transporter2.5	NRT2.5	PF07690	PTHR23515,PTHR23515:SF3	KOG2533	GO:0055085,GO:0016021	LOC_Os01g50820.1	transporter, major facilitator family, putative, expressed
AT1G12950.1	13	23	13	23	0.805002	root hair specific 2	RSH2	PF01554	PTHR11206,PTHR11206:SF79	KOG1347	GO:0055085,GO:0016020,GO:0015297,GO:0015238,GO:0006855	LOC_Os08g43654.1	MATE efflux family protein, putative, expressed
AT1G12970.1	116	127	115	127	0.150389	plant intracellular ras group-related LRR 3	PIRL3	PF13855	PTHR23155,PTHR23155:SF516	KOG0617	GO:0005515	LOC_Os04g40080.1	leucine rich repeat containing protein, expressed
AT1G12980.1	5	5	5	5	-0.139173	Integrase-type DNA-binding superfamily protein	ESR1	PF00847	PTHR31677,PTHR31677:SF17		GO:0006355,GO:0003700	LOC_Os04g32790.1	AP2 domain containing protein, expressed
AT1G12990.1	379	466	377	468	0.311533	beta-1,4-N-acetylglucosaminyltransferase family protein		PF04724	PTHR12224,PTHR12224:SF1		GO:0016020,GO:0006487,GO:0003830	LOC_Os04g40150.1	glycosyl transferase family 17 protein, putative, expressed
AT1G13000.1	4	10	3	10	1.4544	transmembrane protein, putative (DUF707)		PF05212	PTHR31210,PTHR31210:SF7			LOC_Os01g68260.1	lysine ketoglutarate reductase trans-splicing related 1, putative, expressed
AT1G13020.1	620	526	617	528	-0.225131	eukaryotic initiation factor 4B2	EIF4B2	PF06273	PTHR32091,PTHR32091:SF0			LOC_Os02g38220.1	eukaryotic translation initiation factor 4B, putative, expressed
AT1G13030.1	128	105	127	105	-0.266606	sphere organelles protein-like protein		PF15862	PTHR15197,PTHR15197:SF0			LOC_Os12g19040.1	expressed protein
AT1G13040.1	26	37	25	37	0.530566	Pentatricopeptide repeat (PPR-like) superfamily protein		PF01535,PF13041	PTHR24015,PTHR24015:SF513			LOC_Os07g48850.2	PPR repeat containing protein, expressed
AT1G13050.1	40	38	40	38	-0.0602388	proline-rich receptor-like kinase			PTHR31852,PTHR31852:SF49			LOC_Os01g68090.1	harpin-induced protein 1 domain containing protein, expressed
AT1G13060.2	251	253	249	254	0.0277651	20S proteasome beta subunit E1	PBE1	PF00227	PTHR11599,PTHR11599:SF63	KOG0175	GO:0051603,GO:0005839,GO:0004298	LOC_Os06g06030.1	peptidase, T1 family, putative, expressed
AT1G13080.1	123	50	122	50	-1.2852	cytochrome P450, family 71, subfamily B, polypeptide 2	CYP71B2	PF00067	PTHR24298,PTHR24298:SF144		GO:0055114,GO:0020037,GO:0016705,GO:0005506	LOC_Os12g32850.1	cytochrome P450, putative, expressed
AT1G13090.2	470	346	467	347	-0.430431	cytochrome P450, family 71, subfamily B, polypeptide 28	CYP71B28	PF00067	PTHR24298,PTHR24298:SF144		GO:0055114,GO:0020037,GO:0016705,GO:0005506	LOC_Os12g32850.1	cytochrome P450, putative, expressed
AT1G13110.1	5	7	4	7	0.65048	cytochrome P450, family 71 subfamily B, polypeptide 7	CYP71B7	PF00067	PTHR24298,PTHR24298:SF144		GO:0055114,GO:0020037,GO:0016705,GO:0005506	LOC_Os12g32850.1	cytochrome P450, putative, expressed
AT1G13120.1	188	168	187	169	-0.148857	nucleoporin GLE1-like protein	GLE1	PF07817	PTHR12960,PTHR12960:SF0		GO:0016973,GO:0005643	LOC_Os02g38250.1	EMB1745, putative, expressed
AT1G13130.1	72	75	72	75	0.0723831	Cellulase (glycosyl hydrolase family 5) protein		PF00652,PF00150	PTHR31263,PTHR31263:SF0		GO:0005975,GO:0004553	LOC_Os04g40510.1	glycosyl hydrolase family 5 protein, putative, expressed
AT1G13140.1	16	19	15	19	0.268754	cytochrome P450, family 86, subfamily C, polypeptide 3	CYP86C3	PF00067	PTHR24296,PTHR24296:SF2	KOG0157	GO:0055114,GO:0020037,GO:0016705,GO:0005506	LOC_Os02g38290.2	cytochrome P450, putative, expressed
AT1G13143.1	5	4	5	4	-0.309207	hypothetical protein
AT1G13150.1	17	27	17	27	0.680887	cytochrome P450, family 86, subfamily C, polypeptide 4	CYP86C4	PF00067	PTHR24296,PTHR24296:SF2	KOG0157	GO:0055114,GO:0020037,GO:0016705,GO:0005506	LOC_Os02g38290.1	cytochrome P450, putative, expressed
AT1G13160.1	284	260	282	261	-0.114117	ARM repeat superfamily protein		PF08158,PF05285	PTHR12730,PTHR12730:SF0		GO:0042273,GO:0030036,GO:0000055	LOC_Os04g53770.1	SDA1, putative, expressed
AT1G13170.2	275	231	273	232	-0.235122	OSBP(oxysterol binding protein)-related protein 1D	ORP1D	PF00169,PF01237	PTHR10972,PTHR10972:SF67			LOC_Os12g18770.1	oxysterol-binding protein, putative, expressed
AT1G13180.1	138	153	137	154	0.162262	Actin-like ATPase superfamily protein	DIS1	PF00022	PTHR11937,PTHR11937:SF31		GO:0034314,GO:0007015,GO:0005885,GO:0005524	LOC_Os02g38340.1	actin, putative, expressed
AT1G13190.1	399	523	396	525	0.405669	RNA-binding (RRM/RBD/RNP motifs) family protein		PF00076	PTHR24012,PTHR24012:SF425		GO:0003676	LOC_Os08g38240.1	transposon protein, putative, CACTA, En/Spm sub-class, expressed
AT1G13195.1	47	51	46	51	0.132419	RING/U-box superfamily protein		PF13920	PTHR15315,PTHR15315:SF35	KOG1039		LOC_Os07g17400.2	zinc finger, RING-type, putative, expressed
AT1G13210.1	90	143	90	144	0.681481	autoinhibited Ca2+/ATPase II	ACA.l	PF12710,PF16209,PF16212	PTHR24092,PTHR24092:SF41		GO:0016021,GO:0015914,GO:0005524,GO:0004012,GO:0000287	LOC_Os06g29380.1	phospholipid-transporting ATPase, putative, expressed
AT1G13220.3	92	67	91	67	-0.446847	nuclear matrix constituent protein-like protein	LINC2		PTHR31908,PTHR31908:SF4	KOG4593,KOG0978		LOC_Os02g48010.1	nuclear matrix constituent protein 1-like, putative, expressed
AT1G13230.1	13	10	13	10	-0.439349	Leucine-rich repeat (LRR) family protein		PF00560,PF13855	PTHR27000,PTHR27000:SF18	KOG4579,KOG0617	GO:0005515	LOC_Os01g02060.1	TOO MANY MOUTHS precursor, putative, expressed
AT1G13245.1	16	14	16	14	-0.231861	ROTUNDIFOLIA like 17	RTFL17	PF08137	PTHR33102,PTHR33102:SF10			LOC_Os05g08620.1	expressed protein
AT1G13250.1	419	288	416	289	-0.52833	galacturonosyltransferase-like 3	GATL3	PF01501	PTHR13778,PTHR13778:SF4		GO:0016757	LOC_Os03g24510.1	glycosyl transferase 8 domain containing protein, putative, expressed
AT1G13260.1	92	116	91	116	0.355992	related to ABI3/VP1 1	RAV1	PF00847,PF02362	PTHR31140,PTHR31140:SF3		GO:0006355,GO:0003700,GO:0003677	LOC_Os01g49830.1	B3 DNA binding domain containing protein, expressed
AT1G13270.1	139	123	138	124	-0.157647	methionine aminopeptidase 1B	MAP1C	PF00557	PTHR10804,PTHR10804:SF68			LOC_Os04g52100.1	peptidase, M24 family protein, putative, expressed
AT1G13280.1	1393	1295	1386	1300	-0.0918565	allene oxide cyclase 4	AOC4	PF06351	PTHR31843,PTHR31843:SF2		GO:0016853,GO:0009507	LOC_Os03g32314.1	allene oxide cyclase 4, chloroplast precursor, putative, expressed
AT1G13320.1	107	123	106	123	0.208227	protein phosphatase 2A subunit A3	PP2AA3	PF12755,PF13646	PTHR10648,PTHR10648:SF11			LOC_Os09g07510.1	HEAT repeat family protein, putative, expressed
AT1G13330.1	44	36	44	36	-0.276213	Tat-binding protein 1(Tbp-1)-interacting protein (TBPIP)	AHP2	PF07106	PTHR15938	KOG4603		LOC_Os03g50220.1	homologous-pairing protein meu13, putative, expressed
AT1G13340.1	67	46	66	46	-0.518107	Regulator of Vps4 activity in the MVB pathway protein		PF03398	PTHR12161,PTHR12161:SF23	KOG2027		LOC_Os03g50210.1	DUF292 domain containing protein, expressed
AT1G13350.3	35	35	35	35	-0.00823797	Protein kinase superfamily protein		PF07714	PTHR24056,PTHR24056:SF45		GO:0006468,GO:0004672	LOC_Os12g44330.1	serine/threonine-protein kinase PRP4, putative, expressed
AT1G13360.1	372	240	370	240	-0.62186	hypothetical protein			PTHR34539,PTHR34539:SF1			LOC_Os01g04010.1	expressed protein
AT1G13370.1	6	6	6	6	0.0134623	Histone superfamily protein		PF00125	PTHR11426	KOG1745	GO:0003677,GO:0000786	LOC_Os03g27310.2	histone H3, putative, expressed
AT1G13380.1	239	339	237	340	0.518626	sodium/hydrogen exchanger (DUF1218)		PF06749	PTHR31769,PTHR31769:SF5			LOC_Os09g10910.2	fiber protein Fb34, putative, expressed
AT1G13390.1	270	425	269	426	0.666233	translocase subunit seca			PTHR33384,PTHR33384:SF1
AT1G13410.1	11	17	11	17	0.640822	Tetratricopeptide repeat (TPR)-like superfamily protein		PF13041,PF01535	PTHR24015,PTHR24015:SF469			LOC_Os12g38880.1	tetratricopeptide-like helical, putative, expressed
AT1G13420.1	11	6	11	6	-0.861007	sulfotransferase 4B	ST4B	PF13469	PTHR11783,PTHR11783:SF74	KOG1584		LOC_Os04g44460.1	sulfotransferase domain containing protein, expressed
AT1G13440.1	6517	6329	6482	6353	-0.0289173	glyceraldehyde-3-phosphate dehydrogenase C2	GAPC2	PF00044,PF02800	PTHR10836,PTHR10836:SF53	KOG0657	GO:0055114,GO:0016620	LOC_Os04g40950.1	glyceraldehyde-3-phosphate dehydrogenase, putative, expressed
AT1G13450.1	108	106	107	106	-0.0203382	Homeodomain-like superfamily protein	GT-1	PF13837	PTHR10032,PTHR10032:SF222	KOG4282	GO:0006351,GO:0005634,GO:0003700	LOC_Os04g40930.1	MYB family transcription factor, putative, expressed
AT1G13460.1	5	3	4	3	-0.832985	Protein phosphatase 2A regulatory B subunit family protein		PF01603	PTHR10257,PTHR10257:SF26		GO:0008601,GO:0007165,GO:0000159	LOC_Os04g40860.1	transposon protein, putative, unclassified, expressed
AT1G13470.1	7	1	7	1	-2.79389	hypothetical protein (DUF1262)		PF06880	PTHR31050,PTHR31050:SF2			LOC_Os08g31880.1	expressed protein
AT1G13560.1	234	211	233	211	-0.139226	aminoalcoholphosphotransferase 1	AAPT1	PF01066	PTHR10414,PTHR10414:SF46	KOG2877	GO:0016780,GO:0016020,GO:0008654	LOC_Os06g10280.1	CDP-alcohol phosphatidyltransferase, putative, expressed
AT1G13570.1	185	181	184	182	-0.0143448	F-box/RNI-like superfamily protein		PF08387,PF07723,PF00646	PTHR32212,PTHR32212:SF132		GO:0005515	LOC_Os02g33400.1	OsFBL9 - F-box domain and LRR containing protein, expressed
AT1G13580.2	102	101	101	101	-0.0081661	LAG1 longevity assurance-like protein	LAG13	PF03798	PTHR12560,PTHR12560:SF13	KOG1607	GO:0016021,GO:0005783	LOC_Os02g37080.1	ASC1, putative, expressed
AT1G13590.1	3	6	3	6	1.01223	phytosulfokine 1 precursor	PSK1	PF06404	PTHR33285		GO:0008283,GO:0008083,GO:0005576	LOC_Os03g12990.1	phytosulfokines precursor, putative, expressed
AT1G13605.1	573	634	569	636	0.159559	defensin-like protein
AT1G13607.1	7	1	6	1	-2.68669	Defensin-like (DEFL) family protein
AT1G13609.1	183	188	182	188	0.0524211	Defensin-like (DEFL) family protein
AT1G13630.4	19	21	18	21	0.161044	Tetratricopeptide repeat (TPR)-like superfamily protein		PF01535,PF13041	PTHR24015,PTHR24015:SF309			LOC_Os10g33874.1	PPR repeat domain containing protein, putative, expressed
AT1G13635.1	136	136	135	137	0.0134769	DNA glycosylase superfamily protein		PF03352	PTHR31116,PTHR31116:SF2		GO:0008725,GO:0006284	LOC_Os08g38170.1	methyladenine glycosylase, putative, expressed
AT1G13640.1	388	345	386	346	-0.155975	Phosphatidylinositol 3- and 4-kinase family protein		PF00454	PTHR15245,PTHR15245:SF11	KOG2381	GO:0016773	LOC_Os06g17290.1	phosphatidylinositol 3- and 4-kinase family protein, putative, expressed
AT1G13650.1	517	391	514	392	-0.389914	hypothetical protein			PTHR33914			LOC_Os04g39240.1	expressed protein
AT1G13670.1	24	28	24	28	0.236009	hypothetical protein			PTHR33541
AT1G13680.1	118	116	117	116	-0.0112978	PLC-like phosphodiesterases superfamily protein			PTHR13593,PTHR13593:SF46			LOC_Os03g30130.1	phospholipase C, putative, expressed
AT1G13690.1	194	225	192	225	0.227905	ATPase E1	ATE1	PF00076	PTHR11071,PTHR11071:SF274	KOG4208,KOG0126	GO:0003676,GO:0006457,GO:0003755	LOC_Os03g40310.1	RNA recognition motif containing protein, putative, expressed
AT1G13700.1	89	148	89	149	0.747105	6-phosphogluconolactonase 1	PGL1	PF01182	PTHR11054,PTHR11054:SF2	KOG3147	GO:0005975	LOC_Os07g41280.3	6-phosphogluconolactonase, putative, expressed
AT1G13710.1	194	136	192	136	-0.500487	cytochrome P450, family 78, subfamily A, polypeptide 5	CYP78A5	PF00067	PTHR24298,PTHR24298:SF112	KOG0156	GO:0055114,GO:0020037,GO:0016705,GO:0005506	LOC_Os03g30420.1	cytochrome P450, putative, expressed
AT1G13730.1	122	134	121	135	0.154725	Nuclear transport factor 2 (NTF2) family protein with RNA binding (RRM-RBD-RNP motifs) domain-containing protein		PF00076,PF02136	PTHR10693,PTHR10693:SF27	KOG0116	GO:0003676,GO:0006810,GO:0005622	LOC_Os04g30430.1	nuclear transport factor 2, putative, expressed
AT1G13740.1	119	156	118	157	0.404047	ABI five binding protein 2	AFP2	PF16135,PF07897,PF16136	PTHR31413,PTHR31413:SF4		GO:0007165	LOC_Os07g41160.1	protein of unknown function DUF1675 domain containing protein, expressed
AT1G13750.1	11	11	11	11	-0.0542597	Purple acid phosphatases superfamily protein		PF16656,PF14008,PF00149	PTHR22953,PTHR22953:SF20	KOG1378	GO:0016787	LOC_Os12g38760.2	nucleotide pyrophosphatase/phosphodiesterase, putative, expressed
AT1G13755.1	63	57	62	57	-0.11958	Defensin-like (DEFL) family protein
AT1G13770.1	59	56	58	56	-0.0496305	root UVB sensitive protein (Protein of unknown function, DUF647)	RUS3	PF04884	PTHR12770,PTHR12770:SF22	KOG4249		LOC_Os03g11500.1	DUF647 domain containing protein, putative, expressed
AT1G13780.1	72	47	72	47	-0.601892	F-box/RNI-like/FBD-like domains-containing protein		PF07723,PF00646,PF08387	PTHR32212,PTHR32212:SF126		GO:0005515	LOC_Os10g03780.1	OsFBX351 - F-box domain containing protein, expressed
AT1G13790.1	49	63	48	63	0.391201	XH/XS domain-containing protein	FDM4	PF03470,PF03468,PF03469	PTHR21596,PTHR21596:SF3		GO:0031047	LOC_Os02g19130.1	transcription factor X1, putative, expressed
AT1G13800.1	20	22	19	22	0.187655	Tetratricopeptide repeat (TPR)-like superfamily protein	FAC19	PF01535,PF13041	PTHR24015,PTHR24015:SF309			LOC_Os02g43080.1	PPR repeat domain containing protein, putative, expressed
AT1G13810.1	45	49	45	49	0.121581	Restriction endonuclease, type II-like superfamily protein		PF09588				LOC_Os04g40900.1	exonuclease, putative, expressed
AT1G13820.1	332	312	330	313	-0.078505	alpha/beta-Hydrolases superfamily protein		PF12697	PTHR10992,PTHR10992:SF801	KOG1454		LOC_Os07g41080.1	hydrolase, alpha/beta fold family domain containing protein, expressed
AT1G13830.2	94	63	93	63	-0.567713	Carbohydrate-binding X8 domain superfamily protein		PF07983	PTHR32227,PTHR32227:SF56			LOC_Os03g54910.1	X8 domain containing protein, expressed
AT1G13860.1	224	179	222	180	-0.306878	QUASIMODO2 LIKE 1	QUL1	PF03141	PTHR10108,PTHR10108:SF817		GO:0008168	LOC_Os02g51860.1	dehydration response related protein, putative, expressed
AT1G13870.1	152	149	151	150	-0.0153836	KTI12-like, chromatin associated protein	DRL1	PF13671	PTHR12435,PTHR12435:SF2	KOG3062
AT1G13880.2	216	281	214	282	0.396278	ELM2 domain-containing protein			PTHR22970,PTHR22970:SF28			LOC_Os03g31230.1	MYB family transcription factor, putative, expressed
AT1G13900.1	513	437	510	439	-0.21786	Purple acid phosphatases superfamily protein	PAP2	PF16656,PF00149,PF14008	PTHR22953,PTHR22953:SF46	KOG1378	GO:0016787	LOC_Os07g02090.1	Ser/Thr protein phosphatase family protein, putative, expressed
AT1G13910.1	56	39	55	39	-0.513859	Leucine-rich repeat (LRR) family protein		PF00560,PF13855	PTHR27000,PTHR27000:SF120	KOG0617	GO:0005515	LOC_Os03g11340.1	leucine-rich repeat resistance protein, putative, expressed
AT1G13930.1	1795	1499	1785	1505	-0.246497	oleosin-B3-like protein			PTHR35098,PTHR35098:SF1			LOC_Os10g18340.1	expressed protein
AT1G13940.1	10	5	9	5	-0.910068	T-box transcription factor, putative (DUF863)		PF05904	PTHR33167,PTHR33167:SF3			LOC_Os12g38870.1	expressed protein
AT1G13950.1	79	113	78	113	0.539192	eukaryotic elongation factor 5A-1	ELF5A-1	PF01287	PTHR11673,PTHR11673:SF8	KOG3271	GO:0045905,GO:0045901,GO:0043022,GO:0006452,GO:0003746,GO:0003723	LOC_Os12g32240.1	eukaryotic translation initiation factor 5A, putative, expressed
AT1G13960.1	21	39	20	39	0.941333	WRKY DNA-binding protein 4	WRKY4	PF03106	PTHR31221,PTHR31221:SF22		GO:0043565,GO:0006355,GO:0003700	LOC_Os12g32250.1	WRKY96, expressed
AT1G13970.1	117	140	116	140	0.273579	beta-hexosaminidase (DUF1336)		PF07059	PTHR31558,PTHR31558:SF1			LOC_Os12g38850.2	DUF1336 domain containing protein, expressed
AT1G13980.1	743	606	739	608	-0.280577	sec7 domain-containing protein	GN	PF12783,PF01369	PTHR10663,PTHR10663:SF155		GO:0032012,GO:0005086	LOC_Os03g46330.1	pattern formation protein EMB30, putative, expressed
AT1G13990.3	61	58	60	58	-0.059991	plant/protein			PTHR37178,PTHR37178:SF1			LOC_Os03g07190.1	expressed protein
AT1G14000.1	477	495	474	496	0.066951	VH1-interacting kinase	VIK	PF12796,PF07714	PTHR23257,PTHR23257:SF366	KOG0192	GO:0006468,GO:0004672	LOC_Os07g43900.1	protein kinase domain containing protein, expressed
AT1G14010.1	399	545	397	547	0.463247	emp24/gp25L/p24 family/GOLD family protein		PF01105	PTHR22811,PTHR22811:SF47	KOG1691	GO:0016021,GO:0006810	LOC_Os07g43890.1	emp24/gp25L/p24 family protein, putative, expressed
AT1G14020.1	207	171	206	172	-0.262244	O-fucosyltransferase family protein		PF10250	PTHR31741,PTHR31741:SF3			LOC_Os06g17390.1	auxin-independent growth promoter protein, putative, expressed
AT1G14030.1	363	334	361	335	-0.108883	Rubisco methyltransferase family protein	LSMT-L	PF00856,PF09273	PTHR13271,PTHR13271:SF29	KOG1337	GO:0005515	LOC_Os09g24530.1	ribulose-1,5 bisphosphate carboxylase/oxygenase large subunit N-methyltransferase, chloroplast precursor, putative, expressed
AT1G14040.1	175	160	174	160	-0.120248	EXS (ERD1/XPR1/SYG1) family protein		PF03105,PF03124	PTHR10783,PTHR10783:SF43		GO:0016021	LOC_Os01g02000.1	phosphate transporter 1, putative, expressed
AT1G14060.1	78	136	78	136	0.810194	GCK domain-containing protein		PF07802	PTHR34357,PTHR34357:SF2			LOC_Os03g44520.1	expressed protein
AT1G14080.1	65	56	64	56	-0.203314	fucosyltransferase 6	FUT6	PF03254	PTHR31889,PTHR31889:SF2		GO:0042546,GO:0016020,GO:0008107	LOC_Os02g52630.1	xyloglucan fucosyltransferase, putative, expressed
AT1G14130.1	107	94	106	94	-0.174331	2-oxoglutarate (2OG) and Fe(II)-dependent oxygenase superfamily protein		PF14226,PF03171	PTHR10209,PTHR10209:SF108	KOG0143	GO:0055114,GO:0016491	LOC_Os04g39980.1	gibberellin 20 oxidase 2, putative, expressed
AT1G14140.1	131	150	130	150	0.209553	Mitochondrial substrate carrier family protein	UCP3	PF00153	PTHR24089,PTHR24089:SF347	KOG0753		LOC_Os04g37630.1	mitochondrial carrier protein, putative, expressed
AT1G14150.1	327	263	325	264	-0.301319	PsbQ-like 2	PnsL2	PF05757	PTHR33399,PTHR33399:SF5		GO:0019898,GO:0015979,GO:0009654,GO:0009523,GO:0005509	LOC_Os02g36850.1	oxygen evolving enhancer protein 3, identical, putative, expressed
AT1G14160.1	61	60	61	60	-0.0100125	Uncharacterized protein family (UPF0497)		PF04535	PTHR11615,PTHR11615:SF81			LOC_Os06g12500.1	membrane associated DUF588 domain containing protein, putative, expressed
AT1G14170.3	73	62	73	62	-0.222318	RNA-binding KH domain-containing protein		PF00013	PTHR10288,PTHR10288:SF149	KOG2190	GO:0003723	LOC_Os03g25970.2	KH domain-containing protein, putative, expressed
AT1G14180.1	113	139	112	140	0.312372	RING/U-box superfamily protein			PTHR31150,PTHR31150:SF7			LOC_Os10g26610.2	mandelonitrile lyase, putative, expressed
AT1G14185.1	8	11	8	11	0.473357	Glucose-methanol-choline (GMC) oxidoreductase family protein		PF05199,PF00732	PTHR11552,PTHR11552:SF140		GO:0055114,GO:0016614,GO:0050660	LOC_Os04g48400.1	HOTHEAD precursor, putative, expressed
AT1G14190.2	75	48	74	48	-0.635646	Glucose-methanol-choline (GMC) oxidoreductase family protein		PF05199,PF00732	PTHR11552,PTHR11552:SF140		GO:0055114,GO:0016614,GO:0050660	LOC_Os04g48400.1	HOTHEAD precursor, putative, expressed
AT1G14200.1	489	236	486	236	-1.04061	RING/U-box superfamily protein		PF13639	PTHR22763,PTHR22763:SF77		GO:0008270,GO:0005515	LOC_Os07g43740.1	zinc finger, C3HC4 type domain containing protein, expressed
AT1G14205.1	6	22	6	22	1.85499	Ribosomal L18p/L5e family protein		PF00861	PTHR12899,PTHR12899:SF8		GO:0006412,GO:0005840,GO:0005622,GO:0003735	LOC_Os03g07340.1	ribosomal L18p/L5e family protein, putative, expressed
AT1G14210.1	76	129	76	130	0.776762	Ribonuclease T2 family protein		PF00445	PTHR11240,PTHR11240:SF19	KOG1642	GO:0033897,GO:0003723	LOC_Os08g33710.1	ribonuclease T2 family domain containing protein, expressed
AT1G14230.1	235	202	234	202	-0.208477	GDA1/CD39 nucleoside phosphatase family protein		PF01150	PTHR11782,PTHR11782:SF42	KOG1386	GO:0016787	LOC_Os08g33850.1	nucleoside-triphosphatase, putative, expressed
AT1G14250.1	8	20	8	20	1.29843	GDA1/CD39 nucleoside phosphatase family protein		PF01150	PTHR11782,PTHR11782:SF42		GO:0016787	LOC_Os08g33850.1	nucleoside-triphosphatase, putative, expressed
AT1G14260.1	13	14	12	14	0.123838	RING/FYVE/PHD zinc finger superfamily protein		PF12906,PF12428	PTHR23012,PTHR23012:SF57		GO:0008270	LOC_Os02g36740.1	zinc finger, C3HC4 type, putative, expressed
AT1G14270.1	501	489	498	490	-0.0230273	CAAX amino terminal protease family protein		PF02517	PTHR10794,PTHR10794:SF53		GO:0016020	LOC_Os09g24670.1	CAAX amino terminal protease family protein, putative, expressed
AT1G14280.1	652	694	648	696	0.103611	phytochrome kinase substrate 2	PKS2		PTHR33781,PTHR33781:SF4
AT1G14290.1	388	590	386	592	0.616902	sphingoid base hydroxylase 2	SBH2	PF04116	PTHR11863,PTHR11863:SF52	KOG0874	GO:0055114,GO:0016491,GO:0006633,GO:0005506	LOC_Os06g12250.1	sphingolipid C4-hydroxylase SUR2, putative, expressed
AT1G14300.2	101	115	100	115	0.200803	ARM repeat superfamily protein		PF04064,PF04063	PTHR13387	KOG2973		LOC_Os10g26660.1	expressed protein
AT1G14310.1	106	124	105	124	0.233897	Haloacid dehalogenase-like hydrolase (HAD) superfamily protein		PF13419	PTHR12725,PTHR12725:SF55	KOG3085		LOC_Os08g07300.1	haloacid dehalogenase-like hydrolase domain-containing protein 3, putative, expressed
AT1G14320.1	4929	5542	4902	5563	0.18256	Ribosomal protein L16p/L10e family protein	SAC52	PF00252	PTHR11726,PTHR11726:SF15	KOG0857	GO:0006412,GO:0005840,GO:0003735	LOC_Os11g11390.1	ribosomal protein, putative, expressed
AT1G14330.1	200	242	198	243	0.292001	Galactose oxidase/kelch repeat superfamily protein		PF01344	PTHR24413,PTHR24413:SF138		GO:0005515	LOC_Os03g07530.1	OsFBK12 - F-box domain and kelch repeat containing protein, expressed
AT1G14340.1	97	62	96	62	-0.624986	RNA-binding (RRM/RBD/RNP motifs) family protein		PF00076			GO:0003676	LOC_Os04g54870.1	RNA recognition motif containing protein, putative, expressed
AT1G14345.1	978	849	973	852	-0.19142	NAD(P)-linked oxidoreductase superfamily protein		PF03703	PTHR35688,PTHR35688:SF2			LOC_Os03g07440.1	putativ eribonuclease P, putative, expressed
AT1G14350.1	91	68	90	68	-0.410136	Duplicated homeodomain-like superfamily protein	FLP	PF13921	PTHR10641,PTHR10641:SF461	KOG0048		LOC_Os07g43420.1	MYB family transcription factor, putative, expressed
AT1G14360.1	415	396	413	397	-0.0560162	UDP-galactose transporter 3	UTR3	PF08449	PTHR10778,PTHR10778:SF10	KOG1581	GO:0055085	LOC_Os06g39260.1	solute carrier family 35 member B1, putative, expressed
AT1G14370.1	36	45	36	45	0.334955	protein kinase 2A	APK2A	PF07714	PTHR27001,PTHR27001:SF160	KOG1187	GO:0006468,GO:0004672	LOC_Os03g07430.1	protein kinase domain containing protein, expressed
AT1G14380.1	152	196	151	196	0.381398	IQ-domain 28	IQD28	PF00612,PF13178	PTHR32295,PTHR32295:SF14		GO:0005515	LOC_Os05g45930.1	IQ calmodulin-binding motif family protein, putative, expressed
AT1G14390.1	57	49	56	49	-0.191974	Leucine-rich repeat protein kinase family protein		PF00560,PF13855,PF07714	PTHR27003,PTHR27003:SF43	KOG1187	GO:0005515,GO:0006468,GO:0004672	LOC_Os06g38970.1	expressed protein
AT1G14400.1	861	930	856	933	0.124809	ubiquitin carrier protein 1	UBC1	PF00179	PTHR24067,PTHR24067:SF120	KOG0419		LOC_Os07g07240.2	ubiquitin-conjugating enzyme, putative, expressed
AT1G14410.1	275	225	274	225	-0.279253	ssDNA-binding transcriptional regulator	WHY1	PF08536	PTHR31745,PTHR31745:SF2			LOC_Os06g05350.1	whirly transcription factor domain containing protein, expressed
AT1G14420.1	207	204	206	205	-0.0076351	Pectate lyase family protein	AT59	PF04431,PF00544	PTHR31683,PTHR31683:SF7		GO:0030570	LOC_Os02g12300.1	pectate lyase precursor, putative, expressed
AT1G14430.1	690	606	686	608	-0.175086	glyoxal oxidase-related protein		PF09118,PF07250	PTHR32208,PTHR32208:SF19			LOC_Os03g15320.1	glyoxal oxidase-related, putative, expressed
AT1G14440.1	40	67	39	67	0.764952	homeobox protein 31	HB31	PF04770	PTHR31948,PTHR31948:SF19			LOC_Os11g13930.1	ZF-HD protein dimerisation region containing protein, expressed
AT1G14450.2	461	586	459	588	0.35958	NADH dehydrogenase (ubiquinone)s		PF08122	PTHR15082,PTHR15082:SF2		GO:0022900,GO:0005747,GO:0005739	LOC_Os02g35610.1	expressed protein
AT1G14453.1	559	709	556	711	0.356648	hypothetical protein
AT1G14455.1	711	877	707	880	0.316312	hypothetical protein
AT1G14460.1	360	328	358	329	-0.118787	AAA-type ATPase family protein		PF12169,PF00004	PTHR11669,PTHR11669:SF0	KOG0989	GO:0003887,GO:0005524	LOC_Os12g10670.1	AAA-type ATPase family protein, putative, expressed
AT1G14470.1	13	5	13	5	-1.36505	Pentatricopeptide repeat (PPR) superfamily protein		PF01535,PF13041	PTHR24015,PTHR24015:SF911			LOC_Os03g56400.1	pentatricopeptide, putative, expressed
AT1G14480.1	90	93	90	93	0.0607069	Ankyrin repeat family protein		PF13962,PF00023,PF12796	PTHR24128,PTHR24128:SF24		GO:0005515	LOC_Os07g09530.1	ankyrin repeat family protein, putative, expressed
AT1G14490.2	28	24	27	24	-0.182765	Putative AT-hook DNA-binding family protein		PF03479	PTHR31100,PTHR31100:SF1			LOC_Os09g28930.1	DNA binding protein, putative, expressed
AT1G14510.1	404	498	401	500	0.316996	alfin-like 7	AL7	PF00628,PF12165	PTHR12321,PTHR12321:SF60	KOG1632	GO:0005515,GO:0042393,GO:0006355	LOC_Os11g14010.1	PHD finger protein, putative, expressed
AT1G14520.3	629	677	625	680	0.120581	myo-inositol oxygenase 1	MIOX1	PF05153	PTHR12588,PTHR12588:SF1	KOG1573	GO:0055114,GO:0050113,GO:0019310,GO:0005737,GO:0005506	LOC_Os06g36560.1	inositol oxygenase, putative, expressed
AT1G14530.2	111	93	110	93	-0.243039	tobamovirus multiplication-like protein (DUF1084)	THH1	PF06454	PTHR31142,PTHR31142:SF3			LOC_Os10g39220.1	tobamovirus multiplication protein, putative, expressed
AT1G14540.1	1	6	1	6	2.59842	Peroxidase superfamily protein	PER4	PF00141	PTHR31388,PTHR31388:SF37		GO:0055114,GO:0020037,GO:0006979,GO:0004601	LOC_Os07g48050.1	peroxidase precursor, putative, expressed
AT1G14560.1	19	34	18	34	0.891739	Mitochondrial substrate carrier family protein		PF00153	PTHR24089,PTHR24089:SF331	KOG0752		LOC_Os01g38990.1	mitochondrial carrier protein, putative, expressed
AT1G14570.1	28	20	28	20	-0.508769	UBX domain-containing protein		PF00789,PF14555,PF13899	PTHR23322,PTHR23322:SF6	KOG1364	GO:0005515	LOC_Os04g57520.1	UBX domain-containing protein, putative, expressed
AT1G14580.3	11	10	10	10	-0.131051	C2H2-like zinc finger protein			PTHR10593,PTHR10593:SF38	KOG3576,KOG2462		LOC_Os09g38340.3	ZOS9-17 - C2H2 zinc finger protein, expressed
AT1G14590.1	124	131	123	131	0.0871228	Nucleotide-diphospho-sugar transferase family protein		PF03407	PTHR24015,PTHR24015:SF419			LOC_Os04g49590.1	regulatory protein, putative, expressed
AT1G14600.1	14	16	13	16	0.212725	Homeodomain-like superfamily protein		PF00249	PTHR31314			LOC_Os02g45080.1	MYB family transcription factor, putative, expressed
AT1G14610.1	1452	1145	1444	1149	-0.329341	valyl-tRNA synthetase / valine-tRNA ligase (VALRS)	TWN2	PF08264,PF00133	PTHR11946,PTHR11946:SF5		GO:0006418,GO:0000166,GO:0005524,GO:0004812,GO:0006438,GO:0004832	LOC_Os03g48850.1	valyl-tRNA synthetase, putative, expressed
AT1G14620.1	109	138	108	139	0.353589	decoy	DECOY	PF11788	PTHR13124	KOG4548		LOC_Os06g19640.1	39S ribosomal protein L46, mitochondrial precursor, putative, expressed
AT1G14630.1	40	26	39	26	-0.618016	XRI1-like protein			PTHR33385,PTHR33385:SF5			LOC_Os09g27590.1	expressed protein
AT1G14640.1	62	51	61	51	-0.256829	SWAP (Suppressor-of-White-APricot)/surp domain-containing protein		PF01805,PF12230	PTHR15316,PTHR15316:SF1	KOG0007	GO:0006396,GO:0003723	LOC_Os02g14780.1	splicing factor 3 subunit 1, putative, expressed
AT1G14650.1	256	302	254	303	0.2522	SWAP (Suppressor-of-White-APricot)/surp domain-containing protein / ubiquitin family protein		PF00240,PF01805,PF12230	PTHR15316,PTHR15316:SF1	KOG0007	GO:0005515,GO:0006396,GO:0003723	LOC_Os02g14780.1	splicing factor 3 subunit 1, putative, expressed
AT1G14660.1	30	26	29	26	-0.196804	Na+/H+ exchanger 8	NHX8	PF00999	PTHR10110,PTHR10110:SF86	KOG1965	GO:0055085,GO:0016021,GO:0015299,GO:0006812	LOC_Os12g44360.2	sodium/hydrogen exchanger 7, putative, expressed
AT1G14670.1	1920	1865	1909	1872	-0.0284356	Endomembrane protein 70 protein family		PF02990	PTHR10766,PTHR10766:SF58		GO:0016021	LOC_Os03g13380.1	transmembrane 9 superfamily member, putative, expressed
AT1G14680.1	12	16	12	16	0.383247	early endosome antigen			PTHR35689,PTHR35689:SF1			LOC_Os02g58470.1	expressed protein
AT1G14685.1	26	22	25	22	-0.232665	basic pentacysteine 2	BPC2	PF06217	PTHR31421,PTHR31421:SF0			LOC_Os10g02584.3	GAGA-binding protein, putative, expressed
AT1G14686.1	5	4	5	4	-0.500298	ENTH/ANTH/VHS superfamily protein		PF07651	PTHR22951,PTHR22951:SF19		GO:0005543	LOC_Os08g36410.1	ANTH domain containing protein, expressed
AT1G14687.1	33	42	33	42	0.36125	homeobox protein 32	HB32	PF04770	PTHR31948,PTHR31948:SF16			LOC_Os09g24820.1	ZF-HD protein dimerisation region containing protein, expressed
AT1G14690.1	500	459	497	461	-0.108517	microtubule-associated protein 65-7	MAP65-7	PF03999	PTHR19321,PTHR19321:SF5		GO:0008017,GO:0000910,GO:0000226	LOC_Os09g27700.1	microtubule associated protein, putative, expressed
AT1G14710.1	198	220	196	220	0.16589	hydroxyproline-rich glycoprotein family protein			PTHR31447,PTHR31447:SF0	KOG4176		LOC_Os10g02760.2	hydroxyproline-rich glycoprotein family protein, putative, expressed
AT1G14720.1	381	516	378	518	0.451456	xyloglucan endotransglucosylase/hydrolase 28	XTH28	PF06955,PF00722	PTHR31062,PTHR31062:SF44		GO:0048046,GO:0016762,GO:0006073,GO:0005618,GO:0005975,GO:0004553	LOC_Os10g02770.1	glycosyl hydrolases family 16, putative, expressed
AT1G14730.1	148	118	147	118	-0.313394	Cytochrome b561/ferric reductase transmembrane protein family		PF03188	PTHR10106,PTHR10106:SF15	KOG1619	GO:0016021	LOC_Os03g50820.1	cytochrome b561, putative, expressed
AT1G14740.1	563	705	559	708	0.339247	class I heat shock protein, putative (DUF1423)	TTA1	PF07227,PF16312	PTHR21736,PTHR21736:SF15			LOC_Os03g13590.1	potyvirus VPg interacting protein, putative, expressed
AT1G14755.1	16	12	16	12	-0.402049	S locus-related glycoprotein 1 (SLR1) binding pollen coat protein family
AT1G14770.1	84	112	84	112	0.428392	RING/FYVE/PHD zinc finger superfamily protein						LOC_Os11g29240.1	expressed protein
AT1G14780.1	4	9	4	9	1.18339	MAC/Perforin domain-containing protein		PF01823	PTHR33199,PTHR33199:SF4			LOC_Os02g50340.1	membrane attack complex component/perforin/complement C9, putative, expressed
AT1G14790.1	322	304	320	305	-0.0673772	RNA-dependent RNA polymerase 1	RDR1	PF05183	PTHR23079,PTHR23079:SF9		GO:0003968	LOC_Os02g50330.1	RNA-dependent RNA polymerase, putative, expressed
AT1G14800.1	6	2	5	2	-1.86189	Nucleic acid-binding, OB-fold-like protein			PTHR23273			LOC_Os03g08400.1	retrotransposon protein, putative, unclassified, expressed
AT1G14810.1	306	274	304	275	-0.14576	semialdehyde dehydrogenase family protein		PF01118,PF02774	PTHR10174,PTHR10174:SF2	KOG4777	GO:0055114,GO:0051287,GO:0016620,GO:0046983,GO:0008652,GO:0005737,GO:0003942	LOC_Os03g55280.1	semialdehyde dehydrogenase, NAD binding domain containing protein, putative, expressed
AT1G14820.3	150	178	149	179	0.264887	Sec14p-like phosphatidylinositol transfer family protein		PF00650	PTHR10174,PTHR10174:SF121	KOG1471		LOC_Os01g70210.1	CRAL/TRIO domain containing protein, expressed
AT1G14830.1	1277	1212	1270	1216	-0.0625258	DYNAMIN-like 1C	DL1C	PF02212,PF00350,PF01031	PTHR11566,PTHR11566:SF80		GO:0005525,GO:0003924	LOC_Os03g50520.1	dynamin family protein, putative, expressed
AT1G14840.1	467	365	465	366	-0.344105	microtubule-associated proteins 70-4	MAP70-4	PF07058	PTHR31246		GO:0008017,GO:0007010	LOC_Os02g50320.1	ATMAP70 protein, putative, expressed
AT1G14850.1	552	381	549	383	-0.520097	nucleoporin 155	NUP155	PF08801	PTHR10350,PTHR10350:SF6		GO:0017056,GO:0006913,GO:0005643	LOC_Os06g20090.1	NUP155, putative, expressed
AT1G14870.1	39	91	39	91	1.228	PLANT CADMIUM RESISTANCE 2	PCR2	PF04749	PTHR15907,PTHR15907:SF43			LOC_Os02g36940.1	uncharacterized Cys-rich domain containing protein, putative, expressed
AT1G14880.1	15	2	14	2	-2.84465	PLANT CADMIUM RESISTANCE 1	PCR1	PF04749	PTHR15907,PTHR15907:SF43			LOC_Os02g36940.1	uncharacterized Cys-rich domain containing protein, putative, expressed
AT1G14890.1	485	653	482	656	0.442549	Plant invertase/pectin methylesterase inhibitor superfamily protein		PF04043	PTHR31080,PTHR31080:SF10		GO:0004857	LOC_Os06g49760.1	invertase/pectin methylesterase inhibitor family protein, putative, expressed
AT1G14900.1	651	646	647	649	0.00346633	high mobility group A	HMGA	PF00538	PTHR11467,PTHR11467:SF29		GO:0006334,GO:0005634,GO:0003677,GO:0000786	LOC_Os08g33190.1	linker histone H1 and H5 family protein, expressed
AT1G14910.1	664	590	660	592	-0.155981	ENTH/ANTH/VHS superfamily protein		PF07651	PTHR22951,PTHR22951:SF25		GO:0005543	LOC_Os05g47550.1	ANTH/ENTH domain containing protein, putative, expressed
AT1G14920.1	675	579	671	581	-0.209106	GRAS family transcription factor family protein	GAI	PF12041,PF03514	PTHR31636,PTHR31636:SF50			LOC_Os03g49990.1	GRAS family transcription factor domain containing protein, expressed
AT1G14950.1	8	1	8	1	-2.98654	Polyketide cyclase/dehydrase and lipid transport superfamily protein		PF00407	PTHR31338,PTHR31338:SF15		GO:0009607,GO:0006952	LOC_Os04g39150.1	pathogenesis-related Bet v I family protein, putative, expressed
AT1G14970.1	24	19	24	19	-0.361739	O-fucosyltransferase family protein		PF10250	PTHR31288,PTHR31288:SF10			LOC_Os05g38490.1	growth regulator related protein, putative, expressed
AT1G14980.1	403	582	400	584	0.545376	chaperonin 10	CPN10	PF00166	PTHR10772,PTHR10772:SF8	KOG1641	GO:0006457,GO:0005737	LOC_Os03g25050.1	chaperonin, putative, expressed
AT1G14990.2	132	151	131	152	0.207341	transmembrane protein			PTHR36712,PTHR36712:SF1			LOC_Os01g42120.1	expressed protein
AT1G15000.1	232	196	230	196	-0.230388	serine carboxypeptidase-like 50	scpl50	PF00450	PTHR11802,PTHR11802:SF58	KOG1282	GO:0006508,GO:0004185	LOC_Os05g50600.1	OsSCP31 - Putative Serine Carboxypeptidase homologue, expressed
AT1G15010.1	19	13	19	13	-0.534025	mediator of RNA polymerase II transcription subunit			PTHR33782,PTHR33782:SF1			LOC_Os01g03130.1	expressed protein
AT1G15020.2	213	206	212	206	-0.0381764	quiescin-sulfhydryl oxidase 1	QSOX1	PF00085,PF04777	PTHR22897,PTHR22897:SF8		GO:0045454,GO:0055114,GO:0016972	LOC_Os05g47930.1	OsQSOXL1 quiescin-sulfhydryl oxidase-like OsQSOXL1, expressed
AT1G15030.1	311	240	309	241	-0.360406	hypothetical protein (DUF789)		PF05623	PTHR31343,PTHR31343:SF8			LOC_Os03g61580.1	expressed protein
AT1G15040.1	34	38	34	38	0.174117	Class I glutamine amidotransferase-like superfamily protein	GAT1_2.1	PF00117	PTHR11922,PTHR11922:SF38			LOC_Os01g04620.3	transposon protein, putative, unclassified, expressed
AT1G15060.1	77	68	77	68	-0.166135	alpha/beta hydrolase family protein		PF12695	PTHR11005,PTHR11005:SF2			LOC_Os01g49760.1	expressed protein
AT1G15080.1	58	49	58	49	-0.244718	lipid phosphate phosphatase 2	LPP2	PF01569	PTHR10165,PTHR10165:SF80	KOG3030		LOC_Os08g27040.1	lipid phosphatase protein, putative, expressed
AT1G15085.1	6	9	6	9	0.598425	hypothetical protein
AT1G15100.1	92	168	91	168	0.885749	RING-H2 finger A2A	RHA2A	PF13639	PTHR14155,PTHR14155:SF175		GO:0008270,GO:0005515	LOC_Os04g16970.1	zinc finger, C3HC4 type domain containing protein, expressed
AT1G15110.2	37	61	36	61	0.742693	phosphatidyl serine synthase family protein	PSS1	PF03034	PTHR15362,PTHR15362:SF6		GO:0006659	LOC_Os01g02890.1	phosphatidylserine synthase, putative, expressed
AT1G15120.2	676	779	672	782	0.217014	Ubiquinol-cytochrome C reductase hinge protein		PF02320	PTHR15336,PTHR15336:SF2	KOG4763	GO:0008121,GO:0006122	LOC_Os11g06340.1	ubiquinol-cytochrome C reductase hinge protein, putative, expressed
AT1G15125.1	8	7	8	7	-0.286124	S-adenosyl-L-methionine-dependent methyltransferases superfamily protein		PF03492	PTHR31009,PTHR31009:SF14		GO:0008168	LOC_Os04g56950.1	jasmonate O-methyltransferase, putative, expressed
AT1G15130.1	919	829	914	832	-0.134463	Endosomal targeting BRO1-like domain-containing protein		PF13949,PF03097	PTHR23030		GO:0005515	LOC_Os10g35250.1	vacuolar protein-sorting protein bro1, putative, expressed
AT1G15140.1	294	354	292	355	0.283553	FAD/NAD(P)-binding oxidoreductase		PF00175	PTHR19370,PTHR19370:SF123		GO:0055114,GO:0016491	LOC_Os02g22260.1	fruit protein PKIWI502, putative, expressed
AT1G15150.1	3	7	3	7	1.23585	MATE efflux family protein		PF01554	PTHR11206,PTHR11206:SF87	KOG1347	GO:0055085,GO:0016020,GO:0015297,GO:0015238,GO:0006855	LOC_Os01g49120.1	MATE efflux family protein, putative, expressed
AT1G15160.1	57	67	57	67	0.235384	MATE efflux family protein		PF01554	PTHR11206,PTHR11206:SF87	KOG1347	GO:0055085,GO:0016020,GO:0015297,GO:0015238,GO:0006855	LOC_Os01g49120.1	MATE efflux family protein, putative, expressed
AT1G15165.1	43	40	43	40	-0.108575	RING/FYVE/PHD zinc finger superfamily protein		PF04564	PTHR22849,PTHR22849:SF28		GO:0016567,GO:0004842	LOC_Os04g41250.1	armadillo/beta-catenin repeat family protein, putative, expressed
AT1G15170.1	95	70	94	70	-0.419875	MATE efflux family protein		PF01554	PTHR11206,PTHR11206:SF87	KOG1347	GO:0055085,GO:0016020,GO:0015297,GO:0015238,GO:0006855	LOC_Os01g49120.1	MATE efflux family protein, putative, expressed
AT1G15180.1	188	167	187	168	-0.157324	MATE efflux family protein		PF01554	PTHR11206,PTHR11206:SF87	KOG1347	GO:0055085,GO:0016020,GO:0015297,GO:0015238,GO:0006855	LOC_Os01g31980.1	MATE efflux family protein, putative, expressed
AT1G15190.1	9	8	9	8	-0.249193	Fasciclin-like arabinogalactan family protein			PTHR33985
AT1G15210.1	3	7	3	7	1.12938	pleiotropic drug resistance 7	ABCG35	PF14510,PF08370,PF00005,PF01061	PTHR19241,PTHR19241:SF224		GO:0016887,GO:0005524,GO:0016020	LOC_Os01g42410.1	pleiotropic drug resistance protein, putative, expressed
AT1G15215.4	32	39	31	39	0.30204	SAWADEE HOMEODOMAIN protein	SHH1	PF16719	PTHR33827,PTHR33827:SF1			LOC_Os09g17770.1	retrotransposon protein, putative, unclassified, expressed
AT1G15220.1	59	55	59	55	-0.0879245	cytochrome c biogenesis protein family	CCMH	PF03918	PTHR30009			LOC_Os02g17520.1	cytochrome c-type biogenesis protein ccmH precursor, putative, expressed
AT1G15230.1	234	235	232	235	0.0196076	hypothetical protein			PTHR36713,PTHR36713:SF1			LOC_Os09g17580.1	expressed protein
AT1G15240.2	85	64	84	64	-0.38713	phox (PX) domain-containing protein		PF00787,PF08628,PF02194	PTHR22999,PTHR22999:SF19		GO:0035091	LOC_Os05g50660.1	PX domain containing protein, putative, expressed
AT1G15250.1	122	171	121	172	0.500578	Zinc-binding ribosomal protein family protein		PF01907	PTHR10768	KOG3475	GO:0006412,GO:0005840,GO:0005622,GO:0003735	LOC_Os02g56990.1	ribosomal protein L37, putative, expressed
AT1G15260.1	425	493	422	495	0.229304	LOW protein: ATP-dependent RNA helicase-like protein			PTHR35461
AT1G15270.1	992	1259	987	1264	0.35732	Translation machinery associated TMA7		PF09072	PTHR28632	KOG4766		LOC_Os02g06450.1	coiled-coil domain-containing protein 72, putative, expressed
AT1G15280.2	180	122	179	122	-0.549355	CASC3/Barentsz eIF4AIII binding protein		PF09405	PTHR22814,PTHR22814:SF97			LOC_Os05g45830.1	expressed protein
AT1G15290.1	1619	1145	1610	1149	-0.4869	Tetratricopeptide repeat (TPR)-like superfamily protein		PF15044,PF12807,PF13424	PTHR12601,PTHR12601:SF18			LOC_Os04g55230.1	tetratricopeptide repeat domain containing protein, putative, expressed
AT1G15310.1	176	185	175	186	0.0855061	signal recognition particle 54 kDa subunit	ATHSRP54A	PF02492,PF02881,PF02978	PTHR11564,PTHR11564:SF5		GO:0006614,GO:0005525,GO:0048500,GO:0008312	LOC_Os01g56600.1	signal recognition particle 54 kDa protein, putative, expressed
AT1G15330.1	6	1	6	1	-2.5715	Cystathionine beta-synthase (CBS) protein		PF00571	PTHR13780,PTHR13780:SF51	KOG1764		LOC_Os02g06410.1	CBS domain containing membrane protein, putative, expressed
AT1G15340.1	1014	980	1009	984	-0.0358085	methyl-CPG-binding domain 10	MBD10	PF01429	PTHR33729,PTHR33729:SF1		GO:0005634,GO:0003677	LOC_Os12g42550.1	methyl-CpG binding domain containing protein, putative, expressed
AT1G15350.1	67	67	66	67	0.0244402	DUF4050 family protein		PF13259	PTHR33373,PTHR33373:SF4			LOC_Os02g10720.1	expressed protein
AT1G15370.1	338	428	336	429	0.354493	SNARE-like superfamily protein			PTHR11043,PTHR11043:SF9			LOC_Os03g63910.1	PPR repeat domain containing protein, putative, expressed
AT1G15380.1	27	24	26	24	-0.129566	Lactoylglutathione lyase / glyoxalase I family protein	GLYI4	PF12681	PTHR10374,PTHR10374:SF18	KOG2944		LOC_Os05g07940.1	glyoxalase family protein, putative, expressed
AT1G15390.1	157	171	156	171	0.132419	peptide deformylase 1A	PDF1A	PF01327	PTHR10458,PTHR10458:SF11	KOG3137	GO:0042586,GO:0005506	LOC_Os01g37510.1	peptide deformylase, putative, expressed
AT1G15400.3	217	219	215	219	0.0268536	hypothetical protein		PF15697	PTHR33730,PTHR33730:SF4			LOC_Os05g46500.1	expressed protein
AT1G15410.1	507	495	504	497	-0.0197597	aspartate-glutamate racemase family		PF01177	PTHR21198,PTHR21198:SF7		GO:0036361,GO:0006807	LOC_Os01g37470.1	asp/Glu racemase, putative, expressed
AT1G15415.1	47	46	46	46	-0.00234207	late embryogenesis abundant-like protein			PTHR34191,PTHR34191:SF3
AT1G15420.1	150	151	149	151	0.0227608	WD repeat protein		PF04003				LOC_Os01g46060.1	NUC189 domain containing protein, expressed
AT1G15430.1	115	115	114	115	0.0134128	hypothetical protein (DUF1644)		PF07800	PTHR31197,PTHR31197:SF5			LOC_Os07g23790.3	expressed protein
AT1G15440.1	131	92	130	92	-0.504224	periodic tryptophan protein 2	PWP2	PF04003,PF00400	PTHR19858		GO:0005515	LOC_Os05g44320.1	WD domain, G-beta repeat domain containing protein, expressed
AT1G15460.1	12	12	12	12	-0.0488667	HCO3- transporter family	BOR4	PF00955	PTHR11453,PTHR11453:SF48		GO:0016021,GO:0006820,GO:0016020,GO:0005452	LOC_Os01g08020.1	boron transporter protein, putative, expressed
AT1G15470.1	225	199	223	200	-0.160443	Transducin/WD40 repeat-like superfamily protein		PF00400	PTHR19877		GO:0005515	LOC_Os02g11060.1	WD domain, G-beta repeat domain containing protein, expressed
AT1G15480.1	93	107	93	107	0.208947	Tetratricopeptide repeat (TPR)-like superfamily protein		PF13812,PF01535	PTHR24015,PTHR24015:SF26			LOC_Os01g17320.1	PPR repeat domain containing protein, putative, expressed
AT1G15490.1	192	187	191	187	-0.028384	alpha/beta-Hydrolases superfamily protein		PF12697	PTHR10992,PTHR10992:SF898	KOG1454		LOC_Os01g45960.1	hydrolase, alpha/beta fold family domain containing protein, expressed
AT1G15500.1	1669	1477	1660	1483	-0.162857	TLC ATP/ADP transporter	ATNTT2	PF03219	PTHR31187,PTHR31187:SF3		GO:0016021,GO:0006810,GO:0005524,GO:0005471	LOC_Os02g11740.1	plastidic ATP/ADP-transporter, putative, expressed
AT1G15510.1	94	64	93	64	-0.552447	Tetratricopeptide repeat (TPR)-like superfamily protein	ECB2	PF14432,PF01535,PF13041	PTHR24015,PTHR24015:SF156			LOC_Os05g49920.1	pentatricopeptide, putative, expressed
AT1G15520.1	16	16	15	16	0.0131592	pleiotropic drug resistance 12	ABCG40	PF14510,PF08370,PF00005,PF01061	PTHR19241,PTHR19241:SF219		GO:0016887,GO:0005524,GO:0016020	LOC_Os01g42380.1	pleiotropic drug resistance protein, putative, expressed
AT1G15530.1	168	175	167	176	0.0764929	Concanavalin A-like lectin protein kinase family protein		PF00069,PF00139	PTHR27007,PTHR27007:SF30	KOG1187	GO:0006468,GO:0005524,GO:0004672,GO:0030246	LOC_Os04g44900.1	lectin-like receptor kinase, putative, expressed
AT1G15550.1	89	48	89	48	-0.892439	gibberellin 3-oxidase 1	GA3OX1	PF14226,PF03171	PTHR10209,PTHR10209:SF95	KOG0143	GO:0055114,GO:0016491	LOC_Os01g08220.1	gibberellin 3-beta-dioxygenase 2-2, putative, expressed
AT1G15570.1	212	179	211	179	-0.234676	CYCLIN A2;3	CYCA2;3	PF02984,PF00134	PTHR10177,PTHR10177:SF239	KOG0654	GO:0005634	LOC_Os12g31810.1	cyclin, putative, expressed
AT1G15580.1	16	21	16	21	0.406282	indole-3-acetic acid inducible 5	IAA5	PF02309	PTHR31734,PTHR31734:SF12		GO:0006355,GO:0005634	LOC_Os03g43410.1	OsIAA12 - Auxin-responsive Aux/IAA gene family member, expressed
AT1G15660.1	202	157	200	158	-0.346689	centromere protein C	CENP-C		PTHR16684		GO:0051382,GO:0019237,GO:0000776	LOC_Os01g43050.1	CENP-C1, putative, expressed
AT1G15670.1	53	166	53	166	1.65614	Galactose oxidase/kelch repeat superfamily protein		PF13964	PTHR24413,PTHR24413:SF93			LOC_Os06g39370.1	OsFBK16 - F-box domain and kelch repeat containing protein, expressed
AT1G15690.1	8304	7453	8259	7482	-0.142531	Inorganic H pyrophosphatase family protein	AVP1	PF03030	PTHR31998,PTHR31998:SF14		GO:0016020,GO:0015992,GO:0009678,GO:0004427	LOC_Os02g09150.1	inorganic H+ pyrophosphatase, putative, expressed
AT1G15700.1	102	142	101	143	0.497968	ATPase, F1 complex, gamma subunit protein	ATPC2	PF00231	PTHR11693,PTHR11693:SF21	KOG1531	GO:0046961,GO:0046933,GO:0045261,GO:0015986	LOC_Os07g32880.1	ATP synthase gamma chain, putative, expressed
AT1G15710.1	250	219	249	220	-0.17749	prephenate dehydrogenase family protein		PF02153	PTHR11811,PTHR11811:SF35		GO:0055114,GO:0008977,GO:0006571,GO:0004665	LOC_Os06g49505.1	arogenate dehydrogenase 1, chloroplast precursor, putative, expressed
AT1G15720.1	37	53	37	53	0.532251	TRF-like 5	TRFL5	PF00249	PTHR21717			LOC_Os06g08290.1	MYB family transcription factor, putative, expressed
AT1G15730.1	259	293	258	294	0.188845	Cobalamin biosynthesis CobW-like protein		PF07683,PF02492	PTHR13748,PTHR13748:SF43			LOC_Os02g55630.1	COBW domain containing protein, putative, expressed
AT1G15740.1	351	271	349	272	-0.357749	Leucine-rich repeat family protein		PF13855	PTHR24006,PTHR24006:SF451		GO:0005515	LOC_Os04g42470.3	regulatory subunit, putative, expressed
AT1G15750.1	6	5	5	5	-0.277014	Transducin family protein / WD-40 repeat family protein	TPL	PF00400	PTHR22847,PTHR22847:SF480	KOG0266	GO:0005515	LOC_Os03g14980.2	lissencephaly type-1-like homology motif, putative, expressed
AT1G15760.1	42	49	41	49	0.238439	Sterile alpha motif (SAM) domain-containing protein		PF07647	PTHR33915		GO:0005515	LOC_Os06g43770.1	expressed protein
AT1G15780.2	113	127	112	127	0.175997	mediator of RNA polymerase II transcription subunit 15a-like protein	NRB4	PF16987	PTHR33137,PTHR33137:SF4			LOC_Os08g45080.1	expressed protein
AT1G15790.3	27	18	26	18	-0.585362	mediator of RNA polymerase II transcription subunit 15a-like protein		PF16987	PTHR33137			LOC_Os08g45080.1	expressed protein
AT1G15800.1	24	17	23	17	-0.453585	hypothetical protein			PTHR35099,PTHR35099:SF2
AT1G15810.1	518	587	515	589	0.195667	S15/NS1, RNA-binding protein		PF00312	PTHR23321,PTHR23321:SF26	KOG2815	GO:0006412,GO:0005840,GO:0005622,GO:0003735	LOC_Os02g55940.1	ribosomal protein S15 containing protein, expressed
AT1G15820.1	19274	19482	19171	19559	0.0289337	light harvesting complex photosystem II subunit 6	LHCB6	PF00504	PTHR21649,PTHR21649:SF2		GO:0016020,GO:0009765	LOC_Os04g38410.1	chlorophyll A-B binding protein, putative, expressed
AT1G15825.1	52	40	52	40	-0.383413	hydroxyproline-rich glycoprotein family protein
AT1G15830.1	144	193	143	194	0.436053	hypothetical protein
AT1G15860.3	297	300	295	301	0.02788	defective in cullin neddylation protein (DUF298)		PF03556	PTHR12281	KOG3077		LOC_Os08g34070.1	DCN1, putative, expressed
AT1G15870.1	11	20	11	20	0.875959	Mitochondrial glycoprotein family protein		PF02330	PTHR10826,PTHR10826:SF14	KOG2536	GO:0005759	LOC_Os08g34130.1	mitochondrial glycoprotein, putative, expressed
AT1G15880.1	257	270	255	271	0.0847432	golgi snare 11	GOS11	PF12352	PTHR21094,PTHR21094:SF1	KOG3208	GO:0016021,GO:0006888,GO:0005801,GO:0000139	LOC_Os08g34140.1	vesicle transport v-SNARE protein, putative, expressed
AT1G15885.1	21	16	20	16	-0.390167	hypothetical protein
AT1G15890.1	4	9	4	9	1.10126	Disease resistance protein (CC-NBS-LRR class) family		PF13855,PF00931	PTHR23155,PTHR23155:SF639		GO:0005515,GO:0043531	LOC_Os01g57870.2	disease resistance protein RPS2, putative, expressed
AT1G15910.1	364	301	362	302	-0.261082	XH/XS domain-containing protein	FDM1	PF03470,PF03468,PF03469	PTHR21596,PTHR21596:SF3		GO:0031047	LOC_Os01g44230.1	transcription factor X1, putative, expressed
AT1G15920.1	175	189	174	189	0.124817	Polynucleotidyl transferase, ribonuclease H-like superfamily protein		PF04857	PTHR10797	KOG0304	GO:0005634	LOC_Os02g55300.1	CAF1 family ribonuclease containing protein, putative, expressed
AT1G15930.1	1481	1863	1473	1870	0.344628	Ribosomal protein L7Ae/L30e/S12e/Gadd45 family protein		PF01248	PTHR11843	KOG3406	GO:0006412,GO:0005840,GO:0005622,GO:0003735	LOC_Os07g05580.1	ribosomal protein L7Ae, putative, expressed
AT1G15940.1	655	624	651	626	-0.0565569	Tudor/PWWP/MBT superfamily protein			PTHR12663,PTHR12663:SF3			LOC_Os02g39920.1	AT hook motif family protein, expressed
AT1G15950.1	1013	688	1007	691	-0.543885	cinnamoyl coa reductase 1	CCR1	PF01370	PTHR10366,PTHR10366:SF404	KOG1502	GO:0050662,GO:0003824	LOC_Os08g34280.1	cinnamoyl-CoA reductase, putative, expressed
AT1G15960.1	899	637	894	640	-0.482727	NRAMP metal ion transporter 6	NRAMP6	PF01566	PTHR11706,PTHR11706:SF33		GO:0016020,GO:0006810,GO:0005215	LOC_Os06g46310.2	metal transporter Nramp6, putative, expressed
AT1G15970.1	234	217	232	217	-0.09553	DNA glycosylase superfamily protein		PF03352	PTHR31116,PTHR31116:SF1		GO:0008725,GO:0006284	LOC_Os06g44050.1	methyladenine glycosylase, putative, expressed
AT1G15980.1	1340	1183	1332	1187	-0.166394	NDH-dependent cyclic electron flow 1	PnsB1		PTHR37698,PTHR37698:SF1			LOC_Os08g17390.1	expressed protein
AT1G15990.1	80	77	80	77	-0.0506237	cyclic nucleotide gated channel 7	CNGC7	PF00027,PF00520	PTHR10217,PTHR10217:SF489		GO:0055085,GO:0016020,GO:0006811,GO:0005216	LOC_Os04g55080.1	cyclic nucleotide-gated ion channel, putative, expressed
AT1G16000.1	123	159	122	159	0.379479	GAG1At protein			PTHR35990			LOC_Os12g36930.1	expressed protein
AT1G16010.1	254	232	253	233	-0.117222	magnesium transporter 2	MGT2		PTHR13890,PTHR13890:SF5			LOC_Os06g44150.1	CorA-like magnesium transporter protein, putative, expressed
AT1G16020.1	30	21	29	21	-0.51115	vacuolar fusion protein (DUF1712)		PF08217	PTHR13056			LOC_Os08g33076.1	myrosinase precursor, putative, expressed
AT1G16022.1	16	16	15	16	0.0137654	transmembrane protein
AT1G16025.1	15	15	14	15	0.014042	hypothetical protein
AT1G16030.1	85	78	85	78	-0.110526	heat shock protein 70B	Hsp70b	PF00012	PTHR19375,PTHR19375:SF229			LOC_Os05g38530.1	DnaK family protein, putative, expressed
AT1G16060.1	25	15	25	15	-0.771772	ARIA-interacting double AP2 domain protein	ADAP	PF00847	PTHR32467,PTHR32467:SF20		GO:0006355,GO:0003700,GO:0007275	LOC_Os06g05340.1	AP2 domain containing protein, expressed
AT1G16070.1	88	78	88	78	-0.169924	tubby like protein 8	TLP8	PF01167	PTHR16517,PTHR16517:SF27	KOG2502		LOC_Os02g08310.1	tubby, putative, expressed
AT1G16080.1	1304	1238	1297	1243	-0.0615031	nuclear protein			PTHR34044			LOC_Os08g16570.1	expressed protein
AT1G16090.1	25	42	25	42	0.761924	wall associated kinase-like 7	WAKL7	PF08488,PF13947	PTHR33491,PTHR33491:SF5		GO:0016021,GO:0004674,GO:0030247	LOC_Os11g47140.1	OsWAK123 - OsWAK receptor-like protein kinase, expressed
AT1G16110.1	12	18	11	18	0.659664	wall associated kinase-like 6	WAKL6	PF13947,PF08488,PF00069	PTHR27005,PTHR27005:SF7	KOG0198	GO:0030247,GO:0016021,GO:0004674,GO:0006468,GO:0005524,GO:0004672	LOC_Os03g62430.1	OsWAK28 - OsWAK receptor-like protein kinase, expressed
AT1G16130.1	9	26	9	26	1.54398	wall associated kinase-like 2	WAKL2	PF13947,PF08488,PF07714	PTHR27005,PTHR27005:SF7	KOG1187	GO:0030247,GO:0016021,GO:0004674,GO:0006468,GO:0004672	LOC_Os04g51050.1	OsWAK53b - OsWAK receptor-like protein kinase, expressed
AT1G16170.1	155	151	154	152	-0.019721	ephrin-A3 protein			PTHR34774,PTHR34774:SF1			LOC_Os08g16559.1	expressed protein
AT1G16180.1	300	192	298	192	-0.634277	Serinc-domain containing serine and sphingolipid biosynthesis protein		PF03348	PTHR10383,PTHR10383:SF25	KOG2592	GO:0016020	LOC_Os02g54990.2	TMS membrane protein/tumour differentially expressed protein, putative, expressed
AT1G16190.1	66	71	65	71	0.120168	Rad23 UV excision repair protein family	RAD23A	PF00240,PF09280,PF00627	PTHR10621,PTHR10621:SF9	KOG0011	GO:0005515,GO:0043161,GO:0006289,GO:0003684	LOC_Os02g08300.2	RAD23 DNA repair protein, putative, expressed
AT1G16210.1	660	689	656	692	0.0765641	coiled-coil protein		PF06244	PTHR21680,PTHR21680:SF0	KOG3223		LOC_Os04g47370.2	coiled-coil domain-containing protein 124, putative, expressed
AT1G16220.1	44	53	44	53	0.281629	Protein phosphatase 2C family protein		PF00481	PTHR13832,PTHR13832:SF286	KOG0698	GO:0003824,GO:0006470,GO:0004722	LOC_Os08g39100.1	protein phosphatase 2C, putative, expressed
AT1G16240.1	207	262	205	263	0.35689	syntaxin of plants 51	SYP51	PF05739	PTHR19957,PTHR19957:SF119	KOG3202	GO:0005515	LOC_Os08g17600.2	SNARE domain containing protein, putative, expressed
AT1G16250.1	65	64	65	64	-0.020233	Galactose oxidase/kelch repeat superfamily protein		PF00646,PF01344	PTHR24414,PTHR24414:SF32		GO:0005515	LOC_Os10g24900.1	OsFBK22 - F-box domain and kelch repeat containing protein, expressed
AT1G16260.1	125	81	124	81	-0.606875	Wall-associated kinase family protein		PF13947,PF08488,PF07714	PTHR27005,PTHR27005:SF7	KOG1187	GO:0030247,GO:0016021,GO:0004674,GO:0006468,GO:0004672	LOC_Os04g55760.1	OsWAK55 - OsWAK receptor-like protein kinase, expressed
AT1G16270.1	201	121	200	121	-0.718728	kinase superfamily with octicosapeptide/Phox/Bem1p domain-containing protein		PF00564,PF07714	PTHR23257,PTHR23257:SF438	KOG0192	GO:0005515,GO:0006468,GO:0004672	LOC_Os07g25680.1	protein kinase domain containing protein, expressed
AT1G16280.1	136	133	135	134	-0.0185935	RNA helicase 36	RH36	PF00271,PF00270	PTHR24031,PTHR24031:SF302		GO:0005524,GO:0003676	LOC_Os07g43980.1	DEAD-box ATP-dependent RNA helicase, putative, expressed
AT1G16290.2	30	36	29	36	0.300523	transglycosylase		PF01464	PTHR37179			LOC_Os02g07480.1	transglycosylase SLT domain containing protein, expressed
AT1G16300.1	88	141	87	142	0.701828	glyceraldehyde-3-phosphate dehydrogenase of plastid 2	GAPCP-2	PF00044,PF02800	PTHR10836,PTHR10836:SF46	KOG0657	GO:0055114,GO:0016620	LOC_Os02g07490.1	glyceraldehyde-3-phosphate dehydrogenase, putative, expressed
AT1G16310.1	6	3	5	3	-0.86067	Cation efflux family protein		PF16916,PF01545	PTHR11562,PTHR11562:SF20		GO:0055085,GO:0016021,GO:0008324,GO:0006812	LOC_Os01g03914.2	cation efflux family protein, putative, expressed
AT1G16320.1	355	264	353	265	-0.414472	plant/protein (DUF2358)		PF10184	PTHR22750,PTHR22750:SF44	KOG4457		LOC_Os04g52330.1	expressed protein
AT1G16330.1	48	28	48	28	-0.764426	cyclin b3;1	CYCB3;1	PF02984,PF00134	PTHR10177,PTHR10177:SF222	KOG0653	GO:0005634	LOC_Os05g41390.1	cyclin, putative, expressed
AT1G16340.4	80	84	80	84	0.0749973	Aldolase superfamily protein	ATKDSA2	PF00793	PTHR21057,PTHR21057:SF2		GO:0009058,GO:0008676,GO:0008152,GO:0005737	LOC_Os12g10784.1	2-dehydro-3-deoxyphosphooctonate aldolase, putative, expressed
AT1G16350.1	614	648	610	650	0.0912427	Aldolase-type TIM barrel family protein		PF00478	PTHR11911,PTHR11911:SF6		GO:0055114,GO:0003824,GO:0006164,GO:0003938	LOC_Os03g56800.1	CBS domain containing membrane protein, putative, expressed
AT1G16370.1	6	4	5	4	-0.44698	organic cation/carnitine transporter 6	44110	PF07690	PTHR24064,PTHR24064:SF172	KOG0255	GO:0055085,GO:0016021	LOC_Os07g37510.1	organic cation transporter-related, putative, expressed
AT1G16390.1	957	1279	952	1284	0.431295	organic cation/carnitine transporter 3	44107	PF07690	PTHR24064,PTHR24064:SF242	KOG0255	GO:0055085,GO:0016021	LOC_Os07g37510.1	organic cation transporter-related, putative, expressed
AT1G16400.1	8	5	8	5	-0.66461	cytochrome P450, family 79, subfamily F, polypeptide 2	CYP79F2	PF00067	PTHR24298,PTHR24298:SF1	KOG0156	GO:0055114,GO:0020037,GO:0016705,GO:0005506	LOC_Os03g37290.1	cytochrome P450, putative, expressed
AT1G16410.1	48	76	47	76	0.68232	cytochrome p450 79f1	CYP79F1	PF00067	PTHR24298,PTHR24298:SF1	KOG0156	GO:0055114,GO:0020037,GO:0016705,GO:0005506	LOC_Os03g37290.1	cytochrome P450, putative, expressed
AT1G16430.1	60	60	59	60	0.0136992	Surfeit locus protein 5 subunit 22 of Mediator complex		PF06179	PTHR12434	KOG3304	GO:0016592,GO:0006357,GO:0001104	LOC_Os08g37480.2	mediator of RNA polymerase II transcription subunit 22, putative, expressed
AT1G16445.1	23	18	23	18	-0.340175	S-adenosyl-L-methionine-dependent methyltransferases superfamily protein		PF13847	PTHR35276,PTHR35276:SF1			LOC_Os05g43582.1	tRNA methyltran, putative, expressed
AT1G16460.2	1105	1140	1099	1144	0.0584274	rhodanese homologue 2	RDH2	PF00581	PTHR11364,PTHR11364:SF13	KOG1529		LOC_Os12g41500.1	rhodanese-like domain containing protein, putative, expressed
AT1G16470.1	235	281	233	282	0.274414	proteasome subunit PAB1	PAB1	PF10584,PF00227	PTHR11599,PTHR11599:SF16	KOG0181	GO:0019773,GO:0006511,GO:0004175,GO:0051603,GO:0005839,GO:0004298	LOC_Os02g42320.2	peptidase, T1 family, putative, expressed
AT1G16480.1	44	48	44	48	0.138603	Tetratricopeptide repeat (TPR)-like superfamily protein		PF14432,PF13041,PF01535	PTHR24015,PTHR24015:SF697			LOC_Os11g45410.1	expressed protein
AT1G16490.1	47	37	46	37	-0.316283	myb domain protein 58	MYB58	PF00249	PTHR10641,PTHR10641:SF462	KOG0048		LOC_Os04g50770.1	MYB family transcription factor, putative, expressed
AT1G16500.1	87	168	87	168	0.958604	filamentous hemagglutinin transporter			PTHR33177,PTHR33177:SF6			LOC_Os04g52700.1	expressed protein
AT1G16510.1	24	33	24	33	0.473048	SAUR-like auxin-responsive protein family		PF02519	PTHR31374,PTHR31374:SF37		GO:0009733	LOC_Os04g52670.1	OsSAUR21 - Auxin-responsive SAUR gene family member, expressed
AT1G16520.1	304	290	302	291	-0.0545837	interactor of constitutive active ROPs protein			PTHR31218,PTHR31218:SF17		GO:0022857,GO:0016021	LOC_Os03g45760.1	expressed protein
AT1G16540.3	63	50	62	50	-0.308436	molybdenum cofactor sulfurase (LOS5) (ABA3)	ABA3	PF03476,PF03473,PF00266	PTHR14237,PTHR14237:SF19	KOG2142	GO:0030170,GO:0030151,GO:0003824	LOC_Os06g45860.1	molybdenum cofactor sulfurase, putative, expressed
AT1G16560.1	126	116	125	116	-0.100312	Per1-like family protein		PF04080	PTHR13148,PTHR13148:SF2	KOG2970		LOC_Os05g13330.1	per1-like family protein, putative, expressed
AT1G16570.2	47	56	47	56	0.265924	UDP-Glycosyltransferase superfamily protein		PF13579,PF13692	PTHR13036,PTHR13036:SF0		GO:0016757	LOC_Os03g08300.2	glycosyl transferase, group 1 domain containing protein, expressed
AT1G16590.1	55	43	55	43	-0.341231	DNA-binding HORMA family protein	REV7	PF02301	PTHR11842,PTHR11842:SF10	KOG3186		LOC_Os04g40940.1	mitotic spindle checkpoint protein MAD2, putative, expressed
AT1G16610.3	881	1008	876	1011	0.2078	arginine/serine-rich 45	SR45	PF00076	PTHR15481	KOG0107	GO:0003676	LOC_Os01g72890.1	transposon protein, putative, CACTA, En/Spm sub-class, expressed
AT1G16630.1	92	59	91	59	-0.631982	transmembrane protein			PTHR34775,PTHR34775:SF3			LOC_Os03g46920.1	expressed protein
AT1G16640.1	15	23	14	23	0.678924	AP2/B3-like transcriptional factor family protein		PF02362	PTHR31920,PTHR31920:SF15		GO:0003677	LOC_Os11g09160.1	B3 DNA binding domain containing protein, expressed
AT1G16650.3	21	24	20	24	0.210711	S-adenosyl-L-methionine-dependent methyltransferases superfamily protein		PF13679	PTHR12496,PTHR12496:SF0			LOC_Os12g41670.1	expressed protein
AT1G16670.1	59	72	59	72	0.290605	Protein kinase superfamily protein		PF07714	PTHR27006,PTHR27006:SF22	KOG1187	GO:0006468,GO:0004672	LOC_Os04g52840.1	tyrosine protein kinase domain containing protein, putative, expressed
AT1G16680.1	295	279	293	280	-0.0696059	Chaperone DnaJ-domain superfamily protein		PF00226,PF14901	PTHR24078,PTHR24078:SF239			LOC_Os12g41820.1	heat shock protein DnaJ, putative, expressed
AT1G16690.1	113	96	112	96	-0.221754	Enhancer of polycomb-like transcription factor protein		PF10513	PTHR14898,PTHR14898:SF5		GO:0035267,GO:0032777,GO:0006357	LOC_Os09g11270.1	enhancer of polycomb, putative, expressed
AT1G16700.1	567	626	563	628	0.156323	Alpha-helical ferredoxin		PF12838	PTHR10849,PTHR10849:SF16	KOG3256		LOC_Os03g56300.1	4Fe-4S binding domain containing protein, expressed
AT1G16705.2	210	263	209	264	0.335429	p300/CBP acetyltransferase-related protein-like protein
AT1G16710.1	565	445	561	447	-0.32978	histone acetyltransferase of the CBP family 12	HAC12	PF00569,PF02135,PF08214	PTHR13808	KOG1778	GO:0008270,GO:0006355,GO:0005634,GO:0004402,GO:0003712,GO:0016573	LOC_Os02g04490.1	histone acetyltransferase HAC1, putative, expressed
AT1G16720.2	312	331	310	332	0.0965616	high chlorophyll fluorescence phenotype 173	HCF173	PF08547,PF05368	PTHR10366,PTHR10366:SF343	KOG1203		LOC_Os06g49120.1	Complex I intermediate-associated protein 30 domain containing protein, putative, expressed
AT1G16730.1	57	29	57	29	-0.961317	hypothetical protein	UP6
AT1G16740.1	194	270	193	271	0.487744	Ribosomal protein L20		PF00453	PTHR10986	KOG4707	GO:0019843,GO:0006412,GO:0005840,GO:0005622,GO:0003735	LOC_Os05g45220.1	50S ribosomal protein L20, putative, expressed
AT1G16750.1	161	148	160	148	-0.112887	GPI-anchored adhesin-like protein, putative (Protein of unknown function, DUF547)		PF14389,PF04784	PTHR23054,PTHR23054:SF30			LOC_Os06g49060.1	ternary complex factor MIP1, putative, expressed
AT1G16760.2	2	10	1	10	2.67549	kinase with adenine nucleotide alpha hydrolases-like domain-containing protein		PF00582,PF07714	PTHR27003,PTHR27003:SF80	KOG1187	GO:0006950,GO:0006468,GO:0004672	LOC_Os06g09230.2	serine threonine kinase, putative, expressed
AT1G16770.1	5	14	5	14	1.44505	hypothetical protein			PTHR34776,PTHR34776:SF1			LOC_Os02g04780.1	expressed protein
AT1G16780.1	18	15	17	15	-0.209036	Inorganic H pyrophosphatase family protein	VHP2;2	PF03030	PTHR31998,PTHR31998:SF11		GO:0016020,GO:0015992,GO:0009678,GO:0004427	LOC_Os02g33490.1	inorganic H+ pyrophosphatase, putative, expressed
AT1G16790.1	79	71	79	71	-0.150935	ribosomal protein-like protein
AT1G16800.2	100	85	99	85	-0.229585	P-loop containing nucleoside triphosphate hydrolases superfamily protein		PF13245,PF13087	PTHR10887,PTHR10887:SF140	KOG1801		LOC_Os06g20500.1	tRNA-splicing endonuclease positive effector-related, putative, expressed
AT1G16810.1	31	48	31	48	0.644707	7-dehydrocholesterol reductase-like protein		PF08555	PTHR13282,PTHR13282:SF6	KOG3410		LOC_Os02g49530.2	AGAP000425-PA, putative, expressed
AT1G16820.1	17	25	16	25	0.61236	vacuolar ATP synthase catalytic subunit-related / V-ATPase-related / vacuolar proton pump-like protein			PTHR34892			LOC_Os06g45120.1	ATP synthase, putative, expressed
AT1G16825.1	69	54	69	54	-0.340439	Reticulon family protein		PF02453				LOC_Os08g12850.1	pentatricopeptide, putative, expressed
AT1G16830.1	18	21	18	21	0.23592	Pentatricopeptide repeat (PPR) superfamily protein		PF01535,PF13041	PTHR24015,PTHR24015:SF466			LOC_Os10g42760.1	PPR repeat domain containing protein, putative, expressed
AT1G16840.1	264	316	262	317	0.275515	hypothetical protein			PTHR33972,PTHR33972:SF2			LOC_Os04g51770.1	expressed protein
AT1G16850.1	16	23	16	23	0.537024	transmembrane protein			PTHR35463,PTHR35463:SF1
AT1G16860.1	884	838	879	841	-0.062885	Ubiquitin-specific protease family C19-related protein			PTHR33709,PTHR33709:SF3			LOC_Os08g13350.1	expressed protein
AT1G16870.1	269	292	268	293	0.129356	mitochondrial 28S ribosomal protein S29-like protein		PF10236	PTHR12810,PTHR12810:SF0			LOC_Os07g10300.2	expressed protein
AT1G16880.1	2447	2085	2433	2093	-0.217529	uridylyltransferase-like protein	ACR11		PTHR31096,PTHR31096:SF16			LOC_Os08g14440.1	uridylyltransferase-related, putative, expressed
AT1G16890.3	674	802	670	805	0.265422	ubiquitin-conjugating enzyme 36	UBC36	PF00179	PTHR24067,PTHR24067:SF159	KOG0417		LOC_Os01g48280.1	ubiquitin-conjugating enzyme, putative, expressed
AT1G16900.1	359	296	357	297	-0.262928	Alg9-like mannosyltransferase family	EBS3	PF03901	PTHR22760,PTHR22760:SF2		GO:0016757	LOC_Os01g11070.1	Alg9-like mannosyltransferase protein, putative, expressed
AT1G16916.2	43	55	43	55	0.35533	transmembrane protein
AT1G16920.1	358	468	356	470	0.399999	RAB GTPase homolog A1B	RABA1b	PF00025	PTHR24073,PTHR24073:SF592	KOG0087	GO:0005525	LOC_Os06g35814.1	ras-related protein, putative, expressed
AT1G16930.1	23	17	22	17	-0.433907	F-box/RNI-like/FBD-like domains-containing protein		PF00646,PF07723,PF08387	PTHR32212,PTHR32212:SF126		GO:0005515	LOC_Os04g19750.1	OsFBL11 - F-box domain and LRR containing protein, expressed
AT1G16950.1	6	4	6	4	-0.5715	transmembrane protein			PTHR37180,PTHR37180:SF1
AT1G16960.1	78	75	77	75	-0.0435078	Ubiquitin domain-containing protein		PF16455	PTHR13609			LOC_Os09g17620.1	ubiquitin domain-containing protein 2, putative, expressed
AT1G16970.1	159	112	158	112	-0.492144	ATP-dependent DNA helicase 2 subunit Ku70-like protein	KU70	PF02037,PF03730,PF02735,PF03731	PTHR12604,PTHR12604:SF2	KOG2327	GO:0006303,GO:0004003,GO:0003677,GO:0043564,GO:0042162,GO:0005634,GO:0003684,GO:0000723	LOC_Os07g08729.1	ATP-dependent DNA helicase 2 subunit 1, putative, expressed
AT1G16980.1	81	60	80	60	-0.410777	trehalose-6-phosphate synthase	TPS2	PF02358,PF00982	PTHR10788,PTHR10788:SF6		GO:0005992,GO:0003824	LOC_Os05g44210.1	trehalose-6-phosphate synthase, putative, expressed
AT1G17000.1	5	6	5	6	0.151483	trehalose-phosphatase/synthase 3	TPS3	PF02358,PF00982	PTHR10788,PTHR10788:SF6		GO:0005992,GO:0003824	LOC_Os05g44210.1	trehalose-6-phosphate synthase, putative, expressed
AT1G17020.1	13	11	13	11	-0.227546	senescence-related gene 1	SRG1	PF14226,PF03171	PTHR10209,PTHR10209:SF168	KOG0143	GO:0055114,GO:0016491	LOC_Os01g24980.1	naringenin,2-oxoglutarate 3-dioxygenase, putative, expressed
AT1G17030.1	25	28	24	28	0.206538	hypothetical protein			PTHR33916,PTHR33916:SF1			LOC_Os05g19030.2	expressed protein
AT1G17040.2	122	75	121	75	-0.69225	SH2 domain protein A	SHA	PF13385	PTHR11801		GO:0007165,GO:0006355,GO:0005634,GO:0004871,GO:0003700	LOC_Os10g41770.1	expressed protein
AT1G17050.1	392	207	389	208	-0.90596	solanesyl diphosphate synthase 2	SPS2	PF00348	PTHR12001,PTHR12001:SF18	KOG0776	GO:0008299,GO:0016765,GO:0015979	LOC_Os05g50550.1	polyprenyl synthetase, putative, expressed
AT1G17060.1	17	33	16	33	1.0134	cytochrome p450 72c1	CYP72C1	PF00067	PTHR24282,PTHR24282:SF29		GO:0055114,GO:0020037,GO:0016705,GO:0005506	LOC_Os01g43710.1	cytochrome P450 72A1, putative, expressed
AT1G17065.1	14	30	14	30	1.08846	hypothetical protein
AT1G17070.1	255	226	253	227	-0.157963	GC-rich sequence DNA-binding factor-like protein with Tuftelin interacting domain-containing protein	STIPL1	PF01585,PF12457,PF07842	PTHR23329,PTHR23329:SF1		GO:0003676,GO:0006355,GO:0005634,GO:0003677	LOC_Os12g42140.1	G-patch domain containing protein, putative, expressed
AT1G17080.1	327	347	325	348	0.099193	Ribosomal protein L18ae family			PTHR10052,PTHR10052:SF9			LOC_Os05g49020.1	60S ribosomal protein L18a-1, putative, expressed
AT1G17090.1	23	18	23	18	-0.340175	transmembrane protein
AT1G17100.1	1220	674	1213	676	-0.843736	SOUL heme-binding family protein	HBP1	PF04832	PTHR11220,PTHR11220:SF25			LOC_Os01g11230.1	SOUL heme-binding protein, putative, expressed
AT1G17110.2	601	552	597	554	-0.108008	ubiquitin-specific protease 15	UBP15	PF01753,PF13423	PTHR24006,PTHR24006:SF503			LOC_Os02g14730.1	ubiquitin carboxyl-terminal hydrolase family protein, expressed
AT1G17120.1	297	267	295	268	-0.140465	cationic amino acid transporter 8	CAT8	PF13906,PF00324	PTHR11785,PTHR11785:SF273	KOG1286	GO:0055085,GO:0016020,GO:0006810,GO:0015171,GO:0003333	LOC_Os01g11160.1	amino acid permease family protein, putative, expressed
AT1G17130.2	373	433	371	434	0.228861	coiled-coil protein (DUF572)		PF04502	PTHR12111,PTHR12111:SF1	KOG2989		LOC_Os01g40610.1	coiled-coil domain-containing protein, putative, expressed
AT1G17140.1	13	13	13	13	-0.0438041	interactor of constitutive active rops 1	ICR1		PTHR34224,PTHR34224:SF2	KOG1003		LOC_Os01g55280.1	expressed protein
AT1G17145.1	55	73	54	73	0.435253	RING/U-box superfamily protein			PTHR31315,PTHR31315:SF2	KOG2789		LOC_Os02g14720.1	expressed protein
AT1G17150.1	8	3	7	3	-1.57289	Pectin lyase-like superfamily protein		PF00295	PTHR31375,PTHR31375:SF10		GO:0005975,GO:0004650	LOC_Os06g35320.1	polygalacturonase, putative, expressed
AT1G17160.1	173	157	172	158	-0.122237	pfkB-like carbohydrate kinase family protein		PF08543	PTHR10584,PTHR10584:SF166	KOG2855		LOC_Os01g47550.1	kinase, pfkB family, putative, expressed
AT1G17170.1	16	12	16	12	-0.401575	glutathione S-transferase TAU 24	GSTU24	PF13410,PF13417	PTHR11260,PTHR11260:SF204	KOG0406	GO:0005515	LOC_Os09g20220.1	glutathione S-transferase, putative, expressed
AT1G17190.1	58	73	57	73	0.347874	glutathione S-transferase tau 26	GSTU26	PF13410,PF13417	PTHR11260,PTHR11260:SF204	KOG0406	GO:0005515	LOC_Os09g20220.1	glutathione S-transferase, putative, expressed
AT1G17200.1	1112	1120	1106	1124	0.0237844	Uncharacterized protein family (UPF0497)		PF04535	PTHR11615,PTHR11615:SF151			LOC_Os04g21320.1	membrane associated DUF588 domain containing protein, putative, expressed
AT1G17210.1	1028	829	1022	832	-0.296251	IAP-like protein 1	ILP1	PF07967	PTHR15835,PTHR15835:SF6	KOG4765	GO:0008270,GO:0005634	LOC_Os03g57160.1	zinc ion binding protein, putative, expressed
AT1G17220.1	3341	2085	3323	2093	-0.66678	Translation initiation factor 2, small GTP-binding protein	FUG1	PF01926,PF11987	PTHR23115,PTHR23115:SF138		GO:0005525	LOC_Os05g49970.2	translation initiation factor IF-2, chloroplast precursor, putative, expressed
AT1G17230.2	171	165	170	166	-0.0380118	Leucine-rich receptor-like protein kinase family protein		PF00560,PF08263,PF13855,PF00069	PTHR27000,PTHR27000:SF68	KOG1187	GO:0005515,GO:0006468,GO:0005524,GO:0004672	LOC_Os07g05740.2	receptor-like protein kinase 2 precursor, putative, expressed
AT1G17240.2	14	9	13	9	-0.571363	receptor like protein 2	RLP2	PF08263,PF00560	PTHR27000,PTHR27000:SF208	KOG0472	GO:0005515	LOC_Os06g47650.1	phytosulfokine receptor precursor, putative, expressed
AT1G17250.1	122	88	121	88	-0.46003	receptor like protein 3	RLP3	PF08263,PF13855	PTHR27000,PTHR27000:SF208	KOG0472	GO:0005515	LOC_Os02g05930.1	phytosulfokine receptor precursor, putative, expressed
AT1G17260.1	1711	1367	1701	1372	-0.310506	autoinhibited H[+]-ATPase isoform 10	AHA10	PF00690,PF00702,PF00122	PTHR24093,PTHR24093:SF355		GO:0046872,GO:0000166	LOC_Os03g08560.1	plasma membrane ATPase, putative, expressed
AT1G17270.1	88	64	87	64	-0.438041	O-fucosyltransferase family protein		PF10250	PTHR13398			LOC_Os07g38490.1	GDP-fucose protein-O-fucosyltransferase 2, putative, expressed
AT1G17280.4	54	48	53	48	-0.143383	ubiquitin-conjugating enzyme 34	UBC34	PF00179	PTHR24067,PTHR24067:SF42	KOG0894		LOC_Os06g09330.1	ubiquitin-conjugating enzyme, putative, expressed
AT1G17290.1	1228	1561	1221	1567	0.359743	alanine aminotransferas	AlaAT1	PF00155	PTHR11751,PTHR11751:SF369		GO:0030170,GO:0009058	LOC_Os07g42600.1	aminotransferase, classes I and II, domain containing protein, expressed
AT1G17330.1	84	96	84	96	0.198767	Metal-dependent phosphohydrolase		PF01966	PTHR33594,PTHR33594:SF1			LOC_Os10g34470.1	HD domain containing protein 2, putative, expressed
AT1G17340.1	141	135	140	135	-0.0492399	Phosphoinositide phosphatase family protein		PF02383	PTHR11200,PTHR11200:SF122	KOG1889	GO:0042578,GO:0036092,GO:0007033	LOC_Os03g08430.1	SAC domain containing protein, putative, expressed
AT1G17350.2	84	88	83	88	0.0813108	NADH:ubiquinone oxidoreductase intermediate-associated protein 30		PF08547	PTHR13194			LOC_Os01g52720.1	Complex I intermediate-associated protein 30 domain containing protein, putative, expressed
AT1G17360.1	577	710	573	712	0.312981	LOW protein: protein phosphatase 1 regulatory subunit-like protein			PTHR31008,PTHR31008:SF3			LOC_Os07g42410.1	expressed protein
AT1G17370.1	778	728	773	731	-0.0813814	oligouridylate binding protein 1B	UBP1B	PF00076	PTHR24012,PTHR24012:SF379	KOG0148	GO:0003676	LOC_Os11g40510.1	RNA recognition motif containing protein, putative, expressed
AT1G17380.1	21	15	20	15	-0.486576	jasmonate-zim-domain protein 5	JAZ5	PF09425,PF06200	PTHR33077,PTHR33077:SF13			LOC_Os07g42370.1	zinc-finger protein, putative, expressed
AT1G17410.1	22	25	21	25	0.202342	Nucleoside diphosphate kinase family protein		PF00334	PTHR11349	KOG0888	GO:0006241,GO:0006228,GO:0006183,GO:0006165,GO:0004550	LOC_Os02g35700.1	nucleoside diphosphate kinase, putative, expressed
AT1G17420.1	224	264	223	265	0.25054	lipoxygenase 3	LOX3	PF01477,PF00305	PTHR11771,PTHR11771:SF38		GO:0005515,GO:0055114,GO:0046872,GO:0016702	LOC_Os03g08220.1	lipoxygenase protein, putative, expressed
AT1G17430.1	153	201	152	201	0.403377	alpha/beta-Hydrolases superfamily protein		PF12695	PTHR10992,PTHR10992:SF828	KOG1454		LOC_Os03g08110.1	hydrolase protein, putative, expressed
AT1G17440.1	279	247	278	248	-0.162263	Transcription initiation factor TFIID subunit A	EER4	PF03847	PTHR12264,PTHR12264:SF3	KOG1142	GO:0006352,GO:0005669	LOC_Os01g62820.3	Transcription initiation factor TFIID subunit A containing protein, expressed
AT1G17450.2	31	42	30	42	0.47486	B-block binding subunit of TFIIIC		PF04182	PTHR15180,PTHR15180:SF1			LOC_Os02g42200.1	transcription factor-related, putative, expressed
AT1G17455.1	25	51	24	51	1.05691	ELF4-like 4	ELF4-L4	PF07011	PTHR33469,PTHR33469:SF3			LOC_Os11g40610.4	EARLY flowering protein, putative, expressed
AT1G17460.2	22	23	22	23	0.0458418	TRF-like 3	TRFL3	PF00249	PTHR21717,PTHR21717:SF25			LOC_Os02g53670.1	MYB family transcription factor, putative, expressed
AT1G17470.1	140	155	139	155	0.15584	developmentally regulated G-protein 1	DRG1	PF01926,PF02824,PF16897	PTHR11702,PTHR11702:SF26		GO:0005525	LOC_Os05g28940.1	GTP-binding protein, putative, expressed
AT1G17480.1	24	46	23	46	0.966527	IQ-domain 7	IQD7	PF00612	PTHR32295,PTHR32295:SF25		GO:0005515	LOC_Os01g09790.1	IQ calmodulin-binding motif domain containing protein, expressed
AT1G17490.1	109	130	108	130	0.268627	epidermal patterning factor-like protein			PTHR35277			LOC_Os09g19910.1	expressed protein
AT1G17500.1	118	115	117	115	-0.0238236	ATPase E1-E2 type family protein / haloacid dehalogenase-like hydrolase family protein		PF12710,PF16209,PF16212	PTHR24092,PTHR24092:SF55		GO:0016021,GO:0015914,GO:0005524,GO:0004012,GO:0000287	LOC_Os06g36990.1	phospholipid-transporting ATPase 4, putative, expressed
AT1G17510.1	82	98	82	98	0.270607	hypothetical protein
AT1G17520.2	115	132	114	133	0.218583	Homeodomain-like/winged-helix DNA-binding family protein		PF13921,PF00538	PTHR21717,PTHR21717:SF17		GO:0006334,GO:0005634,GO:0003677,GO:0000786	LOC_Os01g51154.1	single myb histone, putative, expressed
AT1G17530.1	250	250	249	251	0.0134089	translocase of inner mitochondrial membrane 23	TIM23-1	PF02466	PTHR15371,PTHR15371:SF7	KOG3324		LOC_Os03g02390.1	mitochondrial import inner membrane translocase subunit Tim17, putative, expressed
AT1G17540.1	88	88	87	88	0.0216617	kinase with adenine nucleotide alpha hydrolases-like domain-containing protein		PF00582,PF07714	PTHR27003,PTHR27003:SF118	KOG1187	GO:0006950,GO:0006468,GO:0004672	LOC_Os02g12660.1	protein kinase domain containing protein, putative, expressed
AT1G17550.1	369	314	367	315	-0.221724	homology to ABI2	HAB2	PF00481	PTHR13832,PTHR13832:SF335	KOG0698	GO:0003824,GO:0006470,GO:0004722	LOC_Os01g40094.1	protein phosphatase 2C, putative, expressed
AT1G17560.1	125	152	124	153	0.301433	Ribosomal protein L14p/L23e family protein	HLL	PF00238	PTHR11761,PTHR11761:SF12	KOG0901	GO:0006412,GO:0005840,GO:0003735	LOC_Os12g42180.1	ribosomal protein, putative, expressed
AT1G17580.1	328	263	326	264	-0.303032	myosin 1	MYA1	PF02736,PF00612,PF01843,PF00063	PTHR13140,PTHR13140:SF440		GO:0016459,GO:0005524,GO:0003774,GO:0005515	LOC_Os03g48140.1	myosin, putative, expressed
AT1G17590.1	92	128	91	128	0.492495	nuclear factor Y, subunit A8	NF-YA8	PF02045	PTHR12632,PTHR12632:SF12	KOG1561	GO:0006355,GO:0003700	LOC_Os03g07880.1	nuclear transcription factor Y subunit, putative, expressed
AT1G17600.1	18	27	18	27	0.598214	Disease resistance protein (TIR-NBS-LRR class) family		PF07725,PF13676,PF00931	PTHR11017,PTHR11017:SF169	KOG4658	GO:0007165,GO:0005515,GO:0043531	LOC_Os08g12740.2	disease resistance protein RGA3, putative, expressed
AT1G17610.1	9	9	8	9	0.0129096	Disease resistance protein (TIR-NBS class)		PF01582,PF00931	PTHR11017,PTHR11017:SF169		GO:0007165,GO:0005515,GO:0043531	LOC_Os05g41310.1	disease resistance protein RGA2, putative, expressed
AT1G17620.1	2450	3263	2437	3275	0.426564	Late embryogenesis abundant (LEA) hydroxyproline-rich glycoprotein family		PF03168	PTHR31234,PTHR31234:SF2			LOC_Os01g39290.1	harpin-induced protein 1 domain containing protein, expressed
AT1G17630.1	22	16	21	16	-0.458703	Pentatricopeptide repeat (PPR-like) superfamily protein		PF13041,PF01535	PTHR24015,PTHR24015:SF617			LOC_Os01g10090.1	pentatricopeptide, putative, expressed
AT1G17640.1	45	54	45	54	0.263081	RNA-binding (RRM/RBD/RNP motifs) family protein		PF00076	PTHR24012,PTHR24012:SF318	KOG0131	GO:0003676	LOC_Os02g12850.1	RNA recognition motif containing protein, expressed
AT1G17650.1	157	185	156	186	0.250249	glyoxylate reductase 2	GLYR2	PF02558,PF14833	PTHR22981,PTHR22981:SF53	KOG0409	GO:0055114,GO:0008677,GO:0051287	LOC_Os01g39270.1	NAD binding domain of 6-phosphogluconate dehydrogenase containing protein, expressed
AT1G17665.1	2	6	2	6	1.59842	CA-responsive protein			PTHR35991,PTHR35991:SF1			LOC_Os01g10080.2	expressed protein
AT1G17680.1	261	217	259	217	-0.253517	tetratricopeptide repeat (TPR)-containing protein		PF13176,PF13414,PF14559	PTHR23082		GO:0005515	LOC_Os11g16540.1	tetratricopeptide repeat domain containing protein, expressed
AT1G17690.1	165	151	164	152	-0.114403	U3 small nucleolar RNA-associated protein	NOF1	PF06862	PTHR12933	KOG2340	GO:0005634	LOC_Os05g22920.1	digestive organ expansion factor, putative, expressed
AT1G17700.1	10	3	10	3	-1.72387	prenylated RAB acceptor 1.F1	PRA1.F1	PF03208	PTHR19317,PTHR19317:SF2	KOG3142		LOC_Os05g11120.1	prenylated rab acceptor, putative, expressed
AT1G17710.1	11	8	10	8	-0.379032	Pyridoxal phosphate phosphatase-related protein	PEPC1	PF06888	PTHR20889,PTHR20889:SF4	KOG3120	GO:0016791,GO:0008152	LOC_Os01g52230.1	phosphoethanolamine/phosphocholine phosphatase, putative, expressed
AT1G17720.1	871	851	866	854	-0.0200428	Protein phosphatase 2A, regulatory subunit PR55	ATB BETA	PF00400	PTHR11871,PTHR11871:SF11		GO:0005515,GO:0008601,GO:0000159	LOC_Os02g13110.2	serine/threonine protein phosphatase 2A 55 kDa regulatory subunit B, putative, expressed
AT1G17730.1	320	347	318	348	0.130263	vacuolar protein sorting 46.1	VPS46.1	PF03357	PTHR10476,PTHR10476:SF11	KOG3232	GO:0007034	LOC_Os06g43590.3	SNF7 domain containing protein, putative, expressed
AT1G17744.1	1019	459	1014	460	-1.13869	hypothetical protein
AT1G17745.2	3978	2451	3957	2461	-0.685191	D-3-phosphoglycerate dehydrogenase	PGDH	PF07991,PF01842,PF00389	PTHR10996,PTHR10996:SF159		GO:0016597,GO:0008152,GO:0055114,GO:0051287,GO:0016616	LOC_Os06g44460.1	D-3-phosphoglycerate dehydrogenase, chloroplast precursor, putative, expressed
AT1G17750.1	124	140	123	141	0.194596	PEP1 receptor 2	PEPR2	PF08263,PF00560,PF00069	PTHR27000,PTHR27000:SF185	KOG1187	GO:0005515,GO:0006468,GO:0005524,GO:0004672	LOC_Os08g34640.1	receptor-like protein kinase precursor, putative, expressed
AT1G17760.1	246	268	244	269	0.139968	Tetratricopeptide repeat (TPR)-like superfamily protein	CSTF77	PF13428,PF05843	PTHR19980	KOG1914	GO:0006397,GO:0005634	LOC_Os12g38380.1	tetratricopeptide repeat containing protein, putative, expressed
AT1G17770.1	36	21	36	21	-0.798946	histone-lysine N-methyltransferase, H3 lysine-9 specific SUVH3-like protein	SUVH7	PF05033,PF00856,PF02182	PTHR22884,PTHR22884:SF383	KOG1082	GO:0034968,GO:0018024,GO:0008270,GO:0005634,GO:0005515,GO:0042393	LOC_Os11g38900.1	histone-lysine N-methyltransferase, H3 lysine-9 specific SUVH1, putative, expressed
AT1G17780.2	24	38	24	38	0.658307	transmembrane protein			PTHR34659,PTHR34659:SF1
AT1G17790.1	85	97	84	97	0.212474	DNA-binding bromodomain-containing protein		PF00439,PF17035	PTHR22880,PTHR22880:SF172	KOG1474	GO:0005515	LOC_Os02g15220.4	bromodomain containing protein, expressed
AT1G17800.1	105	129	104	129	0.31183	early nodulin-like protein 22	ENODL22	PF02298	PTHR33021,PTHR33021:SF40		GO:0009055	LOC_Os03g50160.1	plastocyanin-like domain containing protein, putative, expressed
AT1G17810.1	20	8	20	8	-1.30828	beta-tonoplast intrinsic protein	BETA-TIP	PF00230	PTHR19139,PTHR19139:SF30	KOG0223	GO:0016020,GO:0006810,GO:0005215	LOC_Os10g35050.1	aquaporin protein, putative, expressed
AT1G17820.1	194	165	193	166	-0.220178	testis-expressed sequence 2-like protein (DUF2404)			PTHR13466,PTHR13466:SF0			LOC_Os02g58110.1	expressed protein
AT1G17830.1	28	28	27	28	0.0134984	hypothetical protein (DUF789)		PF05623	PTHR31343,PTHR31343:SF7			LOC_Os10g35150.1	expressed protein
AT1G17840.1	4100	3606	4078	3620	-0.171937	white-brown complex-like protein	ABCG11	PF00005,PF01061	PTHR19241,PTHR19241:SF271		GO:0016887,GO:0005524,GO:0016020	LOC_Os10g35180.1	white-brown complex homolog protein 11, putative, expressed
AT1G17850.2	479	558	476	560	0.233837	Rhodanese/Cell cycle control phosphatase superfamily protein		PF00581,PF12368	PTHR22778,PTHR22778:SF18			LOC_Os03g64350.1	rhodanese-like domain containing protein, putative, expressed
AT1G17860.1	49	67	49	67	0.454324	Kunitz family trypsin and protease inhibitor protein		PF00197	PTHR33107		GO:0004866	LOC_Os04g44470.1	KUN1 - Kunitz-type trypsin inhibitor precursor, expressed
AT1G17870.1	66	74	66	74	0.178829	ethylene-dependent gravitropism-deficient and yellow-green-like 3	EGY3		PTHR31412,PTHR31412:SF2			LOC_Os03g51920.1	peptidase, M50 family, putative, expressed
AT1G17880.1	1395	1702	1387	1709	0.300928	basic transcription factor 3	BTF3	PF01849	PTHR10351	KOG2240		LOC_Os03g63400.1	transcription factor BTF3, putative, expressed
AT1G17890.1	367	396	365	398	0.123256	NAD(P)-binding Rossmann-fold superfamily protein	GER2	PF16363	PTHR10366,PTHR10366:SF246			LOC_Os06g44270.1	synthase, putative, expressed
AT1G17920.1	7	8	6	8	0.313878	homeodomain GLABROUS 12	HDG12	PF00046,PF01852	PTHR24326,PTHR24326:SF236	KOG0484	GO:0003677,GO:0008289	LOC_Os06g10600.1	homeobox and START domains containing protein, putative, expressed
AT1G17930.1	15	10	15	10	-0.646646	Aminotransferase-like, plant mobile domain family protein		PF10536	PTHR31973			LOC_Os07g32406.1	expressed protein
AT1G17950.1	18	7	17	7	-1.30836	myb domain protein 52	MYB52	PF00249	PTHR10641,PTHR10641:SF665			LOC_Os03g51110.1	MYB family transcription factor, putative, expressed
AT1G17960.1	9	10	9	10	0.164073	Threonyl-tRNA synthetase		PF02824,PF03129,PF00587	PTHR11451,PTHR11451:SF5		GO:0006418,GO:0005524,GO:0004812,GO:0000166	LOC_Os08g19850.1	threonyl-tRNA synthetase, mitochondrial precursor, putative, expressed
AT1G17970.1	57	56	57	56	-0.0248206	RING/U-box superfamily protein		PF13639	PTHR22937,PTHR22937:SF18		GO:0008270,GO:0005515	LOC_Os01g49770.1	zinc finger, C3HC4 type domain containing protein, expressed
AT1G17980.1	85	106	85	106	0.324928	poly(A) polymerase 1	PAPS1	PF01909,PF04926,PF04928	PTHR10682,PTHR10682:SF10		GO:0016779,GO:0043631,GO:0003723,GO:0004652,GO:0005634	LOC_Os06g21470.1	expressed protein
AT1G17990.1	155	386	154	388	1.32974	FMN-linked oxidoreductases superfamily protein		PF00724	PTHR22893,PTHR22893:SF44		GO:0055114,GO:0016491,GO:0010181	LOC_Os06g11280.1	12-oxophytodienoate reductase, putative, expressed
AT1G18000.1	363	421	361	422	0.227616	Major facilitator superfamily protein		PF05978	PTHR23294,PTHR23294:SF25	KOG3098		LOC_Os04g01520.1	expressed protein
AT1G18010.1	347	413	345	414	0.262859	Major facilitator superfamily protein		PF05978	PTHR23294,PTHR23294:SF25	KOG3098		LOC_Os04g01520.1	expressed protein
AT1G18020.1	173	401	172	403	1.23066	FMN-linked oxidoreductases superfamily protein		PF00724	PTHR22893,PTHR22893:SF44		GO:0055114,GO:0016491,GO:0010181	LOC_Os06g11280.1	12-oxophytodienoate reductase, putative, expressed
AT1G18030.1	94	140	93	140	0.590648	Protein phosphatase 2C family protein		PF00481	PTHR13832,PTHR13832:SF355	KOG0698	GO:0003824,GO:0006470,GO:0004722	LOC_Os09g14540.1	protein phosphatase 2C, putative, expressed
AT1G18040.1	149	137	148	137	-0.11302	cyclin-dependent kinase D1;3	CDKD1;3	PF00069	PTHR24056,PTHR24056:SF0		GO:0006468,GO:0005524,GO:0004672	LOC_Os05g32600.1	cyclin-dependent kinase D-1, putative, expressed
AT1G18060.1	870	845	865	848	-0.028685	microbial collagenase			PTHR35690,PTHR35690:SF1			LOC_Os01g03040.1	expressed protein
AT1G18070.3	1519	1643	1510	1649	0.126699	Translation elongation factor EF1A/initiation factor IF2gamma family protein		PF03144,PF03143,PF00009	PTHR23115,PTHR23115:SF133		GO:0005525	LOC_Os04g20220.1	elongation factor Tu, putative, expressed
AT1G18080.1	4678	4840	4653	4859	0.062415	Transducin/WD40 repeat-like superfamily protein	ATARCA	PF00400	PTHR19868,PTHR19868:SF0		GO:0005515	LOC_Os01g49290.1	WD repeat-containing protein, putative, expressed
AT1G18090.1	15	14	14	14	-0.0901357	5'-3' exonuclease family protein		PF00752,PF00867	PTHR11081,PTHR11081:SF27		GO:0006281,GO:0004518	LOC_Os01g56940.1	flap endonuclease, putative, expressed
AT1G18100.1	52	47	52	47	-0.148053	PEBP (phosphatidylethanolamine-binding protein) family protein	E12A11	PF01161	PTHR11362,PTHR11362:SF38	KOG3346		LOC_Os06g30370.1	osMFT1 MFT-Like1 homologous to Mother of FT and TFL1 gene; contains Pfam profile PF01161: Phosphatidylethanolamine-binding protein, expressed
AT1G18150.1	83	53	82	53	-0.639016	Protein kinase superfamily protein	ATMPK8	PF00069	PTHR24055,PTHR24055:SF211		GO:0006468,GO:0005524,GO:0004672	LOC_Os06g49430.1	CGMC_MAPKCMGC_2.11 - CGMC includes CDA, MAPK, GSK3, and CLKC kinases, expressed
AT1G18160.1	525	478	522	480	-0.121835	Protein kinase superfamily protein		PF07714,PF14381	PTHR23257,PTHR23257:SF466	KOG0192	GO:0006468,GO:0004672	LOC_Os06g12590.1	protein kinase, putative, expressed
AT1G18170.1	272	238	271	238	-0.182171	FKBP-like peptidyl-prolyl cis-trans isomerase family protein		PF00254	PTHR10516,PTHR10516:SF308	KOG0552	GO:0006457	LOC_Os03g50080.1	peptidyl-prolyl cis-trans isomerase, FKBP-type, putative, expressed
AT1G18180.1	140	160	139	161	0.211407	3-oxo-5-alpha-steroid 4-dehydrogenase (DUF1295)		PF06966	PTHR32251,PTHR32251:SF15	KOG4650		LOC_Os03g50070.1	DUF1295 domain containing protein, putative, expressed
AT1G18190.1	350	371	348	372	0.0955685	golgin Putative 2	GC2		PTHR13815,PTHR13815:SF6			LOC_Os04g55810.1	expressed protein
AT1G18193.1	49	38	49	38	-0.35309	hypothetical protein
AT1G18197.2	8	2	8	2	-1.98654	GCK domain protein		PF07802
AT1G18200.1	9	14	9	14	0.598214	Rab GTPase-like A1I protein	RABA6b	PF00025	PTHR24073,PTHR24073:SF486	KOG0087	GO:0005525	LOC_Os03g60870.1	ras-related protein, putative, expressed
AT1G18210.1	761	1246	757	1250	0.72426	Calcium-binding EF-hand family protein		PF13833,PF13499	PTHR10891,PTHR10891:SF573	KOG0027		LOC_Os05g13580.1	OsCML18 - Calmodulin-related calcium sensor protein, expressed
AT1G18250.2	273	311	271	312	0.2016	Pathogenesis-related thaumatin superfamily protein	ATLP-1	PF00314	PTHR31048			LOC_Os06g47600.1	thaumatin family domain containing protein, expressed
AT1G18260.1	691	625	687	627	-0.131478	HCP-like superfamily protein	EBS5	PF08238	PTHR11102,PTHR11102:SF84	KOG1550		LOC_Os03g15350.1	Sel1 repeat domain containing protein, putative, expressed
AT1G18265.1	15	12	15	12	-0.308219	zein-binding protein (Protein of unknown function, DUF593)		PF04576	PTHR31422,PTHR31422:SF2			LOC_Os03g15410.1	expressed protein
AT1G18270.3	419	349	416	350	-0.250649	ketose-bisphosphate aldolase class-II family protein		PF17042,PF14833,PF03446,PF07005,PF01116	PTHR22981,PTHR22981:SF27	KOG0409	GO:0051287,GO:0055114,GO:0004616,GO:0016832,GO:0008270,GO:0005975	LOC_Os06g14740.1	NAD binding domain of 6-phosphogluconate dehydrogenase containing protein, expressed
AT1G18280.1	8	6	7	6	-0.309167	Bifunctional inhibitor/lipid-transfer protein/seed storage 2S albumin superfamily protein		PF14368	PTHR33044,PTHR33044:SF11			LOC_Os06g47200.1	LTPL85 - Protease inhibitor/seed storage/LTP family protein precursor, expressed
AT1G18300.1	198	133	196	134	-0.557035	nudix hydrolase homolog 4	NUDT4	PF00293	PTHR12629,PTHR12629:SF15	KOG2839	GO:0016787	LOC_Os02g50130.1	hydrolase, NUDIX family, domain containing protein, expressed
AT1G18320.1	29	25	28	25	-0.205131	Mitochondrial import inner membrane translocase subunit Tim17/Tim22/Tim23 family protein		PF02466	PTHR14110	KOG3225		LOC_Os03g18500.1	mitochondrial import inner membrane translocase subunit Tim17, putative, expressed
AT1G18330.2	211	160	210	160	-0.390261	Homeodomain-like superfamily protein	EPR1	PF00249	PTHR12802,PTHR12802:SF37	KOG0724		LOC_Os06g51260.1	MYB family transcription factor, putative, expressed
AT1G18335.2	53	38	53	38	-0.485366	Acyl-CoA N-acyltransferases (NAT) superfamily protein		PF00583	PTHR20531,PTHR20531:SF1	KOG2488	GO:0008080	LOC_Os05g32180.1	acetyltransferase, GNAT family, putative, expressed
AT1G18340.1	99	111	98	111	0.185565	basal transcription factor complex subunit-like protein		PF03850	PTHR12831,PTHR12831:SF0	KOG2487	GO:0006355,GO:0006289,GO:0000439	LOC_Os02g03340.1	RNA polymerase II transcription factor B subunit 4, putative, expressed
AT1G18350.1	8	5	8	5	-0.665073	MAP kinase kinase 7	MKK7	PF00069	PTHR24361,PTHR24361:SF344	KOG0581	GO:0006468,GO:0005524,GO:0004672	LOC_Os06g09180.1	OsMKK5 - putative MAPKK based on amino acid sequence homology, expressed
AT1G18360.1	303	276	301	277	-0.121228	alpha/beta-Hydrolases superfamily protein		PF12695	PTHR11614,PTHR11614:SF96	KOG1455		LOC_Os09g23150.1	monoglyceride lipase, putative, expressed
AT1G18370.1	172	178	171	179	0.0628886	ATP binding microtubule motor family protein	HIK	PF11995,PF00225	PTHR24115,PTHR24115:SF522		GO:0008017,GO:0007018,GO:0005524,GO:0003777,GO:0005871	LOC_Os01g33040.1	kinesin motor domain containing protein, expressed
AT1G18390.2	10	10	10	10	0.0134623	Serine/Threonine kinase family catalytic domain protein		PF13947,PF14380,PF07714	PTHR27005,PTHR27005:SF31	KOG1187	GO:0030247,GO:0006468,GO:0004672	LOC_Os01g49529.1	OsWAK10d - OsWAK receptor-like cytoplasmic kinase OsWAK-RLCK, expressed
AT1G18400.1	21	26	20	26	0.328357	BR enhanced expression 1	BEE1	PF00010	PTHR12565,PTHR12565:SF94		GO:0046983	LOC_Os08g42470.1	BEE 1, putative, expressed
AT1G18410.4	6	9	5	9	0.644177	P-loop containing nucleoside triphosphate hydrolases superfamily protein		PF00225	PTHR24115,PTHR24115:SF474	KOG0239	GO:0008017,GO:0007018,GO:0005524,GO:0003777,GO:0005871	LOC_Os06g36080.1	kinesin motor domain containing protein, expressed
AT1G18420.1	58	84	57	84	0.551671	aluminum activated malate transporter family protein		PF11744	PTHR31086,PTHR31086:SF20		GO:0015743	LOC_Os02g49790.1	aluminum-activated malate transporter, putative, expressed
AT1G18440.1	131	113	130	113	-0.19982	Peptidyl-tRNA hydrolase family protein		PF01195	PTHR17224,PTHR17224:SF5	KOG2255	GO:0004045	LOC_Os01g49900.1	peptidyl-tRNA hydrolase, mitochondrial precursor protein, putative, expressed
AT1G18450.1	500	499	497	500	0.0090439	actin-related protein 4	ARP4	PF00022	PTHR11937,PTHR11937:SF235			LOC_Os08g04280.2	actin, putative, expressed
AT1G18460.1	406	260	403	261	-0.627764	alpha/beta-Hydrolases superfamily protein		PF04083	PTHR11005,PTHR11005:SF17	KOG2624	GO:0006629	LOC_Os01g33784.1	lipase family protein, putative, expressed
AT1G18470.1	183	215	182	215	0.246609	Transmembrane Fragile-X-F-associated protein		PF13920,PF10269	PTHR10044	KOG4172		LOC_Os03g49900.1	zinc finger, C3HC4 type domain containing protein, expressed
AT1G18480.1	139	158	138	158	0.198851	Calcineurin-like metallo-phosphoesterase superfamily protein	SLP2	PF00149	PTHR11668,PTHR11668:SF267		GO:0016787	LOC_Os11g15570.1	Ser/Thr protein phosphatase family protein, putative, expressed
AT1G18485.1	160	123	159	123	-0.361494	Pentatricopeptide repeat (PPR) superfamily protein		PF14432,PF13812,PF13041,PF01535	PTHR24015,PTHR24015:SF475			LOC_Os04g39410.1	pentatricopeptide, putative, expressed
AT1G18490.1	209	191	208	192	-0.116498	2-aminoethanethiol dioxygenase, putative (DUF1637)		PF07847	PTHR22966	KOG4281	GO:0055114,GO:0016702	LOC_Os08g03870.1	2-aminoethanethiol dioxygenase, putative, expressed
AT1G18500.1	514	543	511	545	0.0940282	methylthioalkylmalate synthase-like 4	MAML-4	PF08502,PF00682	PTHR10277,PTHR10277:SF42		GO:0009098,GO:0003852,GO:0003824	LOC_Os11g04670.1	2-isopropylmalate synthase B, putative, expressed
AT1G18540.1	2922	3651	2906	3665	0.334816	Ribosomal protein L6 family protein		PF03868,PF01159	PTHR10715	KOG1694	GO:0006412,GO:0005840,GO:0005622,GO:0003735	LOC_Os04g39700.1	60S ribosomal protein L6, putative, expressed
AT1G18550.1	141	147	140	147	0.068661	ATP binding microtubule motor family protein		PF00225	PTHR24115,PTHR24115:SF372	KOG0242	GO:0008017,GO:0007018,GO:0005524,GO:0003777,GO:0005871	LOC_Os01g42070.1	kinesin motor domain containing protein, putative, expressed
AT1G18560.1	71	61	71	61	-0.205454	BED zinc finger and hAT dimerization domain-containing protein		PF02892,PF14372,PF05699	PTHR23272,PTHR23272:SF21	KOG1121	GO:0003677,GO:0046983	LOC_Os01g02100.2	transposon protein, putative, unclassified, expressed
AT1G18570.1	17	11	17	11	-0.614569	myb domain protein 51	MYB51	PF00249	PTHR10641,PTHR10641:SF586	KOG0048		LOC_Os08g33660.1	MYB family transcription factor, putative, expressed
AT1G18580.1	292	289	290	290	-0.00403617	galacturonosyltransferase 11	GAUT11	PF01501	PTHR32116,PTHR32116:SF20		GO:0016757,GO:0047262	LOC_Os03g30000.1	glycosyl transferase 8 domain containing protein, putative, expressed
AT1G18590.1	38	37	38	37	-0.0250118	sulfotransferase 17	SOT17	PF13469	PTHR11783,PTHR11783:SF75	KOG1584		LOC_Os06g42120.1	sulfotransferase domain containing protein, expressed
AT1G18600.1	231	238	229	239	0.0596169	RHOMBOID-like protein 12	RBL12	PF01694	PTHR22936,PTHR22936:SF17	KOG2980	GO:0016021,GO:0004252,GO:0006508	LOC_Os01g55740.1	OsRhmbd4 - Putative Rhomboid homologue, expressed
AT1G18610.1	225	253	224	254	0.182669	Galactose oxidase/kelch repeat superfamily protein		PF13415,PF13418	PTHR23244	KOG0379		LOC_Os01g19480.1	kelch motif family protein, putative, expressed
AT1G18620.2	286	534	284	536	0.916861	LONGIFOLIA protein	TRM3	PF14383,PF14309	PTHR31680,PTHR31680:SF3			LOC_Os07g01860.1	expressed protein
AT1G18630.1	87	117	87	117	0.441035	glycine-rich RNA-binding protein 6	GR-RBP6	PF00076	PTHR24012		GO:0003676	LOC_Os12g31800.1	glycine-rich RNA-binding protein 7, putative, expressed
AT1G18640.2	222	299	220	300	0.443852	3-phosphoserine phosphatase	PSP	PF00702	PTHR10000,PTHR10000:SF13	KOG1615		LOC_Os11g41160.3	phosphoserine phosphatase, chloroplast precursor, putative, expressed
AT1G18650.1	308	376	306	377	0.301706	plasmodesmata callose-binding protein 3	PDCB3	PF07983	PTHR32227,PTHR32227:SF75			LOC_Os03g54910.1	X8 domain containing protein, expressed
AT1G18660.4	175	191	174	192	0.13993	zinc finger (C3HC4-type RING finger) family protein		PF13414,PF13920,PF02190	PTHR23327,PTHR23327:SF9	KOG4159	GO:0006508,GO:0004176	LOC_Os12g16690.1	zinc finger, C3HC4 type domain containing protein, expressed
AT1G18670.3	130	124	129	124	-0.0548468	Protein kinase superfamily protein	IBS1	PF00069	PTHR24056,PTHR24056:SF228		GO:0006468,GO:0005524,GO:0004672	LOC_Os07g40550.1	IBS1, putative, expressed
AT1G18680.1	49	47	48	47	-0.0318999	HNH endonuclease domain-containing protein			PTHR33427			LOC_Os10g18890.1	HNH endonuclease domain-containing protein, putative, expressed
AT1G18690.1	54	68	54	68	0.345969	Galactosyl transferase GMA12/MNN10 family protein	XXT4	PF05637	PTHR31311,PTHR31311:SF4	KOG4748	GO:0016757,GO:0016021	LOC_Os02g32750.2	glycosyltransferase, putative, expressed
AT1G18700.5	115	141	114	141	0.308154	DNAJ heat shock N-terminal domain-containing protein						LOC_Os07g43870.2	heat shock protein DnaJ, putative, expressed
AT1G18710.1	26	25	25	25	-0.0149519	myb domain protein 47	MYB47	PF00249	PTHR10641,PTHR10641:SF471			LOC_Os08g33660.1	MYB family transcription factor, putative, expressed
AT1G18720.1	688	676	684	678	-0.0130075	ER membrane protein, putative (DUF962)		PF06127	PTHR28026,PTHR28026:SF4	KOG3292		LOC_Os02g36870.1	YGL010w, putative, expressed
AT1G18730.1	289	318	287	319	0.149207	NDH dependent flow 6	PnsB4		PTHR36315,PTHR36315:SF1			LOC_Os02g51020.1	expressed protein
AT1G18740.1	827	457	823	459	-0.842205	ROH1, putative (DUF793)		PF05633	PTHR31509,PTHR31509:SF0			LOC_Os12g06780.1	expressed protein
AT1G18750.3	16	8	15	8	-0.940854	AGAMOUS-like 65	AGL65	PF00319	PTHR11945,PTHR11945:SF156		GO:0046983,GO:0003677	LOC_Os11g43740.1	OsMADS68 - MADS-box family gene with MIKC* type-box, expressed
AT1G18773.4	14	9	13	9	-0.65349	acyl thioesterase-like protein			PTHR10655,PTHR10655:SF20			LOC_Os04g57370.1	acyl-protein thioesterase, putative, expressed
AT1G18800.1	285	316	283	317	0.16496	NAP1-related protein 2	NRP2	PF00956	PTHR11875,PTHR11875:SF60	KOG1508	GO:0006334,GO:0005634	LOC_Os02g36710.1	SET, putative, expressed
AT1G18810.1	20	6	20	6	-1.84852	phytochrome kinase substrate-like protein			PTHR33781,PTHR33781:SF3
AT1G18830.1	6	8	5	8	0.554368	Transducin/WD40 repeat-like superfamily protein		PF00400,PF12931	PTHR13923,PTHR13923:SF11		GO:0005515	LOC_Os07g46370.1	WD domain, G-beta repeat domain containing protein, expressed
AT1G18835.1	5	4	4	4	-0.156874	mini zinc finger	MIF3	PF04770	PTHR31948			LOC_Os08g37400.1	ZF-HD homeobox protein, putative, expressed
AT1G18840.1	812	914	808	917	0.18335	IQ-domain 30	IQD30	PF13178,PF00612	PTHR32295,PTHR32295:SF14		GO:0005515	LOC_Os05g45930.1	IQ calmodulin-binding motif family protein, putative, expressed
AT1G18850.1	97	126	96	127	0.398433	hypothetical protein			PTHR37181			LOC_Os01g02170.1	expressed protein
AT1G18880.1	245	128	244	129	-0.923175	Major facilitator superfamily protein	NRT1.9	PF00854	PTHR11654,PTHR11654:SF59		GO:0016020,GO:0006810,GO:0005215	LOC_Os03g48180.1	peptide transporter PTR2, putative, expressed
AT1G18890.1	367	445	365	446	0.291893	calcium-dependent protein kinase 1	CDPK1	PF13499,PF07714	PTHR24349,PTHR24349:SF167	KOG0032	GO:0006468,GO:0004672	LOC_Os07g38120.1	CAMK_CAMK_like.34 - CAMK includes calcium/calmodulin depedent protein kinases, expressed
AT1G18900.3	248	165	247	166	-0.57447	Pentatricopeptide repeat (PPR) superfamily protein		PF13041	PTHR24015,PTHR24015:SF268			LOC_Os12g44170.1	pentatricopeptide, putative, expressed
AT1G18910.1	39	30	39	30	-0.389393	zinc ion binding protein		PF13639,PF01814,PF05495,PF14599	PTHR21319,PTHR21319:SF17	KOG1940	GO:0008270,GO:0005515	LOC_Os01g49470.1	E3 ubiquitin ligase, putative, expressed
AT1G18940.1	7	4	7	4	-0.793893	Nodulin-like / Major Facilitator Superfamily protein		PF06813	PTHR21576,PTHR21576:SF33			LOC_Os12g44180.1	nodulin, putative, expressed
AT1G18950.2	51	33	50	33	-0.601651	DDT domain superfamily		PF02791	PTHR14296			LOC_Os07g09580.1	aminoacyl-tRNA synthetase, putative, expressed
AT1G18975.1	3	5	3	5	0.750428	hypothetical protein
AT1G18980.1	3	5	3	5	0.750428	RmlC-like cupins superfamily protein		PF07883	PTHR31238,PTHR31238:SF46			LOC_Os05g19670.1	Cupin domain containing protein, expressed
AT1G18990.1	54	41	54	41	-0.401645	myosin-binding protein, putative (Protein of unknown function, DUF593)		PF04576	PTHR31448,PTHR31448:SF9			LOC_Os03g58490.2	DUF593 domain containing protein, expressed
AT1G19000.1	710	646	706	648	-0.124008	Homeodomain-like superfamily protein		PF00249	PTHR12374,PTHR12374:SF26			LOC_Os10g41200.1	MYB family transcription factor, putative, expressed
AT1G19010.1	16	9	15	9	-0.853056	hypothetical protein			PTHR34778,PTHR34778:SF1			LOC_Os02g37020.1	expressed protein
AT1G19020.1	6	10	5	10	0.875622	CDP-diacylglycerol-glycerol-3-phosphate 3-phosphatidyltransferase			PTHR33386,PTHR33386:SF4			LOC_Os02g50710.1	expressed protein
AT1G19040.1	2	7	1	7	2.12727	NAC (No Apical Meristem) domain transcriptional regulator superfamily protein		PF02365	PTHR31744		GO:0006355,GO:0003677	LOC_Os07g48550.1	no apical meristem protein, putative, expressed
AT1G19050.1	84	143	84	144	0.781056	response regulator 7	ARR7	PF00072	PTHR26402,PTHR26402:SF526		GO:0000160	LOC_Os12g04500.1	response regulator receiver domain containing protein, expressed
AT1G19070.1	10	10	9	10	0.0133579	F-box family protein		PF00646	PTHR31639,PTHR31639:SF6		GO:0005515	LOC_Os10g03780.1	OsFBX351 - F-box domain containing protein, expressed
AT1G19080.1	104	103	103	103	0.00654904	GINS complex protein	TTN10	PF05916	PTHR22768	KOG1106		LOC_Os08g17294.2	PSF3 - Putative GINS complex subunit, expressed
AT1G19090.1	6	5	6	5	-0.400943	receptor-like serine/threonine kinase 2	RKF2	PF01657,PF00069	PTHR27002,PTHR27002:SF121	KOG1187	GO:0006468,GO:0005524,GO:0004672	LOC_Os05g03920.1	TKL_IRAK_DUF26-lf.3 - DUF26 kinases have homology to DUF26 containing loci, expressed
AT1G19100.1	202	131	200	131	-0.61315	Histidine kinase-, DNA gyrase B-, and HSP90-like ATPase family protein	DMS11	PF13589	PTHR23336,PTHR23336:SF2	KOG1845		LOC_Os01g36840.1	ATP-binding region, ATPase-like domain containing protein, expressed
AT1G19110.1	662	704	658	706	0.102285	inter-alpha-trypsin inhibitor heavy chain-like protein		PF13768	PTHR10338,PTHR10338:SF114			LOC_Os03g29350.1	von Willebrand factor type A domain containing protein, expressed
AT1G19120.1	296	330	294	331	0.168259	Small nuclear ribonucleoprotein family protein	LSM1A	PF01423	PTHR15588,PTHR15588:SF10	KOG1782		LOC_Os04g36810.1	LSM domain containing protein, expressed
AT1G19130.1	279	326	278	327	0.235807	RmlC-like jelly roll fold protein		PF06172	PTHR33387,PTHR33387:SF3			LOC_Os08g35480.1	cupin superfamily protein, putative, expressed
AT1G19140.2	368	333	366	334	-0.130776	ubiquinone biosynthesis COQ9-like protein		PF08511	PTHR21427	KOG2969		LOC_Os03g29180.1	ubiquinone biosynthesis protein COQ9, mitochondrial precursor, putative, expressed
AT1G19150.1	1000	801	995	804	-0.306668	PSI type II chlorophyll a/b-binding protein (Lhca2*1)	Lhca6	PF00504	PTHR21649,PTHR21649:SF5		GO:0016020,GO:0009765	LOC_Os09g26810.1	chlorophyll A-B binding protein, putative, expressed
AT1G19160.1	35	32	34	32	-0.117711	F-box family protein		PF00646,PF08268	PTHR31790,PTHR31790:SF10		GO:0005515	LOC_Os06g07460.1	OsFBX190 - F-box domain containing protein, expressed
AT1G19170.1	229	250	228	251	0.140013	Pectin lyase-like superfamily protein		PF12708	PTHR31339,PTHR31339:SF14			LOC_Os09g26800.1	polygalacturonase, putative, expressed
AT1G19180.1	582	370	578	371	-0.638859	jasmonate-zim-domain protein 1	JAZ1	PF09425,PF06200	PTHR33077,PTHR33077:SF13			LOC_Os07g42370.2	zinc-finger protein, putative, expressed
AT1G19190.1	251	260	249	261	0.0644852	alpha/beta-Hydrolases superfamily protein		PF00135	PTHR23024,PTHR23024:SF186	KOG1515		LOC_Os09g28750.1	gibberellin receptor GID1L2, putative, expressed
AT1G19200.2	6	8	6	8	0.4285	cyclin-dependent kinase, putative (DUF581)		PF04570	PTHR33059,PTHR33059:SF6			LOC_Os09g26370.1	DUF581 domain containing protein, expressed
AT1G19210.1	15	2	15	2	-2.89343	Integrase-type DNA-binding superfamily protein		PF00847	PTHR31985,PTHR31985:SF19		GO:0006355,GO:0003700	LOC_Os02g54050.1	ethylene-responsive transcription factor, putative, expressed
AT1G19220.1	190	130	188	130	-0.535786	auxin response factor 19	ARF19	PF02309,PF02362,PF06507	PTHR31384,PTHR31384:SF21		GO:0006355,GO:0005634,GO:0003677,GO:0009725	LOC_Os06g48950.1	auxin response factor 19, putative, expressed
AT1G19230.2	20	15	20	15	-0.401963	Riboflavin synthase-like superfamily protein		PF01794,PF08022,PF08414,PF08030	PTHR11972,PTHR11972:SF44		GO:0055114,GO:0016491,GO:0050664,GO:0004601	LOC_Os09g26660.1	ferric reductase, putative, expressed
AT1G19240.1	76	74	75	74	-0.0251577	transmembrane protein						LOC_Os01g05140.1	expressed protein
AT1G19270.1	50	70	49	70	0.502961	DA1	DA1	PF00412,PF12315	PTHR24209,PTHR24209:SF10	KOG1703	GO:0008270	LOC_Os06g08400.2	LIM domain-containing protein, putative, expressed
AT1G19290.1	89	61	89	61	-0.543361	Pentatricopeptide repeat (PPR) superfamily protein		PF13041	PTHR24015,PTHR24015:SF695			LOC_Os05g19390.1	PPR repeat containing protein, expressed
AT1G19300.1	468	325	465	326	-0.512748	Nucleotide-diphospho-sugar transferases superfamily protein	PARVUS	PF01501	PTHR13778,PTHR13778:SF6		GO:0016757	LOC_Os03g47530.1	glycosyl transferase 8 domain containing protein, putative, expressed
AT1G19310.1	87	85	86	85	-0.0117776	RING/U-box superfamily protein		PF13920	PTHR12313,PTHR12313:SF10	KOG4172		LOC_Os12g43930.1	zinc finger, C3HC4 type domain containing protein, expressed
AT1G19320.1	11	2	11	2	-2.44597	Pathogenesis-related thaumatin superfamily protein		PF00314	PTHR31048,PTHR31048:SF10			LOC_Os08g43510.1	thaumatin, putative, expressed
AT1G19330.3	323	275	321	276	-0.218562	histone deacetylase complex subunit		PF13867	PTHR13286,PTHR13286:SF6		GO:0005515	LOC_Os10g21460.1	expressed protein
AT1G19340.1	72	40	72	40	-0.852805	Methyltransferase MT-A70 family protein		PF05063	PTHR12829	KOG2356	GO:0008168,GO:0006139	LOC_Os03g10224.1	MT-A70 domain containing protein, expressed
AT1G19350.3	300	284	298	285	-0.0630451	Brassinosteroid signaling positive regulator (BZR1) family protein	BES1	PF05687	PTHR31506,PTHR31506:SF6			LOC_Os07g39220.1	BES1/BZR1 homolog protein, putative, expressed
AT1G19360.1	491	646	488	649	0.410713	Nucleotide-diphospho-sugar transferase family protein	RRA3	PF03407	PTHR10994,PTHR10994:SF3			LOC_Os07g39840.1	expressed protein
AT1G19370.1	120	138	119	138	0.215806	membrane protein			PTHR35464,PTHR35464:SF1			LOC_Os06g02480.1	expressed protein
AT1G19380.1	56	216	56	216	1.95752	sugar, putative (DUF1195)		PF06708	PTHR34358,PTHR34358:SF1			LOC_Os07g41660.1	expressed protein
AT1G19394.1	77	72	76	72	-0.0737445	hypothetical protein
AT1G19396.2	14	8	13	8	-0.834502	hypothetical protein
AT1G19397.1	79	85	78	85	0.127929	transmembrane protein
AT1G19400.1	429	310	427	311	-0.455282	Erythronate-4-phosphate dehydrogenase family protein			PTHR10996,PTHR10996:SF123			LOC_Os03g56420.1	expressed protein
AT1G19430.1	244	214	242	215	-0.172784	S-adenosyl-L-methionine-dependent methyltransferases superfamily protein		PF03141	PTHR10108,PTHR10108:SF733		GO:0008168	LOC_Os03g56380.1	methyltransferase, putative, expressed
AT1G19440.1	236	321	234	322	0.458106	3-ketoacyl-CoA synthase 4	KCS4	PF08541,PF08392	PTHR31561,PTHR31561:SF15		GO:0016747,GO:0008610,GO:0016020,GO:0006633	LOC_Os05g49290.1	3-ketoacyl-CoA synthase, putative, expressed
AT1G19450.1	571	542	567	544	-0.0617857	Major facilitator superfamily protein		PF07690	PTHR23500,PTHR23500:SF43	KOG0254	GO:0055085,GO:0016021	LOC_Os05g50280.1	transporter family protein, putative, expressed
AT1G19480.1	148	115	147	115	-0.351868	DNA glycosylase superfamily protein		PF00730	PTHR10242,PTHR10242:SF0	KOG1918	GO:0006284	LOC_Os05g50290.1	hhH-GPD superfamily base excision DNA repair protein, putative, expressed
AT1G19485.1	262	241	260	242	-0.104356	Transducin/WD40 repeat-like superfamily protein		PF02178	PTHR15052,PTHR15052:SF2	KOG0266	GO:0003677	LOC_Os01g63910.1	AT hook motif family protein, expressed
AT1G19490.1	60	59	60	59	-0.0227941	Basic-leucine zipper (bZIP) transcription factor family protein		PF00170	PTHR22952,PTHR22952:SF208		GO:0043565,GO:0006355,GO:0003700	LOC_Os11g05640.1	bZIP transcription factor domain containing protein, expressed
AT1G19500.1	20	29	20	29	0.524324	hypothetical protein
AT1G19520.1	450	415	448	417	-0.103318	pentatricopeptide (PPR) repeat-containing protein	NFD5	PF13812,PF01535	PTHR24015,PTHR24015:SF515			LOC_Os02g39820.1	PPR repeat domain containing protein, putative, expressed
AT1G19540.1	150	202	149	202	0.444023	NmrA-like negative transcriptional regulator family protein		PF01370	PTHR10366,PTHR10366:SF441		GO:0050662,GO:0003824	LOC_Os06g27770.1	isoflavone reductase homolog IRL, putative, expressed
AT1G19550.1	125	155	124	156	0.323723	Glutathione S-transferase family protein		PF13417,PF13410	PTHR11260,PTHR11260:SF171	KOG1422	GO:0005515	LOC_Os06g12630.2	glutathione S-transferase, N-terminal domain containing protein, expressed
AT1G19570.1	4336	4717	4313	4735	0.134803	dehydroascorbate reductase	DHAR1	PF13410,PF13417	PTHR11260,PTHR11260:SF171	KOG1422	GO:0005515	LOC_Os05g02530.1	glutathione S-transferase, N-terminal domain containing protein, expressed
AT1G19580.1	247	256	246	257	0.062263	gamma carbonic anhydrase 1	GAMMA CA1	PF00132	PTHR13061,PTHR13061:SF9			LOC_Os01g18070.1	bacterial transferase hexapeptide domain containing protein, expressed
AT1G19600.1	321	287	319	288	-0.148163	pfkB-like carbohydrate kinase family protein		PF00294	PTHR10584,PTHR10584:SF153	KOG2854		LOC_Os01g01620.1	kinase, pfkB family, putative, expressed
AT1G19620.1	6	7	5	7	0.361723	transmembrane protein
AT1G19630.1	17	14	16	14	-0.275946	cytochrome P450, family 722, subfamily A, polypeptide 1	CYP722A1	PF00067	PTHR24286,PTHR24286:SF28	KOG0157	GO:0055114,GO:0020037,GO:0016705,GO:0005506	LOC_Os05g01120.1	cytochrome P450, putative, expressed
AT1G19640.1	63	49	63	49	-0.349165	jasmonic acid carboxyl methyltransferase	JMT	PF03492	PTHR31009,PTHR31009:SF5		GO:0008168	LOC_Os01g50610.1	SAM dependent carboxyl methyltransferase, putative, expressed
AT1G19650.1	44	39	43	39	-0.144182	Sec14p-like phosphatidylinositol transfer family protein		PF13716	PTHR23324,PTHR23324:SF75	KOG1471		LOC_Os02g04020.1	expressed protein
AT1G19660.1	157	115	156	115	-0.437165	Wound-responsive family protein		PF02151,PF02577	PTHR15160,PTHR15160:SF3		GO:0005515,GO:0004518	LOC_Os08g26870.2	wound responsive protein, putative, expressed
AT1G19670.1	730	344	726	345	-1.07199	chlorophyllase 1	CLH1	PF07224	PTHR33428,PTHR33428:SF2		GO:0047746,GO:0015996	LOC_Os10g28370.1	chlorophyllase-2, chloroplast precursor, putative, expressed
AT1G19680.1	231	167	230	167	-0.458907	RING/U-box superfamily protein			PTHR31150,PTHR31150:SF8			LOC_Os01g15630.2	zinc finger, C3HC4 type domain containing protein, expressed
AT1G19690.1	133	110	132	110	-0.261451	NAD(P)-binding Rossmann-fold superfamily protein		PF01370	PTHR10366,PTHR10366:SF430		GO:0050662,GO:0003824	LOC_Os01g15660.1	NAD dependent epimerase/dehydratase family protein, putative, expressed
AT1G19700.1	273	158	272	159	-0.775721	BEL1-like homeodomain 10	BEL10	PF05920,PF07526	PTHR11850,PTHR11850:SF111	KOG0773	GO:0006355,GO:0003677	LOC_Os12g43950.2	homeobox domain containing protein, expressed
AT1G19710.1	258	281	256	282	0.139482	UDP-Glycosyltransferase superfamily protein		PF00534,PF16994	PTHR12526,PTHR12526:SF376	KOG0853		LOC_Os01g15780.1	glycosyl transferase, group 1 domain containing protein, expressed
AT1G19715.3	526	690	523	692	0.405218	Mannose-binding lectin superfamily protein		PF01419	PTHR23244,PTHR23244:SF249		GO:0080028,GO:0019762	LOC_Os05g43240.3	jacalin-like lectin domain containing protein, expressed
AT1G19720.1	505	472	502	474	-0.0827152	Pentatricopeptide repeat (PPR-like) superfamily protein		PF14432,PF01535,PF13041	PTHR24015,PTHR24015:SF339			LOC_Os03g59264.1	calreticulin family protein, expressed
AT1G19730.1	113	125	112	125	0.159677	Thioredoxin superfamily protein	ATTRX4	PF13098	PTHR10438,PTHR10438:SF274	KOG0907	GO:0045454,GO:0015035,GO:0006662	LOC_Os07g08840.1	thioredoxin, putative, expressed
AT1G19740.1	575	586	572	588	0.0395873	ATP-dependent protease La (LON) domain protein		PF02190	PTHR23327,PTHR23327:SF12	KOG4159	GO:0006508,GO:0004176	LOC_Os07g32560.1	ATP-dependent protease, putative, expressed
AT1G19750.1	15	11	14	11	-0.384698	Transducin/WD40 repeat-like superfamily protein		PF00400	PTHR22850,PTHR22850:SF2	KOG4283	GO:0005515	LOC_Os02g20430.1	WD domain, G-beta repeat domain containing protein, expressed
AT1G19770.1	597	766	593	769	0.373342	purine permease 14	PUP14	PF16913	PTHR31376,PTHR31376:SF2		GO:0016021,GO:0005215	LOC_Os02g46380.1	purine permease, putative, expressed
AT1G19780.1	59	113	59	113	0.95042	cyclic nucleotide gated channel 8	CNGC8	PF00027,PF00520	PTHR10217,PTHR10217:SF489		GO:0055085,GO:0016020,GO:0006811,GO:0005216	LOC_Os04g55080.1	cyclic nucleotide-gated ion channel, putative, expressed
AT1G19790.1	9	3	8	3	-1.48926	SHI-related sequence 7	SRS7	PF05142	PTHR31604,PTHR31604:SF3			LOC_Os06g49830.1	SHI, putative, expressed
AT1G19830.1	149	156	148	156	0.0799714	SAUR-like auxin-responsive protein family		PF02519	PTHR31374,PTHR31374:SF41		GO:0009733	LOC_Os02g24700.1	OsSAUR8 - Auxin-responsive SAUR gene family member, expressed
AT1G19835.1	488	907	485	910	0.907503	filament-like protein (DUF869)		PF05911	PTHR31580,PTHR31580:SF4			LOC_Os03g14250.1	plant protein of unknown function DUF869 domain containing protein, expressed
AT1G19840.1	47	88	47	88	0.918291	SAUR-like auxin-responsive protein family		PF02519	PTHR31374,PTHR31374:SF34		GO:0009733	LOC_Os04g56680.1	OsSAUR22 - Auxin-responsive SAUR gene family member, expressed
AT1G19850.1	128	131	127	132	0.0524449	Transcriptional factor B3 family protein / auxin-responsive factor AUX/IAA-like protein	MP	PF02309,PF02362,PF06507	PTHR31384,PTHR31384:SF10		GO:0006355,GO:0005634,GO:0003677,GO:0009725	LOC_Os04g56850.1	auxin response factor, putative, expressed
AT1G19860.2	212	137	211	138	-0.616492	Zinc finger C-x8-C-x5-C-x3-H type family protein			PTHR33400,PTHR33400:SF2			LOC_Os04g56750.1	zinc finger C-x8-C-x5-C-x3-H type family protein, expressed
AT1G19870.1	331	224	329	225	-0.549994	IQ-domain 32	iqd32	PF13178,PF00612	PTHR32295,PTHR32295:SF16		GO:0005515	LOC_Os04g56740.1	IQ calmodulin-binding motif family protein, putative, expressed
AT1G19880.1	593	504	589	505	-0.221339	Regulator of chromosome condensation (RCC1) family protein		PF00415	PTHR22870,PTHR22870:SF195			LOC_Os04g56720.1	RCC2, putative, expressed
AT1G19900.1	9	1	8	1	-3.07422	glyoxal oxidase-related protein		PF09118,PF07250	PTHR32208,PTHR32208:SF19			LOC_Os03g15320.1	glyoxal oxidase-related, putative, expressed
AT1G19910.1	1216	1387	1209	1392	0.203295	ATPase, F0/V0 complex, subunit C protein	AVA-P2	PF00137	PTHR10263,PTHR10263:SF13	KOG0232	GO:0033177,GO:0015991,GO:0015078	LOC_Os02g34510.1	vacuolar ATP synthase, putative, expressed
AT1G19920.1	1490	1113	1482	1117	-0.406875	Pseudouridine synthase/archaeosine transglycosylase-like family protein	APS2	PF14306,PF01747	PTHR11055,PTHR11055:SF25		GO:0004781	LOC_Os03g53230.1	bifunctional 3-phosphoadenosine 5-phosphosulfate synthetase, putative, expressed
AT1G19940.1	201	231	199	231	0.214543	glycosyl hydrolase 9B5	GH9B5	PF00759	PTHR22298,PTHR22298:SF57		GO:0005975,GO:0004553	LOC_Os09g36350.1	endoglucanase, putative, expressed
AT1G19950.1	255	192	253	193	-0.393135	HVA22-like protein H (ATHVA22H)	HVA22H	PF03134	PTHR12300,PTHR12300:SF26	KOG1726		LOC_Os02g02920.1	HVA22, putative, expressed
AT1G19960.1	45	18	45	18	-1.30838	transcription factor			PTHR32009,PTHR32009:SF16
AT1G19970.1	243	221	242	222	-0.123402	ER lumen protein retaining receptor family protein		PF00810	PTHR10585,PTHR10585:SF34	KOG3106	GO:0046923,GO:0016021,GO:0006621	LOC_Os09g36370.1	ER lumen protein retaining receptor containing protein, expressed
AT1G19980.1	68	47	67	47	-0.524216	cytomatrix protein-like protein			PTHR35992			LOC_Os04g02680.1	expressed protein
AT1G19990.1	168	146	167	147	-0.188847	nucleolin			PTHR33828,PTHR33828:SF2			LOC_Os03g14580.1	expressed protein
AT1G20010.1	984	1525	979	1531	0.645553	tubulin beta-5 chain	TUB5	PF03953,PF00091	PTHR11588,PTHR11588:SF97		GO:0003924,GO:0007017,GO:0005874	LOC_Os03g56810.1	tubulin/FtsZ domain containing protein, putative, expressed
AT1G20020.1	1265	1097	1258	1101	-0.191517	ferredoxin-NADP[+]-oxidoreductase 2	FNR2	PF00175	PTHR19384,PTHR19384:SF82		GO:0055114,GO:0016491	LOC_Os06g01850.1	ferredoxin--NADP reductase, chloroplast precursor, putative, expressed
AT1G20030.2	42	44	42	44	0.0643303	Pathogenesis-related thaumatin superfamily protein		PF00314	PTHR31048,PTHR31048:SF27			LOC_Os10g05660.1	thaumatin, putative, expressed
AT1G20050.1	572	692	568	695	0.289502	C-8,7 sterol isomerase	HYD1	PF05241	PTHR14207,PTHR14207:SF0	KOG4826	GO:0047750,GO:0016125,GO:0016021	LOC_Os01g01369.1	3-beta-hydroxysteroid-Delta-isomerase, putative, expressed
AT1G20060.1	14	7	14	7	-0.986821	ATP binding microtubule motor family protein		PF00225	PTHR24115,PTHR24115:SF480	KOG0242	GO:0008017,GO:0007018,GO:0005524,GO:0003777,GO:0005871	LOC_Os02g01180.1	kinesin motor domain containing protein, putative, expressed
AT1G20070.1	85	41	85	41	-1.03825	hypothetical protein			PTHR33670,PTHR33670:SF2
AT1G20090.1	711	1141	707	1146	0.695885	RHO-related protein from plants 2	ROP2	PF08477	PTHR24072,PTHR24072:SF171	KOG0393	GO:0007264,GO:0005525	LOC_Os02g20850.1	ras-related protein, putative, expressed
AT1G20100.1	383	396	380	397	0.0616398	DNA ligase-like protein			PTHR34660,PTHR34660:SF1			LOC_Os03g13810.1	expressed protein
AT1G20110.1	1084	1128	1078	1132	0.0708376	RING/FYVE/PHD zinc finger superfamily protein		PF01363	PTHR22835,PTHR22835:SF196		GO:0046872	LOC_Os07g38580.1	zinc finger family protein, putative, expressed
AT1G20120.1	18	13	18	13	-0.456023	GDSL-like Lipase/Acylhydrolase superfamily protein		PF00657	PTHR22835,PTHR22835:SF184		GO:0016788	LOC_Os02g01140.1	GDSL-like lipase/acylhydrolase, putative, expressed
AT1G20140.1	171	181	170	182	0.0996283	SKP1-like 4	SK4	PF03931,PF01466	PTHR11165	KOG1724	GO:0006511	LOC_Os09g36830.1	Skp1 family, dimerisation domain containing protein, expressed
AT1G20160.1	156	114	155	114	-0.440546	Subtilisin-like serine endopeptidase family protein	ATSBT5.2	PF02225,PF05922,PF00082	PTHR10795,PTHR10795:SF328		GO:0006508,GO:0004252	LOC_Os09g30458.1	subtilisin-like protease, putative, expressed
AT1G20180.1	5	4	5	4	-0.308466	transmembrane protein (DUF677)		PF05055	PTHR31113,PTHR31113:SF2			LOC_Os03g05440.1	DUF677 domain containing protein, putative, expressed
AT1G20190.1	165	149	164	149	-0.134049	expansin 11	EXPA11	PF03330,PF01357	PTHR31867,PTHR31867:SF4			LOC_Os04g15840.1	expansin precursor, putative, expressed
AT1G20200.1	989	873	984	876	-0.167379	PAM domain (PCI/PINT associated module) protein	EMB2719	PF01399,PF08375	PTHR10758,PTHR10758:SF3		GO:0005515,GO:0042176,GO:0030234,GO:0000502	LOC_Os08g43640.1	26S proteasome non-ATPase regulatory subunit 3, putative, expressed
AT1G20220.1	792	880	787	883	0.165472	Alba DNA/RNA-binding protein		PF01918	PTHR13516,PTHR13516:SF4	KOG2567	GO:0003676	LOC_Os09g37006.1	protein of unknown function domain containing protein, expressed
AT1G20225.1	233	243	232	244	0.0739875	Thioredoxin superfamily protein		PF13462	PTHR33875,PTHR33875:SF2			LOC_Os09g37020.1	expressed protein
AT1G20230.1	18	14	18	14	-0.348902	Pentatricopeptide repeat (PPR) superfamily protein		PF14432,PF13041,PF01535	PTHR24015,PTHR24015:SF157			LOC_Os05g30710.1	pentatricopeptide, putative, expressed
AT1G20240.1	19	16	19	16	-0.28028	SWI-SNF-related chromatin binding protein			PTHR32133
AT1G20260.1	1556	1409	1548	1414	-0.130169	ATPase, V1 complex, subunit B protein	VAB3	PF02874,PF00306,PF00006	PTHR15184,PTHR15184:SF53		GO:0046034,GO:0015992,GO:0033178,GO:0016820,GO:0015991,GO:0005524	LOC_Os01g51380.2	ATP synthase, putative, expressed
AT1G20270.1	140	174	139	174	0.328025	2-oxoglutarate (2OG) and Fe(II)-dependent oxygenase superfamily protein		PF03171	PTHR10869,PTHR10869:SF78	KOG1591	GO:0055114,GO:0016491	LOC_Os02g58070.1	oxidoreductase, putative, expressed
AT1G20300.1	90	77	89	77	-0.203422	Pentatricopeptide repeat (PPR) superfamily protein		PF13812,PF01535,PF13041	PTHR24015,PTHR24015:SF408			LOC_Os09g37070.1	pentatricopeptide, putative, expressed
AT1G20310.1	8	9	8	9	0.183387	syringolide-induced protein			PTHR34779			LOC_Os09g37080.1	expressed protein
AT1G20320.1	4	8	4	8	1.01346	Haloacid dehalogenase-like hydrolase (HAD) superfamily protein		PF03031	PTHR23081			LOC_Os05g32430.1	NLI interacting factor-like phosphatase, putative, expressed
AT1G20330.1	2608	3616	2594	3630	0.484907	sterol methyltransferase 2	SMT2	PF08241,PF08498	PTHR10108,PTHR10108:SF858	KOG1269	GO:0008168,GO:0008152,GO:0006694	LOC_Os03g04340.1	C-methyltransferase, putative, expressed
AT1G20340.1	13142	15333	13071	15394	0.235965	Cupredoxin superfamily protein	DRT112	PF13473	PTHR34192,PTHR34192:SF2			LOC_Os06g01210.1	plastocyanin, chloroplast precursor, putative, expressed
AT1G20350.1	64	89	63	89	0.49238	translocase inner membrane subunit 17-1	TIM17-1	PF02466	PTHR10485,PTHR10485:SF0	KOG1652	GO:0015450,GO:0006886,GO:0005744	LOC_Os07g41330.1	mitochondrial import inner membrane translocase subunit Tim17, putative, expressed
AT1G20360.1	14	7	14	7	-1.09389	F-box family protein			PTHR31264,PTHR31264:SF2			LOC_Os01g07160.1	OsFBX3 - F-box domain containing protein, expressed
AT1G20370.1	99	129	98	130	0.395452	Pseudouridine synthase family protein		PF01416	PTHR11142,PTHR11142:SF4		GO:0009982,GO:0009451,GO:0003723,GO:0001522	LOC_Os02g44810.1	tRNA pseudouridine synthase family protein, putative, expressed
AT1G20380.1	60	57	60	57	-0.0732607	Prolyl oligopeptidase family protein		PF00326,PF02897	PTHR11757,PTHR11757:SF2		GO:0008236,GO:0006508,GO:0070008,GO:0004252	LOC_Os01g01830.1	OsPOP1 - Putative Prolyl Oligopeptidase homologue, expressed
AT1G20400.1	3	7	2	7	1.39228	hypothetical protein (DUF1204)		PF06721	PTHR31099
AT1G20410.1	57	51	57	51	-0.161806	Pseudouridine synthase family protein			PTHR21568	KOG2364		LOC_Os04g47380.1	coiled-coil domain-containing protein 139, putative, expressed
AT1G20430.1	247	271	245	272	0.147449	hypothetical protein			PTHR36316			LOC_Os06g11060.1	expressed protein
AT1G20440.1	1597	2366	1588	2375	0.580567	cold-regulated 47	COR47	PF00257	PTHR33346,PTHR33346:SF2		GO:0009415,GO:0006950	LOC_Os02g44870.1	dehydrin, putative, expressed
AT1G20450.1	1976	2233	1965	2241	0.189923	Dehydrin family protein	ERD10	PF00257	PTHR33346,PTHR33346:SF2		GO:0009415,GO:0006950	LOC_Os02g44870.1	dehydrin, putative, expressed
AT1G20460.1	78	83	77	83	0.112401	NADH-ubiquinone oxidoreductase chain			PTHR34936,PTHR34936:SF1			LOC_Os03g46681.1	expressed protein
AT1G20470.1	106	71	105	71	-0.564536	SAUR-like auxin-responsive protein family		PF02519	PTHR31374,PTHR31374:SF47		GO:0009733	LOC_Os09g37480.1	OsSAUR53 - Auxin-responsive SAUR gene family member, expressed
AT1G20480.1	112	74	111	74	-0.584582	AMP-dependent synthetase and ligase family protein		PF13193,PF00501	PTHR24096,PTHR24096:SF186		GO:0008152,GO:0003824	LOC_Os03g04000.1	AMP-binding domain containing protein, expressed
AT1G20490.1	11	18	11	18	0.724272	AMP-dependent synthetase and ligase family protein		PF00501	PTHR24096,PTHR24096:SF186	KOG1176	GO:0008152,GO:0003824	LOC_Os03g04000.1	AMP-binding domain containing protein, expressed
AT1G20500.1	22	13	21	13	-0.768915	AMP-dependent synthetase and ligase family protein		PF13193,PF00501	PTHR24096,PTHR24096:SF186		GO:0008152,GO:0003824	LOC_Os03g04000.1	AMP-binding domain containing protein, expressed
AT1G20510.1	310	305	308	306	-0.00774454	OPC-8:0 CoA ligase1	OPCL1	PF13193,PF00501	PTHR24096,PTHR24096:SF186		GO:0008152,GO:0003824	LOC_Os03g04000.1	AMP-binding domain containing protein, expressed
AT1G20520.1	7	18	7	18	1.3349	DUF241 domain protein, putative (DUF241)		PF03087	PTHR31509,PTHR31509:SF6			LOC_Os08g43900.1	carrier, putative, expressed
AT1G20530.1	4	10	4	10	1.33539	girdin (DUF630 and DUF632)		PF04783,PF04782	PTHR21450,PTHR21450:SF19			LOC_Os09g37520.1	DUF630/DUF632 domains containing protein, putative, expressed
AT1G20540.1	251	244	249	244	-0.0274331	Transducin/WD40 repeat-like superfamily protein			PTHR14205,PTHR14205:SF15	KOG1007		LOC_Os08g44010.3	WD domain, G-beta repeat domain containing protein, expressed
AT1G20550.1	423	553	420	555	0.401753	O-fucosyltransferase family protein		PF10250	PTHR31818,PTHR31818:SF1			LOC_Os08g44015.1	growth regulator related protein, putative, expressed
AT1G20560.1	345	336	343	337	-0.0247552	acyl activating enzyme 1	AAE1	PF13193,PF00501	PTHR24095,PTHR24095:SF119		GO:0008152,GO:0003824	LOC_Os03g04120.1	AMP-binding enzyme, putative, expressed
AT1G20570.3	8	9	7	9	0.275756	Spc97 / Spc98 family of spindle pole body (SBP) component		PF04130	PTHR19302,PTHR19302:SF33		GO:0005815,GO:0000922,GO:0000226	LOC_Os02g32340.1	Spc97 / Spc98 family protein, putative, expressed
AT1G20575.1	180	204	179	205	0.194083	Nucleotide-diphospho-sugar transferases superfamily protein	DPMS1	PF13641	PTHR10859	KOG2978		LOC_Os03g60939.1	dolichyl-phosphate beta-glycosyltransferase, putative, expressed
AT1G20580.1	417	464	415	465	0.165869	Small nuclear ribonucleoprotein family protein		PF01423	PTHR23338	KOG3172	GO:0006396	LOC_Os02g01250.1	LSM domain containing protein, expressed
AT1G20590.1	17	8	16	8	-1.12377	cyclin		PF00134,PF02984	PTHR10177,PTHR10177:SF250		GO:0005634	LOC_Os06g51110.1	cyclin, putative, expressed
AT1G20610.1	97	66	96	66	-0.542066	Cyclin B2;3	CYCB2;3	PF02984,PF00134	PTHR10177,PTHR10177:SF250	KOG0653	GO:0005634	LOC_Os06g51110.1	cyclin, putative, expressed
AT1G20620.6	6772	6435	6735	6460	-0.0600927	catalase 3	CAT3	PF06628,PF00199	PTHR11465,PTHR11465:SF19		GO:0055114,GO:0020037,GO:0004096,GO:0006979	LOC_Os03g03910.1	catalase domain containing protein, expressed
AT1G20630.1	901	913	896	917	0.0333882	catalase 1	CAT1	PF06628,PF00199	PTHR11465,PTHR11465:SF19		GO:0055114,GO:0020037,GO:0004096,GO:0006979	LOC_Os03g03910.1	catalase domain containing protein, expressed
AT1G20640.1	323	349	321	350	0.127319	Plant regulator RWP-RK family protein		PF00564,PF02042	PTHR32002,PTHR32002:SF6		GO:0005515	LOC_Os03g03900.1	NIN, putative, expressed
AT1G20650.1	412	360	410	361	-0.18332	Protein kinase superfamily protein	ASG5	PF07714	PTHR27001,PTHR27001:SF3	KOG1187	GO:0006468,GO:0004672	LOC_Os01g71000.1	protein kinase APK1B, chloroplast precursor, putative, expressed
AT1G20670.1	296	313	294	314	0.094145	DNA-binding bromodomain-containing protein		PF00439	PTHR22881,PTHR22881:SF16		GO:0005515	LOC_Os09g37760.1	bromodomain domain containing protein, expressed
AT1G20680.1	441	414	438	416	-0.0760806	transport/golgi organization-like protein (DUF833)		PF05742	PTHR17985,PTHR17985:SF13	KOG2342		LOC_Os04g47680.1	Ser/Thr-rich protein T10 in DGCR region, putative, expressed
AT1G20683.1	5	12	4	12	1.42986	hypothetical protein
AT1G20687.1	4	12	4	12	1.53721	hypothetical protein
AT1G20690.1	41	35	40	35	-0.196805	SWI-SNF-related chromatin binding protein
AT1G20693.1	719	762	715	765	0.0983223	high mobility group B2	HMGB2	PF00505	PTHR13711,PTHR13711:SF223	KOG0381		LOC_Os09g37910.1	HMG1/2, putative, expressed
AT1G20696.2	1202	1300	1196	1305	0.12656	high mobility group B3	HMGB3	PF00505	PTHR13711,PTHR13711:SF223	KOG0381		LOC_Os06g51220.4	HMG1/2, putative, expressed
AT1G20700.1	2	5	2	5	1.33539	WUSCHEL related homeobox 14	WOX14	PF00046	PTHR24326,PTHR24326:SF220	KOG0484	GO:0003677	LOC_Os01g60270.1	homeobox domain containing protein, expressed
AT1G20720.2	53	38	52	38	-0.471843	RAD3-like DNA-binding helicase protein		PF06733,PF13307	PTHR11472,PTHR11472:SF6		GO:0005524,GO:0004003,GO:0003677,GO:0016818,GO:0008026,GO:0006139,GO:0003676	LOC_Os09g37920.1	helicase, putative, expressed
AT1G20730.1	320	343	318	344	0.113596	transport/golgi organization-like protein, putative (DUF833)		PF05742	PTHR17985,PTHR17985:SF13	KOG2342		LOC_Os09g15480.1	Ser/Thr-rich protein T10 in DGCR region, putative, expressed
AT1G20735.1	42	14	42	14	-1.62427	F-box and associated interaction domains-containing protein		PF00646	PTHR31264,PTHR31264:SF2		GO:0005515
AT1G20740.1	56	69	56	69	0.304264	transport/golgi organization-like protein (DUF833)		PF05742	PTHR17985,PTHR17985:SF13	KOG2342		LOC_Os04g47680.1	Ser/Thr-rich protein T10 in DGCR region, putative, expressed
AT1G20760.1	851	718	846	721	-0.23085	Calcium-binding EF hand family protein		PF13202,PF12763	PTHR11216,PTHR11216:SF72		GO:0005509	LOC_Os03g03830.1	EF hand family protein, putative, expressed
AT1G20770.1	131	196	130	197	0.59472	coiled-coil protein			PTHR31996,PTHR31996:SF2			LOC_Os04g43040.1	expressed protein
AT1G20780.1	132	298	131	299	1.18584	senescence-associated E3 ubiquitin ligase 1	SAUL1	PF00514,PF04564	PTHR22849,PTHR22849:SF4		GO:0005515,GO:0016567,GO:0004842	LOC_Os12g17900.1	armadillo/beta-catenin repeat family protein, putative, expressed
AT1G20795.1	12	8	12	8	-0.663921	F-box family protein			PTHR32133			LOC_Os01g07160.1	OsFBX3 - F-box domain containing protein, expressed
AT1G20810.1	209	211	207	212	0.0307839	FKBP-like peptidyl-prolyl cis-trans isomerase family protein		PF00254	PTHR10516,PTHR10516:SF319	KOG0552	GO:0006457	LOC_Os02g02550.1	peptidyl-prolyl cis-trans isomerase, FKBP-type, putative, expressed
AT1G20816.1	56	41	56	41	-0.436341	outer envelope pore-like protein			PTHR35993			LOC_Os02g58550.1	chloroplast channel forming outer membrane protein, putative, expressed
AT1G20823.1	235	178	234	178	-0.391364	RING/U-box superfamily protein		PF13639	PTHR14155,PTHR14155:SF187	KOG1493	GO:0008270,GO:0005515	LOC_Os02g46100.1	RING-H2 finger protein, putative, expressed
AT1G20830.1	39	29	39	29	-0.413668	multiple chloroplast division site 1	MCD1		PTHR36317,PTHR36317:SF1			LOC_Os04g49540.1	expressed protein
AT1G20840.1	13	7	12	7	-0.93054	tonoplast monosaccharide transporter1	TMT1	PF07690,PF00083	PTHR23500,PTHR23500:SF8	KOG0255,KOG0569	GO:0055085,GO:0016021,GO:0022857	LOC_Os02g13560.2	transporter family protein, putative, expressed
AT1G20850.1	784	799	779	802	0.0416558	xylem cysteine peptidase 2	XCP2	PF08246,PF00112	PTHR12411,PTHR12411:SF353	KOG1543	GO:0008234,GO:0006508	LOC_Os05g01810.1	xylem cysteine proteinase 2 precursor, putative, expressed
AT1G20870.1	64	41	63	41	-0.635472	HSP20-like chaperones superfamily protein			PTHR34661,PTHR34661:SF1
AT1G20880.1	20	22	20	22	0.150263	RNA-binding (RRM/RBD/RNP motifs) family protein		PF00076	PTHR24012,PTHR24012:SF421	KOG0149	GO:0003676	LOC_Os06g41790.1	RNA recognition motif containing protein, putative, expressed
AT1G20890.1	67	53	67	53	-0.324869	caveolin-1 protein			PTHR35465			LOC_Os03g58930.1	expressed protein
AT1G20910.1	129	133	128	133	0.0577081	ARID/BRIGHT DNA-binding domain-containing protein		PF01388	PTHR15348,PTHR15348:SF6	KOG2744	GO:0003677	LOC_Os06g41730.1	ARID/BRIGHT DNA-binding domain-containing protein, putative, expressed
AT1G20920.1	147	136	146	136	-0.0994822	P-loop containing nucleoside triphosphate hydrolases superfamily protein		PF00271,PF00270	PTHR24031,PTHR24031:SF25		GO:0005524,GO:0003676	LOC_Os08g06344.2	transposon protein, putative, CACTA, En/Spm sub-class, expressed
AT1G20923.1	11	6	11	6	-0.984313	hypothetical protein
AT1G20925.1	3	5	3	5	0.748055	Auxin efflux carrier family protein		PF03547	PTHR31651,PTHR31651:SF5	KOG2722	GO:0055085,GO:0016021	LOC_Os09g31478.1	auxin efflux carrier component, putative, expressed
AT1G20930.1	133	134	132	134	0.0241332	cyclin-dependent kinase B2;2	CDKB2;2	PF00069	PTHR24056,PTHR24056:SF178	KOG0594	GO:0006468,GO:0005524,GO:0004672	LOC_Os08g40170.1	cyclin-dependent kinase B2-1, putative, expressed
AT1G20940.1	16	16	16	16	0.013694	F-box family protein		PF00646	PTHR31264,PTHR31264:SF2		GO:0005515
AT1G20950.1	800	786	795	789	-0.0110902	Phosphofructokinase family protein		PF00365	PTHR13697,PTHR13697:SF1		GO:0006096,GO:0003872	LOC_Os06g22060.1	pyrophosphate--fructose 6-phosphate 1-phosphotransferase subunit alpha, putative, expressed
AT1G20960.1	199	197	198	197	-0.00479347	U5 small nuclear ribonucleoprotein helicase	emb1507	PF00271,PF00270,PF02889	PTHR24075		GO:0005524,GO:0003676,GO:0031204,GO:0008565	LOC_Os02g01740.1	U5 small nuclear ribonucleoprotein 200 kDa helicase, putative, expressed
AT1G20970.1	1570	1857	1561	1864	0.255762	calponin-like domain protein			PTHR32219,PTHR32219:SF6			LOC_Os08g40250.1	expressed protein
AT1G20980.1	1711	1440	1701	1445	-0.235392	squamosa promoter binding protein-like 14	SPL14	PF03110	PTHR31251,PTHR31251:SF3		GO:0005634,GO:0003677	LOC_Os08g40260.1	OsSPL15 - SBP-box gene family member, expressed
AT1G20990.1	19	21	18	21	0.196356	Cysteine/Histidine-rich C1 domain family protein		PF03107,PF07649	PTHR13871,PTHR13871:SF43		GO:0055114,GO:0047134	LOC_Os09g31980.1	DC1 domain-containing protein, putative, expressed
AT1G21000.1	70	40	69	40	-0.801567	PLATZ transcription factor family protein		PF04640	PTHR31065,PTHR31065:SF12			LOC_Os06g41930.2	zinc-binding protein, putative, expressed
AT1G21010.1	27	20	27	20	-0.419497	poly polymerase		PF14009	PTHR33052,PTHR33052:SF15			LOC_Os06g41940.1	expressed protein
AT1G21050.2	114	98	113	98	-0.198476	MIZU-KUSSEI-like protein (Protein of unknown function, DUF617)		PF04759	PTHR31276,PTHR31276:SF3			LOC_Os01g59200.1	DUF617 domain containing protein, expressed
AT1G21060.1	38	33	38	33	-0.189801	Serine/Threonine-kinase, putative (Protein of unknown function, DUF547)		PF14389,PF04784	PTHR23054,PTHR23054:SF15			LOC_Os09g32010.1	ternary complex factor MIP1, putative, expressed
AT1G21065.1	470	563	467	565	0.274219	secondary thiamine-phosphate synthase enzyme		PF01894	PTHR30615,PTHR30615:SF1	KOG3267		LOC_Os02g09460.1	GA16396-PA, putative, expressed
AT1G21070.1	150	168	149	168	0.177455	Nucleotide-sugar transporter family protein		PF03151	PTHR11132	KOG1441		LOC_Os07g39280.1	transporter-related, putative, expressed
AT1G21080.3	216	235	215	235	0.131944	DNAJ heat shock N-terminal domain-containing protein		PF00226,PF14308	PTHR24078,PTHR24078:SF219	KOG0691		LOC_Os08g41110.1	chaperone protein dnaJ 10, putative, expressed
AT1G21090.1	295	268	293	269	-0.125251	Cupredoxin superfamily protein			PTHR34662,PTHR34662:SF3			LOC_Os01g73270.1	expressed protein
AT1G21110.1	4	3	4	3	-0.401575	O-methyltransferase family protein	IGMT3	PF08100,PF00891	PTHR11746,PTHR11746:SF63	KOG3178	GO:0046983,GO:0008171	LOC_Os08g06100.1	O-methyltransferase, putative, expressed
AT1G21120.2	6	2	6	2	-1.98844	O-methyltransferase family protein	IGMT2	PF08100,PF00891	PTHR11746,PTHR11746:SF63	KOG3178	GO:0046983,GO:0008171	LOC_Os08g06100.1	O-methyltransferase, putative, expressed
AT1G21130.1	15	7	14	7	-1.14439	O-methyltransferase family protein	IGMT4	PF08100,PF00891	PTHR11746,PTHR11746:SF63	KOG3178	GO:0046983,GO:0008171	LOC_Os08g06100.1	O-methyltransferase, putative, expressed
AT1G21140.1	21	10	21	10	-1.13003	Vacuolar iron transporter (VIT) family protein		PF01988	PTHR31851,PTHR31851:SF15	KOG4473		LOC_Os04g59020.1	integral membrane protein, putative, expressed
AT1G21150.2	43	24	43	24	-0.827517	Mitochondrial transcription termination factor family protein		PF02536	PTHR13068,PTHR13068:SF28	KOG1267	GO:0006355,GO:0005739,GO:0003690	LOC_Os07g24090.1	mTERF domain containing protein, expressed
AT1G21160.1	332	236	330	237	-0.476897	eukaryotic translation initiation factor 2 (eIF-2) family protein		PF01926,PF03144,PF11987	PTHR23115,PTHR23115:SF186		GO:0005525	LOC_Os05g51500.1	eukaryotic translation initiation factor 5B, putative, expressed
AT1G21170.2	319	290	317	291	-0.123944	Exocyst complex component SEC5	SEC5B	PF15469	PTHR13043		GO:0006893,GO:0000145	LOC_Os04g34450.1	expressed protein
AT1G21190.1	197	171	196	171	-0.195012	Small nuclear ribonucleoprotein family protein	LSM3A	PF01423	PTHR13110	KOG3460		LOC_Os01g64690.1	LSM domain containing protein, expressed
AT1G21200.1	92	84	91	84	-0.109832	sequence-specific DNA binding transcription factor		PF13837	PTHR21654,PTHR21654:SF11			LOC_Os12g06640.1	homeodomain, putative, expressed
AT1G21210.1	10	6	10	6	-0.723874	wall associated kinase 4	WAK4	PF07645,PF13947,PF07714	PTHR27005,PTHR27005:SF32	KOG1187	GO:0005509,GO:0030247,GO:0006468,GO:0004672	LOC_Os02g41500.1	OsWAK13 - OsWAK receptor-like protein kinase, expressed
AT1G21240.1	6	4	6	4	-0.765576	wall associated kinase 3	WAK3	PF07645,PF13947,PF07714	PTHR27005,PTHR27005:SF32	KOG1187	GO:0005509,GO:0030247,GO:0006468,GO:0004672	LOC_Os02g02120.1	OsWAK11 - OsWAK receptor-like protein kinase, expressed
AT1G21250.1	152	153	151	154	0.027614	cell wall-associated kinase	WAK1	PF07645,PF13947,PF07714	PTHR27005,PTHR27005:SF32	KOG1187	GO:0005509,GO:0030247,GO:0006468,GO:0004672	LOC_Os02g02120.1	OsWAK11 - OsWAK receptor-like protein kinase, expressed
AT1G21270.1	131	166	130	167	0.354931	wall-associated kinase 2	WAK2	PF07645,PF13947,PF07714	PTHR27005,PTHR27005:SF32	KOG1187	GO:0005509,GO:0030247,GO:0006468,GO:0004672	LOC_Os02g02120.1	OsWAK11 - OsWAK receptor-like protein kinase, expressed
AT1G21280.1	79	83	78	83	0.0848951	Copia-like polyprotein/retrotransposon		PF03732	PTHR37610,PTHR37610:SF1			ChrUn.fgenesh.mRNA.8	expressed protein
AT1G21310.1	572	510	568	512	-0.152175	extensin 3	EXT3	PF04554			GO:0009664,GO:0005199
AT1G21313.1	304	295	302	296	-0.0298693	transmembrane protein
AT1G21340.1	3	4	3	4	0.4285	Dof-type zinc finger DNA-binding family protein		PF02701	PTHR31992		GO:0006355,GO:0003677	LOC_Os01g64590.1	dof zinc finger domain containing protein, putative, expressed
AT1G21350.5	141	146	140	146	0.0585834	Thioredoxin superfamily protein		PF00578	PTHR10681,PTHR10681:SF91		GO:0055114,GO:0016491,GO:0016209	LOC_Os07g15670.1	peroxiredoxin, putative, expressed
AT1G21370.1	172	222	171	223	0.381511	transmembrane protein		PF02698	PTHR28110,PTHR28110:SF1	KOG4533		LOC_Os04g35780.1	expressed protein
AT1G21380.1	471	474	468	475	0.0226105	Target of Myb protein 1		PF03127,PF00790	PTHR13856,PTHR13856:SF95	KOG1087	GO:0006886,GO:0005622	LOC_Os11g09329.1	VHS and GAT domain containing protein, expressed
AT1G21390.1	25	35	24	35	0.527949	embryo defective 2170	emb2170		PTHR34193,PTHR34193:SF1			LOC_Os11g09350.1	expressed protein
AT1G21395.1	142	185	141	185	0.391234	transmembrane protein
AT1G21410.1	67	60	66	60	-0.13469	F-box/RNI-like superfamily protein	SKP2A	PF00646	PTHR24006	KOG1947	GO:0005515	LOC_Os05g35110.1	OsFBL22 - F-box domain and LRR containing protein, expressed
AT1G21430.1	2	10	2	10	2.26109	Flavin-binding monooxygenase family protein	YUC11	PF00743	PTHR23023,PTHR23023:SF121	KOG1399	GO:0055114,GO:0050661,GO:0050660,GO:0004499	LOC_Os12g08780.1	flavin monooxygenase, putative, expressed
AT1G21440.1	570	508	566	510	-0.151363	Phosphoenolpyruvate carboxylase family protein		PF00463	PTHR21631,PTHR21631:SF4	KOG1260	GO:0019752,GO:0004451	LOC_Os12g08760.1	carboxyvinyl-carboxyphosphonate phosphorylmutase, putative, expressed
AT1G21450.1	160	163	159	163	0.0359295	SCARECROW-like 1	SCL1	PF03514	PTHR31636,PTHR31636:SF10			LOC_Os01g65900.1	chitin-inducible gibberellin-responsive protein, putative, expressed
AT1G21460.1	574	404	570	406	-0.492034	Nodulin MtN3 family protein	SWEET1	PF03083	PTHR10791,PTHR10791:SF44	KOG1623		LOC_Os01g65880.1	nodulin MtN3 family protein, putative, expressed
AT1G21470.1	7	7	7	7	0.0126493	hypothetical protein
AT1G21475.1	88	90	88	90	0.0456941	hypothetical protein (DUF506)		PF04720
AT1G21480.1	220	213	219	214	-0.0330571	Exostosin family protein		PF03016	PTHR11062,PTHR11062:SF44	KOG1021		LOC_Os04g32670.1	exostosin family domain containing protein, expressed
AT1G21500.1	1124	1413	1118	1419	0.343592	hypothetical protein			PTHR37182			LOC_Os09g34140.1	expressed protein
AT1G21520.1	6	26	5	26	2.22601	hypothetical protein
AT1G21550.1	17	5	17	5	-1.75207	Calcium-binding EF-hand family protein		PF13499,PF00036	PTHR10891,PTHR10891:SF530	KOG0027	GO:0005509	LOC_Os02g39380.1	OsCML17 - Calmodulin-related calcium sensor protein, expressed
AT1G21560.2	14	8	13	8	-0.832711	hypothetical protein			PTHR34194,PTHR34194:SF3			LOC_Os04g14410.1	expressed protein
AT1G21580.1	179	200	178	200	0.16989	Zinc finger C-x8-C-x5-C-x3-H type family protein			PTHR23102,PTHR23102:SF13			LOC_Os06g43120.1	zinc finger C-x8-C-x5-C-x3-H type family protein, expressed
AT1G21590.1	434	352	432	353	-0.290806	kinase with adenine nucleotide alpha hydrolases-like domain-containing protein		PF00582,PF00069	PTHR27001,PTHR27001:SF44	KOG1187	GO:0006950,GO:0006468,GO:0005524,GO:0004672	LOC_Os03g62340.1	protein kinase family protein, putative, expressed
AT1G21600.1	381	364	379	365	-0.0543266	plastid transcriptionally active 6	PTAC6		PTHR35994			LOC_Os11g01890.1	expressed protein
AT1G21610.3	232	234	231	234	0.0227319	wound-responsive family protein		PF08729	PTHR21669,PTHR21669:SF13			LOC_Os05g34900.1	wound-responsive family protein, putative, expressed
AT1G21630.2	1681	1455	1672	1460	-0.195335	Calcium-binding EF hand family protein		PF13202,PF12763	PTHR11216,PTHR11216:SF61	KOG0998	GO:0005509	LOC_Os06g51250.1	EF hand family protein, putative, expressed
AT1G21640.2	197	152	195	152	-0.361871	NAD kinase 2	NADK2	PF01513	PTHR20275,PTHR20275:SF6	KOG2178	GO:0008152,GO:0006741,GO:0003951	LOC_Os11g08670.1	NAD kinase, putative, expressed
AT1G21650.3	257	240	256	240	-0.0882541	Preprotein translocase SecA family protein	SECA2	PF13639,PF00400,PF01043,PF07516,PF07517	PTHR30612,PTHR30612:SF5	KOG1332,KOG0315,KOG0279,KOG0266	GO:0008270,GO:0005515,GO:0017038,GO:0016020,GO:0005524	LOC_Os11g08980.1	preprotein translocase secA family protein, putative, expressed
AT1G21651.1	130	124	129	124	-0.0490436	zinc ion binding protein		PF13639,PF00400	PTHR22844,PTHR22844:SF215	KOG0315,KOG0279	GO:0008270,GO:0005515	LOC_Os05g34880.1	zinc finger, C3HC4 type family protein, expressed
AT1G21660.1	662	615	658	617	-0.0940051	Chaperone DnaJ-domain superfamily protein			PTHR23172	KOG0431		LOC_Os11g43950.1	dnaJ domain containing protein, expressed
AT1G21670.1	350	199	348	199	-0.802739	DPP6 amino-terminal domain protein		PF07676	PTHR32161,PTHR32161:SF8			LOC_Os03g62370.1	WD40-like Beta Propeller Repeat family protein, expressed
AT1G21680.1	543	292	540	293	-0.882632	DPP6 N-terminal domain-like protein		PF07676	PTHR32161,PTHR32161:SF8			LOC_Os03g62370.1	WD40-like Beta Propeller Repeat family protein, expressed
AT1G21690.3	51	81	50	81	0.695361	ATPase family associated with various cellular activities (AAA)	EMB1968	PF08542,PF00004	PTHR11669,PTHR11669:SF17	KOG0989	GO:0005524	LOC_Os12g07720.1	RFC4 - Putative clamp loader of PCNA, replication factor C subunit 4, expressed
AT1G21695.1	46	36	46	36	-0.340017	hydroxyproline-rich glycoprotein family protein			PTHR35466,PTHR35466:SF2			LOC_Os03g62330.1	expressed protein
AT1G21700.1	429	401	426	403	-0.0822973	SWITCH/sucrose nonfermenting 3C	SWI3C	PF00249,PF04433,PF16495	PTHR12802,PTHR12802:SF41		GO:0005515	LOC_Os11g08080.1	SWIRM domain containing protein, expressed
AT1G21710.1	132	123	131	123	-0.0943268	8-oxoguanine-DNA glycosylase 1	OGG1	PF00730,PF07934	PTHR10242,PTHR10242:SF2	KOG2875	GO:0006284,GO:0008534,GO:0006289,GO:0003684	LOC_Os02g34750.2	leucine-rich repeat receptor-like protein kinase 1, putative, expressed
AT1G21720.1	870	927	865	930	0.104992	proteasome beta subunit C1	PBC1	PF00227	PTHR11599,PTHR11599:SF62	KOG0180	GO:0051603,GO:0005839,GO:0004298	LOC_Os06g43570.1	peptidase, T1 family, putative, expressed
AT1G21730.1	172	199	171	199	0.220229	P-loop containing nucleoside triphosphate hydrolases superfamily protein		PF00225	PTHR24115,PTHR24115:SF487	KOG0242	GO:0008017,GO:0007018,GO:0005524,GO:0003777,GO:0005871	LOC_Os02g53520.1	kinesin motor domain containing protein, putative, expressed
AT1G21740.1	164	137	163	138	-0.246144	DUF630 family protein, putative (DUF630 and DUF632)		PF04783,PF04782	PTHR21450,PTHR21450:SF8			LOC_Os05g35070.1	DUF630/DUF632 domains containing protein, putative, expressed
AT1G21750.1	853	1103	848	1107	0.384156	PDI-like 1-1	PDIL1-1	PF13098,PF13848,PF00085	PTHR18929,PTHR18929:SF108		GO:0045454	LOC_Os11g09280.2	OsPDIL1-1 protein disulfide isomerase PDIL1-1, expressed
AT1G21760.1	196	151	194	151	-0.363971	F-box protein 7	FBP7	PF12937	PTHR12874	KOG2997	GO:0005515	LOC_Os04g35190.1	OsFBX133 - F-box domain containing protein, expressed
AT1G21770.1	236	247	235	248	0.0791708	Acyl-CoA N-acyltransferases (NAT) superfamily protein		PF14542	PTHR31435			LOC_Os04g35200.1	expressed protein
AT1G21780.1	384	411	382	413	0.111547	BTB/POZ domain-containing protein		PF00651	PTHR24413,PTHR24413:SF85		GO:0005515	LOC_Os08g01320.2	C3-BTB1 - Bric-a-Brac, Tramtrack, Broad Complex BTB domain with C3 subfamily conserved sequence, expressed
AT1G21790.1	158	122	157	122	-0.365483	TRAM, LAG1 and CLN8 (TLC) lipid-sensing domain containing protein		PF03798	PTHR13439,PTHR13439:SF4	KOG4474	GO:0016021	LOC_Os01g64930.1	expressed protein
AT1G21810.1	5	2	5	2	-1.30772	filament-like protein (DUF869)		PF05911	PTHR31580,PTHR31580:SF2			LOC_Os07g32340.1	retrotransposon protein, putative, unclassified, expressed
AT1G21830.1	184	228	183	228	0.319616	hypothetical protein		PF05340	PTHR35995			LOC_Os04g59420.2	expressed protein
AT1G21840.1	70	61	70	61	-0.185267	urease accessory protein F	UREF	PF01730	PTHR33620,PTHR33620:SF1		GO:0016151,GO:0006807	LOC_Os02g07150.1	urease accessory protein F, putative, expressed
AT1G21850.1	987	1042	982	1046	0.0916813	SKU5 similar 8	sks8	PF07731,PF07732,PF00394	PTHR11709,PTHR11709:SF90		GO:0055114,GO:0016491,GO:0005507	LOC_Os04g47400.1	monocopper oxidase, putative, expressed
AT1G21880.2	580	668	577	670	0.216158	lysm domain GPI-anchored protein 1 precursor	LYM1	PF01476	PTHR33734,PTHR33734:SF3			LOC_Os06g10660.1	lysM domain-containing GPI-anchored protein 1 precursor, putative, expressed
AT1G21890.1	10	9	10	9	-0.137909	nodulin MtN21 /EamA-like transporter family protein	UMAMIT19	PF00892	PTHR31218,PTHR31218:SF12		GO:0016021,GO:0016020,GO:0022857	LOC_Os05g33900.1	auxin-induced protein 5NG4, putative, expressed
AT1G21900.1	260	322	259	323	0.322075	emp24/gp25L/p24 family/GOLD family protein	p24delta5	PF01105	PTHR22811,PTHR22811:SF68	KOG1691	GO:0016021,GO:0006810	LOC_Os02g52920.1	emp24/gp25L/p24 family protein, putative, expressed
AT1G21910.1	109	78	108	78	-0.469242	Integrase-type DNA-binding superfamily protein	DREB26	PF00847	PTHR31985,PTHR31985:SF8		GO:0006355,GO:0003700	LOC_Os03g15660.1	AP2 domain containing protein, expressed
AT1G21920.1	135	250	134	250	0.904861	Histone H3 K4-specific methyltransferase SET7/9 family protein		PF02493	PTHR23084,PTHR23084:SF145	KOG0231		LOC_Os09g28060.1	MORN repeat domain containing protein, expressed
AT1G21930.1	84	96	84	96	0.198515	transmembrane protein			PTHR35691			LOC_Os12g29670.1	expressed protein
AT1G21950.1	13	15	13	15	0.220292	transmembrane protein
AT1G21970.1	11	7	11	7	-0.638277	Histone superfamily protein	LEC1	PF00808	PTHR11064,PTHR11064:SF20	KOG0869		LOC_Os02g49370.1	histone-like transcription factor and archaeal histone, putative, expressed
AT1G21980.1	717	776	713	779	0.127595	phosphatidylinositol-4-phosphate 5-kinase 1	PIP5K1	PF02493,PF01504	PTHR23086,PTHR23086:SF33		GO:0046488,GO:0016307	LOC_Os03g49800.1	phosphatidylinositol-4-phosphate 5-kinase, putative, expressed
AT1G22015.1	105	67	104	67	-0.627825	Galactosyltransferase family protein	DD46	PF02434,PF13334	PTHR11214,PTHR11214:SF74	KOG2288	GO:0016757,GO:0016020,GO:0008378,GO:0006486	LOC_Os02g35870.2	galactosyltransferase, putative, expressed
AT1G22020.1	308	227	306	227	-0.427546	serine hydroxymethyltransferase 6	SHM6	PF00464	PTHR11680,PTHR11680:SF7		GO:0016740	LOC_Os01g65410.1	serine hydroxymethyltransferase, mitochondrial precursor, putative, expressed
AT1G22030.1	156	147	155	148	-0.067779	BPS1-like protein		PF05633	PTHR31509,PTHR31509:SF2			LOC_Os08g01400.1	expressed protein
AT1G22040.1	168	128	167	129	-0.378833	Galactose oxidase/kelch repeat superfamily protein		PF12937,PF01344	PTHR24414,PTHR24414:SF39		GO:0005515	LOC_Os10g21930.1	OsFBK21 - F-box domain and kelch repeat containing protein, expressed
AT1G22050.1	40	44	39	44	0.153056	membrane-anchored ubiquitin-fold protein 6 precursor	MUB6	PF13881	PTHR13169			LOC_Os02g51500.2	membrane-anchored ubiquitin-fold protein, putative, expressed
AT1G22060.1	139	175	138	176	0.350761	sporulation-specific protein		PF10358	PTHR34452,PTHR34452:SF1	KOG4674		LOC_Os10g21940.1	expressed protein
AT1G22065.1	32	50	32	50	0.642647	hypothetical protein
AT1G22070.1	155	150	154	150	-0.0387033	transcription factor TGA3	TGA3	PF07716,PF14144	PTHR22952,PTHR22952:SF203		GO:0043565,GO:0006355,GO:0003700,GO:0006351	LOC_Os04g54474.1	transcription factor, putative, expressed
AT1G22090.1	19	18	19	18	-0.0650514	hypothetical protein	emb2204	PF04776	PTHR31260,PTHR31260:SF28
AT1G22100.1	8	5	8	5	-0.817245	Inositol-pentakisphosphate 2-kinase family protein		PF06090	PTHR14456		GO:0035299,GO:0005524	LOC_Os04g56580.1	inositol 1,3,4,5,6-pentakisphosphate 2-kinase, putative, expressed
AT1G22110.1	28	44	27	44	0.691472	structural constituent of ribosome		PF11250	PTHR33155,PTHR33155:SF12			LOC_Os02g33090.1	expressed protein
AT1G22120.1	28	17	27	17	-0.680167	hypothetical protein
AT1G22140.1	150	121	149	121	-0.297902	zinc finger CCCH domain protein			PTHR12681			LOC_Os03g26791.1	expressed protein
AT1G22160.1	980	917	975	920	-0.0832387	senescence-associated family protein (DUF581)		PF04570	PTHR33059,PTHR33059:SF4			LOC_Os08g31510.1	DUF581 domain containing protein, expressed
AT1G22170.1	61	78	61	78	0.368054	Phosphoglycerate mutase family protein		PF00300	PTHR11931,PTHR11931:SF6	KOG0235	GO:0016868,GO:0006096,GO:0004619	LOC_Os02g51590.1	phosphoglycerate mutase, putative, expressed
AT1G22180.2	74	65	73	65	-0.163215	Sec14p-like phosphatidylinositol transfer family protein		PF13716	PTHR10174,PTHR10174:SF148	KOG1470		LOC_Os02g51610.1	CRAL/TRIO domain containing protein, expressed
AT1G22190.1	236	139	234	139	-0.752458	Integrase-type DNA-binding superfamily protein		PF00847	PTHR31657,PTHR31657:SF9		GO:0006355,GO:0003700	LOC_Os02g51670.1	ethylene-responsive transcription factor, putative, expressed
AT1G22200.1	225	229	224	229	0.0357685	Endoplasmic reticulum vesicle transporter protein		PF13850,PF07970	PTHR10984,PTHR10984:SF35	KOG2667		LOC_Os04g38340.1	endoplasmic reticulum-Golgi intermediate compartment protein 3, putative, expressed
AT1G22210.1	57	54	56	54	-0.0520727	Haloacid dehalogenase-like hydrolase (HAD) superfamily protein	TPPC	PF02358	PTHR10788,PTHR10788:SF26		GO:0005992,GO:0003824	LOC_Os02g51680.1	uncharacterized glycosyl hydrolase Rv2006/MT2062, putative, expressed
AT1G22220.1	9	5	8	5	-0.751418	F-box family protein	AUF2		PTHR31215,PTHR31215:SF6			LOC_Os01g59690.1	OsFBX28 - F-box domain containing protein, expressed
AT1G22230.1	35	29	34	29	-0.237331	nucleolar GTP-binding protein			PTHR33448,PTHR33448:SF3			LOC_Os02g51720.1	expressed protein
AT1G22240.1	35	109	34	109	1.67323	pumilio 8	PUM8	PF00806	PTHR12537,PTHR12537:SF64	KOG2049	GO:0003723	LOC_Os12g31000.1	pumilio-family RNA binding repeat domain containing protein, expressed
AT1G22250.1	72	93	72	93	0.382757	hypothetical protein						LOC_Os03g09120.1	expressed protein
AT1G22260.1	19	7	18	7	-1.49589	Myosin heavy chain-related protein	ZYP1a		PTHR23160,PTHR23160:SF3			LOC_Os04g37960.1	synaptonemal complex protein 2, putative, expressed
AT1G22270.1	162	191	161	191	0.251707	Trm112p-like protein		PF03966	PTHR12773,PTHR12773:SF0	KOG1088		LOC_Os07g43020.1	TRM112, putative, expressed
AT1G22275.1	6	5	5	5	-0.123704	Myosin heavy chain-related protein	ZYP1b		PTHR23160,PTHR23160:SF3			LOC_Os04g37960.1	synaptonemal complex protein 2, putative, expressed
AT1G22280.3	173	270	172	271	0.655926	phytochrome-associated protein phosphatase type 2C	PAPP2C	PF07228	PTHR13832,PTHR13832:SF314	KOG0698	GO:0003824,GO:0006470,GO:0004722	LOC_Os04g37904.1	protein phosphatase 2C, putative, expressed
AT1G22300.1	812	969	807	973	0.269463	general regulatory factor 10	GRF10	PF00244	PTHR18860	KOG0841	GO:0019904	LOC_Os08g33370.2	14-3-3 protein, putative, expressed
AT1G22310.2	118	137	117	137	0.223639	methyl-CPG-binding domain 8	MBD8	PF02178,PF01429	PTHR37701,PTHR37701:SF1		GO:0003677,GO:0005634	LOC_Os09g29750.1	ZOS9-15 - C2H2 zinc finger protein, expressed
AT1G22330.1	162	304	161	305	0.923639	RNA-binding (RRM/RBD/RNP motifs) family protein		PF00076	PTHR24012,PTHR24012:SF421	KOG0149	GO:0003676	LOC_Os02g51890.1	RNA recognition motif containing protein, putative, expressed
AT1G22360.1	13	26	13	26	0.985336	UDP-glucosyl transferase 85A2	UGT85A2	PF00201	PTHR11926,PTHR11926:SF233	KOG1192	GO:0016758,GO:0008152	LOC_Os02g51910.1	cytokinin-O-glucosyltransferase 2, putative, expressed
AT1G22400.1	5	12	5	12	1.2765	UDP-Glycosyltransferase superfamily protein	UGT85A1	PF00201	PTHR11926,PTHR11926:SF233		GO:0016758,GO:0008152	LOC_Os02g51930.1	cytokinin-O-glucosyltransferase 2, putative, expressed
AT1G22410.1	2776	2651	2761	2661	-0.0532761	Class-II DAHP synthetase family protein		PF01474	PTHR21337,PTHR21337:SF6		GO:0009073,GO:0003849	LOC_Os03g27230.1	phospho-2-dehydro-3-deoxyheptonate aldolase, chloroplast precursor, putative, expressed
AT1G22420.1	5	3	5	3	-0.723503	hydroxyproline-rich glycoprotein family protein
AT1G22430.1	40	62	40	62	0.646098	GroES-like zinc-binding dehydrogenase family protein		PF00107,PF08240	PTHR11695,PTHR11695:SF492		GO:0055114,GO:0016491,GO:0008270	LOC_Os07g42924.1	dehydrogenase, putative, expressed
AT1G22440.1	31	24	31	24	-0.355652	Zinc-binding alcohol dehydrogenase family protein		PF00107,PF08240	PTHR11695,PTHR11695:SF492		GO:0055114,GO:0016491,GO:0008270	LOC_Os07g42924.1	dehydrogenase, putative, expressed
AT1G22450.1	1015	1153	1010	1158	0.197367	cytochrome C oxidase 6B	COX6B	PF02297	PTHR11387,PTHR11387:SF15	KOG3057	GO:0005739,GO:0004129	LOC_Os03g27290.1	cytochrome c oxidase subunit, putative, expressed
AT1G22460.1	64	75	63	75	0.243861	O-fucosyltransferase family protein		PF10250	PTHR31741,PTHR31741:SF1			LOC_Os06g11600.3	growth regulator related protein, putative, expressed
AT1G22470.1	27	12	27	12	-1.15646	hypothetical protein			PTHR34046,PTHR34046:SF3			LOC_Os06g11510.1	expressed protein
AT1G22480.1	256	291	254	292	0.198646	Cupredoxin superfamily protein		PF02298	PTHR33021,PTHR33021:SF64		GO:0009055	LOC_Os06g11490.1	plastocyanin-like domain containing protein, putative, expressed
AT1G22490.2	29	28	28	28	-0.0378995	basic helix-loop-helix (bHLH) DNA-binding superfamily protein		PF00010	PTHR11969,PTHR11969:SF22		GO:0046983	LOC_Os03g08930.1	helix-loop-helix DNA-binding protein, putative, expressed
AT1G22500.1	6	15	5	15	1.4621	RING/U-box superfamily protein	ATL15	PF13639	PTHR14155		GO:0008270,GO:0005515	LOC_Os09g29310.1	zinc finger, C3HC4 type domain containing protein, expressed
AT1G22510.2	67	143	67	143	1.10192	E3 ubiquitin-protein ligase RNF170-like protein (DUF 1232)		PF06803	PTHR22894			LOC_Os03g62250.1	zinc finger, C3HC4 type domain containing protein, expressed
AT1G22520.2	180	211	179	212	0.246603	MICOS complex subunit Mic10-like protein (DUF543)		PF04418	PTHR21304,PTHR21304:SF0	KOG4604		LOC_Os03g62420.1	expressed protein
AT1G22530.1	253	914	252	917	1.86577	PATELLIN 2	PATL2	PF03765,PF00650	PTHR23324,PTHR23324:SF67	KOG1471		LOC_Os01g65380.1	patellin protein, putative, expressed
AT1G22540.1	73	52	72	52	-0.480027	Major facilitator superfamily protein		PF07690	PTHR11654,PTHR11654:SF94		GO:0055085,GO:0016021,GO:0016020,GO:0006810,GO:0005215	LOC_Os01g65110.1	POT family protein, expressed
AT1G22550.1	10	20	9	20	1.08766	Major facilitator superfamily protein		PF00854	PTHR11654,PTHR11654:SF94		GO:0016020,GO:0006810,GO:0005215	LOC_Os01g65100.1	peptide transporter, putative, expressed
AT1G22590.2	117	143	116	144	0.309052	AGAMOUS-like 87	AGL87	PF00319	PTHR11945,PTHR11945:SF158		GO:0046983,GO:0003677	LOC_Os01g18420.1	OsMADS88 - MADS-box family gene with M-gamma type-box, expressed
AT1G22610.1	1550	1165	1541	1169	-0.398629	C2 calcium/lipid-binding plant phosphoribosyltransferase family protein		PF06398,PF00168	PTHR10024,PTHR10024:SF197	KOG1013	GO:0005515	LOC_Os04g58720.1	anthranilate phosphoribosyltransferase, putative, expressed
AT1G22620.1	1830	1390	1820	1395	-0.383811	Phosphoinositide phosphatase family protein	ATSAC1	PF02383	PTHR11200,PTHR11200:SF136		GO:0042578	LOC_Os08g01750.2	SAC domain containing protein, putative, expressed
AT1G22630.1	215	203	213	203	-0.06948	SSUH2-like protein			PTHR15852,PTHR15852:SF18			LOC_Os05g01530.1	expressed protein
AT1G22640.1	216	201	214	202	-0.0871469	myb domain protein 3	MYB3	PF00249	PTHR10641,PTHR10641:SF643	KOG0048		LOC_Os09g36730.1	MYB family transcription factor, putative, expressed
AT1G22650.1	126	77	125	77	-0.700612	Plant neutral invertase family protein	A/N-InvD	PF12899	PTHR31916,PTHR31916:SF3		GO:0033926	LOC_Os02g34560.1	plant neutral invertase domain containing protein, expressed
AT1G22660.4	58	36	58	36	-0.67415	Polynucleotide adenylyltransferase family protein		PF01743	PTHR13734,PTHR13734:SF5	KOG2159	GO:0016779,GO:0006396,GO:0003723	LOC_Os12g07350.1	tRNA nucleotidyltransferase/polyA polymerase family protein, putative, expressed
AT1G22670.1	21	20	20	20	-0.0589238	Protease-associated (PA) RING/U-box zinc finger family protein		PF02225,PF13639	PTHR22765,PTHR22765:SF5	KOG4628	GO:0008270,GO:0005515	LOC_Os03g07130.1	RING finger protein 13, putative, expressed
AT1G22690.1	32	45	31	45	0.512028	Gibberellin-regulated family protein		PF02704	PTHR23201,PTHR23201:SF20			LOC_Os05g35690.1	GASR6 - Gibberellin-regulated GASA/GAST/Snakin family protein precursor, expressed
AT1G22700.1	265	200	264	200	-0.396171	Tetratricopeptide repeat (TPR)-like superfamily protein		PF13414	PTHR26312,PTHR26312:SF66			LOC_Os10g32300.1	tetratricopeptide repeat domain containing protein, expressed
AT1G22710.1	2930	2458	2914	2467	-0.239994	sucrose-proton symporter 2	SUC2	PF13347	PTHR19432,PTHR19432:SF38			LOC_Os12g44380.1	sucrose transporter, putativ, expressed
AT1G22730.1	306	308	304	309	0.0227999	MA3 domain-containing protein		PF02847	PTHR12626,PTHR12626:SF2			LOC_Os03g12180.1	MA3 domain containing protein, expressed
AT1G22740.1	62	186	62	186	1.59468	RAB GTPase homolog G3B	RABG3B	PF00025	PTHR24073,PTHR24073:SF589	KOG0394	GO:0005525	LOC_Os01g51700.1	ras-related protein, putative, expressed
AT1G22750.4	116	124	115	124	0.109845	transmembrane protein		PF07343	PTHR36318,PTHR36318:SF2			LOC_Os06g38320.2	expressed protein
AT1G22760.1	40	24	40	24	-0.723781	poly(A) binding protein 3	PAB3	PF00658,PF00076	PTHR24012,PTHR24012:SF349	KOG0123	GO:0003723,GO:0003676	LOC_Os09g02700.1	polyadenylate-binding protein, putative, expressed
AT1G22770.1	531	430	528	431	-0.291162	gigantea protein (GI)	GI		PTHR36319,PTHR36319:SF1			LOC_Os01g08700.2	GIGANTEA, putative, expressed
AT1G22780.1	1046	1258	1040	1263	0.27969	Ribosomal protein S13/S18 family	PFL	PF00416	PTHR10871,PTHR10871:SF6	KOG3311	GO:0006412,GO:0005840,GO:0005622,GO:0003735,GO:0003723	LOC_Os07g07709.1	ribosomal protein S13p/S18e, putative, expressed
AT1G22790.1	228	229	227	229	0.0165365	Low affinity potassium transport system protein			PTHR33401,PTHR33401:SF3			LOC_Os01g40700.1	expressed protein
AT1G22800.1	241	237	239	237	-0.0107628	S-adenosyl-L-methionine-dependent methyltransferases superfamily protein		PF08241	PTHR13090		GO:0008168,GO:0008152	LOC_Os12g10200.1	SAM-dependent methyltransferase, putative, expressed
AT1G22810.1	7	10	6	10	0.560337	Integrase-type DNA-binding superfamily protein		PF00847	PTHR31985,PTHR31985:SF3		GO:0006355,GO:0003700	LOC_Os01g66270.1	AP2 domain containing protein, expressed
AT1G22830.1	29	42	29	42	0.547799	Tetratricopeptide repeat (TPR)-like superfamily protein		PF13041,PF01535	PTHR24015,PTHR24015:SF517			LOC_Os07g19400.1	pentatricopeptide domain containing protein, putative, expressed
AT1G22840.1	720	860	716	863	0.268663	CYTOCHROME C-1	CYTC-1	PF00034	PTHR11961,PTHR11961:SF8	KOG3453	GO:0020037,GO:0009055	LOC_Os05g34770.1	cytochrome c, putative, expressed
AT1G22850.1	751	580	746	582	-0.359652	SNARE associated Golgi protein family		PF09335	PTHR12677,PTHR12677:SF5	KOG3140	GO:0016021	LOC_Os01g66170.1	SNARE associated Golgi protein, putative, expressed
AT1G22860.1	279	237	277	238	-0.219383	Vacuolar sorting protein 39		PF10366,PF00637,PF10367	PTHR12894,PTHR12894:SF17		GO:0016192,GO:0006886	LOC_Os05g01360.1	expressed protein
AT1G22870.1	33	13	33	13	-1.33027	kinase family with ARM repeat domain-containing protein		PF00069	PTHR12984,PTHR12984:SF6		GO:0006468,GO:0005524,GO:0004672	LOC_Os01g42950.1	protein kinase family protein, putative, expressed
AT1G22880.1	56	77	56	77	0.46345	cellulase 5	CEL5	PF00759	PTHR22298,PTHR22298:SF54		GO:0005975,GO:0004553	LOC_Os04g36610.1	endoglucanase, putative, expressed
AT1G22882.1	298	769	296	772	1.38018	Galactose-binding protein		PF07738	PTHR12953,PTHR12953:SF1	KOG1396		LOC_Os01g65520.1	Sad1 / UNC-like C-terminal domain containing protein, putative, expressed
AT1G22885.2	92	154	91	154	0.759937	transmembrane protein
AT1G22890.1	7	18	7	18	1.33523	transmembrane protein
AT1G22900.1	1	7	1	7	2.82	Disease resistance-responsive (dirigent-like protein) family protein		PF03018	PTHR21495,PTHR21495:SF71			LOC_Os11g07830.1	dirigent, putative, expressed
AT1G22910.3	612	917	609	920	0.596062	RNA-binding (RRM/RBD/RNP motifs) family protein		PF00076	PTHR24012,PTHR24012:SF421	KOG0149	GO:0003676	LOC_Os01g65550.1	RNA recognition motif containing protein, putative, expressed
AT1G22920.1	274	262	272	263	-0.0485619	COP9 signalosome 5A	CSN5A	PF01398	PTHR10410,PTHR10410:SF6		GO:0005515	LOC_Os04g56070.1	COP9 signalosome complex subunit 5b, putative, expressed
AT1G22930.1	503	453	500	455	-0.137504	T-complex protein 11		PF05794	PTHR12832,PTHR12832:SF11			LOC_Os04g35840.1	T-complex protein 11, putative, expressed
AT1G22940.1	209	150	207	151	-0.461631	thiamin biosynthesis protein	TH1	PF00294,PF02581	PTHR20858,PTHR20858:SF17		GO:0009228,GO:0004789	LOC_Os12g09000.1	phosphomethylpyrimidine kinase/thiamin-phosphate pyrophosphorylase, putative, expressed
AT1G22950.1	136	140	135	140	0.0555637	2-oxoglutarate (2OG) and Fe(II)-dependent oxygenase superfamily protein			PTHR24014,PTHR24014:SF4	KOG1971		LOC_Os01g31770.1	oxidoreductase, 2OG-Fe oxygenase family protein, putative, expressed
AT1G22960.1	111	105	110	105	-0.067146	Pentatricopeptide repeat (PPR) superfamily protein		PF13041	PTHR24015,PTHR24015:SF724			LOC_Os12g05640.1	pentatricopeptide containing protein, putative, expressed
AT1G22970.1	144	159	143	159	0.156879	cyclin-D1-binding protein		PF13324	PTHR15492,PTHR15492:SF1		GO:0051726	LOC_Os05g48070.1	expressed protein
AT1G22980.2	23	39	22	39	0.788848	Grap2/cyclin-D-interacting protein		PF13324	PTHR15492,PTHR15492:SF1		GO:0051726	LOC_Os05g48070.1	expressed protein
AT1G22985.1	26	18	26	18	-0.557572	Integrase-type DNA-binding superfamily protein	CRF7	PF00847	PTHR31194,PTHR31194:SF0		GO:0006355,GO:0003700	LOC_Os02g10760.1	AP2 domain containing protein, expressed
AT1G22990.1	6	6	6	6	0.0134623	Heavy metal transport/detoxification superfamily protein	HIPP22	PF00403	PTHR22814,PTHR22814:SF47	KOG1603	GO:0046872,GO:0030001	LOC_Os03g26650.2	heavy metal-associated domain containing protein, expressed
AT1G23000.2	12	14	11	14	0.244738	Heavy metal transport/detoxification superfamily protein		PF00403	PTHR22814,PTHR22814:SF150	KOG1603	GO:0046872,GO:0030001	LOC_Os01g03490.1	heavy-metal-associated domain-containing protein, putative, expressed
AT1G23010.1	1129	1011	1122	1015	-0.145186	Cupredoxin superfamily protein	LPR1	PF00394,PF07731	PTHR11709,PTHR11709:SF89		GO:0055114,GO:0016491,GO:0005507	LOC_Os01g03530.1	multicopper oxidase domain containing protein, expressed
AT1G23020.2	47	53	46	53	0.188072	ferric reduction oxidase 3	FRO3	PF01794,PF08022,PF08030	PTHR11972,PTHR11972:SF41	KOG0039	GO:0055114,GO:0016491	LOC_Os04g48930.4	ferric-chelate reductase, putative, expressed
AT1G23030.1	422	539	420	541	0.366517	ARM repeat superfamily protein		PF04564,PF00514	PTHR23315,PTHR23315:SF52		GO:0016567,GO:0004842,GO:0005515	LOC_Os02g49950.1	spotted leaf 11, putative, expressed
AT1G23040.1	332	359	330	360	0.128373	hydroxyproline-rich glycoprotein family protein			PTHR35094,PTHR35094:SF1
AT1G23050.1	50	87	49	87	0.827002	hydroxyproline-rich glycoprotein family protein			PTHR37702
AT1G23060.1	57	50	57	50	-0.175539	hypothetical protein	MDP40		PTHR31358,PTHR31358:SF2			LOC_Os12g17530.1	expressed protein
AT1G23070.1	24	13	24	13	-0.87106	organic solute transporter ostalpha protein (DUF300)		PF03619	PTHR23423,PTHR23423:SF23	KOG2641	GO:0009626	LOC_Os03g29340.1	domain of unknown function domain containing protein, expressed
AT1G23080.1	369	258	367	259	-0.505499	Auxin efflux carrier family protein	PIN7	PF03547	PTHR31752,PTHR31752:SF14		GO:0055085,GO:0016021	LOC_Os06g12610.1	auxin efflux carrier component, putative, expressed
AT1G23090.1	23	27	22	27	0.249834	sulfate transporter 91	AST91	PF01740,PF00916	PTHR11814,PTHR11814:SF93		GO:0016021,GO:0015116,GO:0008272,GO:0055085,GO:0016020,GO:0008271	LOC_Os04g55800.1	sulfate transporter, putative, expressed
AT1G23100.1	52	68	51	68	0.403699	GroES-like family protein		PF00166	PTHR10772,PTHR10772:SF9	KOG1641	GO:0006457,GO:0005737	LOC_Os03g25050.1	chaperonin, putative, expressed
AT1G23120.2	4	4	4	4	0.0134623	Polyketide cyclase/dehydrase and lipid transport superfamily protein		PF00407	PTHR31338,PTHR31338:SF15		GO:0009607,GO:0006952	LOC_Os08g28670.1	pathogenesis-related Bet v I family protein, putative, expressed
AT1G23130.1	20	14	20	14	-0.553182	Polyketide cyclase/dehydrase and lipid transport superfamily protein		PF00407	PTHR31907,PTHR31907:SF4		GO:0009607,GO:0006952	LOC_Os04g39150.1	pathogenesis-related Bet v I family protein, putative, expressed
AT1G23140.1	30	37	30	37	0.296318	Calcium-dependent lipid-binding (CaLB domain) family protein		PF00168	PTHR23180,PTHR23180:SF285	KOG1030	GO:0005515	LOC_Os02g22130.1	expressed protein
AT1G23145.1	121	121	120	121	0.0134706	RALF-like 2	RALFL2	PF05498	PTHR34270,PTHR34270:SF1
AT1G23147.1	85	86	84	86	0.0388696	RALF-like 3	RALFL3	PF05498	PTHR34270
AT1G23150.1	52	64	51	64	0.326837	hypothetical protein			PTHR33270,PTHR33270:SF5			LOC_Os02g21920.1	CPuORF24 - conserved peptide uORF-containing transcript, expressed
AT1G23170.2	93	87	92	87	-0.0837128	transmembrane protein (Protein of unknown function DUF2359, transmembrane)		PF10151	PTHR13448,PTHR13448:SF1			LOC_Os01g03760.1	expressed protein
AT1G23180.1	313	205	311	205	-0.598369	ARM repeat superfamily protein		PF00514	PTHR23315,PTHR23315:SF90		GO:0005515	LOC_Os01g34080.1	armadillo/beta-catenin-like repeat family protein, expressed
AT1G23190.1	2243	1954	2230	1962	-0.185202	Phosphoglucomutase/phosphomannomutase family protein	PGM3	PF00408,PF02879,PF02880,PF02878	PTHR22573,PTHR22573:SF47		GO:0071704,GO:0016868,GO:0005975	LOC_Os03g50480.1	phosphoglucomutase, putative, expressed
AT1G23200.1	11	14	11	14	0.361386	Plant invertase/pectin methylesterase inhibitor superfamily		PF04043,PF01095	PTHR31707,PTHR31707:SF27		GO:0004857,GO:0042545,GO:0030599,GO:0005618	LOC_Os01g21034.1	pectinesterase, putative, expressed
AT1G23205.1	583	384	579	385	-0.587881	Plant invertase/pectin methylesterase inhibitor superfamily protein		PF04043	PTHR31080,PTHR31080:SF10		GO:0004857	LOC_Os06g49760.1	invertase/pectin methylesterase inhibitor family protein, putative, expressed
AT1G23220.1	140	137	139	138	-0.0125721	Dynein light chain type 1 family protein		PF01221	PTHR11886,PTHR11886:SF39	KOG3430	GO:0007017,GO:0005875	LOC_Os02g36990.1	dynein light chain type 1 family protein, putative, expressed
AT1G23230.1	712	447	708	449	-0.657201	mediator of RNA polymerase II transcription subunit		PF11573	PTHR12691,PTHR12691:SF10			LOC_Os02g49992.1	expressed protein
AT1G23260.1	190	205	189	205	0.119578	MMS ZWEI homologue 1	MMZ1	PF00179	PTHR24067,PTHR24067:SF118	KOG0896		LOC_Os03g50440.1	ubiquitin-conjugating enzyme, putative, expressed
AT1G23280.1	171	180	170	180	0.0874874	MAK16 protein-like protein		PF04874,PF01778	PTHR23405,PTHR23405:SF4	KOG3064		LOC_Os07g16950.4	Mak16 protein domain containing protein, expressed
AT1G23290.1	1443	1833	1435	1840	0.358591	Ribosomal protein L18e/L15 superfamily protein	RPL27AB	PF00828	PTHR11721,PTHR11721:SF6	KOG1742		LOC_Os03g29460.1	60S ribosomal protein, putative, expressed
AT1G23300.1	1443	1833	1435	1840	0.358591	MATE efflux family protein		PF01554	PTHR11206,PTHR11206:SF79	KOG1347	GO:0055085,GO:0016020,GO:0015297,GO:0015238,GO:0006855	LOC_Os08g43654.1	MATE efflux family protein, putative, expressed
AT1G23310.1	1910	2106	1899	2114	0.154378	glutamate:glyoxylate aminotransferase	GGT1	PF00155	PTHR11751,PTHR11751:SF373		GO:0030170,GO:0009058	LOC_Os07g01760.1	aminotransferase, classes I and II, domain containing protein, expressed
AT1G23320.1	25	20	25	20	-0.308614	tryptophan aminotransferase related 1	TAR1	PF04864	PTHR11751,PTHR11751:SF367		GO:0016846	LOC_Os01g07500.1	alliin lyase precursor, putative, expressed
AT1G23330.1	146	101	145	101	-0.52498	alpha/beta-Hydrolases superfamily protein			PTHR34043,PTHR34043:SF1			LOC_Os05g33820.1	lipase, putative, expressed
AT1G23340.1	52	41	52	41	-0.329564	carboxyl-terminal proteinase, putative (DUF239)		PF14365,PF03080	PTHR31589,PTHR31589:SF19			LOC_Os06g28000.1	carboxyl-terminal peptidase, putative, expressed
AT1G23350.1	58	77	57	77	0.434856	Plant invertase/pectin methylesterase inhibitor superfamily protein		PF04043	PTHR31707		GO:0004857	LOC_Os05g20570.1	invertase/pectin methylesterase inhibitor family protein, putative, expressed
AT1G23360.1	162	182	161	182	0.181779	S-adenosyl-L-methionine-dependent methyltransferases superfamily protein	MENG	PF13847	PTHR10108,PTHR10108:SF711	KOG1540		LOC_Os04g42870.2	methyltransferase domain containing protein, putative, expressed
AT1G23380.2	55	35	54	35	-0.646576	homeobox protein knotted-1-like 6	KNAT6	PF03789,PF05920,PF03790,PF03791	PTHR11850,PTHR11850:SF99	KOG0773	GO:0003677,GO:0006355,GO:0005634	LOC_Os01g19694.1	Homeobox domain containing protein, expressed
AT1G23390.1	417	386	415	387	-0.099767	Kelch repeat-containing F-box family protein		PF00646	PTHR24414,PTHR24414:SF35		GO:0005515	LOC_Os01g50840.1	expressed protein
AT1G23400.1	468	418	465	419	-0.151179	RNA-binding CRS1 / YhbY (CRM) domain-containing protein	CAF2	PF01985	PTHR31846,PTHR31846:SF5		GO:0003723	LOC_Os01g21990.1	CRS2-associated factor 2, chloroplast precursor, putative, expressed
AT1G23410.1	95	82	94	82	-0.198811	Ribosomal protein S27a / Ubiquitin family protein		PF11976,PF01599	PTHR10666	KOG0004	GO:0006412,GO:0005840,GO:0003735	LOC_Os01g22490.1	40S ribosomal protein S27a, putative, expressed
AT1G23420.2	69	62	68	62	-0.13033	Plant-specific transcription factor YABBY family protein	INO	PF09011	PTHR31675,PTHR31675:SF8		GO:0007275	LOC_Os03g44710.2	YABBY domain containing protein, putative, expressed
AT1G23440.1	224	235	222	236	0.0859215	Peptidase C15, pyroglutamyl peptidase I-like protein		PF01470	PTHR23402,PTHR23402:SF17	KOG4755		LOC_Os09g23280.1	pyrrolidone-carboxylate peptidase, putative, expressed
AT1G23460.1	135	128	134	128	-0.0636276	Pectin lyase-like superfamily protein		PF00295	PTHR31375,PTHR31375:SF29		GO:0005975,GO:0004650	LOC_Os02g03750.1	polygalacturonase, putative, expressed
AT1G23465.1	14	19	14	19	0.454	Peptidase S24/S26A/S26B/S26C family protein		PF00717	PTHR12383,PTHR12383:SF23	KOG0171	GO:0016020,GO:0008236,GO:0006508	LOC_Os11g40500.3	OsSigP7 - Putative Type I Signal Peptidase homologue; employs a putative Ser/Lys catalytic dyad, expressed
AT1G23480.1	6	11	5	11	0.946414	cellulose synthase-like A3	CSLA03	PF13632	PTHR32044,PTHR32044:SF10			LOC_Os06g42020.1	CSLA9 - cellulose synthase-like family A, expressed
AT1G23490.1	2831	4354	2815	4371	0.634734	ADP-ribosylation factor 1	ARF1	PF09439	PTHR11711,PTHR11711:SF181	KOG0070		LOC_Os01g59790.1	ADP-ribosylation factor, putative, expressed
AT1G23510.1	5	2	5	2	-1.30847	OBP32pep protein			PTHR31385,PTHR31385:SF1			LOC_Os09g15835.1	OBP32pep, putative, expressed
AT1G23530.1	55	45	54	45	-0.278763	transmembrane protein			PTHR33429,PTHR33429:SF7			LOC_Os02g47830.1	expressed protein
AT1G23540.1	25	18	25	18	-0.460301	Protein kinase superfamily protein	PERK12	PF07714	PTHR27001,PTHR27001:SF36	KOG1187	GO:0006468,GO:0004672	LOC_Os06g29080.1	expressed protein
AT1G23550.1	28	22	28	22	-0.334587	similar to RCD one 2	SRO2	PF12174	PTHR32263,PTHR32263:SF8			LOC_Os03g63770.2	RCD1, putative, expressed
AT1G23560.1	5	3	4	3	-0.572162	OBP32pep, putative (DUF220)		PF02713	PTHR31385,PTHR31385:SF1			LOC_Os09g15835.1	OBP32pep, putative, expressed
AT1G23710.1	306	136	304	136	-1.15934	hypothetical protein (DUF1645)		PF07816	PTHR33095,PTHR33095:SF3			LOC_Os01g45250.1	DUF1645 domain containing protein, putative, expressed
AT1G23730.1	496	549	493	551	0.161125	beta carbonic anhydrase 3	BCA3	PF00484	PTHR11002,PTHR11002:SF15	KOG1578	GO:0008270,GO:0004089	LOC_Os01g45274.3	carbonic anhydrase, chloroplast precursor, putative, expressed
[truncated: 19,287 more rows]
